# Supplementary material for: Maternal Influences on the Transmission of Leukocyte Gene Expression Profiles in Population Samples from Brisbane, Australia
Source: PLoS One. 2010 Dec 31;5(12):e14479. doi: 10.1371/journal.pone.0014479 (PMC3013110; doi:10.1371/journal.pone.0014479)
Supplement: Table S4 — ToppFun gene enrichment results. (1.15 MB XLS) [file pone.0014479.s005.xls]

## Sheet: PC1 MN NLP5
TOPPFUN OUTPUT FOR ALL TRANSCRIPTS AT NLP>5 (P<0.00001) FOR BP1 COMPARISON (PC1 in MN study)
				P-value	Hits in List	Count in DB	Targets
TRANSCRIPTION FACTOR BINDING SITES
TFBS	SCGGAAGY_V$ELK1_02	SCGGAAGY_V$ELK1_02		0	324	871	BANF1,CES2,ACTB,B3GALT4,TRADD,RNGTT,RNMT,AP1S2,AP1B1,AGL,PER2,SYNJ1,FBXL6,B3GAT3,TAX1BP1,ALDOA,MRPL52,PAPD4,BTAF1,AIP,NFS1,SLC25A4,TAF1B,APEH,LRRFIP2,ARHGAP1,RHOA,FIBP,ATM,ATP5A1,ATP2A2,BAD,ATP7A,LSM4,PRDX5,BCAT2,BCKDHA,ASB6,ASB8,CXCR5,BNIP2,COPS3,HAT1,YARS,SLC25A20,CGGBP1,PRPF18,HIRIP3,ANKRD17,NIF3L1,CARS,GGA1,EIF3H,PDE5A,CCNT1,BECN1,STX10,PTPN23,RFXANK,UNC50,CDC2L5,ZFYVE16,CWC15,CP110,CHUK,PPHL…
TFBS	RCGCANGCGY_V$NRF1_Q6	RCGCANGCGY_V$NRF1_Q6		0	250	654	ACTB,ADAM10,EED,AP1G2,CPNE1,AP2A1,SNURF,PAPD4,DAZAP1,PLOD3,ARRB2,RHOA,ATM,ATP5C1,DNAJA3,BAD,ATP5D,ATP5O,PGLS,BCKDHA,ASB8,SPOP,CAPNS1,AKR7A2,UPF2,CDK10,PTCD1,SMARCA5,RANBP3,CASP2,PPM1D,EIF3A,MAK10,RTCD1,CDC5L,RFXANK,USO1,BCLAF1,ZFYVE16,SLC35A4,TTRAP,RNF40,PIAS4,VPS24,CCS,COX6C,MRPL30,CRY1,PDCD6IP,PAIP2,HNRPDL,ARPC2,ARPC5,WAC,SCAMP3,SCAMP2,CNIH,SFRS14,TRIM28,RBM12,PREB,ACTR1A,TOPORS,TXNDC9,DDX3X,PD…
TFBS	TGCGCANK_UNKNOWN	TGCGCANK_UNKNOWN		0	155	409	EED,SNURF,DLEU2,PAPD4,ANGPT1,AIP,PLOD3,ARRB2,RHOA,ASB8,SPOP,CBX4,CALM3,UPF2,SMARCA5,RANBP3,NUMB,CCNG2,CDC5L,RFXANK,CD47,C2CD2L,TTRAP,DTX2,LSM8,VRK3,CTBP2,ARL6IP4,PREB,ACTR1A,RBM7,DDX3X,DAD1,DNMT1,DLD,MAGED1,TP53I11,COQ3,EIF4A2,EIF4G2,COPS5,CCNI,PRDX3,RALBP1,FKBP2,RAB10,PLEKHA1,ESRRA,FRS3,EWSR1,RNF24,MAP4K1,WWP1,CYB561D2,RAB35,GGNBP2,CKLF,MCRS1,SRRM1,POP7,DNAJA2,EPS15L1,MGEA5,GTF3C1,HNRNPL,RBPJ,RA…
TFBS	MGGAAGTG_V$GABP_B	MGGAAGTG_V$GABP_B		0	191	560	CES2,ACTB,RNMT,AGL,PER2,SYNJ1,TAX1BP1,AMD1,BTAF1,APEH,OSTF1,ARRB2,ARHGAP4,ARHGAP1,FIBP,PICALM,ATP6V1A,ATP7A,PRDX5,BCAT2,BNIP2,CANX,COPS3,CAPZA1,CAST,HAT1,HIRIP3,ELOVL5,NIF3L1,GGA1,HYAL2,VAMP8,CDK5,ATL3,CDC2L1,CDC5L,CD79B,CDC2L5,BCLAF1,ZFYVE16,CHM,CHUK,C2CD2L,CCR6,TLK1,ACSL5,WDR1,DDX47,PAIP2,DMTF1,ROD1,CPT2,GMPR2,DPP3,SCAMP2,UNC13D,YTHDF3,TRPV2,DDOST,DGKA,UBE4A,DNMT1,ZNF408,LPXN,DGUOK,ARHGEF6,MAGE…
TFBS	GCCATNTTG_V$YY1_Q6	GCCATNTTG_V$YY1_Q6		0	123	328	CCNK,CD164,GBF1,AP3D1,CPNE1,MTMR3,WSB1,AP1G1,AIP,ARF1,DYRK1B,ATF4,ATP5A1,USP14,ATP5F1,ATP6V0C,RBM10,BTF3,RECK,CD4,SNX17,CDKN1B,SCRN1,KIAA0174,MED24,COX7B,CRKL,DGCR2,ARPC2,RBM12,RNF26,CSNK1A1,DDX3X,MPDU1,EP300,EIF4G2,EEF1B2,RAB10,PMF1,SEC23A,GNAI2,DDX17,HNRNPC,HIF1A,IDH3G,LYPLA2,DOCK8,IRAK1,ZBTB4,ILF3,PHF12,AKAP8L,LMNB1,CAB39L,RAB22A,CLK4,UPF3B,MAP3K4,MNT,L3MBTL2,UBE2J2,NSF,STRN3,NACA,STRN4,NFE2L1…
TFBS	TMTCGCGANR_UNKNOWN	TMTCGCGANR_UNKNOWN		0	54	109	MBTPS1,AGL,ASH2L,SLC25A4,ATP5F1,SLC25A11,ZZZ3,DENR,CDC5L,MATR3,CHUK,COX7B,MRP63,MAPK14,DDX3X,DGUOK,BZW1,WDR6,GGNBP2,DBR1,ZFP91,SAP18,PRDX4,HSPA4,RBPJ,IDH3G,LAMP1,UPF3B,NDUFA11,ASXL1,MDH2,TTC14,PPP1R12A,RAB33B,RPL10A,NFYC,CNOT3,RPL12,RPL17,LRSAM1,PTPN4,PURA,SFRS5,CD2AP,RPS6,RPS15A,RPS19,BANP,SUPT5H,MAP3K7,VDAC3,UBE2D3,ADNP,POLDIP3
TFBS	V$ELK1_02	V$ELK1_02		0.000353	71	185	AP1B1,PAPD4,BTAF1,ARHGAP1,ATP5A1,HAT1,CGGBP1,PRPF18,CDC2L5,CP110,PPHLN1,MED15,AP2S1,ACTR2,DDOST,DDX5,IPO4,TBC1D17,ZNF408,EEF1B2,LMAN2,MRPL3,INSIG2,NAT5,DNAJA2,GTF2A2,GTF3C1,HMGA1,POLL,IL2RG,RAP2C,LYPLA2,GABARAPL2,ITM2C,FERMT3,COG3,MTPN,DIABLO,OGG1,PRKACB,PRCP,LEPRE1,BMP2K,TRMT1,RBM22,RPL19,MRPL13,PSMC6,PSMC1,PSMD12,PURB,SNRPB,SON,SMS,SHC1,VPS52,SDHD,KLHDC3,DPP8,KRTCAP2,STK4,SUPT5H,DHX30,ZNF22,NR1…
TFBS	KCCGNSWTTT_UNKNOWN	KCCGNSWTTT_UNKNOWN		0.000388	41	89	ACLY,AP3D1,AP1G1,ZNF524,PICALM,OGT,KIAA0528,USP3,CRKL,DMTF1,CSNK1A1,DDX5,DHX15,E2F3,EIF4A2,EIF4G2,FAAH,FOXO3,SYNCRIP,ZFP91,SRRM1,STAG2,DDX17,PTBP2,RBPJ,CBX3,ILF3,LNPEP,MAX,CNOT3,WDR33,POU2F1,PPP2R2B,RFX1,PTMA,YWHAE,XPO1,UBC,ADNP,DAP3,SYT11
TFBS	V$TEL2_Q6	V$TEL2_Q6		0.000635	67	174	AGL,MRPL52,AMD1,BTAF1,ARRB2,ARHGAP4,ARHGAP1,FIBP,CANX,CAPZA1,CAST,CGGBP1,HIRIP3,HYAL2,CD3E,VAMP8,ATL3,CD79A,C2CD2L,USP3,ACSL5,DMTF1,GMPR2,DPP3,SCAMP2,DGKA,ZNF408,RNPS1,ESRRA,RIN3,MCRS1,CAP1,SF3B4,RGS14,HMGA1,POLL,JUNB,MGAT4A,LYPLA2,IL11RA,LYN,LTBR,LCP1,DAPP1,DIABLO,MAP3K11,OGG1,FURIN,CPNE8,NEDD8,RAB43,PRKACB,ARHGAP15,RALB,NXT2,PTK2,MAP4K2,PTPN6,TRIM41,SNRPB,SHC1,SIPA1,CORO1C,TCF12,TFE3,UBE2N,FCHO1
TFBS	V$ELK1_01	V$ELK1_01		0.002426	72	197	CES2,IRF2BP1,TRPC4AP,ARHGAP1,ARHGDIB,C4orf41,PRDM1,TAGLN2,CAPZA1,CAST,HAT1,CD37,CCNT1,PPHLN1,LTB4R,CLN5,SH2D3C,DMTF1,GMPR2,DPP3,MAPK14,DDX1,DGKA,TBC1D17,SNIP1,ZNF408,ARHGEF6,APBA3,ESRRA,MAP4K1,FNTA,GGNBP2,IFI30,DBR1,INSIG2,MGEA5,POLD4,RAP2C,ITGB7,LYL1,LCP1,MTPN,VPS16,FURIN,NEDD8,PPP1CA,TFB2M,MRPL13,MCTS1,MAP4K2,SHC1,SIPA1,LDOC1,RXRB,TGFBR2,CDC26,TLE4,DPP8,ELP2,STK10,SP3,ACIN1,WAS,VCL,NR1H2,UBE2D3…
TFBS	V$NRF2_01	V$NRF2_01		0.004471	70	193	IQGAP1,AGL,B3GAT3,BTAF1,PLOD3,ARHGAP4,ARHGAP1,FIBP,ZFHX3,PRDX5,BCL2,KCNAB2,CHUK,DAZAP2,DTX2,TOMM70A,CPT2,ACTR2,ARPC5,SCAMP2,DDOST,DDX5,DAXX,TBC1D17,DNMT1,ZNF408,DR1,RNPS1,ERCC1,MRPL3,BAZ1A,WWP2,CAP1,INSIG2,GNAI2,GNAI3,CUTC,SF3B4,GTF2A2,GTF3C1,HNRNPD,RAP2C,RAB1B,ITM2C,MTPN,DIABLO,CBX8,PRKCSH,PRKACB,RPL6,PSMD12,SFRS6,SHC1,VPS52,SDHD,RPS5,RPS10,RPL34,RPL27,RRAS,TNFRSF1A,DPP8,STK4,ZNF22,ACIN1,NR1H2,U…
TFBS	V$ETS_Q4	V$ETS_Q4		0.00497	71	197	AP1G2,AMD1,CHIC2,ARRB2,ARHGAP4,CANX,CAPZA1,CAST,CALM2,KCNAB2,MADD,PPP1R16B,CBFA2T3,HYAL2,CD79A,DOCK11,USP3,ACSL5,DMTF1,GMPR2,ACTR3,DPP3,SPNS3,DGKA,LPXN,DDX23,BAG4,GMFG,E2F3,SIGIRR,ERCC1,ETF1,MAP4K1,CORO1A,FOXO3,RIN3,GGNBP2,CAP1,ZFP91,RGS14,LSM1,HMGA1,NCR3,POLD4,RAP2C,JUNB,ITPR2,ITGB7,MGAT4A,IL11RA,LYN,LTBR,LCP1,SND1,FURIN,CPNE8,NDUFA4,NEDD8,RAB43,PLCB2,ARHGAP15,PTK2,MAP4K2,PTPN11,TRIM41,RPS3,RPL4…
TFBS	V$CETS1P54_01	V$CETS1P54_01		0.010928	71	201	AP1B1,TRPC4AP,B3GAT3,MRPL52,BTAF1,ARRB2,ARHGAP1,C4orf41,CAST,CGGBP1,CD3E,CP110,PPHLN1,TOMM70A,DDX47,DMTF1,GMPR2,ACTR2,DDOST,TBC1D17,DNMT1,ZNF408,BAG4,DR1,MRPL3,FNTA,CAP1,INSIG2,GNAI3,SPRY2,DNAJA2,GTF3C1,RGS14,IPO7,LSM1,HNRNPD,POLL,RAP2C,LYPLA2,IL11RA,ITM2C,WDR8,MTPN,XAB2,OGG1,NEDD8,PRKACB,RPL6,MCTS1,PSMD12,SNRPB,SFRS6,SHC1,SIPA1,VPS52,RPLP2,RRAS,DPP8,TFE3,KRTCAP2,STK10,STK4,SPI1,RNF31,ZNF22,NR1H2…
TFBS	V$YY1_Q6	V$YY1_Q6		0.016451	65	182	CCNK,GBF1,AP3D1,SNURF,ARF1,ATF4,ATP5A1,ZNF524,ATP5F1,BTF3,RECK,STX10,SLC25A19,DGCR2,RNF26,CSNK1A1,DDX23,EEF1A1,MPDU1,EP300,PMF1,FOXO3,ATP5H,UBE4B,HIF1A,LYPLA2,IRAK1,ZBTB4,RAB22A,UPF3B,MAP3K4,MNT,UBE2J2,NACA,STRN4,NFYC,SLC26A6,CNOT3,POU2F1,POLR2A,PRKCSH,PNRC2,MYNN,RALA,PTBP1,PTMA,RAB5A,SNRPN,RPN1,RXRB,TIA1,TIAL1,TAF6,RIF1,LPHN1,YY1,UBE3A,TSC1,TARDBP,OSBPL11,DAP3,NCDN,SNX13,SYT11,BOP1
TFBS	V$NFMUE1_Q6	V$NFMUE1_Q6		0.021647	68	194	GBF1,AP3D1,CPNE1,ARF1,XPR1,ATF4,ATP5F1,PICALM,ATP6V0C,BMI1,EIF3A,CD4,CD3E,BCLAF1,SLC35A4,KIAA0528,CLK1,DGCR2,RBM12,RNF26,DHX15,EEF1A1,E4F1,EP300,EIF4G2,FASTK,FBXO11,ATP5H,ZFP91,APBB3,SRRM1,STAG1,UBE4B,DEAF1,HNRNPD,PTBP2,IRAK1,RAB22A,UBE2J2,NACA,STRN4,NFYC,CNOT3,MRPL38,PPP1CC,WDR33,POU2F1,PRKCSH,MYNN,RALA,RPA2,PRPSAP1,RAB1A,RPS27,TIA1,VAMP2,RIF1,CLSTN1,YY1,UBE2D3,TSC1,PHF15,USP48,DAP3,NCDN,SNX13,Z…
TFBS	V$YY1_02	V$YY1_02		0.021947	66	187	CCNK,GBF1,AP3D1,WSB1,AP1G1,AIP,ARF1,DYRK1B,ZNF524,BAD,ATP5F1,BTF3,CAMLG,ZZZ3,STX10,CHD4,SCRN1,DGCR2,RASGRP2,RNF26,TBC1D17,DHX15,MPDU1,SELT,EP300,EEF2,FASTK,RAB10,FOXO3,GLG1,DEAF1,PTBP2,RAB1B,MGAT4B,LYPLA2,UPF3B,MAP3K4,UBE2J2,STRN3,NACA,STRN4,NFYC,CNOT3,POU2F1,UBL3,PRKCSH,PPP2CA,MYNN,RALA,ARID4A,ABCE1,RAB1A,TIA1,ASXL2,TAF6,RIF1,YWHAE,UBTF,UBA52,TSC1,ADNP,OSBPL11,DAP3,NCDN,SNX13,ZNF207
TFBS	ACTAYRNNNCCCR_UNKNOWN	ACTAYRNNNCCCR_UNKNOWN		0.029321	102	320	AAMP,IRF2BP1,ADSS,TRPC4AP,TRIM23,BUB3,NCOA3,HIRIP3,ATL3,SNX17,MLL4,DTX2,AP2M1,AP2S1,CRYZL1,COX7B,SCAMP3,DNM1L,CDC40,ACTR1A,DFFA,RAB8B,APBA3,TTC13,IPO13,RALBP1,PLEKHA1,ARID5A,ETFDH,RPP40,PDCD10,CYB561D2,CBLL1,RPP21,RDH11,BET1,RABAC1,IPO7,STXBP5,HSD17B4,SGSM3,RAB1B,RDH14,PHF12,HBP1,PABPC1,VPS41,PTDSS2,SND1,UPF3B,ASXL1,MTR,MAX,ITCH,GRWD1,NTHL1,NUMA1,PA2G4,PCM1,NFKBIB,MRPL34,SNX16,UBL3,PPP6C,PRCC,PET…
TFBS	V$AHR_Q5	V$AHR_Q5		0.036374	61	172	EED,BIN1,DAZAP1,TRIM23,ARRB2,RHOA,EIF3A,CDKN1B,AP3S1,HNRPDL,WAC,DHX40,NPHP4,EIF4A2,GADD45G,RAB10,STARD10,FUT8,FOXO3,DSTN,CMIP,ZFP91,STAG1,H2AFZ,PRDX4,NR3C1,SERP1,HNRNPL,RBPJ,MOSPD2,INSIG1,MAZ,MAX,MNT,PCBP2,RTN4,SNX14,WDR33,POU2F1,PPP2R2B,SSBP4,REV3L,REL,FHOD1,RAVER1,PTMA,RAB6A,RNF123,SET,PAQR4,SFRS6,ING3,BTBD3,LPHN1,YWHAZ,MBD3,MLLT10,CBX6,LENG8,MRPL45,BCL9L
TFBS	V$ELF1_Q6	V$ELF1_Q6		0.046119	66	191	IQGAP1,ADD3,AIF1,ALOX5AP,ARRB2,XPR1,ARHGDIB,ATP2A3,MADD,CD37,CD79B,CEBPE,MED15,CLIC1,ACSL5,CREBBP,DMTF1,ARPC2,DPP3,TBC1D17,E2F3,PITPNM1,ELF4,ERF,SDCCAG3,BAZ1A,DNAJA2,FBLN5,GRB2,ITPR2,ITGB7,MARCKS,PABPC1,LIMS1,DAPP1,MTPN,MAP3K11,DUSP22,NCK1,ELOVL1,SAMSN1,PPP3CA,PLCB2,RELA,REL,RALA,APOB48R,RPL17,RNF5,MAP4K2,SORL1,SNX2,RPL34,TLN1,DPP8,TFE3,STIM1,STAT6,RNF31,INPP5F,VIM,WAS,TYROBP,TSSC1,NR2C2,ANKRD28
MICRO RNA BINDING SITES
MicroRNA	miR-1	miR-1	PicTar	0	152	408	ABCB7,ADAR,RNGTT,AP3D1,AP1G1,SYNJ2,DCP2,FUBP1,ASH2L,BTAF1,ANXA2,SLC16A3,ATP6V1B2,ATP6V0C,NCOA3,ZFP36L1,GNPDA2,CALM2,VAMP4,CDC42,MTSS1,MATR3,PTPLAD1,HDAC4,AZIN1,RNF40,JOSD1,WDR1,CLTC,MEX3C,NR1H3,UBR5,RNF138,DDX5,SLC25A22,UBE4A,NMT2,DHX15,BAG4,DYRK1A,ELF1,EFNB2,YWHAQ,ETS1,PDCD10,AKAP11,WDR6,C9orf82,SLC30A9,CAP1,ZNF580,BPNT1,PHF20L1,ZFP91,GNB1,ZBTB7B,GALNT1,BET1,GTF2B,STAG2,GRK6,GPD2,ANP32B,PDCD4,SE…
MicroRNA	miR-206	miR-206	PicTar	0	150	404	ABCB7,ADAR,RNGTT,AP3D1,AP1G1,SYNJ2,DCP2,FUBP1,ASH2L,BTAF1,ANXA2,SLC16A3,ATP6V1B2,ATP6V0C,NCOA3,ZFP36L1,GNPDA2,CALM2,VAMP4,CDC42,MTSS1,MATR3,PTPLAD1,HDAC4,AZIN1,RNF40,JOSD1,WDR1,CLTC,MEX3C,NR1H3,UBR5,TMUB2,RNF138,DDX5,SLC25A22,UBE4A,NMT2,DHX15,BAG4,ELF1,EFNB2,YWHAQ,ETS1,PDCD10,AKAP11,WDR6,C9orf82,SLC30A9,CAP1,ZNF580,BPNT1,ZFP91,GNB1,ZBTB7B,BET1,GTF2B,STAG2,GRK6,GPD2,ANP32B,PDCD4,SERP1,HMGCR,HMGN1,…
MicroRNA	ACATTCC,MIR-1	ACATTCC,MIR-1	MSigDB	2e-06	108	283	ABCB7,ACACA,ADAR,RNGTT,AP3D1,AP1G1,SYNJ2,SLC7A6,ANXA2,PICALM,ATP6V1A,ATP7A,NCOA3,ZFP36L1,TAGLN2,NCK2,GNPDA2,OGT,C20orf117,VAMP4,CDC42,MATR3,PTPLAD1,HDAC4,AZIN1,JOSD1,CLTC,MEX3C,NR1H3,CEBPZ,UBR5,RNF138,DDX5,SLC25A22,UBE4A,DHX15,BAG4,EFNB2,YWHAQ,TSPAN9,ETS1,NUP50,PDCD10,AKAP11,WDR6,G6PD,C9orf82,ZNF580,FAM91A1,BPNT1,BET1,GRK6,GPD2,DDX17,ANP32B,HMGCR,HMGN1,HSPD1,ZBTB4,MKL1,TRAPPC3,KTN1,RNF38,MNT,C1GA…
MicroRNA	ACATTCC,MIR-206	ACATTCC,MIR-206	MSigDB	2e-06	108	283	ABCB7,ACACA,ADAR,RNGTT,AP3D1,AP1G1,SYNJ2,SLC7A6,ANXA2,PICALM,ATP6V1A,ATP7A,NCOA3,ZFP36L1,TAGLN2,NCK2,GNPDA2,OGT,C20orf117,VAMP4,CDC42,MATR3,PTPLAD1,HDAC4,AZIN1,JOSD1,CLTC,MEX3C,NR1H3,CEBPZ,UBR5,RNF138,DDX5,SLC25A22,UBE4A,DHX15,BAG4,EFNB2,YWHAQ,TSPAN9,ETS1,NUP50,PDCD10,AKAP11,WDR6,G6PD,C9orf82,ZNF580,FAM91A1,BPNT1,BET1,GRK6,GPD2,DDX17,ANP32B,HMGCR,HMGN1,HSPD1,ZBTB4,MKL1,TRAPPC3,KTN1,RNF38,MNT,C1GA…
MicroRNA	GTGCCTT,MIR-506	GTGCCTT,MIR-506	MSigDB	3e-06	216	672	IQGAP1,ACADVL,PLDN,ACTN4,CD164,WSB1,AES,AP1G1,GAPVD1,AHR,ALDH9A1,ABCD1,TSC22D1,PAPSS2,ANXA11,CHIC2,PLOD3,RPS6KA4,LRRFIP2,RHOG,ZFAND3,AXIN1,ATP7A,TMEM184B,BCKDHA,ASF1A,BCL6,ZFP36L1,NCK2,NSMAF,PTTG1IP,LMO4,TPST2,C10orf137,EIF3B,PDE5A,VAMP4,ATL3,CD151,SLC35A4,HDAC4,SERTAD2,RB1CC1,AMMECR1,CPD,CRAT,ROD1,SCAMP2,YTHDF3,C7orf26,RBM12,MAPK14,FLOT1,TMEM109,PCYOX1,DDX3X,VPS37B,UBE4A,DNASE2,DNM2,ARHGEF6,E2F3…
MicroRNA	miR-124a	miR-124a	PicTar	5.8e-05	198	626	ABCA2,IQGAP1,ABR,ACACA,PLDN,ACTB,RAB11A,CD164,SNX4,PARP1,AP1G1,AHR,BTAF1,ANXA11,ANXA7,ARHGDIA,RHOG,MTMR6,USP14,ZFAND3,TMEM184B,PTTG1IP,GNPDA2,CASC4,CAPN2,SLC25A20,ELOVL5,GGA1,EIF3J,CCDC28A,RWDD4A,CDK4,CDH11,CHMP2B,HDAC4,NCKIPSD,SLK,KIAA0174,PJA2,BRP44L,GLTP,ROD1,ARPC5,SCAMP2,CSTF3,NAMPT,MAPK14,TMEM109,PCYOX1,CSNK1G2,DHX40,VPS37B,TIPRL,SNIP1,DYNC1LI2,ZNF362,DIAPH2,ZRANB2,ROCK2,LITAF,DUSP6,WTAP,NCO…
MicroRNA	CTTGTAT,MIR-381	CTTGTAT,MIR-381	MSigDB	0.000156	75	192	ACTG1,ZFAND3,GORASP2,CGGBP1,EIF3A,MTSS1,CHD4,AZIN1,NLK,ROD1,CSTF3,MBNL2,NAMPT,UBR5,DHX40,UBE4A,ROCK2,ARID4B,EIF4G2,ACSL3,PAPOLA,ETF1,ETS1,ZMYND11,VCPIP1,PSIP1,NIN,SYNCRIP,KCTD3,RRAGB,SRRM1,STAG1,KHDRBS1,APPBP2,HNRNPH2,KPNA3,RAP2C,INSIG1,HBP1,BIRC6,ITCH,AGPAT3,CNOT7,TBC1D15,UBN1,NDUFAB1,NFKBIA,SMEK2,ZFYVE20,BTBD7,BRD7,PDGFC,C5orf41,KIAA1267,SLC38A2,SIAH1,RPS6KB1,SNRK,ASXL2,ARGLU1,RBM16,RAB11FIP2,L…
MicroRNA	CAGCTTT,MIR-320	CAGCTTT,MIR-320	MSigDB	0.000397	88	240	ADAM10,DAZAP1,RHOG,PCSK7,SLC10A3,ATP6V1A,ULK1,CALD1,CALM3,OGT,PPP1R16B,EIF3J,CDC2L5,HDAC4,AZIN1,FAM49B,TOMM70A,ARPC5,YTHDF3,CTNNB1,PLXNC1,DAB2,DBN1,VPS37B,DHX15,CAB39,TSC22D3,RBM45,N4BP1,YWHAQ,FBXO11,FTL,DHDDS,SUV420H1,ZFP91,STAG2,IPO7,GRB2,HNRNPC,RAP2C,MIER1,GPBP1,TMEM9B,MCL1,WRNIP1,C15orf24,CNOT7,MTDH,PPM1A,PPM1B,MAPK1,ZNF280C,TRMU,PLAG1,PHF1,MRPS25,RAP1A,RASA1,C5orf41,RAD9A,TRIM41,SPOPL,PURB,S…
MicroRNA	miR-302b-star	miR-302b-star	PicTar	0.000555	91	252	ACVR1,AP1G1,SYNJ1,DAZAP1,AMD1,ATP2A2,BCL6,CGGBP1,LSM14A,ELOVL5,C1orf52,CPEB2,MAK10,CDH11,LRBA,TIPARP,C1orf212,ZEB2,DAZAP2,FAM49B,NLK,GLTP,CRY1,CD320,MBNL2,FRY,ARID4B,CDC42BPB,ENO2,CLINT1,EIF4B,N4BP1,MAN1A2,ZMYND11,PDCD10,C5orf24,GGNBP2,SEC23A,SLC9A6,GNB1,TMED7,STAG2,KHDRBS1,GRB2,HSF2,HMGB1,HSPD1,FOXN2,KPNA3,ITGB1,LTC4S,LNPEP,NUFIP2,ATP2C1,ASXL1,BAZ2B,FURIN,MYC,PPP1CB,PRKACB,PLAGL2,CLEC2D,RAP1B,RA…
MicroRNA	ACTTTAT,MIR-142-5P	ACTTTAT,MIR-142-5P	MSigDB	0.000686	97	274	ACTN4,PRPF4B,AP1G1,TRPC4AP,AHR,SYNJ1,C14orf28,ALCAM,FBXL3,RPS6KA4,RHOA,ATP2B1,ZFAND3,ULK1,BTG1,BNIP2,CUL4A,CUL2,CPEB2,SCOC,BECN1,CCNG2,CDK5,CD69,MBIP,TSC22D2,TAOK2,UBE4A,ARID4B,EP300,UBE3C,MED28,WWP1,FAM91A1,CMIP,APBB3,STAG1,MSH6,EXOC5,H3F3A,GRSF1,JMJD1C,BRPF3,ATXN7L2,MAT2B,NETO2,MGAT4B,ALS2,TMEM49,CBX3,ZNF512B,MEA1,MCL1,MKLN1,HIAT1,PCBP1,PCBP2,NFE2L2,PLEKHA3,PPM1G,SNX16,C2orf29,BTBD7,ARID2,REV3L…
MicroRNA	TTTGCAG,MIR-518A-2	TTTGCAG,MIR-518A-2	MSigDB	0.002315	73	197	FBXL5,PICALM,HECTD1,BCL2,ZFP36L1,LARP4,CGGBP1,CUL2,ANKRD17,CPEB2,EIF3J,CD47,HDAC4,NCKIPSD,PLEKHM1,TOMM70A,PJA2,ACTR3,YTHDF3,CTNNB1,SLTM,DHX15,DYRK1A,DUSP6,PPM1F,GNB4,ETF1,CEPT1,RBM25,STAG2,IVNS1ABP,EIF2C2,HMGA1,HMGB1,KPNA3,RAP2C,STK38,NUAK2,LAMP2,KPNA4,RAB22A,ITCH,PPP1R12A,NEDD8,PLEKHA3,PNN,FAM133B,DOCK10,SEH1L,RAB6A,PURB,C18orf25,SET,MKRN1,CORO1C,AMACR,LEMD3,TIMP2,TCF12,RHOT1,SURF4,TACC1,RASGRP4…
MicroRNA	hsa-miR-613	hsa-miR-613	TargetScan	0.002407	202	672	CD164,ADAR,RNGTT,FUBP3,AP3D1,FAM101B,DCP2,FUBP1,ALPL,SLC7A6,ASH2L,BTAF1,ANXA2,OSTF1,SLC16A3,PICALM,ATP6V1B2,ATP6V1A,ZFP36L2,ZFP36L1,TAGLN2,LARP4,NCK2,GNPDA2,ZZZ3,CALM2,CALM1,HIGD1A,NCOA1,VAMP4,CDC42,UNC50,MTSS1,MATR3,PTPLAD1,HDAC4,PLEKHM1,KIAA0528,AZIN1,RNF40,G3BP2,TOMM70A,JOSD1,WDR1,CLTC,MEX3C,NR1H3,CTBP2,NAMPT,UBR5,STX6,RNF138,DDX5,DDX3X,SLC25A22,UBE4A,NMT2,DHX15,SEC22B,SAFB2,EFNB2,ARHGEF3,EHMT…
MicroRNA	hsa-miR-206	hsa-miR-206	TargetScan	0.002407	202	672	CD164,ADAR,RNGTT,FUBP3,AP3D1,FAM101B,DCP2,FUBP1,ALPL,SLC7A6,ASH2L,BTAF1,ANXA2,OSTF1,SLC16A3,PICALM,ATP6V1B2,ATP6V1A,ZFP36L2,ZFP36L1,TAGLN2,LARP4,NCK2,GNPDA2,ZZZ3,CALM2,CALM1,HIGD1A,NCOA1,VAMP4,CDC42,UNC50,MTSS1,MATR3,PTPLAD1,HDAC4,PLEKHM1,KIAA0528,AZIN1,RNF40,G3BP2,TOMM70A,JOSD1,WDR1,CLTC,MEX3C,NR1H3,CTBP2,NAMPT,UBR5,STX6,RNF138,DDX5,DDX3X,SLC25A22,UBE4A,NMT2,DHX15,SEC22B,SAFB2,EFNB2,ARHGEF3,EHMT…
MicroRNA	hsa-miR-1	hsa-miR-1	TargetScan	0.002407	202	672	CD164,ADAR,RNGTT,FUBP3,AP3D1,FAM101B,DCP2,FUBP1,ALPL,SLC7A6,ASH2L,BTAF1,ANXA2,OSTF1,SLC16A3,PICALM,ATP6V1B2,ATP6V1A,ZFP36L2,ZFP36L1,TAGLN2,LARP4,NCK2,GNPDA2,ZZZ3,CALM2,CALM1,HIGD1A,NCOA1,VAMP4,CDC42,UNC50,MTSS1,MATR3,PTPLAD1,HDAC4,PLEKHM1,KIAA0528,AZIN1,RNF40,G3BP2,TOMM70A,JOSD1,WDR1,CLTC,MEX3C,NR1H3,CTBP2,NAMPT,UBR5,STX6,RNF138,DDX5,DDX3X,SLC25A22,UBE4A,NMT2,DHX15,SEC22B,SAFB2,EFNB2,ARHGEF3,EHMT…
MicroRNA	TTTTGAG,MIR-373	TTTTGAG,MIR-373	MSigDB	0.003017	77	212	RAB11A,RNGTT,AP1G1,BUB3,ZFAND3,LARP4,CAPZA2,LSM14A,KRIT1,ELOVL5,SERTAD2,PTPLB,MAFB,AMMECR1,ACTR2,WAC,YTHDF3,MBNL2,CSK,CSNK1E,EEF1A1,VPS26A,WTAP,RNPS1,BAZ1A,PSIP1,PHF20L1,PRR7,NDFIP1,SMNDC1,ARFGEF1,FBLN5,TNRC6A,HIF1A,KPNA3,C9orf72,JAK2,ARHGAP21,WDFY1,NUFIP2,KPNA4,MBP,C1orf63,ORC2L,PELI1,C6orf106,OBFC2A,PPP3CA,NPLOC4,SCYL2,PLAG1,RELB,RAP1A,ARID4A,SEH1L,BRD2,RLF,PURB,SLC38A2,SFRS5,TMED9,IMPAD1,ZNF28…
MicroRNA	miR-182	miR-182	PicTar	0.003338	168	545	ABCA2,SNAP23,ACVR1,ADAM10,SNX4,ADD3,SKAP2,ABCD1,STK19,INTS6,ANXA11,CNNM3,PLOD3,XPR1,ARHGDIA,TMSB10,ATP2A2,ATP1B3,SLC10A3,TBC1D22A,PRDM1,BCAT2,NIPBL,BCL2,ZFP36L1,RECK,LSM14A,CUL2,CBFA2T3,CASP2,EIF3J,EIF3A,NUMB,RWDD4A,CD47,MTSS1,SNX17,DAZAP2,FAM49B,EXOC4,FAM116A,PAIP2,DGCR2,PHF21A,FAM53C,MBNL2,NAMPT,TOPORS,REV1,CSNK1E,DGKQ,DYNC1LI2,DIAPH2,SLC4A7,BAG4,DYRK1A,VPS26A,TSC22D3,DR1,ZAK,EP300,N4BP1,EFNB2,…
MicroRNA	miR-130b	miR-130b	PicTar	0.004054	157	505	ABCB7,ACVR1,AP1G1,SYNJ1,AMPD3,PAPD4,BTAF1,MAP3K14,ARHGAP1,DEDD,TMSB10,DYRK1B,ATP2A2,ATP6V1B2,BTG1,SLAIN1,ZNF282,CANX,CALM2,LSM14A,CPEB2,C1orf144,CD69,HDAC4,ZEB2,SIRT7,CEBPE,G3BP2,CEP170,TOMM70A,VPS24,MAFB,NLK,WDR1,CLTC,CPD,DPP3,PHF21A,CNIH,SFRS11,VPS37B,SNIP1,DNMT1,DNM2,PLAA,ARID4B,E2F3,CMPK1,EP300,N4BP1,SLC25A44,EFNB2,BPTF,ACSL1,RALBP1,FASTK,PNPLA6,FBXO11,RASSF1,FLOT2,RAB35,IER3IP1,SUV420H1,ZFP9…
MicroRNA	ATAGGAA,MIR-202	ATAGGAA,MIR-202	MSigDB	0.006756	42	99	IQGAP1,ACTN1,ACVR1,USP8,ZFAND3,BCL2,BTG1,USP15,GPBP1L1,CREBBP,CTBP2,DDX3X,ZNF362,BAG4,ELF1,TTC13,ACSL3,PLEKHA1,APPBP2,MARCKS,CNOT6,RAB22A,MLL,SNX16,SPRED1,MAPK6,CCDC88A,RASA1,PTEN,DNAJC10,ATXN1,SSBP2,LEMD3,TGFBR2,C20orf11,TCF12,EAF1,STAT3,EIF4E3,BICD2,MED13L,TARDBP
MicroRNA	miR-122a	miR-122a	PicTar	0.006872	47	115	IQGAP1,ABR,ALDOA,BCAT2,STK24,GNPDA2,CALM3,CCNG1,HDAC4,G3BP2,ROD1,CD320,CS,NPEPPS,DYRK1A,TSC22D3,DR1,CDC42BPB,GPR172A,PAPOLA,FUT8,SLC9A6,APH1A,GYS1,KHDRBS1,SERP1,TNRC6A,TSHZ3,ZBTB4,ANKRD13C,MBNL1,P4HA1,CCDC97,SLC39A8,SLC2A14,C9orf86,GIT1,PURB,SMARCD1,SLC2A3,SP2,CSNK1G1,DULLARD,DICER1,SMYD4,MAF1,BRPF1
MicroRNA	miR-130a	miR-130a	PicTar	0.007299	161	525	ABCB7,ACVR1,AP1G1,SYNJ1,AMPD3,PAPD4,BTAF1,MAP3K14,ARHGAP1,DEDD,TMSB10,DYRK1B,ATP2A2,ATP6V1B2,BTG1,SLAIN1,ZNF282,CANX,CALM2,LSM14A,CPEB2,C1orf144,GGA1,CD69,HDAC4,ZEB2,SIRT7,CEBPE,G3BP2,CEP170,TOMM70A,VPS24,MAFB,NLK,WDR1,CLTC,CPD,CREBBP,DPP3,CNIH,SFRS11,VPS37B,SNIP1,DNMT1,DNM2,PLAA,ARID4B,E2F3,CMPK1,EP300,N4BP1,SLC25A44,EFNB2,BPTF,ACSL1,RALBP1,FASTK,PNPLA6,FBXO11,RASSF1,FLOT2,RAB35,IER3IP1,SUV420H1…
MicroRNA	miR-96	miR-96	PicTar	0.007522	179	594	ABCA2,SNAP23,CD164,ACVR1,SNX4,ADD3,MTMR3,ABCD1,STK19,INTS6,ANXA11,CNNM3,ARF1,PLOD3,ARHGDIA,TMSB10,SLC10A3,TBC1D22A,BCAT2,NIPBL,BCL2,ZFP36L1,RECK,CSDA,LSM14A,CBFA2T3,CASP2,EIF3J,NUMB,RWDD4A,VAMP8,CD47,MTSS1,SNX17,DAZAP2,FAM49B,CEP170,FAM116A,AP3S1,CRKL,PAIP2,DGCR2,PHF21A,FAM53C,MBNL2,NAMPT,TOPORS,REV1,ATG9A,DGKQ,DYNC1LI2,DIAPH2,DYRK1A,VPS26A,TSC22D3,CDC42BPB,ZAK,EP300,PPM1F,N4BP1,EFNB2,ARHGEF3,RAB…
MicroRNA	miR-301	miR-301	PicTar	0.00879	154	500	ABCB7,ACVR1,AP1G1,SYNJ1,AMPD3,PAPD4,BTAF1,MAP3K14,ARHGAP1,DEDD,TMSB10,DYRK1B,ATP2A2,ATP6V1B2,BTG1,SLAIN1,ZNF282,CANX,CALM2,LSM14A,C1orf144,CD69,ZEB2,SIRT7,CEBPE,G3BP2,CEP170,TOMM70A,VPS24,MAFB,NLK,WDR1,CLTC,CPD,DPP3,CNIH,SFRS11,VPS37B,SNIP1,DNMT1,DNM2,PLAA,ARID4B,E2F3,CMPK1,EP300,N4BP1,SLC25A44,EFNB2,BPTF,ACSL1,RALBP1,FASTK,PNPLA6,FBXO11,RASSF1,FLOT2,RAB35,IER3IP1,SUV420H1,ZFP91,TTYH3,TMED7,MID1I…
MicroRNA	miR-320	miR-320	PicTar	0.009982	129	407	ABCA2,SKAP2,DCP2,DAZAP1,ARF1,ZMYM4,RHOG,PCSK7,SLC10A3,CALD1,CALM3,UPF2,OGT,PPP1R16B,EIF3J,CDC42,CDC2L5,HDAC4,AZIN1,FAM49B,TOMM70A,SF3B14,CRKL,ARPC5,WAC,MEX3C,YTHDF3,CTNNB1,PLXNC1,CSNK1A1,DAB2,DBN1,TAOK2,DHX15,E2F3,CAB39,TSC22D3,RBM45,N4BP1,YWHAQ,MAN1A2,RNF34,FBXO11,VCPIP1,FTL,DHDDS,SUV420H1,ZFP91,STAG2,IPO7,GRB2,NR3C1,HNRNPH2,HNRNPF,HNRNPC,TNRC6A,RAP2C,MIER1,ANKRD13A,NDEL1,TMEM135,GPBP1,ST6GALNAC…
MicroRNA	miR-155	miR-155	PicTar	0.011673	71	198	ADD3,MAP3K14,ATP2B1,COPS3,SOCS1,CD47,CHCHD7,CTDSPL2,HDAC4,CEBPB,TOMM20,AZIN1,MAFB,COL7A1,CNIH,CSNK1A1,CSNK1G2,CAB39,IKBKE,CLINT1,N4BP1,EHD1,PAPOLA,FBXO11,ETS1,PSIP1,NDFIP1,SMNDC1,H3F3A,HIF1A,ARL5B,INPP5D,TSHZ3,HBP1,NUFIP2,KPNA4,ANTXR2,UBQLN2,STRN3,PELI1,SPRED1,PKIA,PLAG1,RCN2,C5orf41,RAB1A,RAB6A,RNF123,KIAA1267,SMARCA4,BCORL1,SLA,SGK3,FBXO33,SDCBP,ARL15,TLE4,UBE2W,SYPL1,CEP192,SP3,RAB11FIP2,YWHAZ…
MicroRNA	GCACTTT,MIR-106A	GCACTTT,MIR-106A	MSigDB	0.016352	167	555	C19orf2,GBF1,MTMR3,C14orf28,FBXL5,MAP3K14,ARHGAP1,DEDD,NCOA3,ASF1A,ULK1,BNIP2,CALD1,AHCTF1,JRKL,CCNG2,ATL3,CD69,RASSF2,UBE2J1,CTDSPL2,HDAC4,MLL4,ARHGEF11,PLEKHM1,DAZAP2,SERTAD2,RB1CC1,USP3,JOSD1,LASS6,DMTF1,WAC,MAP3K8,YTHDF3,UBR5,STX6,TOPORS,CRY2,DDX5,TAOK2,DYNC1LI2,ZNF362,DNM2,SLC4A7,ARID4B,E2F3,CMPK1,DYRK1A,VPS26A,EIF4G2,UBE3C,CEP57,ARHGEF3,MORF4L1,FASTK,PAPOLA,RAB10,TSPAN9,RAB11FIP1,AKAP13,ZNF…
MicroRNA	GCACTTT,MIR-20A	GCACTTT,MIR-20A	MSigDB	0.016352	167	555	C19orf2,GBF1,MTMR3,C14orf28,FBXL5,MAP3K14,ARHGAP1,DEDD,NCOA3,ASF1A,ULK1,BNIP2,CALD1,AHCTF1,JRKL,CCNG2,ATL3,CD69,RASSF2,UBE2J1,CTDSPL2,HDAC4,MLL4,ARHGEF11,PLEKHM1,DAZAP2,SERTAD2,RB1CC1,USP3,JOSD1,LASS6,DMTF1,WAC,MAP3K8,YTHDF3,UBR5,STX6,TOPORS,CRY2,DDX5,TAOK2,DYNC1LI2,ZNF362,DNM2,SLC4A7,ARID4B,E2F3,CMPK1,DYRK1A,VPS26A,EIF4G2,UBE3C,CEP57,ARHGEF3,MORF4L1,FASTK,PAPOLA,RAB10,TSPAN9,RAB11FIP1,AKAP13,ZNF…
MicroRNA	GCACTTT,MIR-519D	GCACTTT,MIR-519D	MSigDB	0.016352	167	555	C19orf2,GBF1,MTMR3,C14orf28,FBXL5,MAP3K14,ARHGAP1,DEDD,NCOA3,ASF1A,ULK1,BNIP2,CALD1,AHCTF1,JRKL,CCNG2,ATL3,CD69,RASSF2,UBE2J1,CTDSPL2,HDAC4,MLL4,ARHGEF11,PLEKHM1,DAZAP2,SERTAD2,RB1CC1,USP3,JOSD1,LASS6,DMTF1,WAC,MAP3K8,YTHDF3,UBR5,STX6,TOPORS,CRY2,DDX5,TAOK2,DYNC1LI2,ZNF362,DNM2,SLC4A7,ARID4B,E2F3,CMPK1,DYRK1A,VPS26A,EIF4G2,UBE3C,CEP57,ARHGEF3,MORF4L1,FASTK,PAPOLA,RAB10,TSPAN9,RAB11FIP1,AKAP13,ZNF…
MicroRNA	GCACTTT,MIR-106B	GCACTTT,MIR-106B	MSigDB	0.016352	167	555	C19orf2,GBF1,MTMR3,C14orf28,FBXL5,MAP3K14,ARHGAP1,DEDD,NCOA3,ASF1A,ULK1,BNIP2,CALD1,AHCTF1,JRKL,CCNG2,ATL3,CD69,RASSF2,UBE2J1,CTDSPL2,HDAC4,MLL4,ARHGEF11,PLEKHM1,DAZAP2,SERTAD2,RB1CC1,USP3,JOSD1,LASS6,DMTF1,WAC,MAP3K8,YTHDF3,UBR5,STX6,TOPORS,CRY2,DDX5,TAOK2,DYNC1LI2,ZNF362,DNM2,SLC4A7,ARID4B,E2F3,CMPK1,DYRK1A,VPS26A,EIF4G2,UBE3C,CEP57,ARHGEF3,MORF4L1,FASTK,PAPOLA,RAB10,TSPAN9,RAB11FIP1,AKAP13,ZNF…
MicroRNA	GCACTTT,MIR-20B	GCACTTT,MIR-20B	MSigDB	0.016352	167	555	C19orf2,GBF1,MTMR3,C14orf28,FBXL5,MAP3K14,ARHGAP1,DEDD,NCOA3,ASF1A,ULK1,BNIP2,CALD1,AHCTF1,JRKL,CCNG2,ATL3,CD69,RASSF2,UBE2J1,CTDSPL2,HDAC4,MLL4,ARHGEF11,PLEKHM1,DAZAP2,SERTAD2,RB1CC1,USP3,JOSD1,LASS6,DMTF1,WAC,MAP3K8,YTHDF3,UBR5,STX6,TOPORS,CRY2,DDX5,TAOK2,DYNC1LI2,ZNF362,DNM2,SLC4A7,ARID4B,E2F3,CMPK1,DYRK1A,VPS26A,EIF4G2,UBE3C,CEP57,ARHGEF3,MORF4L1,FASTK,PAPOLA,RAB10,TSPAN9,RAB11FIP1,AKAP13,ZNF…
MicroRNA	GCACTTT,MIR-17-5P	GCACTTT,MIR-17-5P	MSigDB	0.016352	167	555	C19orf2,GBF1,MTMR3,C14orf28,FBXL5,MAP3K14,ARHGAP1,DEDD,NCOA3,ASF1A,ULK1,BNIP2,CALD1,AHCTF1,JRKL,CCNG2,ATL3,CD69,RASSF2,UBE2J1,CTDSPL2,HDAC4,MLL4,ARHGEF11,PLEKHM1,DAZAP2,SERTAD2,RB1CC1,USP3,JOSD1,LASS6,DMTF1,WAC,MAP3K8,YTHDF3,UBR5,STX6,TOPORS,CRY2,DDX5,TAOK2,DYNC1LI2,ZNF362,DNM2,SLC4A7,ARID4B,E2F3,CMPK1,DYRK1A,VPS26A,EIF4G2,UBE3C,CEP57,ARHGEF3,MORF4L1,FASTK,PAPOLA,RAB10,TSPAN9,RAB11FIP1,AKAP13,ZNF…
MicroRNA	TGCCTTA,MIR-124A	TGCCTTA,MIR-124A	MSigDB	0.018524	156	514	ABCA2,IQGAP1,ABR,PLDN,RAB11A,CD164,SNX4,PARP1,AHR,ALCAM,ANGPT1,ANXA11,ANXA7,ARHGDIA,RHOG,USP14,ATP7A,TMEM184B,PTTG1IP,GNPDA2,CASC4,CAPN2,SLC25A20,OGT,ELOVL5,GGA1,CCDC28A,RWDD4A,CHMP2B,HDAC4,NCKIPSD,KIAA0174,BRP44L,AMMECR1,GLTP,ROD1,ARPC5,SCAMP2,CSTF3,MAPK14,TMEM109,PCYOX1,VPS37B,SNIP1,DYNC1LI2,DIAPH2,SLC4A7,ROCK2,LITAF,DUSP6,PPM1F,FAM53B,EFNB2,ACSL1,RAB10,ERF,ETF1,EXTL3,ETS1,FLOT2,TMED1,SH3BP5L,D…
MicroRNA	miR-142-5p	miR-142-5p	PicTar	0.018653	101	308	AP1G1,AHR,SYNJ1,FBXL3,RPS6KA4,RHOA,ATP2B1,ZFAND3,ULK1,BTG1,SLAIN1,BNIP2,CUL4A,CUL2,CPEB2,SCOC,BECN1,CCNG2,CDK5,TIPARP,CD69,MBIP,TSC22D2,NAMPT,TAOK2,UBE4A,MAP4K4,ARID4B,EP300,MED28,WWP1,SYNCRIP,CAP1,CMIP,SUV420H1,BASP1,TTYH3,APBB3,MSH6,HDAC2,EXOC5,H3F3A,GRSF1,HNRNPL,ATXN7L2,MAT2B,NETO2,JUP,ALS2,TMEM49,TSHZ3,CBX3,LMNB1,ZNF512B,CNOT6,CYP20A1,MTPN,MCL1,MKLN1,HIAT1,CXCR7,PCBP1,PCBP2,FAM129B,NFE2L2,PPP…
MicroRNA	TCCAGAT,MIR-516-5P	TCCAGAT,MIR-516-5P	MSigDB	0.021505	42	103	ACACA,SPAG9,ATP2A2,ZNF282,NCOA1,TLK1,CLK1,CRYZL1,ARL6IP4,RBM12,RASGRP2,DDX3X,DBN1,RALBP1,GMFB,NCOA7,MID1IP1,STAG2,NR3C1,ATXN7L2,RAB1B,MIER1,SNX27,OAF,MNT,C1orf63,MYLK,PLAGL2,RAP1B,LRRC8A,SFRS5,ATXN1,FBXO33,ASXL2,VAMP2,ARL8B,CEP192,STAT3,ARGLU1,RAB11FIP2,RYBP,KIAA0240
MicroRNA	miR-93	miR-93	PicTar	0.022344	173	581	RAB11A,C19orf2,GBF1,MTMR3,FBXL5,INTS6,MAP3K14,ARHGAP1,DEDD,NCOA3,ASF1A,BCL6,ULK1,BTG1,BNIP2,JRKL,CCNG2,ZNF385A,ATL3,CD69,RASSF2,UBE2J1,CTDSPL2,HDAC4,MLL4,ARHGEF11,PLEKHM1,DAZAP2,RB1CC1,USP3,BRP44L,JOSD1,LASS6,DMTF1,WAC,SCAMP2,MAP3K8,YTHDF3,MBNL2,C19orf43,UBR5,TMUB2,TOPORS,CRY2,DDX5,DHX40,TAOK2,CLIP4,DYNC1LI2,DNM2,FBXO31,ECT2,ARID4B,E2F3,CMPK1,DYRK1A,VPS26A,CEP57,ARHGEF3,MORF4L1,FASTK,PAPOLA,RAB10…
MicroRNA	miR-186	miR-186	PicTar	0.024061	137	444	SUCLA2,ADAM10,EED,SKAP2,DCP2,ATP2A2,ZFAND3,PRDM1,HECTD1,ZFP36L1,ULK1,BTF3,CAPZA1,CAST,CAPZA2,ZZZ3,SENP6,ANKRD17,CPEB2,CAV2,EIF3A,SCOC,ZNF385A,CDC42,LRBA,CDC5L,ZFYVE16,MTSS1,MATR3,ZEB2,RB1CC1,PTPLB,G3BP2,MAFB,CLK3,CREBBP,ACTR3,PHF21A,YTHDF3,MBNL2,CTSB,PSME3,SCAMP1,DPP4,EP300,ELF4,EXT2,PDCD10,MRPL3,C5orf24,CEPT1,GOLGA7,METTL9,SUV420H1,TMED7,STAG2,PTGES3,KHDRBS1,HNRNPF,MOSPD2,MIER1,MARCKS,SNX27,INTS…
MicroRNA	miR-141	miR-141	PicTar	0.025826	108	336	SNAP23,RAB11A,SPAG9,ATP2A2,ATP6V1B2,BAP1,CASC4,OGT,CDC42,CDC2L5,CD47,MTSS1,MATR3,HDAC4,ZC3HC1,PPHLN1,ZEB2,RB1CC1,G3BP2,YPEL5,ZFR,CPD,ARPC5,PHF21A,CTNNA1,YTHDF3,CTNNB1,NAMPT,FRY,RBM7,CSNK1A1,DDX5,E2F3,DR1,CDC42BPB,STX2,GLRX,LYPLA1,PGRMC2,UBE4B,PTGES3,EXOC5,H2AFZ,STXBP5,GRB2,PDCD4,HNRNPF,KPNA3,RAP2C,TSHZ3,GABARAPL2,SNX27,KPNA4,TMEM135,ASXL1,ARHGAP24,MBNL1,MTPN,JAZF1,HIAT1,YTHDC1,SPRED1,PRKACB,PPP3R…
MicroRNA	GGGCATT,MIR-365	GGGCATT,MIR-365	MSigDB	0.028247	42	104	ACVR1,ADD3,ADM,SYNJ1,ARRB2,PRDM1,ANKRD17,HDAC4,ARMCX3,G3BP2,AMMECR1,COL7A1,RBM12,CSK,ESRRA,KIAA2026,ETS1,FAM91A1,HMGCR,RAB1B,PHF12,NUFIP2,ARRDC2,LAMP2,RAB22A,MYLK,PCNP,MAP2K7,REV3L,C18orf25,SGK3,ING3,SNRK,YWHAH,EIF4E3,PHF15,ZNF644,USP48,ST8SIA4,DCUN1D5,UBAC2,ANKRD28
MicroRNA	TTTGTAG,MIR-520D	TTTGTAG,MIR-520D	MSigDB	0.028973	101	311	ACACA,ADD1,PRPF4B,DCP2,ATF4,MTA1,ATP2A2,ATP2B1,PRDM1,NIPBL,CBX4,ZZZ3,CPEB2,PPM1D,EIF3A,LRBA,TIPARP,MTSS1,CTDSPL2,HDAC4,SERTAD2,CLNS1A,RCE1,HNRPDL,WASF2,CSTF3,MBNL2,UBR5,CDC42BPB,ELF1,EIF4G2,BZW1,UBE3C,FAM53B,HNRNPA0,ETS1,VCPIP1,FNTA,GNL1,NDFIP1,H3F3A,DDX17,STXBP5,PDCD4,JMJD1C,MIER1,CBX3,NDEL1,LRCH4,LPP,JAZF1,BAZ2B,UBQLN2,ABHD3,PDCL,LYSMD2,TBC1D15,PCNP,NEDD9,PPP1CB,POLR2B,TMEM55A,PPP3CA,PPP2CA,PDE…
MicroRNA	miR-372	miR-372	PicTar	0.030125	180	611	RAB11A,C19orf2,GBF1,MTMR3,FBXL5,INTS6,MAP3K14,ARHGAP1,DEDD,NCOA3,ASF1A,BCL6,ULK1,BTG1,BNIP2,CALD1,JRKL,CCNG2,ZNF385A,ATL3,TIPARP,CD69,RASSF2,UBE2J1,CTDSPL2,HDAC4,MLL4,ARHGEF11,PLEKHM1,DAZAP2,RB1CC1,USP3,BRP44L,JOSD1,LASS6,DMTF1,WAC,MAP3K8,YTHDF3,MBNL2,C19orf43,UBR5,TMUB2,TOPORS,CRY2,DDX5,DHX40,TAOK2,CLIP4,DYNC1LI2,ZNF362,DNM2,FBXO31,ECT2,ARID4B,E2F3,CMPK1,DYRK1A,VPS26A,CEP57,ARHGEF3,MORF4L1,FASTK…
MicroRNA	TGAATGT,MIR-181B	TGAATGT,MIR-181B	MSigDB	0.030591	142	465	CCNK,RAB11A,EED,RNMT,ADM,WSB1,AP1G1,GAPVD1,PER2,ARL5A,ATP2A2,ATP2B1,PICALM,NIPBL,ZFP36L1,LARP4,NSMAF,RECK,CBX4,CGGBP1,OGT,CBFA2T3,CD4,SCOC,LRBA,KIAA0195,BCLAF1,C14orf129,KIAA0528,DAZAP2,TSC22D2,G3BP2,NLK,CPD,ROD1,MEX3C,ZNF655,YTHDF3,MBNL2,CSNK1G3,DDX3X,DYNC1LI2,NMT2,CDYL,ATG5,NPEPPS,TBPL1,EIF4A2,UBE3C,ACSL1,SENP2,EPS15,ETF1,RNF34,FBXO11,ETS1,BAIAP2,SLC9A6,NAT5,PHF20L1,CAMSAP1,TMED5,STAG1,IVNS1ABP…
MicroRNA	TGAATGT,MIR-181D	TGAATGT,MIR-181D	MSigDB	0.030591	142	465	CCNK,RAB11A,EED,RNMT,ADM,WSB1,AP1G1,GAPVD1,PER2,ARL5A,ATP2A2,ATP2B1,PICALM,NIPBL,ZFP36L1,LARP4,NSMAF,RECK,CBX4,CGGBP1,OGT,CBFA2T3,CD4,SCOC,LRBA,KIAA0195,BCLAF1,C14orf129,KIAA0528,DAZAP2,TSC22D2,G3BP2,NLK,CPD,ROD1,MEX3C,ZNF655,YTHDF3,MBNL2,CSNK1G3,DDX3X,DYNC1LI2,NMT2,CDYL,ATG5,NPEPPS,TBPL1,EIF4A2,UBE3C,ACSL1,SENP2,EPS15,ETF1,RNF34,FBXO11,ETS1,BAIAP2,SLC9A6,NAT5,PHF20L1,CAMSAP1,TMED5,STAG1,IVNS1ABP…
MicroRNA	TGAATGT,MIR-181C	TGAATGT,MIR-181C	MSigDB	0.030591	142	465	CCNK,RAB11A,EED,RNMT,ADM,WSB1,AP1G1,GAPVD1,PER2,ARL5A,ATP2A2,ATP2B1,PICALM,NIPBL,ZFP36L1,LARP4,NSMAF,RECK,CBX4,CGGBP1,OGT,CBFA2T3,CD4,SCOC,LRBA,KIAA0195,BCLAF1,C14orf129,KIAA0528,DAZAP2,TSC22D2,G3BP2,NLK,CPD,ROD1,MEX3C,ZNF655,YTHDF3,MBNL2,CSNK1G3,DDX3X,DYNC1LI2,NMT2,CDYL,ATG5,NPEPPS,TBPL1,EIF4A2,UBE3C,ACSL1,SENP2,EPS15,ETF1,RNF34,FBXO11,ETS1,BAIAP2,SLC9A6,NAT5,PHF20L1,CAMSAP1,TMED5,STAG1,IVNS1ABP…
MicroRNA	TGAATGT,MIR-181A	TGAATGT,MIR-181A	MSigDB	0.030591	142	465	CCNK,RAB11A,EED,RNMT,ADM,WSB1,AP1G1,GAPVD1,PER2,ARL5A,ATP2A2,ATP2B1,PICALM,NIPBL,ZFP36L1,LARP4,NSMAF,RECK,CBX4,CGGBP1,OGT,CBFA2T3,CD4,SCOC,LRBA,KIAA0195,BCLAF1,C14orf129,KIAA0528,DAZAP2,TSC22D2,G3BP2,NLK,CPD,ROD1,MEX3C,ZNF655,YTHDF3,MBNL2,CSNK1G3,DDX3X,DYNC1LI2,NMT2,CDYL,ATG5,NPEPPS,TBPL1,EIF4A2,UBE3C,ACSL1,SENP2,EPS15,ETF1,RNF34,FBXO11,ETS1,BAIAP2,SLC9A6,NAT5,PHF20L1,CAMSAP1,TMED5,STAG1,IVNS1ABP…
MicroRNA	GTGCCAT,MIR-183	GTGCCAT,MIR-183	MSigDB	0.032334	60	165	AMD1,PPP1R14B,MTMR6,BTG1,NCK2,BNIP3L,OGT,YPEL5,DGCR2,CSNK1G3,RNF138,SFRS11,RAB8B,BZW1,TMED7,SLC35A1,NR3C1,PDCD4,SERP1,EIF2C2,CTDSP1,ITGB1,ANKRD13C,ARHGAP21,GATAD2B,MBNL1,MAP3K4,PAM,SCYL3,PLEKHA3,PPP2CA,PPP2CB,PDE4D,PLAG1,PLAGL2,ZDHHC6,RCN2,RALA,PTPN4,SPOPL,SFRS2,ING3,TLE4,TMSB4X,TMPO,TCF12,LPHN1,VPS37A,FCHO2,TPM1,PHF15,CSNK1G1,ARHGEF18,SLC44A1,TRAM1,OSBPL8,KIAA0182,ARFGAP2,RAB11FIP4,L3MBTL3
MicroRNA	GGCACTT,MIR-519E	GGCACTT,MIR-519E	MSigDB	0.032734	47	121	C19orf2,BNIP2,CDK10,CCNG2,ZNF385A,CTDSPL2,DAZAP2,SERTAD2,WAC,FAM53C,UBR5,DDX3X,ARID4B,VPS26A,MARK2,UBE3C,CORO7,RAB35,ZFP91,MGEA5,MAT2B,ZBTB4,GATAD2B,PPA2,EIF5A2,C1GALT1,FURIN,MYLK,BTBD7,PLAGL2,PHF1,RBL2,ARID4A,PTEN,XRN1,C18orf25,SON,MKRN1,TBL1X,MAP3K7,SRPK1,FOXJ3,BICD2,DCUN1D3,TNRC6B,ZNF148,KIAA0922
MicroRNA	AGCATTA,MIR-155	AGCATTA,MIR-155	MSigDB	0.044697	49	129	MAP3K14,ATP2B1,PICALM,SOCS1,CD47,HDAC4,CEBPB,TOMM20,G3BP2,CSNK1G2,CAB39,IKBKE,N4BP1,FBXO11,ETS1,PSIP1,NDFIP1,H3F3A,HIF1A,ARL5B,INPP5D,HBP1,NUFIP2,ANTXR2,STRN3,NFIX,PKIA,ARID2,RCN2,BCAP29,C5orf41,RAB1A,RAB6A,RNF123,SMARCA4,BCORL1,SLA,SGK3,FBXO33,SDCBP,TLE4,UBE2W,SYPL1,SP3,SPI1,RAB11FIP2,YWHAZ,YWHAE,UBE2D3
DRUGS
Drug	D014810	Vitamin E	CTD	0	463	1453	TRIM24,AAMP,TRPM6,BANF1,IQGAP1,ACADS,ACTB,TNFSF10,ACTN4,ADD1,ADD3,PARP1,SKAP2,CPNE1,AP2A2,AKT1,AHR,SYNJ2,CDC16,AKR1B1,CFLAR,ALDOA,BIN1,AMY2A,ANGPT1,INTS6,SLC25A4,BIRC2,ARAF,ARF5,ARHGDIA,DEDD,RHOG,PCSK7,FIBP,ATP5C1,ATP5B,DNAJA3,BAP1,ZNF324,ARIH1,DGCR14,NIPBL,USP9X,YIPF3,BCL2,BCL6,BRMS1,LTBP4,MRPL49,CSDA,CAPNS1,CALD1,CALM3,CALR,CDK10,PRPF18,SMARCA5,FAM127B,CUL4A,RANBP3,CAT,ABHD14A,C20orf117,RCHY1,C…
Drug	D020122	tert-Butylhydroperoxide	CTD	0	440	1404	CCNK,SAP30,ABR,ACADS,SNAP23,ACTB,TNFSF10,ACTN1,ADAR,ADAM8,SNX4,MBTPS1,ADD3,AP3D1,PARP1,ADM,CPNE1,AES,KIAA1279,SPHK1,SYNJ2,ABCD1,FUBP1,CDC16,ALDOA,ALOX5,AMPD3,PAPSS2,PAPSS1,AIP,APAF1,ANPEP,CNNM3,H1FX,ARHGDIA,DDX21,TMSB10,FIBP,ATP2A2,ATP2B1,BAD,TBC1D22A,ATP6V1A,MKKS,PGLS,LSM4,DGCR14,PRDX5,USP9X,BCL2,BTG1,BTF3,STK24,STX7,NSMAF,C5,DAK,CSDA,CAST,CAPN2,CAPNS1,CALM1,KCNAB2,CALM3,CALR,CDK10,OGT,CUL4A,TPS…
Drug	D018038	Sodium Selenite	CTD	0	378	1188	TRIM24,RPL10L,ABCF1,SNAP23,ACTB,TNFSF10,TNFRSF25,TRADD,ADD1,TOP3B,PARP1,ADSL,AGA,CCDC69,TRPC4AP,AKT1,PER2,SYNJ1,FBXL5,ABCD1,SPAG9,ANXA11,ANXA7,AIP,ANXA1,FAM98C,MAP3K14,BIRC2,ARF5,APRT,ZMYM6,RPUSD1,ARHGEF1,AIFM1,F8A1,ATP5F1,AXIN1,CLPP,GTPBP6,PRDX5,BCL2,ZFP36L2,C11orf2,ADAT3,PTTG1IP,COPS3,CAMLG,ZZZ3,CALM1,ACOT11,GPR65,CCNC,C10orf137,CAT,PPM1D,SCARB1,NUMB,CD14,CCNG1,VAMP4,CDK4,CDK5,CDC42,SKAP1,CD47,…
Drug	D002995	Clofibric Acid	CTD	0	234	666	SUCLA2,NAT1,BANF1,ACADM,ACOX1,PARP1,ADSL,ADSS,AHR,ABCD1,CDC16,ALDOA,ALPL,PAPSS2,ANXA2,APRT,DDX21,TMSB10,ATF4,PICALM,ATP5O,PRDX5,BCAT2,BTF3,PTTG1IP,CALM2,CALR,CAD,CPEB2,HACL1,CASP4,SCARB1,CD14,CCNH,CCNG1,CDK4,NIPSNAP3A,CD47,PPAP2B,HIGD2A,TMEM14C,CDKN1B,TOMM20,KEAP1,CCS,CLNS1A,VRK3,COX7A2,CRIP2,CPT2,THOC1,ABCF2,CTNNB1,LRPPRC,TRAP1,CTSB,CS,DDOST,TBRG4,DARS,WDR46,NDUFS7,RPL23,DYNC1LI2,PLAA,DLD,CYB5R3…
Drug	C099555	CD 437	CTD	0	94	196	BANF1,AKR1B1,ALDOA,ARF1,ARSA,ARL2,ARHGDIB,TMSB10,ATP5C1,ATP5B,ATP5A1,ATP6V0C,ATP5J,ATP5O,CDK4,KIAA0101,TMEM14C,CEBPB,AP2M1,AP2S1,RBX1,CLIC1,COX7B,COX7A2,COX6C,ARPC2,ARPC3,ITM2B,PSMF1,EIF4A2,EIF4B,EEF2,PNPLA6,RPL35,FTH1,CORO1A,WDR45,FLT3LG,TOPBP1,SAP18,ATP5L,STXBP5,ARL6IP5,PRDX4,LSM3,HSP90AA1,DNAJA1,HMGB1,KPNA2,PABPC1,MEN1,PCBP1,PCBP2,SH3BGRL3,NACA,NARS,NDUFS5,SLC30A5,NFKBIA,NME1,PFN1,SLC25A3,PHYH…
Drug	CID000000762	guanosine triphosphate	Stitch	0	297	926	NAT1,IQGAP1,ABR,RNGTT,ADORA2A,ADSL,ADSS,AP1B1,AP2A2,AP2A1,AP1G1,AKT1,AMPD3,ANGPT1,TAF1B,ARF1,ARRB1,ARHGAP1,ARHGDIB,ARHGDIA,RHOA,RHOG,ARHGEF1,BCL6,CALM2,CALM1,CALM3,KRIT1,EIF3J,EIF3H,EIF3A,EIF3B,RPL36,CCNT1,CCNH,VAMP8,COBRA1,CDC42,LYST,STT3B,PSMD6,TBCB,CLTC,GLTP,SCAMP3,DNM1L,COPB1,NUP37,PREB,DNAL4,RASGRP2,CSNK1G3,CSNK2A2,GNG8,CSK,CSNK1D,CSNK1A1,CSNK1G2,CSNK1E,DAD1,DBP,COPB2,GTF3C5,GTF3C3,SLC25A22,…
Drug	CID000000730	guanosine diphosphate	Stitch	0	214	651	ABR,RAB11A,RNGTT,ADSL,ADSS,AP1B1,AP2A2,AP2A1,AP1G1,AKT1,ANGPT1,ARF1,ARRB1,ARHGAP1,ARHGDIB,ARHGDIA,RHOA,RHOG,ARHGEF1,DGCR14,KRIT1,PNPT1,EIF3J,EIF3H,ENTPD6,EIF3A,EIF3B,RPL36,CCNH,VAMP8,CDC42,LYST,CHM,STT3B,PSMD6,CLTC,ACOT8,SCAMP3,DNM1L,COPB1,MITD1,PREB,DNAL4,RASGRP2,GNG8,DAD1,COPB2,RPL23,DNM2,EEF1A1,ECT2,EIF4A2,EIF4B,EEF2,EEF1D,EEF1B2,ARHGEF3,RHOT2,FAU,PTK2B,RAB40B,RALBP1,GNB4,ERCC3,ETF1,RRM2B,F2R,…
Drug	D007657	Ketone Bodies	CTD	0	166	480	ACACA,ACADM,ACTB,SNX4,SKAP2,AGA,AP2A2,ARL5A,ALDOA,TSC22D1,ASH2L,SLC25A4,ARF1,ARAF,RHOG,ATP5C1,ATP5B,ATP2A2,ATP5D,ATP5F1,ATP6V1E1,ATP6AP1,ATP5O,ZFP36L1,BNIP3L,BOK,ELOVL5,CARS,NCOA1,CD9,DGAT1,BECN1,SYF2,CLIC4,TOMM20,FAM49B,PJA2,CKB,BRP44L,AP2M1,AP2S1,CLK1,CLTC,GLTP,MED16,ACTR3,TSSC4,DNM1L,ARL6IP4,ARFRP1,CTSB,ACTR1A,POMP,MAPK14,CRY2,DDX5,DDX1,CYC1,LONP1,PLAA,ZRANB2,CRIPT,DHX15,MAGED1,ACSL3,ACSL1,FDF…
Drug	D015741	Metribolone	CTD	1e-06	125	339	SUCLA2,ACTB,ACTG1,HERC3,AKT1,ALDH9A1,PHGDH,ALDOA,AIP,ARHGAP1,B2M,NCOA3,BRMS1,MAD1L1,CASC4,CANX,CAPZA1,ELAC2,NCOA1,UBE2J1,PPHLN1,ERGIC3,PSMD6,CKB,AP2M1,CLTC,PDCD6IP,CREBBP,CTNNB1,TRIM28,CTSD,CTSB,C1orf116,PSME3,CSNK1A1,DDX5,DDX1,DARS,COPB2,PRDX6,ENO2,EEF2,ACSL3,STIP1,FDFT1,MED28,PRDX3,RUVBL2,SDCCAG3,EWSR1,STARD10,FTH1,G6PD,SEC23A,RDH11,GNAI3,GLOD4,ABCC4,SLC35C2,APPBP2,GSS,HYOU1,HSD17B4,LSM1,HSP90A…
Drug	D004052	Diethylnitrosamine	CTD	1e-06	186	560	SUCLA2,BANF1,ACADM,ACOX1,PARP1,ADSL,ABCD1,ALDOA,ALPL,ANGPT1,PAPSS2,APRT,DDX21,TMSB10,ATF4,ATP1B3,PICALM,ATP5O,BCAT2,BCL2,BTF3,CALM2,CALR,CAD,CPEB2,CASP4,CAT,SCARB1,CD14,CCNH,CCNG1,CDK4,NIPSNAP3A,CD47,PPAP2B,HIGD2A,CDKN1B,KEAP1,CCS,CLNS1A,VRK3,COX7A2,ABCF2,TRAP1,CTSB,TBRG4,DAD1,WDR46,DYNC1LI2,PLAA,EEF1E1,DPYD,DPP4,KCTD6,ENG,ERP29,PUS1,ERCC3,SYCP3,ZMYND11,WDR6,CDC37,POLR3A,FAM89A,WDR5,DCAKD,INSIG2,…
Drug	C005460	uranyl acetate	CTD	1.3e-05	88	224	ACTB,ADAR,RNGTT,PRPF4B,RHOA,B2M,ATP6V1A,BCL2,BTF3,CANX,COPS3,CALM2,AASDHPPT,CUL2,APPL1,TOMM20,TLK1,PDCD6IP,ACTR2,PDCD7,VPS13B,ABCF2,YTHDF3,TRIM28,NAMPT,DGKA,WDR59,EEF1A1,SCAMP1,CLINT1,METAP2,YWHAQ,EPS15,IQGAP2,RMI1,FUT8,GLO1,SEC24B,NDFIP1,SRRM1,DNAJA2,NCOA7,PTGES3,TGOLN2,IPO7,GRB2,HSPA1A,HMGB1,MAT2B,ID2,KPNA3,INSIG1,HBP1,MARCKS,LDHA,LAMP2,MDH2,NAP1L1,NARS,PPP2CA,PIK3R1,MCFD2,RDX,WSB2,RAN,RPL15,PT…
Drug	C014707	nitrosobenzylmethylamine	CTD	6.8e-05	171	532	NAT1,ABCA2,ACTB,RAB11A,SYNJ2,ALCAM,PHGDH,ALOX5,ANGPT1,ANXA3,ANXA1,ANXA2,ATP6V0E1,OSTF1,ARG1,AQP9,TMSB10,ASCL2,ATF4,USP14,ATP2A2,ATP1B3,B2M,ATP6V1B2,BCAT2,TSPO,AGPS,CALM3,HAT1,AKR7A2,DGAT1,CCNG1,CDC42,CD47,CD44,CEBPB,PSMD6,TOMM70A,CKB,VPS24,USP15,CLIC1,ACSL5,CLTC,ROD1,ACTR2,ARFRP1,CTSD,CS,GNG8,TXNDC9,DDX5,PLAA,DHCR7,ITM2B,DECR1,ECE1,GMFG,DUSP6,TSC22D3,BZW1,TMED10,STIP1,FDFT1,SUB1,COQ10B,FBXO11,F2R…
Drug	C472791	3-(4'-hydroxy-3'-adamantylbiphenyl-4-yl)acrylic acid	CTD	7.2e-05	183	578	BANF1,IQGAP1,ACTB,AKR1B1,CFLAR,ALOX5,APAF1,NFS1,ARF1,ARSA,TMSB10,ATP5B,ATP5A1,ATP5J,ATP6V1A,UNC84B,GCA,ULK1,BTG1,SLAIN1,NSMAF,HIST1H2AC,PQLC3,CANX,CAD,SMARCA5,PPM1D,SCOC,CCNG1,VAMP8,CDK4,CD47,PPAP2B,KIAA0101,RASSF2,MLL4,TMEM14C,CEBPB,PIGT,AP2M1,AP2S1,RBX1,KBTBD11,CLK1,CLIC1,CRYZL1,COX7B,COX7A2,COX6C,PDCD6IP,ARPC2,COL7A1,ARPC3,COX5B,WASF2,MBNL2,C19orf43,RASGRP2,RNF26,REV1,CCPG1,DAPK3,DAB2,CD55,DGK…
Drug	D011441	Propylthiouracil	CTD	0.000119	126	368	CES2,ACACA,ADAM15,FDX1L,ADD1,CCNA1,AMY2A,ARG1,ASGR2,AIFM1,ATP6V1A,GTF2H5,CLPP,BTG1,BTF3,PTTG1IP,DAK,CSDA,AKR7A2,DGAT1,CCNH,AP2M1,CLCN7,COX4I1,CTNNA1,SLC25A13,CSRP1,CSK,CSNK1A1,RPL23,DNMT1,DECR1,CMPK1,COQ3,PRDX6,DPYD,DPP4,EIF4A2,ERP29,FDFT1,RNPS1,ESD,ETFB,FAAH,KATNA1,PECI,COPS4,GNB2L1,CEPT1,ST3GAL6,PGCP,MRPL2,GAPDH,GAMT,TMED7,GCHFR,GBE1,HBB,HAL,GRB2,GRINA,NR3C1,HSD17B4,HPRT1,HMGN1,TMEM97,ID2,LRP3,…
Drug	D002994	Clofibrate	CTD	0.000135	128	376	CES2,ACACA,ACADM,ACLY,ACOX1,ADAM15,FDX1L,ADD1,AHR,TSC22D1,ARG1,ASGR2,ATP6V1A,GTF2H5,CLPP,BTF3,PTTG1IP,DAK,AKR7A2,CAT,CD36,SCARB1,DGAT1,CCNG1,AP2M1,COX4I1,CTNNA1,SLC25A13,CSRP1,CSNK1D,RPL23,DECR1,CMPK1,COQ3,PRDX6,DPYD,DPP4,EIF4A2,CCNI,ERP29,FDFT1,RNPS1,ESD,ETFDH,ETFB,FAAH,PECI,MCRS1,COPS4,CEPT1,ST3GAL6,PGCP,MRPL2,GAPDH,GAMT,TMED7,GCHFR,GBE1,HBB,HAL,TGOLN2,GRINA,NR3C1,HSD17B4,HPRT1,HMGCR,HMGN1,TMEM…
Drug	CID000023989	uranium	Stitch	0.000177	93	252	PRPF31,PRPF4B,SNURF,LSM4,ZFP36L2,SYF2,RTCD1,DHX38,CENPB,DDX46,LSM8,DDX47,CRLF3,CS,DDX23,NPEPPS,TBPL1,SF3A3,MORF4L1,FES,PAPOLA,ERF,RPP40,POP4,PTP4A3,HSPA14,GNAI3,PGCP,Magmas,POP7,SNAPC5,GTF2B,GTF2A2,GTF3C1,BRF1,GTF3A,RBBP9,PRPF8,LSM1,LSM3,HSPA4,HPRT1,HNRNPC,PRPF19,LSM2,CHD8,MSH3,XAB2,NARS,NCL,DSE,TUT1,POU2F1,POLR2L,POLR2C,POLR2F,POLD1,POLE,POLR2A,POLR2B,RAB43,PLRG1,POLR3B,EAF2,LRSAM1,DCPS,PSMA1,PT…
Drug	D001553	Benzbromarone	CTD	0.000361	100	280	CES2,ACACA,ADAM15,FDX1L,ADD1,ARG1,ASGR2,ATP6V1A,GTF2H5,CLPP,BTF3,PTTG1IP,DAK,AKR7A2,DGAT1,AP2M1,COX4I1,CTNNA1,SLC25A13,CSRP1,RPL23,DECR1,CMPK1,COQ3,PRDX6,DPYD,DPP4,EIF4A2,ERP29,FDFT1,RNPS1,ESD,ETFB,FAAH,PECI,COPS4,CEPT1,ST3GAL6,PGCP,MRPL2,GAPDH,GAMT,TMED7,GCHFR,GBE1,HBB,HAL,GRINA,NR3C1,HSD17B4,HPRT1,HMGN1,TMEM97,LRP3,OAF,MAN2B1,OGDH,NAP1L1,NDUFS5,NFX1,SLC39A8,MAP2K2,SLC25A3,PHYH,BMF,CISD1,RPL11,R…
Drug	D005001	Ethionine	CTD	0.000442	100	281	CES2,ACACA,ADAM15,FDX1L,ADD1,ARG1,ASGR2,ATP6V1A,GTF2H5,CLPP,BTF3,PTTG1IP,DAK,AKR7A2,DGAT1,AP2M1,COX4I1,CTNNA1,SLC25A13,CSRP1,RPL23,DECR1,CMPK1,COQ3,PRDX6,DPYD,DPP4,EIF4A2,ERP29,FDFT1,RNPS1,ESD,ETFB,FAAH,PECI,COPS4,CEPT1,ST3GAL6,PGCP,MRPL2,GAPDH,GAMT,TMED7,GCHFR,GBE1,HBB,HAL,GRINA,NR3C1,HSD17B4,HPRT1,HMGN1,TMEM97,LRP3,OAF,MAN2B1,OGDH,NAP1L1,NDUFS5,NFX1,SLC39A8,MAP2K2,SLC25A3,PHYH,BMF,CISD1,RPL11,R…
Drug	C017947	sodium arsenite	CTD	0.001383	253	877	TRIM24,NAT1,CES2,ACTB,TNFSF10,PARP1,PRPF4B,AKT1,AHR,CDC16,CFLAR,ALDOA,ALOX5AP,ANXA1,ANXA2,BIRC2,ARHGDIB,ARHGDIA,ATM,ATF4,USP8,DNAJA3,ATP1B3,NRIP1,BCL2,BCL6,BRMS1,PIP5K1B,ZFP36L1,BTG1,HIST1H2AC,CSDA,CAPZA1,CAST,CAPN2,CAPNS1,IKBKG,CALM1,CALR,CCNC,CAV2,CASP1,CASP2,CAT,CD40LG,BECN1,CCNG1,CCND3,CDK4,CDC25B,CD69,CD74,CHUK,CEBPB,KEAP1,CKB,CLK1,PIGK,TANK,CREBBP,DPP3,MAP3K8,CTNNB1,TRAP1,MAPK14,CSNK2A2,CSN…
Drug	C025643	vinclozolin	CTD	0.001644	344	1250	IQGAP1,ACACA,ACTB,ADAM8,ADD1,SNX4,ADD3,FUBP3,AP3D1,SKAP2,GAPVD1,AGER,SYNJ2,ALDH9A1,FAM101B,ALAS2,FUBP1,CFLAR,ALOX5AP,ANGPT1,ANPEP,ANXA1,ANXA2,TRIM23,AQP9,ARHGAP1,ARHGDIB,MTA1,ATP2A2,ATP2B1,ATP6V1B2,ATP6V1A,HECTD1,USP11,NIPBL,ZFP36L1,TAGLN2,LTBP4,SDPR,TSPO,PQLC3,CANX,CSDA,NELF,IBTK,CALR,CAD,SMARCA5,PPFIA1,CAV2,CBFA2T3,CASP1,NEK7,TOR1AIP1,CD40LG,AHCTF1,SCOC,VAMP8,CCND3,CDH11,TIPARP,CDC2L5,CD74,CD47…
Drug	CID000004122	nocodazole	Stitch	0.001745	151	478	IQGAP1,ACTB,TNFSF10,ACTG1,RAB11A,MBTPS1,GBF1,PRPF4B,CCNA1,AKT1,CDC16,ARF1,ARHGAP4,RHOA,BUB3,RHOG,BCL2,STX7,MAD1L1,CALM2,CALM1,CALM3,KRIT1,OGT,PPP1R16B,APPL1,EIF3A,CDC23,CDK4,CDK5,CDC42,CDC2L5,USO1,RB1CC1,USP15,CLTC,HDAC6,NT5C3,COPB1,CTBP2,CTNNB1,G3BP1,MIS12,CTSD,ACTR1A,ACTR1B,PSMD14,DCTN1,TAOK2,CYB5R3,ROCK2,ECT2,H2AFY,SEC22B,DRG2,CEP57,PTK2B,EPS15,ETFA,RASSF1,GLMN,NIN,GLG1,ZER1,TUBE1,SYNCRIP,COG5…
Drug	D013876	Thiophenes	CTD	0.002214	34	68	TNFSF10,ADD3,FUBP3,ANXA1,ANXA2,BIRC2,NMI,MAD1L1,EIF3B,CDKN1B,COL9A2,ITM2B,DEFA1,ELF4,PTK2B,RUVBL2,PECI,PRMT1,LAMP2,NTHL1,MYC,MYH9,PPM1G,PPP3CA,REL,RARA,RB1,ABCE1,RABGGTB,STK10,STAT1,WIPF1,WAS,UBE3A
Drug	D013853	Thioacetamide	CTD	0.003455	150	479	CES2,ACACA,ACTB,ADAM15,FDX1L,ADD1,ADORA2A,ALPL,TSC22D1,ALOX5AP,ARG1,ASGR2,BAD,ATP6V1A,GTF2H5,CLPP,BTF3,PTTG1IP,DAK,AKR7A2,CAT,DGAT1,CCNG1,CDK4,CD79B,CEBPB,LTB4R,AP2M1,COX4I1,CTNNA1,SLC25A13,CTSB,MAPK14,PSME3,CSRP1,DAD1,CYC1,RPL23,DECR1,CMPK1,COQ3,PRDX6,DPYD,DPP4,EIF4A2,ACSL3,ERP29,FDFT1,RNPS1,HPSE,ESD,ETFB,FAAH,GLUD1,GLRX,PECI,SEC23A,COPS4,CEPT1,ST3GAL6,PGCP,MRPL2,GAPDH,GAMT,TMED7,GCHFR,GBE1,HBB,…
Drug	D009853	Omeprazole	CTD	0.005019	102	301	CES2,ACACA,ADAM15,FDX1L,ADD1,AHR,ARG1,ASGR2,ATP6V1A,GTF2H5,CLPP,BTF3,PTTG1IP,DAK,AKR7A2,DGAT1,AP2M1,COX4I1,CTNNA1,SLC25A13,CSRP1,RPL23,DECR1,CMPK1,COQ3,PRDX6,DPYD,DPP4,EIF4A2,ERP29,FDFT1,RNPS1,ESD,ETFB,FAAH,PECI,COPS4,CEPT1,ST3GAL6,PGCP,MRPL2,GAPDH,GAMT,TMED7,GCHFR,GBE1,HBB,HAL,GRINA,NR3C1,HSD17B4,HPRT1,HMGN1,TMEM97,LRP3,OAF,MAN2B1,OGDH,NAP1L1,NDUFS5,NFX1,SLC39A8,MAP2K2,SLC25A3,PHYH,BMF,CISD1,RPL…
Drug	D014501	Uranium	CTD	0.010458	88	254	ACTB,ADAR,RNGTT,PRPF4B,RHOA,B2M,ATP6V1A,BTF3,CANX,COPS3,CALM2,AASDHPPT,CUL2,APPL1,TOMM20,TLK1,PDCD6IP,ACTR2,PDCD7,VPS13B,ABCF2,YTHDF3,TRIM28,NAMPT,DGKA,WDR59,EEF1A1,SCAMP1,CLINT1,METAP2,YWHAQ,EPS15,IQGAP2,RMI1,FUT8,GLO1,SEC24B,NDFIP1,SRRM1,DNAJA2,NCOA7,PTGES3,TGOLN2,IPO7,GRB2,HMGB1,SULT1B1,MAT2B,ID2,KPNA3,INSIG1,HBP1,MARCKS,LDHA,LAMP2,MDH2,NAP1L1,NARS,PPP2CA,PIK3R1,MCFD2,RDX,WSB2,RAN,RPL15,PTMA,P…
Drug	C027576	4-hydroxy-2-nonenal	CTD	0.014349	82	234	TRIM24,CCNK,ACTG1,PARP1,FUBP1,AKR1B1,ARHGDIA,ATP1B3,BAD,PRDM1,CSDA,CAPN2,CAPNS1,CCNT1,CD47,CDKN2D,CLK3,TANK,CREBBP,CTNNB1,CRYZ,MAPK14,CSNK1G2,DFFB,DFFA,ELK1,EEF2,EFNA4,RALBP1,FASTK,EPS15,NR2F6,ETV3,ETS1,ETS2,F2R,GNB1,GNB2,GAK,SPRY2,GTF2B,GSK3B,GSR,HMGA1,IL18,IL12RB1,LYN,MARCKSL1,MNDA,P4HB,MYC,MYLK,NBN,NCK1,NFE2L2,NFE2L1,NFX1,NFKB1,NFIX,PPP1CA,POLD1,MAPK3,MAPK1,PPP3CA,REL,RBL2,RB1,PTK2,TSPAN31,RXR…
Drug	CID000000208	glucose-6-phosphate	Stitch	0.01441	118	367	ACACA,SNAP23,ACP5,SKAP2,AP1G2,AP1B1,AP1G1,AGL,AIF1,AKR1B1,ALDOA,ARF1,ARSA,PICALM,PGLS,DAK,AKR7A2,GGA1,CAT,LRBA,VPS24,CLN5,VPS29,CLN3,CLTC,CRAT,CTBS,CTSD,CTSB,CS,STX6,CSNK1G3,CSNK2A2,CSNK1D,CSNK1A1,CSNK1G2,CSNK1E,TM9SF2,DECR1,MAP4K4,VPS26A,COQ3,LMAN2,OS9,HPSE,ETF1,G6PD,GLUD1,NAGPA,GLA,GNS,PGRMC2,GMDS,GAPDH,GFPT1,GBE1,GYS1,GYG1,GPD2,TGOLN2,GSK3B,GSR,SGSM3,HK2,HK3,HHEX,IGF2R,IDS,IDUA,GBA2,LDHA,LAMP1…
Drug	C004648	testosterone enanthate	CTD	0.024271	147	482	CES2,TNFSF10,RNGTT,AKT1,ANGPT1,INTS6,SPAG9,SMC3,ATP2B1,PICALM,ATP6V1A,NCOA3,BNIP3L,CAPN2,B4GALT4,CLIC4,CDC2L1,CD151,PPAP2B,BCLAF1,DHX38,CHD4,ARMCX3,CCS,NLK,RSRC1,MBNL2,SFRS14,PCYOX1,DAB2,WDR46,TIPRL,DIAPH2,ZMYM1,SLC4A7,ECT2,BAG5,SCAMP1,NPEPPS,E2F3,ENG,ELK1,ELF1,PHF14,EFNB2,CEP57,FCGR2A,FASTK,PLEKHA1,EPRS,AKAP13,BAZ1A,DNAJB14,OGFR,WWP2,GLG1,SYNCRIP,SEC23B,GNB1,ST3GAL6,GALK2,ABCA7,MRPS31,GBP2,TXNIP…
GENE ONTOLOGY CATEGORIES
GO: Molecular Function	GO:0003723	RNA binding		0	272	766	ERAL1,ADAR,RNMT,FUBP3,PRPF31,SYNJ2,SYNJ1,DCP2,FUBP1,DAZAP1,ANXA1,RPUSD1,DDX21,LSM4,RBM10,ZFP36L2,ZFP36L1,LARP4,DUSP11,CSDA,CALR,YARS,THOC5,PRKRA,UPF2,ANKRD17,CPEB2,CARS,PNPT1,EIF3B,CCNT1,RTCD1,RNASET2,CDC5L,UNC50,MATR3,CWC15,SETD1A,THOC6,RBM42,LARP7,G3BP2,DDX46,SF3B14,ZFR,LSM8,DDX47,PAIP2,ROD1,THOC1,HNRPDL,SNUPN,MEX3C,TLR8,CSTF3,MBNL2,CSTF2,SFRS14,G3BP1,LRPPRC,NIP7,RBM12,UBR5,CRYZ,RBM7,DDX41,DDX5…
GO: Molecular Function	GO:0003735	structural constituent of ribosome		0	85	162	RPL10L,MRPL52,MRPL49,RPL36,MRPL30,MRP63,RPL23,FAU,RPL35,MRPL3,MRPL55,MRPS2,MRPL4,MRPL2,MRPS18C,MRPS16,MRPL28,RPSA,RPL7L1,MRPL47,RPL10A,MRPS6,MRPL34,MRPL32,MRPS25,MRPL22,MRPL15,MRPL18,RPL6,RPL9,RPL8,RPL11,RPL12,RPL17,RPL15,RPL18,RPL19,RPL18A,MRPL13,RPL3,RPL5,MRPL42,MRPS18B,MRPS14,MRPS21,RPS6,RPS5,RPS9,RPS12,RPS10,RPS11,RPLP1,MRPS12,MRPL12,RPLP2,RPS2,RPS3A,RPS3,RPL32,RPL34,RPL36AL,RPL38,RPL39,RPL41…
GO: Molecular Function	GO:0008134	transcription factor binding		0	183	568	TRIM24,SAP30,ADD1,C19orf2,PARP1,IRF2BP1,AES,BCL10,AHR,PIAS2,AIP,ARRB1,DYRK1B,NMI,NCOA3,NRIP1,BCL2,BCL3,BTG1,CBX4,CSDA,LMO4,IRF2BP2,NIF3L1,NCOA1,RFXANK,CHD4,HDAC4,CEBPB,TTRAP,SERTAD2,PIAS4,MED24,MED12,CLIC1,MAFB,NLK,MED16,MED6,CREBBP,SCAND1,PQBP1,NR1H3,CTBP2,SORBS3,CTNNB1,CTBP1,TRIM28,DDX5,ZNHIT3,TRIP12,DNMT1,MED23,MAGED1,E4F1,TBPL1,DR1,DOM3Z,EP300,NCOR2,LPIN2,COPS5,BPTF,PUS1,SUB1,ERCC3,ERF,ETS1,P…
GO: Molecular Function	GO:0019899	enzyme binding		0	204	664	TRIM24,IQGAP1,ACTB,ADAM10,TRADD,SNX3,ADD3,BCL10,AKT1,ALOX5AP,BIN1,SPAG9,PSTPIP1,ANXA2,RPS6KA4,ARRB2,ZFHX3,BAD,NRIP1,NIPBL,BCL2,BTG1,FMNL1,CBX4,IBTK,CAD,CUL4B,PPP1R16B,CUL4A,CUL2,APPL1,RANBP3,CASP2,SOCS1,CD6,CD4,CD3E,CCND3,CDC42,RFXANK,SKAP1,CHM,HDAC4,CDKN2D,ZC3HC1,DOCK11,RNF40,CCS,NLK,GOLGA5,VRK3,HDAC6,CTNNB1,CSTA,TOPORS,RNF138,CST3,DGKQ,COPB2,LONP1,DNM2,DIAPH2,DFFB,ECT2,BAG5,ATP6V1G1,CDC42BPB,DP…
GO: Molecular Function	GO:0003712	transcription cofactor activity		4e-06	125	395	TRIM24,SAP30,C19orf2,IRF2BP1,AES,BCL10,PIAS2,AIP,DYRK1B,NMI,NCOA3,NRIP1,BTG1,CBX4,CSDA,IRF2BP2,NCOA1,RFXANK,HDAC4,TTRAP,SERTAD2,PIAS4,MED24,MED12,MED16,MED6,CREBBP,SCAND1,PQBP1,NR1H3,CTBP2,CTNNB1,TRIM28,DDX5,MED23,MAGED1,E4F1,TBPL1,DR1,EP300,NCOR2,LPIN2,COPS5,PUS1,SUB1,ERF,PMF1,GABPA,BASP1,SAP18,GTF2A2,GTF2F1,HCFC1,DRAP1,GPS2,USP16,HSBP1,HSF2,HMGA1,IFI16,JUP,JUNB,ECD,IRF3,CALCOCO1,MKL1,USP21,SND1…
GO: Molecular Function	GO:0003713	transcription coactivator activity		4.3e-05	79	227	TRIM24,BCL10,PIAS2,AIP,DYRK1B,NCOA3,NRIP1,NCOA1,SERTAD2,MED24,MED12,MED16,MED6,CREBBP,SCAND1,PQBP1,NR1H3,CTNNB1,TRIM28,MED23,MAGED1,E4F1,TBPL1,EP300,LPIN2,COPS5,PUS1,SUB1,PMF1,GABPA,GTF2A2,GTF2F1,HCFC1,USP16,HSF2,HMGA1,JUP,JUNB,ECD,CALCOCO1,MKL1,USP21,ZMIZ2,MAX,MNT,ENY2,ATXN7L3,NACA,HCFC2,NFE2,NFKBIB,NFKB2,NFYC,RING1,RARA,RAN,RB1,PSMC3,RNF20,SMARCE1,SMARCD1,SMARCC2,SMARCC1,SMARCA4,SMARCA2,RXRB,TF…
GO: Molecular Function	GO:0016887	ATPase activity		4.8e-05	111	353	ABCA2,ABCF1,ABCB7,TRPC4AP,ABCD1,ATP6V0E1,DDX21,ATP5C1,ATP5B,ATP5A1,ATP2A3,ATP2A2,ATP2B1,ATP1B3,ATP5D,ATP5F1,ATP6V1B2,ATP6V0C,ATP5J,ATP6V1A,ATP6V1E1,ATP6AP1,ATP5O,ATP7A,SMARCA5,CCNH,KIAA0195,DHX38,CHD4,CHD1,PSMD6,DDX46,DDX47,ABCF2,G3BP1,DNAL4,PCYOX1,DDX41,DDX5,DDX3X,DDX1,DHX40,LONP1,RECQL5,DDX23,DHX15,ATP6V1G1,EIF4A2,DHX34,BPTF,RALBP1,ERCC3,RUVBL2,KATNA1,ABCC10,DDX52,ATP8B4,CRBN,ATP5H,ABCA7,ABCC4,…
GO: Molecular Function	GO:0016563	transcription activator activity		4.9e-05	140	472	TRIM24,FUBP3,BCL10,PIAS2,AIP,AIRE,DYRK1B,ATF4,NCOA3,NRIP1,BCL2,SMARCA5,NCOA1,SKAP1,HDAC4,CEBPB,CEBPE,SERTAD2,MED24,MED12,MED16,MED6,CREBBP,SCAND1,PQBP1,NR1H3,CTNNB1,TRIM28,PREB,DNM2,MAFA,MED23,MAGED1,E4F1,TBPL1,E2F3,EP300,ELK1,ELF4,LPIN2,ELF1,COPS5,PUS1,SUB1,ETS1,ETS2,PTGES2,PMF1,GABPA,FOXO3,KLF2,GTF2A2,BRF1,GTF2F1,HCFC1,HDAC2,USP16,RBCK1,DEAF1,NR3C1,HSF2,HMGA1,HNRNPD,RBPJ,JUP,JUNB,CHD8,ECD,IRAK1…
GO: Molecular Function	GO:0042802	identical protein binding		0.000103	207	765	ACADM,PLDN,ACTG1,ACTN1,ACTN4,ACVR1,ADAM10,TRADD,ADD1,EED,PARP1,AHCY,BCL10,TRPC4AP,AKT1,ALDH9A1,TAX1BP1,ABCD1,ALDOA,ALOX5AP,CLDN9,DOK2,APAF1,NFS1,ANXA1,OSTF1,ARHGDIA,TBC1D22A,AXIN1,CLPP,GCA,BCL2,BNIP3L,CAD,PRKRA,UPF2,SAV1,HACL1,CAV2,CASP2,CARS,CAT,SUMF2,CD4,CD247,RCHY1,ATL3,SSNA1,CD74,CHKA,CHUK,CEBPB,CEBPE,MBIP,RNF40,GOLGA5,SCAND1,NAMPT,PSME3,LRRK2,DAXX,MAFA,ZNF408,DFFA,MAGED1,ECE1,DPYD,DPP4,DOM3Z…
GO: Molecular Function	GO:0042623	ATPase activity, coupled		0.000196	93	289	ABCA2,ABCF1,ABCB7,TRPC4AP,ABCD1,ATP6V0E1,DDX21,ATP5C1,ATP5B,ATP5A1,ATP2A3,ATP2A2,ATP2B1,ATP1B3,ATP5D,ATP6V1B2,ATP6V0C,ATP6V1A,ATP6V1E1,ATP6AP1,ATP5O,ATP7A,SMARCA5,CCNH,KIAA0195,DHX38,CHD4,CHD1,DDX46,DDX47,G3BP1,DNAL4,PCYOX1,DDX41,DDX5,DDX3X,DDX1,DHX40,LONP1,RECQL5,DDX23,DHX15,ATP6V1G1,EIF4A2,DHX34,BPTF,RALBP1,ERCC3,RUVBL2,KATNA1,ABCC10,DDX52,ATP8B4,CRBN,ABCC4,GTF2H4,GTF2H1,GTF2F2,ATP5L,DDX17,VPS4…
GO: Molecular Function	GO:0016772	transferase activity, transferring phosphorus-containing groups		0.000231	258	1000	TRIM24,TRPM6,GLYCTK,ACVR1,RNGTT,PRPF4B,SPHK1,AKT1,STK19,PAPD4,PAPSS2,PAPSS1,MAP3K14,ARAF,RPS6KA4,DYRK1B,ATM,USP14,PIP5K1B,ULK1,STK24,LTBP4,BLK,NCK2,DAK,CAMK1,ULK3,IKBKG,MADD,CAD,PRKRA,MAPKAPK5,CDK10,AASDHPPT,NEK7,PNPT1,CCDC111,CCNH,CCND3,CDK4,CDK5,CDC2L1,SKAP1,CDC2L5,CHKA,CHUK,KCNH8,SLK,CDKN2D,TLK1,CKB,CLK1,CLK3,NLK,GOLGA5,VRK3,CRKL,MAP3K8,TRIM28,MAPK14,FASTKD3,CSNK1G3,CSNK2A2,REV1,CSK,CSNK1D,TNK…
GO: Molecular Function	GO:0047485	protein N-terminus binding		0.000313	41	97	ACOX1,ACTN4,PARP1,ALOX5AP,ATM,NCOA3,NIPBL,CALM3,NCOA1,EXOC4,CSNK2A2,CHMP6,DAXX,NCOR2,YWHAQ,MORF4L1,ERCC3,GLRX,DCTN4,EXOC5,RBPJ,EIF3E,MEN1,NBN,NFE2,PEX14,PLEC1,RELA,RPA2,PEX5,RAB6A,SMARCE1,SMARCC1,SMARCA4,SDCBP,STX5,STX1A,SPTAN1,TSC1,TPM1,TDRD7
GO: Biological Process	GO:0046907	intracellular transport		0	319	942	ABCA2,SNAP23,PLDN,TNFSF14,RAB11A,ADAM10,MBTPS1,GBF1,AP3D1,AP1G2,AP1S2,AP1B1,AP2A2,AP2A1,AP1G1,KIAA1279,TRPC4AP,AKT1,ABCD1,AIP,CHIC2,ARF1,ARRB1,RHOA,ATP5C1,ATP5B,ATP5A1,ATP2A2,ATP5D,ATP5F1,PICALM,ATP5J,ATP5O,MKKS,BBS1,BCL2,BCL3,BCL6,STX7,PTTG1IP,TSPO,CAMK1,CALM3,CALR,SLC25A20,THOC5,UPF2,RANBP3,GGA1,STX10,VAMP8,CDK5,ATL3,CDC42,LRBA,CD74,USO1,ZFYVE16,SNX17,LYST,CHM,NCKIPSD,CHMP5,THOC6,TOMM20,G3BP2,E…
GO: Biological Process	GO:0045184	establishment of protein localization		0	319	949	SNAP23,PLDN,TNFSF14,ACTN4,RAB11A,SNX3,SNX4,MBTPS1,AP3D1,ADORA2A,AP1G2,AP1S2,AP1B1,AP2A2,AP2A1,AP1G1,GAPVD1,TRPC4AP,AKT1,AIP,ANXA1,ARF1,ARF5,ARRB1,ARRB2,RHOA,SFT2D1,BCL3,BCL6,STX7,C11orf2,PTTG1IP,TSPO,CANX,CALR,APPL1,RANBP3,CASP1,GGA1,CD40LG,CD36,AHCTF1,STX10,CDK5,CHMP2B,UNC50,CD74,USO1,ZFYVE16,SNX17,LYST,CHM,NCKIPSD,CHMP5,TOMM20,G3BP2,EXOC4,TOMM70A,TLK1,VPS24,MVP,AP2M1,AP2S1,AP3S1,DOPEY2,VPS29,CL…
GO: Biological Process	GO:0015031	protein transport		0	314	932	SNAP23,PLDN,TNFSF14,ACTN4,RAB11A,SNX3,SNX4,MBTPS1,AP3D1,ADORA2A,AP1G2,AP1S2,AP1B1,AP2A2,AP2A1,AP1G1,GAPVD1,TRPC4AP,AKT1,AIP,ANXA1,ARF1,ARF5,ARRB1,ARRB2,RHOA,SFT2D1,BCL3,BCL6,STX7,C11orf2,PTTG1IP,TSPO,CANX,CALR,RANBP3,CASP1,GGA1,CD40LG,CD36,AHCTF1,STX10,CDK5,CHMP2B,UNC50,CD74,USO1,ZFYVE16,SNX17,LYST,CHM,NCKIPSD,CHMP5,TOMM20,G3BP2,EXOC4,TOMM70A,TLK1,VPS24,MVP,AP2M1,AP2S1,AP3S1,DOPEY2,VPS29,CLTC,TOM…
GO: Biological Process	GO:0033036	macromolecule localization		0	403	1293	SNAP23,PLDN,TNFSF14,ACTN4,RAB11A,SNX3,SNX4,MBTPS1,GPAA1,AP3D1,ADORA2A,AP1G2,AP1S2,AP1B1,AP2A2,AP2A1,AP1G1,GAPVD1,TRPC4AP,AKT1,AIP,ANXA1,ARF1,ARF5,ARRB1,ARRB2,ARHGDIA,RHOA,BUB3,TMSB10,PICALM,UNC84B,SFT2D1,NRIP1,NIPBL,BCL2,BCL3,BCL6,ULK1,STX7,C11orf2,PTTG1IP,TSPO,CANX,CALR,THOC5,UPF2,APPL1,RANBP3,CASP1,GGA1,CD40LG,CD36,SCARB1,CD4,AHCTF1,STX10,CDK5,CDC42,LRBA,CHMP2B,UNC50,CD74,USO1,ZFYVE16,CHKA,SNX1…
GO: Biological Process	GO:0008104	protein localization		0	357	1110	SNAP23,PLDN,TNFSF14,ACTN4,RAB11A,SNX3,SNX4,MBTPS1,GPAA1,AP3D1,ADORA2A,AP1G2,AP1S2,AP1B1,AP2A2,AP2A1,AP1G1,GAPVD1,TRPC4AP,AKT1,AIP,ANXA1,ARF1,ARF5,ARRB1,ARRB2,ARHGDIA,RHOA,BUB3,TMSB10,PICALM,UNC84B,SFT2D1,NIPBL,BCL2,BCL3,BCL6,ULK1,STX7,C11orf2,PTTG1IP,TSPO,CANX,CALR,APPL1,RANBP3,CASP1,GGA1,CD40LG,CD36,CD4,AHCTF1,STX10,CDK5,CDC42,LRBA,CHMP2B,UNC50,CD74,USO1,ZFYVE16,SNX17,LYST,CHM,NCKIPSD,CHMP5,TOMM…
GO: Biological Process	GO:0006412	translation		0	172	434	RPL10L,ABCF1,AKT1,MRPL52,BCL3,ZFP36L1,NCK2,MRPL49,CALR,YARS,DENR,LSM14A,CPEB2,CARS,EIF3J,EIF3H,EIF3A,EIF3B,RPL36,CDK4,EIF4EBP3,MRPL30,PAIP2,MRP63,DDX1,DARS,NARS2,RPL23,DHPS,EEF1A1,EEF1E1,SELT,EP300,EIF4A2,EIF4B,EIF4G2,EEF2,EEF1D,EEF1B2,FARSA,FAU,PTK2B,COPS5,ABTB1,EPRS,ETF1,RPL35,MRPL3,MRPL55,MTIF3,EIF3M,MRPS2,MRPL4,NDUFA13,MRPL2,MRPS18C,MRPS16,GTF2B,BRF1,MRPL28,MKNK2,SERP1,EIF2C2,TNRC6A,EIF3E,EIF…
GO: Biological Process	GO:0006396	RNA processing		0	208	590	ADAR,RNGTT,RNMT,INTS1,PRPF31,PRPF4B,PAPD4,INTS6,LSM4,DGCR14,RBM10,SPOP,DUSP11,ADAT3,THOC5,PRKRA,PRPF18,ELAC2,PNPT1,INTS7,SYF2,RTCD1,CDC2L1,CDC5L,DHX38,CWC15,THOC6,LARP7,DDX46,SF3B14,LSM8,CLNS1A,ROD1,THOC1,HNRPDL,PDCD7,SNUPN,RSRC1,CSTF3,MBNL2,CSTF2,SFRS14,ARL6IP4,CDC40,TSEN34,DDX41,NOC4L,DDX5,DDX1,ZCCHC6,SFRS11,SNIP1,TRDMT1,ZRANB2,DDX23,DHX15,WTAP,KIAA0391,UTP14C,PUS1,SF3A3,HNRNPA0,RNPS1,PAPOLA,CP…
GO: Biological Process	GO:0006414	translational elongation		0	63	109	RPL36,RPL23,EEF1A1,SELT,EEF2,EEF1D,EEF1B2,FAU,RPL35,RPSA,EIF5A2,RPL10A,RPL6,RPL9,RPL8,RPL11,RPL12,RPL17,RPL15,RPL18,RPL19,RPL18A,RPL3,RPL5,RPS6,RPS5,RPS9,RPS12,RPS10,RPS11,RPLP1,RPLP2,RPS2,RPS3A,RPS3,RPL32,RPL34,RPL38,RPL39,RPL41,RPL21,RPL22,RPL24,RPL27,RPL27A,RPS24,RPS25,RPS20,RPS27,RPS27A,RPS28,RPS29,RPS14,RPS15A,RPS19,RPS16,RPS17,GFM1,SRP14,SRP9,VARS,UBA52,GFM2
GO: Biological Process	GO:0044265	cellular macromolecule catabolic process		0	280	897	AGA,WSB1,AGL,HERC3,AKT1,FBXL6,FBXL5,DCP2,LRRC29,FBXL3,CDC16,ALDOA,PAPD4,PIAS2,APAF1,PGLYRP1,BUB3,ATM,PPIL5,AIFM1,USP8,USP14,BAD,BAP1,CLPP,PGLS,ARIH1,HECTD1,USP11,USP9X,ANAPC13,ASB6,ZFP36L2,ZFP36L1,ASB8,SPOP,CBX4,UPF2,CUL4B,CUL4A,CUL2,SENP6,PNPT1,CD36,SOCS1,CDC23,HYAL2,RCHY1,CCNH,CDC34,RNASET2,UBE2F,UBE2J1,HDAC4,ZC3HC1,FBXL15,UFM1,RNF40,PIAS4,KLHL21,PSMD6,PJA2,USP15,USP3,RBX1,CLN3,HDAC6,CTBS,DDA1,…
GO: Biological Process	GO:0051641	cellular localization		0	398	1399	ABCA2,SNAP23,PLDN,TNFSF14,RAB11A,ADAM10,MBTPS1,GPAA1,GBF1,AP3D1,ADORA2A,AP1G2,AP1S2,AP1B1,AP2A2,AP2A1,AP1G1,KIAA1279,TRPC4AP,SPHK1,AKT1,SYNJ2,SYNJ1,ABCD1,ANXA3,AIP,ANXA1,CHIC2,ARF1,ARRB1,RHOA,BUB3,ATP5C1,ATP5B,ATP5A1,ATP2A2,ATP5D,ATP5F1,PICALM,ATP5J,UNC84B,ATP5O,MKKS,BBS1,NIPBL,BCL2,BCL3,BCL6,LTBP4,STX7,PTTG1IP,TSPO,CANX,CAMK1,CALM3,CALR,SLC25A20,THOC5,UPF2,RANBP3,CASP1,GGA1,CD40LG,CD4,CDC23,DGAT…
GO: Biological Process	GO:0051649	establishment of localization in cell		0	377	1309	ABCA2,SNAP23,PLDN,TNFSF14,RAB11A,ADAM10,MBTPS1,GBF1,AP3D1,ADORA2A,AP1G2,AP1S2,AP1B1,AP2A2,AP2A1,AP1G1,KIAA1279,TRPC4AP,SPHK1,AKT1,SYNJ1,ABCD1,ANXA3,AIP,ANXA1,CHIC2,ARF1,ARRB1,RHOA,ATP5C1,ATP5B,ATP5A1,ATP2A2,ATP5D,ATP5F1,PICALM,ATP5J,UNC84B,ATP5O,MKKS,BBS1,BCL2,BCL3,BCL6,LTBP4,STX7,PTTG1IP,TSPO,CANX,CAMK1,CALM3,CALR,SLC25A20,THOC5,UPF2,RANBP3,CASP1,GGA1,CD40LG,CDC23,DGAT1,STX10,VAMP8,CDK5,ATL3,CDC…
GO: Biological Process	GO:0006886	intracellular protein transport		0	179	516	TNFSF14,RAB11A,MBTPS1,AP3D1,AP1G2,AP1S2,AP1B1,AP2A2,AP2A1,AP1G1,TRPC4AP,AKT1,AIP,RHOA,BCL3,BCL6,STX7,PTTG1IP,TSPO,CALR,GGA1,STX10,CDK5,CD74,USO1,ZFYVE16,SNX17,CHM,NCKIPSD,TOMM20,G3BP2,EXOC4,TOMM70A,TLK1,MVP,AP2M1,AP2S1,AP3S1,CLTC,TOM1,HDAC6,SNUPN,SCAMP3,COPB1,NUP37,STX6,CRY2,ASPSCR1,COPB2,IPO4,TAOK2,RPL23,PEX16,EP300,C3orf31,IPO13,CEP57,YWHAQ,TMED10,ERP29,SENP2,RAB10,GRPEL2,STX2,F2R,GIPC1,NUP50,F…
GO: Biological Process	GO:0044248	cellular catabolic process		0	378	1335	SUCLA2,ACADM,ACADS,ACADVL,ACLY,ACOX1,RAB11A,AGA,WSB1,AHCY,AGL,HERC3,SPHK1,AKT1,FBXL6,FBXL5,DCP2,LRRC29,ABCD1,FBXL3,CDC16,ALDOA,AMPD3,PAPD4,PIAS2,APAF1,PGLYRP1,ARG1,ARSA,BUB3,ATM,PPIL5,AIFM1,ATP5C1,ATP5B,ATP5A1,USP8,USP14,C12orf44,BAD,ATP5D,ATP5O,BAP1,CLPP,PGLS,ARIH1,HECTD1,BCAT2,USP11,USP9X,BCKDHA,ANAPC13,ASB6,ZFP36L2,ZFP36L1,ASB8,ULK1,SPOP,CBX4,UPF2,CUL4B,CUL4A,CUL2,SENP6,HACL1,CAT,PNPT1,CD36,SC…
GO: Biological Process	GO:0016071	mRNA metabolic process		0	148	411	ADAR,RNGTT,RNMT,PRPF31,PRPF4B,DCP2,PAPD4,ATM,LSM4,DGCR14,RBM10,ZFP36L2,ZFP36L1,SPOP,THOC5,UPF2,PRPF18,PNPT1,SYF2,CDC2L1,CDC5L,DHX38,CWC15,THOC6,DDX46,SF3B14,LSM8,CLNS1A,ROD1,THOC1,HNRPDL,SNUPN,RSRC1,CSTF3,MBNL2,CSTF2,SFRS14,CDC40,TSEN34,DDX41,DDX5,DDX1,ZCCHC6,SFRS11,ZRANB2,DDX23,DHX15,DNAJB11,WTAP,SF3A3,HNRNPA0,RNPS1,PAPOLA,CPSF4,POP4,THOC7,FRG1,NUDT21,SYNCRIP,DBR1,SF3B4,SRRM1,SMNDC1,C19orf29,RBM…
GO: Biological Process	GO:0034613	cellular protein localization		0	190	572	TNFSF14,RAB11A,MBTPS1,AP3D1,AP1G2,AP1S2,AP1B1,AP2A2,AP2A1,AP1G1,TRPC4AP,AKT1,AIP,RHOA,UNC84B,NIPBL,BCL3,BCL6,STX7,PTTG1IP,TSPO,CALR,GGA1,STX10,CDK5,CDC42,CD74,USO1,ZFYVE16,SNX17,CHM,NCKIPSD,TOMM20,G3BP2,EXOC4,TOMM70A,TLK1,MVP,AP2M1,AP2S1,AP3S1,CLTC,TOM1,HDAC6,SNUPN,SCAMP3,COPB1,CTNNB1,NUP37,STX6,TOPORS,CRY2,ASPSCR1,COPB2,IPO4,TAOK2,RPL23,PEX16,EP300,C3orf31,IPO13,CEP57,YWHAQ,TMED10,ERP29,SENP2,RA…
GO: Biological Process	GO:0016192	vesicle-mediated transport		0	228	726	SNAP23,PLDN,ACTN4,SNX3,SNX4,GBF1,AP3D1,ADORA2A,AP1G2,AP1S2,CPNE1,AP1B1,AP2A2,AP2A1,AP1G1,GAPVD1,SYNJ1,TRAPPC6B,BIN1,ANXA3,ANXA11,HIP1R,ANXA1,ANXA2,CHIC2,ARF1,ARF5,ARRB1,ARRB2,ASGR2,ATP5B,AZU1,PICALM,SFT2D1,ULK1,STX7,CALR,CAV2,GGA1,CD36,SCARB1,CD14,STX10,VAMP4,VAMP8,CDK5,ATL3,CDC42,LRBA,CD47,USO1,ZFYVE16,SNX17,LYST,CHMP5,CEBPE,SCRN1,ERGIC3,EXOC4,AP2M1,AP2S1,AP3S1,DOPEY2,VPS29,CLN3,GOLGA5,CLTC,TOM1…
GO: Biological Process	GO:0044419	interspecies interaction between organisms		0	125	346	BANF1,TNFRSF14,RNGTT,AP1G2,CFLAR,BIN1,ANPEP,SLC25A4,RHOA,ATP6V0C,BNIP3L,IKBKG,THOC5,CUL2,ANKRD17,CD36,SCARB1,CD4,CD247,CCNT1,THOC6,PIAS4,PDCD6IP,ACOT8,CREBBP,THOC1,COPB1,CTBP1,CCDC86,DDX3X,NLRX1,DAXX,E4F1,EP300,EIF4A2,EFNB2,COPS6,CPSF4,ERCC3,ETF1,THOC7,PSIP1,WWP2,WWP1,SYNCRIP,RTN3,GUCY1A3,GTF2B,GTF2A2,HCFC1,IVNS1ABP,F11R,SMC2,RBCK1,IPO7,GRB2,HMGA1,APOBEC3C,HLA-A,IL2RG,IDE,SP110,HSPD1,KPNA2,KPNB1,…
GO: Biological Process	GO:0008219	cell death		0	374	1385	ABR,TNFRSF6B,TNFSF14,TNFSF10,ACTN1,ACTN4,TNFRSF14,ACVR1,ADAR,TNFRSF25,TRADD,ADM,ADORA2A,INTS1,BCL10,SPHK1,AKT1,AHR,AIF1,TAX1BP1,ALKBH1,CFLAR,ANGPT1,APAF1,SLC25A4,ANXA1,PGLYRP1,BIRC2,ARRB2,ARHGAP4,ARHGDIA,RHOA,DEDD,ATM,AIFM1,DNAJA3,B2M,AZU1,BAD,ATP6AP1,AXIN1,ATP7A,TNFAIP8,PRDX5,BCL2,BCL3,BCL6,BTG1,BMI1,BNIP3L,BOK,NSMAF,BNIP2,TSPO,C5,CBX4,CSDA,IKBKG,CALR,MADD,YARS,PRKRA,GPR65,CUL4A,CUL2,CASP1,CASP2…
GO: Biological Process	GO:0034962	cellular biopolymer catabolic process		0	210	686	WSB1,AGL,HERC3,AKT1,FBXL6,FBXL5,DCP2,LRRC29,FBXL3,CDC16,PAPD4,PIAS2,BUB3,ATM,PPIL5,AIFM1,USP8,USP14,BAP1,CLPP,ARIH1,HECTD1,USP11,USP9X,ANAPC13,ASB6,ASB8,SPOP,CBX4,CUL4B,CUL4A,CUL2,SENP6,SOCS1,CDC23,RCHY1,CDC34,RNASET2,UBE2F,UBE2J1,ZC3HC1,FBXL15,UFM1,RNF40,PIAS4,KLHL21,PSMD6,PJA2,USP15,USP3,RBX1,HDAC6,CTBS,DDA1,UCHL5,CUEDC2,UBR5,TOPORS,USPL1,PSMD14,PSME3,RNF138,PCYOX1,CSNK1D,CSNK1E,UBE2L6,ZCCHC6,T…
GO: Biological Process	GO:0016265	death		0	374	1390	ABR,TNFRSF6B,TNFSF14,TNFSF10,ACTN1,ACTN4,TNFRSF14,ACVR1,ADAR,TNFRSF25,TRADD,ADM,ADORA2A,INTS1,BCL10,SPHK1,AKT1,AHR,AIF1,TAX1BP1,ALKBH1,CFLAR,ANGPT1,APAF1,SLC25A4,ANXA1,PGLYRP1,BIRC2,ARRB2,ARHGAP4,ARHGDIA,RHOA,DEDD,ATM,AIFM1,DNAJA3,B2M,AZU1,BAD,ATP6AP1,AXIN1,ATP7A,TNFAIP8,PRDX5,BCL2,BCL3,BCL6,BTG1,BMI1,BNIP3L,BOK,NSMAF,BNIP2,TSPO,C5,CBX4,CSDA,IKBKG,CALR,MADD,YARS,PRKRA,GPR65,CUL4A,CUL2,CASP1,CASP2…
GO: Biological Process	GO:0012501	programmed cell death		0	348	1279	ABR,TNFRSF6B,TNFSF14,TNFSF10,ACTN1,ACTN4,TNFRSF14,ACVR1,ADAR,TNFRSF25,TRADD,ADM,ADORA2A,INTS1,BCL10,SPHK1,AKT1,AHR,AIF1,TAX1BP1,ALKBH1,CFLAR,ANGPT1,APAF1,ANXA1,PGLYRP1,BIRC2,ARRB2,ARHGAP4,ARHGDIA,RHOA,DEDD,ATM,AIFM1,DNAJA3,B2M,AZU1,BAD,AXIN1,ATP7A,TNFAIP8,PRDX5,BCL2,BCL3,BCL6,BTG1,BMI1,BNIP3L,BOK,NSMAF,BNIP2,TSPO,C5,CBX4,CSDA,IKBKG,CALR,MADD,YARS,PRKRA,GPR65,CUL4A,CUL2,CASP1,CASP2,CASP4,CAT,CD40L…
GO: Biological Process	GO:0006915	apoptosis		0	343	1265	ABR,TNFRSF6B,TNFSF14,TNFSF10,ACTN1,ACTN4,TNFRSF14,ACVR1,ADAR,TNFRSF25,TRADD,ADM,ADORA2A,INTS1,BCL10,SPHK1,AKT1,AHR,AIF1,TAX1BP1,ALKBH1,CFLAR,ANGPT1,APAF1,ANXA1,PGLYRP1,BIRC2,ARRB2,ARHGAP4,ARHGDIA,RHOA,DEDD,ATM,AIFM1,DNAJA3,B2M,AZU1,BAD,AXIN1,ATP7A,TNFAIP8,PRDX5,BCL2,BCL3,BCL6,BTG1,BMI1,BNIP3L,BOK,NSMAF,BNIP2,TSPO,C5,CBX4,CSDA,IKBKG,CALR,MADD,YARS,PRKRA,GPR65,CUL4A,CUL2,CASP1,CASP2,CASP4,CAT,CD40L…
GO: Biological Process	GO:0008380	RNA splicing		0	111	305	PRPF31,PRPF4B,LSM4,DGCR14,RBM10,THOC5,PRPF18,SYF2,CDC5L,DHX38,CWC15,THOC6,DDX46,SF3B14,LSM8,CLNS1A,THOC1,PDCD7,SNUPN,RSRC1,CSTF3,MBNL2,CSTF2,SFRS14,ARL6IP4,CDC40,TSEN34,DDX41,DDX5,DDX1,SFRS11,ZRANB2,DDX23,DHX15,WTAP,SF3A3,HNRNPA0,RNPS1,PAPOLA,THOC7,FRG1,NUDT21,SYNCRIP,DBR1,SF3B4,SRRM1,SMNDC1,C19orf29,RBM25,GTF2F1,GTF2F2,IVNS1ABP,PRPF8,LSM1,LSM3,HNRNPL,HNRNPH2,HNRNPF,HNRNPD,HNRNPC,PRPF19,PTBP2,LSM…
GO: Biological Process	GO:0006397	mRNA processing		0	123	350	ADAR,RNGTT,RNMT,PRPF31,PRPF4B,PAPD4,LSM4,DGCR14,RBM10,SPOP,THOC5,PRPF18,SYF2,CDC2L1,CDC5L,DHX38,CWC15,THOC6,DDX46,SF3B14,LSM8,CLNS1A,ROD1,THOC1,SNUPN,RSRC1,CSTF3,MBNL2,CSTF2,SFRS14,CDC40,TSEN34,DDX41,DDX5,DDX1,SFRS11,ZRANB2,DDX23,DHX15,WTAP,SF3A3,HNRNPA0,RNPS1,PAPOLA,CPSF4,POP4,THOC7,FRG1,NUDT21,SYNCRIP,DBR1,SF3B4,SRRM1,SMNDC1,C19orf29,RBM25,GTF2F1,GTF2F2,KHDRBS1,PRPF8,GRSF1,LSM1,LSM3,EIF2C2,HNRN…
GO: Biological Process	GO:0007049	cell cycle		0	302	1099	CCNK,RAB11A,ACVR1,CCNA1,BCL10,SPHK1,AKT1,AHR,AIF1,CDC16,PHGDH,BIN1,ANXA11,ANXA1,ARL2,BUB3,ATM,SMC3,UNC84B,AXIN1,NIPBL,USP9X,BCL2,ANAPC13,BCL6,BRMS1,RECK,MAD1L1,CALM2,CALM1,CALM3,CALR,MADD,CDK10,CUL4B,CUL4A,CUL2,APPL1,CAV2,PPM1D,CDC23,AHCTF1,CCNT1,CCNH,CCNG2,CCNG1,CCND3,CDK4,CDK5,CDC25B,CDC34,CDC42,CDC2L1,CDC5L,CDC2L5,RASSF2,MTSS1,CP110,HDAC4,CDKN2D,ZC3HC1,CDKN1B,SIRT7,KIAA0174,RB1CC1,PSMD6,TLK1,V…
GO: Biological Process	GO:0048193	Golgi vesicle transport		0	62	139	SNAP23,PLDN,GBF1,AP1S2,AP1B1,AP2A1,AP1G1,CHIC2,ARF1,ARRB1,STX7,STX10,VAMP8,ATL3,EXOC4,DOPEY2,VPS29,GOLGA5,CLTC,SCAMP3,SCAMP2,COPB1,PREB,STX6,COPB2,DNM2,SCAMP1,SEC22B,CLINT1,TMED10,FTH1,FTL,RER1,RAB31,SEC23A,SEC23B,COG5,SAR1B,GOLGA7,SEC24B,BLOC1S1,BET1,EXOC5,COPE,GABARAPL2,SEC22A,SCYL1,TRAPPC3,COG3,SAR1A,RAB8A,NRBP1,ARFGAP1,PACS1,RAB1A,VAMP7,VAMP2,TAPBP,SPAST,KIAA1012,VCP,VPS13A
GO: Biological Process	GO:0009057	macromolecule catabolic process		0	366	1401	ADAM15,ADAM10,ADAM8,MBTPS1,AGA,WSB1,AGL,HERC3,AKT1,FBXL6,FBXL5,DCP2,LRRC29,FBXL3,CDC16,CFLAR,ALDOA,PAPD4,PIAS2,PRSS33,APAF1,ANPEP,APEH,PGLYRP1,BUB3,PCSK7,ATM,PPIL5,AIFM1,USP8,USP14,AZU1,BAD,AXIN1,BAP1,CLPP,QPCT,PGLS,ARIH1,HECTD1,USP11,USP9X,ANAPC13,ASB6,ZFP36L2,ZFP36L1,ASB8,SPOP,LTBP4,CBX4,CAST,CAPN2,CAPNS1,UPF2,CUL4B,CUL4A,CUL2,SENP6,CASP1,CASP2,CASP4,PNPT1,CD36,SOCS1,CDC23,HYAL2,RCHY1,CCNH,CDK5…
GO: Biological Process	GO:0019941	modification-dependent protein catabolic process		1e-06	181	605	WSB1,HERC3,AKT1,FBXL6,FBXL5,LRRC29,FBXL3,CDC16,PIAS2,BUB3,PPIL5,USP8,USP14,BAP1,ARIH1,HECTD1,USP11,USP9X,ANAPC13,ASB6,ASB8,SPOP,CBX4,CUL4B,CUL4A,CUL2,SENP6,SOCS1,CDC23,RCHY1,CDC34,UBE2F,UBE2J1,ZC3HC1,FBXL15,UFM1,RNF40,PIAS4,KLHL21,PSMD6,PJA2,USP15,USP3,RBX1,HDAC6,DDA1,UCHL5,CUEDC2,UBR5,TOPORS,USPL1,PSMD14,PSME3,RNF138,PCYOX1,CSNK1D,CSNK1E,UBE2L6,TRIP12,UBE4A,LONP1,FBXO31,PSMF1,E4F1,UBE3C,RAB40B,O…
GO: Biological Process	GO:0043632	modification-dependent macromolecule catabolic process		1e-06	181	605	WSB1,HERC3,AKT1,FBXL6,FBXL5,LRRC29,FBXL3,CDC16,PIAS2,BUB3,PPIL5,USP8,USP14,BAP1,ARIH1,HECTD1,USP11,USP9X,ANAPC13,ASB6,ASB8,SPOP,CBX4,CUL4B,CUL4A,CUL2,SENP6,SOCS1,CDC23,RCHY1,CDC34,UBE2F,UBE2J1,ZC3HC1,FBXL15,UFM1,RNF40,PIAS4,KLHL21,PSMD6,PJA2,USP15,USP3,RBX1,HDAC6,DDA1,UCHL5,CUEDC2,UBR5,TOPORS,USPL1,PSMD14,PSME3,RNF138,PCYOX1,CSNK1D,CSNK1E,UBE2L6,TRIP12,UBE4A,LONP1,FBXO31,PSMF1,E4F1,UBE3C,RAB40B,O…
GO: Biological Process	GO:0044085	cellular component biogenesis		1e-06	363	1401	TRIM24,SNAP23,ACTG1,ACTN1,ACTN4,TRADD,ADD1,GPAA1,SKAP2,ADSL,PRPF31,TTLL3,BCL10,TRPC4AP,AHR,AIF1,SYNJ1,ALOX5AP,ANGPT1,SLC7A6,SPAG9,NFS1,BIRC2,H1FX,ARL2,RHOA,TMSB10,C12orf44,PICALM,ATP7A,MKKS,CLPP,BBS1,ASF1A,BCL2,NCK2,HIST1H2AC,HIST2H2AA3,HIST1H2BF,CAPZA1,CAPZA2,CALD1,KCNAB2,HAT1,CALR,DENR,LSM14A,SMARCA5,OGT,GPR65,CAV2,CAT,EIF3J,EIF3H,EIF3A,EIF3B,CD9,DGAT1,AHCTF1,CD3E,BECN1,CCNH,VAMP8,CDK5,ATL3,CDC…
GO: Biological Process	GO:0043933	macromolecular complex subunit organization		1e-06	286	1060	TRIM24,SNAP23,TRADD,ADD1,GPAA1,SKAP2,ADSL,PRPF31,BCL10,TRPC4AP,AHR,SYNJ1,ALOX5AP,ANGPT1,SLC7A6,SPAG9,NFS1,BIRC2,H1FX,ARL2,RHOA,TMSB10,PICALM,CLPP,ASF1A,NCK2,HIST1H2AC,HIST2H2AA3,HIST1H2BF,CAPZA1,CAPZA2,KCNAB2,CALR,DENR,LSM14A,SMARCA5,OGT,CAV2,CAT,EIF3J,EIF3H,CD36,SCARB1,EIF3A,EIF3B,CD9,DGAT1,AHCTF1,CD3E,CCNH,VAMP8,CDK5,ATL3,CDC42,EIF4EBP3,PSMG1,CD74,MTSS1,C20orf7,CDKN1B,CETP,MED24,MED12,AP2S1,CLN…
GO: Biological Process	GO:0044257	cellular protein catabolic process		1e-06	184	622	WSB1,HERC3,AKT1,FBXL6,FBXL5,LRRC29,FBXL3,CDC16,PIAS2,BUB3,PPIL5,USP8,USP14,BAP1,CLPP,ARIH1,HECTD1,USP11,USP9X,ANAPC13,ASB6,ASB8,SPOP,CBX4,CUL4B,CUL4A,CUL2,SENP6,SOCS1,CDC23,RCHY1,CDC34,UBE2F,UBE2J1,ZC3HC1,FBXL15,UFM1,RNF40,PIAS4,KLHL21,PSMD6,PJA2,USP15,USP3,RBX1,HDAC6,DDA1,UCHL5,CUEDC2,UBR5,TOPORS,USPL1,PSMD14,PSME3,RNF138,PCYOX1,CSNK1D,CSNK1E,UBE2L6,TRIP12,UBE4A,LONP1,FBXO31,PSMF1,E4F1,UBE3C,RAB…
GO: Biological Process	GO:0051603	proteolysis involved in cellular protein catabolic process		1e-06	183	618	WSB1,HERC3,AKT1,FBXL6,FBXL5,LRRC29,FBXL3,CDC16,PIAS2,BUB3,PPIL5,USP8,USP14,BAP1,CLPP,ARIH1,HECTD1,USP11,USP9X,ANAPC13,ASB6,ASB8,SPOP,CBX4,CUL4B,CUL4A,CUL2,SENP6,SOCS1,CDC23,RCHY1,CDC34,UBE2F,UBE2J1,ZC3HC1,FBXL15,UFM1,RNF40,PIAS4,KLHL21,PSMD6,PJA2,USP15,USP3,RBX1,HDAC6,DDA1,UCHL5,CUEDC2,UBR5,TOPORS,USPL1,PSMD14,PSME3,RNF138,PCYOX1,CSNK1D,CSNK1E,UBE2L6,TRIP12,UBE4A,LONP1,FBXO31,PSMF1,E4F1,UBE3C,RAB…
GO: Biological Process	GO:0065003	macromolecular complex assembly		1e-06	268	982	TRIM24,SNAP23,TRADD,ADD1,GPAA1,SKAP2,ADSL,PRPF31,BCL10,TRPC4AP,AHR,SYNJ1,ALOX5AP,ANGPT1,SLC7A6,SPAG9,NFS1,BIRC2,H1FX,ARL2,RHOA,TMSB10,PICALM,CLPP,ASF1A,NCK2,HIST1H2AC,HIST2H2AA3,HIST1H2BF,CAPZA1,CAPZA2,KCNAB2,CALR,DENR,LSM14A,SMARCA5,OGT,CAV2,CAT,EIF3J,EIF3H,EIF3A,EIF3B,CD9,DGAT1,AHCTF1,CD3E,CCNH,VAMP8,CDK5,ATL3,CDC42,EIF4EBP3,PSMG1,CD74,MTSS1,C20orf7,CDKN1B,MED24,MED12,AP2S1,CLNS1A,COX10,MED16,H…
GO: Biological Process	GO:0043285	biopolymer catabolic process		1e-06	339	1297	ADAM15,ADAM10,ADAM8,MBTPS1,WSB1,AGL,HERC3,AKT1,FBXL6,FBXL5,DCP2,LRRC29,FBXL3,CDC16,CFLAR,PAPD4,PIAS2,PRSS33,APAF1,ANPEP,APEH,PGLYRP1,BUB3,PCSK7,ATM,PPIL5,AIFM1,USP8,USP14,AZU1,AXIN1,BAP1,CLPP,QPCT,ARIH1,HECTD1,USP11,USP9X,ANAPC13,ASB6,ZFP36L2,ZFP36L1,ASB8,SPOP,LTBP4,CBX4,CAST,CAPN2,CAPNS1,UPF2,CUL4B,CUL4A,CUL2,SENP6,CASP1,CASP2,CASP4,PNPT1,SOCS1,CDC23,HYAL2,RCHY1,CCNH,CDC34,RNASET2,UBE2F,UBE2J1,Z…
GO: Biological Process	GO:0033554	cellular response to stress		2e-06	202	699	PARP1,ADM,BCL10,AKT1,ALKBH1,AKR1B1,ASH2L,ANXA1,RHOA,ATM,ATF4,AIFM1,SMC3,C12orf44,GTF2H5,AXIN1,ATP7A,PRDX5,NIPBL,ASF1A,BCL2,BCL3,BCL6,ULK1,IKBKG,CUL4B,CUL4A,ANKRD17,CAT,BECN1,CCNH,CCNG1,CDC42,CD74,CD44,PTPLAD1,SLK,CDKN2D,TTRAP,RB1CC1,TLK1,RBX1,DCLRE1A,CLN3,SH2D3C,HDAC6,CRY1,PDCD6IP,CRKL,ALKBH2,OBFC2B,TRAP1,CTSD,UBR5,MAPK14,TOPORS,CRY2,REV1,ATG9A,CSNK1D,CSNK1E,DAXX,TAOK2,LONP1,FBXO31,RECQL5,ARHGEF6…
GO: Biological Process	GO:0016044	membrane organization		3e-06	154	504	SNAP23,PLDN,ACTN4,SNX3,SNX4,GBF1,ADORA2A,AP1S2,AP1B1,AP2A2,AP2A1,AP1G1,GAPVD1,SYNJ1,BIN1,ANXA3,ANXA11,ANXA7,HIP1R,ANXA1,ANXA2,ARF1,ARRB1,ARRB2,ASGR2,DYRK1B,ATP5B,AZU1,PICALM,UNC84B,GCA,BCL2,ULK1,CAST,CAPN2,CALR,CAV2,CASP1,CD36,SCARB1,CD14,CD9,AHCTF1,VAMP8,CDK5,CD47,CD44,USO1,ZFYVE16,SNX17,CEBPE,AP2S1,CLN3,CLTC,TOM1,DNM1L,NR1H3,COPB1,UNC13D,WASF2,PREB,STX6,PDLIM7,DAB2,COPB2,ELMO3,DNM2,PEX16,SCAMP1…
GO: Biological Process	GO:0007243	protein kinase cascade		5e-06	188	648	TNFSF14,TNFSF10,TRADD,BCL10,AGER,AKT1,AKR1B1,CFLAR,SPAG9,DOK2,MAP3K14,BIRC2,RPS6KA4,ARRB1,ARRB2,RHOA,NMI,AXIN1,BCL3,BLK,C5,IKBKG,MADD,CASP1,CAT,CD36,SOCS1,CDK5,CDC42,CD74,CD44,TNIP2,PTPLAD1,CHUK,MBIP,RB1CC1,PIAS4,G3BP2,NLK,VRK3,SH2D3C,TANK,CRKL,TLR8,SORBS3,CTNNB1,MAPK14,TRIM13,LRRK2,DGKQ,DAPK3,DAXX,TAOK2,SNIP1,MAP4K4,ARHGEF6,ECT2,LITAF,DUSP6,ZAK,EP300,MARK2,IKBKE,EEF1D,PTK2B,GADD45G,MALT1,PLEKHA1…
GO: Biological Process	GO:0010605	negative regulation of macromolecule metabolic process		5e-06	239	868	TRIM24,SAP30,ACADVL,ADAR,ADD1,EED,IRF2BP1,AES,AKT1,AIF1,PER2,BTAF1,ARRB2,DEDD,TMSB10,ASCL2,ZFHX3,SMC3,NRIP1,PRDM1,NIPBL,ASF1A,ZNF345,BCL3,BCL6,BMI1,BNIP3L,CBX4,CSDA,CAPZA1,CAPZA2,IBTK,HAT1,CALR,PRKRA,IRF2BP2,SMARCA5,SOCS1,CDK5,COBRA1,EIF4EBP3,BCLAF1,HDAC4,ZEB2,CDKN1B,SIRT7,PIAS4,CLN3,HDAC6,PAIP2,PHF21A,NR1H3,CTBP2,SORBS3,CTNNB1,CTBP1,TRIM28,CST3,DAXX,TCEAL1,SNIP1,DNMT1,ATG5,BAG5,DR1,EPB49,ENG,NCO…
GO: Biological Process	GO:0006605	protein targeting		6e-06	100	293	TNFSF14,MBTPS1,AKT1,AIP,RHOA,BCL3,BCL6,PTTG1IP,TSPO,CALR,CDK5,ZFYVE16,NCKIPSD,TOMM20,G3BP2,EXOC4,TOMM70A,SNUPN,CRY2,IPO4,TAOK2,RPL23,PEX16,EP300,C3orf31,IPO13,CEP57,YWHAQ,GRPEL2,F2R,GIPC1,FYB,CDC37,FLNA,NUPL2,TACC3,NAGPA,TIMM44,TRNT1,NDUFA13,TIMM17B,DUSP18,MGEA5,TXNIP,GSK3B,IPO7,KPNA2,KPNA3,KPNB1,JUP,JAK2,SMAD4,LMNA,TNPO1,KPNA4,MTX1,NLRP12,NFKBIB,NFKBIA,TMCO6,MAPK3,MAPK1,PKIA,PPP2R2B,PPP3CA,PEX14…
GO: Biological Process	GO:0010941	regulation of cell death		9e-06	272	1017	ABR,TNFRSF6B,TNFSF14,TNFSF10,ACTN1,ACTN4,ACVR1,ADAR,TNFRSF25,TRADD,ADM,ADORA2A,INTS1,BCL10,SPHK1,AKT1,AIF1,TAX1BP1,ALKBH1,CFLAR,ANGPT1,APAF1,SLC25A4,ANXA1,BIRC2,ARRB2,ARHGAP4,ARHGDIA,RHOA,DEDD,ATM,AIFM1,DNAJA3,B2M,AZU1,BAD,ATP7A,TNFAIP8,PRDX5,BCL2,BCL3,BCL6,BTG1,BMI1,BNIP3L,BOK,NSMAF,BNIP2,C5,CBX4,CSDA,IKBKG,CALR,MADD,PRKRA,CUL4A,CUL2,CASP1,CASP2,CASP4,CAT,CD40LG,TNFRSF8,PDE5A,CD3E,BECN1,CCNG1,CD…
GO: Biological Process	GO:0051246	regulation of protein metabolic process		9e-06	196	687	TNFRSF14,ADD1,BCL10,SPHK1,AKT1,AIF1,ANGPT1,ARRB1,ARRB2,RHOA,TMSB10,AXIN1,NIPBL,BCL2,BCL3,ZFP36L1,LTBP4,NCK2,CAPZA1,CAPZA2,IBTK,CALR,LSM14A,CPEB2,EIF3J,EIF3H,EIF3A,EIF3B,SOCS1,CD6,CD4,CD3E,RCHY1,CCND3,CDK4,CDK5,CDC34,EIF4EBP3,UBE2F,CD74,CD44,UBE2J1,HDAC4,CHMP5,CDKN1B,RB1CC1,PIAS4,CLN3,HDAC6,PAIP2,ARPC2,ACTR3,ARPC3,ARPC5,NR1H3,CTNNB1,CST3,CSNK1D,TNK2,CSNK1E,LRRK2,UBE2L6,DDX1,DNMT1,ECE1,ATG5,BAG5,SE…
GO: Biological Process	GO:0022607	cellular component assembly		9e-06	331	1281	TRIM24,SNAP23,ACTG1,ACTN1,ACTN4,TRADD,ADD1,GPAA1,SKAP2,ADSL,PRPF31,TTLL3,BCL10,TRPC4AP,AHR,AIF1,SYNJ1,ALOX5AP,ANGPT1,SLC7A6,SPAG9,NFS1,BIRC2,H1FX,ARL2,RHOA,TMSB10,C12orf44,PICALM,ATP7A,MKKS,CLPP,BBS1,ASF1A,BCL2,NCK2,HIST1H2AC,HIST2H2AA3,HIST1H2BF,CAPZA1,CAPZA2,CALD1,KCNAB2,HAT1,CALR,DENR,LSM14A,SMARCA5,OGT,GPR65,CAV2,CAT,EIF3J,EIF3H,EIF3A,EIF3B,CD9,DGAT1,AHCTF1,CD3E,BECN1,CCNH,VAMP8,CDK5,ATL3,CDC…
GO: Biological Process	GO:0043067	regulation of programmed cell death		1.1e-05	269	1006	ABR,TNFRSF6B,TNFSF14,TNFSF10,ACTN1,ACTN4,ACVR1,ADAR,TNFRSF25,TRADD,ADM,ADORA2A,INTS1,BCL10,SPHK1,AKT1,AIF1,TAX1BP1,ALKBH1,CFLAR,ANGPT1,APAF1,ANXA1,BIRC2,ARRB2,ARHGAP4,ARHGDIA,RHOA,DEDD,ATM,AIFM1,DNAJA3,B2M,AZU1,BAD,ATP7A,TNFAIP8,PRDX5,BCL2,BCL3,BCL6,BTG1,BMI1,BNIP3L,BOK,NSMAF,BNIP2,C5,CBX4,CSDA,IKBKG,CALR,MADD,PRKRA,CUL4A,CUL2,CASP1,CASP2,CASP4,CAT,CD40LG,TNFRSF8,PDE5A,CD3E,BECN1,CCNG1,CDK4,CDK5,…
GO: Biological Process	GO:0009892	negative regulation of metabolic process		1.8e-05	250	927	TRIM24,SAP30,ACADVL,ACP5,ADAR,ADD1,EED,IRF2BP1,AES,AKT1,AIF1,PER2,BTAF1,ARRB2,DEDD,TMSB10,ASCL2,ZFHX3,SMC3,NRIP1,PRDM1,NIPBL,ASF1A,ZNF345,BCL3,BCL6,BMI1,BNIP3L,CBX4,CSDA,CAPZA1,CAPZA2,IBTK,HAT1,CALR,PRKRA,IRF2BP2,SMARCA5,SOCS1,CDK5,COBRA1,EIF4EBP3,BCLAF1,HDAC4,CDKN2D,ZEB2,CDKN1B,SIRT7,PIAS4,CLN3,HDAC6,PAIP2,PHF21A,NR1H3,CTBP2,SORBS3,CTNNB1,CTBP1,TRIM28,CST3,DAXX,TCEAL1,SNIP1,DNMT1,ATG5,BAG5,DR1,E…
GO: Biological Process	GO:0042981	regulation of apoptosis		2e-05	265	994	ABR,TNFRSF6B,TNFSF14,TNFSF10,ACTN1,ACTN4,ACVR1,ADAR,TNFRSF25,TRADD,ADM,ADORA2A,INTS1,BCL10,SPHK1,AKT1,AIF1,TAX1BP1,ALKBH1,CFLAR,ANGPT1,APAF1,ANXA1,BIRC2,ARRB2,ARHGAP4,ARHGDIA,RHOA,DEDD,ATM,AIFM1,DNAJA3,B2M,AZU1,BAD,ATP7A,TNFAIP8,PRDX5,BCL2,BCL3,BCL6,BTG1,BMI1,BNIP3L,BOK,NSMAF,BNIP2,C5,CBX4,CSDA,IKBKG,CALR,MADD,PRKRA,CUL4A,CUL2,CASP1,CASP2,CASP4,CAT,CD40LG,TNFRSF8,PDE5A,CD3E,BECN1,CCNG1,CDK4,CDK5,…
GO: Biological Process	GO:0034621	cellular macromolecular complex subunit organization		2e-05	195	689	TRIM24,ADD1,PRPF31,AHR,SYNJ1,H1FX,ARL2,RHOA,TMSB10,PICALM,ASF1A,NCK2,HIST1H2AC,HIST2H2AA3,HIST1H2BF,CAPZA1,CAPZA2,CALR,DENR,LSM14A,SMARCA5,EIF3J,EIF3H,EIF3A,EIF3B,AHCTF1,CD3E,CCNH,CDK5,EIF4EBP3,PSMG1,MTSS1,C20orf7,CDKN1B,MED24,MED12,AP2S1,CLNS1A,COX10,MED16,HDAC6,PAIP2,ARPC2,ACTR3,ARPC3,ARPC5,SNUPN,MIS12,NIP7,DDX1,NDUFS7,IPO4,LONP1,DIAPH2,DDX23,MED23,TBPL1,E2F3,H2AFY,EP300,EPB49,CLINT1,EIF4A2,EIF…
GO: Biological Process	GO:0032446	protein modification by small protein conjugation		2.4e-05	78	216	BCL10,AKT1,FBXL5,FBXL3,CDC16,PIAS2,TRIM23,ARRB2,AXIN1,HECTD1,BCL2,ANAPC13,BMI1,CDC23,RCHY1,CDK5,CDC34,UBE2F,HDAC4,UFM1,RNF40,PIAS4,RBX1,HDAC6,LRRK2,TRIP12,UBE4A,ATG5,BAG5,UBE3C,OS9,FBXO11,VCPIP1,WWP2,WWP1,CBLL1,ZER1,VPS28,NDFIP1,STUB1,UBE4B,ATG7,MIB2,PRPF19,BIRC6,WDSUB1,MAP3K1,ITCH,PELI1,ANAPC2,PCNP,NEDD8,CBX8,FEM1A,ATG3,RING1,LRSAM1,RNF20,SUMO2,SIAH1,GTPBP4,CDC26,FBXW7,VCP,UBE2N,UBE2V2,UBE3A,UBB…
GO: Biological Process	GO:0034622	cellular macromolecular complex assembly		2.8e-05	181	632	TRIM24,ADD1,PRPF31,AHR,SYNJ1,H1FX,ARL2,RHOA,TMSB10,PICALM,ASF1A,NCK2,HIST1H2AC,HIST2H2AA3,HIST1H2BF,CAPZA1,CAPZA2,CALR,DENR,LSM14A,SMARCA5,EIF3J,EIF3H,EIF3A,EIF3B,AHCTF1,CD3E,CCNH,CDK5,EIF4EBP3,PSMG1,MTSS1,C20orf7,CDKN1B,MED24,MED12,AP2S1,CLNS1A,COX10,MED16,HDAC6,PAIP2,ARPC2,ACTR3,ARPC3,ARPC5,SNUPN,MIS12,NIP7,DDX1,NDUFS7,IPO4,LONP1,DIAPH2,DDX23,MED23,TBPL1,E2F3,H2AFY,EP300,EPB49,CLINT1,EIF4A2,EIF…
GO: Biological Process	GO:0007249	I-kappaB kinase/NF-kappaB cascade		3.4e-05	67	177	TNFSF14,TNFSF10,TRADD,BCL10,CFLAR,MAP3K14,BIRC2,RHOA,BCL3,IKBKG,CASP1,CD36,TNIP2,PTPLAD1,CHUK,G3BP2,TANK,TLR8,TRIM13,SNIP1,ECT2,LITAF,IKBKE,EEF1D,MALT1,TRAF3IP2,F2R,FLNA,NDFIP1,PRDX4,MIB2,IRAK2,IRF3,MIER1,IRAK1,LTB,LTA,LTBR,LGALS9,ATP2C1,SLC35B2,TMEM9B,MAP3K1,NLRP12,SLC44A2,PELI1,NFKBIB,NFKBIA,PPM1A,AZI2,RELA,REL,ZDHHC13,LY96,S100A12,S100A4,TLR1,TNFRSF1A,MAP3K7,STAT1,UBE2N,TRIP6,TRAF2,TRAF5,ZDHHC…
GO: Biological Process	GO:0006913	nucleocytoplasmic transport		9.5e-05	82	237	TNFSF14,ADAM10,MBTPS1,AKT1,RHOA,BCL3,BCL6,PTTG1IP,CAMK1,CALR,THOC5,UPF2,CDK5,NCKIPSD,THOC6,G3BP2,THOC1,SNUPN,RSRC1,CRY2,IPO4,RPL23,EP300,IPO13,CEP57,MALT1,THOC7,F2R,NUP50,AKAP13,FYB,FLNA,NUPL2,TACC3,GLE1,NDUFA13,NMD3,TXNIP,KHDRBS1,GSK3B,IPO7,HHEX,KPNA2,KPNA3,KPNB1,JUP,JAK2,SMAD4,LMNA,TNPO1,KPNA4,NLRP12,PPP1R12A,NCBP1,NUP107,NFKBIB,NFKBIA,PPP1CC,TMCO6,MAPK3,MAPK1,PKIA,PPP3CA,RBM22,UPF1,RAN,PTPN11,…
GO: Biological Process	GO:0016567	protein ubiquitination		0.000121	70	193	BCL10,AKT1,FBXL5,FBXL3,CDC16,TRIM23,ARRB2,AXIN1,HECTD1,BCL2,ANAPC13,BMI1,CDC23,RCHY1,CDK5,CDC34,RNF40,RBX1,HDAC6,LRRK2,TRIP12,UBE4A,ATG5,BAG5,UBE3C,OS9,FBXO11,VCPIP1,WWP2,WWP1,CBLL1,ZER1,VPS28,NDFIP1,STUB1,UBE4B,ATG7,MIB2,PRPF19,BIRC6,WDSUB1,MAP3K1,ITCH,PELI1,ANAPC2,PCNP,CBX8,FEM1A,ATG3,RING1,LRSAM1,RNF20,SIAH1,GTPBP4,CDC26,FBXW7,VCP,UBE2N,UBE2V2,UBE3A,UBB,UBE2A,UBE2B,UBE2D3,UBE2D2,UBE2E1,TSC1,SU…
GO: Biological Process	GO:0006793	phosphorus metabolic process		0.000125	315	1238	TRIM24,TRPM6,ACP5,GLYCTK,TNFRSF14,ACVR1,ADAM10,RNGTT,ADORA2A,PRPF4B,MTMR3,BCL10,SPHK1,AKT1,SYNJ2,AIF1,SYNJ1,PTPN22,STK19,ALPL,ANGPT1,SPAG9,MAP3K14,ATP6V0E1,ARAF,RPS6KA4,ARRB1,ARRB2,DYRK1B,ATM,PPP1R14B,ATP5C1,ATP5B,ATP5A1,MTMR6,ATP5D,ATP5F1,ATP6V1B2,ATP6V0C,ATP5J,ATP6V1A,ATP6V1E1,ATP6AP1,AXIN1,ATP5O,ATP7A,BCL2,PIP5K1B,ULK1,STK24,BLK,DUSP11,C5,CAMK1,ULK3,IBTK,MADD,CAD,PRKRA,MAPKAPK5,CDK10,NEK7,PPM1…
GO: Biological Process	GO:0006796	phosphate metabolic process		0.000125	315	1238	TRIM24,TRPM6,ACP5,GLYCTK,TNFRSF14,ACVR1,ADAM10,RNGTT,ADORA2A,PRPF4B,MTMR3,BCL10,SPHK1,AKT1,SYNJ2,AIF1,SYNJ1,PTPN22,STK19,ALPL,ANGPT1,SPAG9,MAP3K14,ATP6V0E1,ARAF,RPS6KA4,ARRB1,ARRB2,DYRK1B,ATM,PPP1R14B,ATP5C1,ATP5B,ATP5A1,MTMR6,ATP5D,ATP5F1,ATP6V1B2,ATP6V0C,ATP5J,ATP6V1A,ATP6V1E1,ATP6AP1,AXIN1,ATP5O,ATP7A,BCL2,PIP5K1B,ULK1,STK24,BLK,DUSP11,C5,CAMK1,ULK3,IBTK,MADD,CAD,PRKRA,MAPKAPK5,CDK10,NEK7,PPM1…
GO: Biological Process	GO:0051716	cellular response to stimulus		0.000132	275	1058	PARP1,ADM,AES,BCL10,AKT1,AHR,SYNJ2,ALKBH1,AKR1B1,ALOX5AP,ASH2L,AIP,ANXA1,ARRB1,ARRB2,RHOA,ATM,ATF4,AIFM1,SMC3,UNC119,C12orf44,GTF2H5,AXIN1,ATP7A,PRDX5,NIPBL,ASF1A,BCL2,BCL3,BCL6,ULK1,C3AR1,C5,IKBKG,CUL4B,CUL4A,ANKRD17,APPL1,CAT,CD36,NCOA1,SOCS1,CD14,DGAT1,BECN1,CCNH,CCNG1,CDC42,CD74,CD44,CHKA,PTPLAD1,SLK,CDKN2D,TTRAP,RB1CC1,TLK1,AP3S1,RBX1,DCLRE1A,CLN3,ACSL5,SH2D3C,HDAC6,CRY1,PDCD6IP,CRKL,ALKBH2,…
GO: Biological Process	GO:0051169	nuclear transport		0.000146	82	239	TNFSF14,ADAM10,MBTPS1,AKT1,RHOA,BCL3,BCL6,PTTG1IP,CAMK1,CALR,THOC5,UPF2,CDK5,NCKIPSD,THOC6,G3BP2,THOC1,SNUPN,RSRC1,CRY2,IPO4,RPL23,EP300,IPO13,CEP57,MALT1,THOC7,F2R,NUP50,AKAP13,FYB,FLNA,NUPL2,TACC3,GLE1,NDUFA13,NMD3,TXNIP,KHDRBS1,GSK3B,IPO7,HHEX,KPNA2,KPNA3,KPNB1,JUP,JAK2,SMAD4,LMNA,TNPO1,KPNA4,NLRP12,PPP1R12A,NCBP1,NUP107,NFKBIB,NFKBIA,PPP1CC,TMCO6,MAPK3,MAPK1,PKIA,PPP3CA,RBM22,UPF1,RAN,PTPN11,…
GO: Biological Process	GO:0016568	chromatin modification		0.000175	104	326	EED,ASH2L,ARRB1,ATM,NIPBL,ASF1A,BMI1,CBX4,HAT1,SMARCA5,CHD4,CHD1,SETD1A,HDAC4,MLL4,SIRT7,RNF40,SETDB1,TLK1,HDAC6,CREBBP,PHF21A,DAPK3,DNMT1,H2AFY,EP300,BPTF,MORF4L1,EHMT2,RUVBL2,SYCP3,BAZ1A,WDR5,SUV420H1,SAP18,HDAC2,USP16,NR3C1,JMJD1C,BRPF3,HMGA1,CHD8,CBX3,USP21,HDAC10,MEN1,L3MBTL2,MLL,ENY2,UTP3,ATXN7L3,UBN1,CBX8,TSPYL2,ASF1B,ARID2,PHF1,RING1,DMAP1,RBL2,RB1,RNF20,PRMT7,SMARCE1,SMARCD1,SMARCC2,SMAR…
GO: Biological Process	GO:0032268	regulation of cellular protein metabolic process		0.000212	173	614	TNFRSF14,ADD1,BCL10,SPHK1,AKT1,AIF1,ANGPT1,ARRB1,ARRB2,RHOA,TMSB10,AXIN1,NIPBL,BCL2,BCL3,ZFP36L1,LTBP4,NCK2,CAPZA1,CAPZA2,IBTK,CALR,LSM14A,CPEB2,EIF3J,EIF3H,EIF3A,EIF3B,SOCS1,CD6,CD4,CD3E,RCHY1,CCND3,CDK4,CDK5,EIF4EBP3,CD74,CD44,HDAC4,CHMP5,CDKN1B,RB1CC1,PIAS4,CLN3,HDAC6,PAIP2,ARPC2,ACTR3,ARPC3,ARPC5,NR1H3,CTNNB1,CSNK1D,TNK2,CSNK1E,LRRK2,DDX1,DNMT1,ECE1,ATG5,BAG5,SELT,EP300,EPB49,ENG,EIF4A2,EIF4B…
GO: Biological Process	GO:0006511	ubiquitin-dependent protein catabolic process		0.000214	88	264	AKT1,FBXL5,CDC16,BUB3,USP8,USP14,BAP1,ARIH1,USP11,USP9X,CUL4B,CUL4A,CUL2,CDC23,RCHY1,RNF40,PSMD6,USP15,USP3,RBX1,HDAC6,UCHL5,UBR5,USPL1,PSMD14,PSME3,CSNK1D,CSNK1E,UBE4A,FBXO31,PSMF1,OS9,FBXO11,GIPC1,ERLIN2,STUB1,UBE4B,USP16,HSP90AB1,MAD2L1,USP21,MAP3K1,ITCH,ANAPC2,PCNP,NEDD8,PPP2CB,NPLOC4,SELS,PSMC5,PSMC6,PSMB10,PSMC1,PSMC3,PSMD10,PSMD12,PSMB6,PSMB3,PSMB1,PSMA6,PSMA3,PSMA4,PSMA1,PSMA2,RNF20,SKP1,…
GO: Biological Process	GO:0006366	transcription from RNA polymerase II promoter		0.000229	263	1010	TRIM24,CCNK,SAP30,ABCA2,C19orf2,FUBP3,PARP1,IRF2BP1,AES,AHR,PER2,FUBP1,GMEB2,TSC22D1,PIAS2,ASH2L,TAF1C,ARRB1,ARRB2,RHOA,ASCL2,ATF4,ZFHX3,NMI,NRIP1,PRDM1,NIPBL,ZNF345,BCL3,BCL6,BTF3,BMI1,SDPR,CBX4,CSDA,LMO4,CALR,IRF2BP2,SMARCA5,NCOA1,CCNT1,CCNH,RFXANK,SKAP1,CHD4,CHD1,HDAC4,CEBPB,PIAS4,MED15,MED24,MED12,MAFB,MED16,MED6,CREBBP,PHF21A,NR1H3,SORBS3,CTNNB1,CTBP1,TRIM28,CEBPZ,MAPK14,DGKQ,DBP,TCEAL1,DNMT…
GO: Biological Process	GO:0000398	nuclear mRNA splicing, via spliceosome		0.00024	63	170	PRPF31,DHX38,CWC15,SF3B14,LSM8,CLNS1A,SNUPN,RSRC1,CSTF3,CSTF2,CDC40,DDX1,SFRS11,DDX23,SF3A3,HNRNPA0,RNPS1,PAPOLA,NUDT21,DBR1,SF3B4,SRRM1,SMNDC1,RBM25,GTF2F1,GTF2F2,PRPF8,LSM3,HNRNPL,HNRNPH2,HNRNPF,HNRNPD,HNRNPC,PRPF19,PTBP2,LSM2,SF4,UPF3B,MBNL1,YTHDC1,PCBP1,PCBP2,NCBP1,POLR2L,POLR2C,POLR2F,POLR2A,POLR2B,PTBP1,PRMT7,SNRPD2,SNRPB,SNRPC,SNRPA,SFRS1,SFRS2,SFRS5,SFRS6,SRPK2,DNAJC8,NCBP2,SF3A2,SF3B1
GO: Biological Process	GO:0000377	RNA splicing, via transesterification reactions with bulged adenosine as nucleophile		0.00024	63	170	PRPF31,DHX38,CWC15,SF3B14,LSM8,CLNS1A,SNUPN,RSRC1,CSTF3,CSTF2,CDC40,DDX1,SFRS11,DDX23,SF3A3,HNRNPA0,RNPS1,PAPOLA,NUDT21,DBR1,SF3B4,SRRM1,SMNDC1,RBM25,GTF2F1,GTF2F2,PRPF8,LSM3,HNRNPL,HNRNPH2,HNRNPF,HNRNPD,HNRNPC,PRPF19,PTBP2,LSM2,SF4,UPF3B,MBNL1,YTHDC1,PCBP1,PCBP2,NCBP1,POLR2L,POLR2C,POLR2F,POLR2A,POLR2B,PTBP1,PRMT7,SNRPD2,SNRPB,SNRPC,SNRPA,SFRS1,SFRS2,SFRS5,SFRS6,SRPK2,DNAJC8,NCBP2,SF3A2,SF3B1
GO: Biological Process	GO:0000375	RNA splicing, via transesterification reactions		0.000335	64	175	PRPF31,DHX38,CWC15,SF3B14,LSM8,CLNS1A,SNUPN,RSRC1,CSTF3,CSTF2,CDC40,DDX1,SFRS11,DDX23,SF3A3,HNRNPA0,RNPS1,PAPOLA,NUDT21,DBR1,SF3B4,SRRM1,SMNDC1,RBM25,GTF2F1,GTF2F2,PRPF8,LSM1,LSM3,HNRNPL,HNRNPH2,HNRNPF,HNRNPD,HNRNPC,PRPF19,PTBP2,LSM2,SF4,UPF3B,MBNL1,YTHDC1,PCBP1,PCBP2,NCBP1,POLR2L,POLR2C,POLR2F,POLR2A,POLR2B,PTBP1,PRMT7,SNRPD2,SNRPB,SNRPC,SNRPA,SFRS1,SFRS2,SFRS5,SFRS6,SRPK2,DNAJC8,NCBP2,SF3A2,SF3…
GO: Biological Process	GO:0007005	mitochondrion organization		0.000371	69	194	KIAA1279,AKT1,SYNJ2,AIP,SLC25A4,AIFM1,ATP5C1,ATP5B,ATP5A1,DNAJA3,ATP5D,ATP5F1,ATP5J,ATP5O,ATP7A,BCL2,TSPO,SLC25A20,CAV2,C20orf7,TOMM20,TOMM70A,COX10,CPT2,DNM1L,SLC25A13,NDUFS7,LONP1,C3orf31,STARD3,PRDX3,GRPEL2,RRM2B,IFI6,FXN,ATP5H,TIMM44,TRNT1,TIMM17B,DUSP18,ATP5L,HSP90AA1,HSPA4,SHARPIN,MPV17,MTX1,C10orf2,MAN2A1,MAP3K1,MYC,NDUFS5,GOLPH3,POLRMT,TFB2M,PPP2R2B,PMAIP1,MRPL15,GIMAP1,PEX5,SLC25A1,MRPL1…
GO: Biological Process	GO:0031324	negative regulation of cellular metabolic process		0.000389	227	855	TRIM24,SAP30,ACADVL,ACP5,ADD1,EED,IRF2BP1,AES,AKT1,PER2,BTAF1,ARRB2,DEDD,TMSB10,ASCL2,ZFHX3,SMC3,NRIP1,PRDM1,NIPBL,ASF1A,ZNF345,BCL3,BCL6,BMI1,CBX4,CSDA,CAPZA1,CAPZA2,IBTK,HAT1,CALR,IRF2BP2,SMARCA5,SOCS1,CDK5,COBRA1,EIF4EBP3,BCLAF1,HDAC4,CDKN2D,ZEB2,CDKN1B,SIRT7,PIAS4,CLN3,HDAC6,PAIP2,PHF21A,NR1H3,CTBP2,SORBS3,CTNNB1,CTBP1,TRIM28,CST3,DAXX,TCEAL1,DNMT1,ATG5,BAG5,DR1,EP300,EPB49,ENG,NCOR2,SIGIRR,B…
GO: Cellular Component	GO:0030529	ribonucleoprotein complex		0	222	544	RPL10L,ABCF1,ACTB,ACTN4,PRPF31,PRPF4B,DCP2,MRPL52,DAZAP1,LSM4,DGCR14,MRPL49,CANX,CSDA,CALR,PRPF18,LSM14A,MRPS35,RPL36,SYF2,CDC5L,DHX38,CWC15,LARP7,MVP,LSM8,MRPL30,HNRPDL,PDCD7,WAC,CDC40,MRP63,PRMT3,DDX41,NOC4L,DDX5,DDX1,RPL23,DDX23,DHX15,EEF2,UTP14C,FAU,SF3A3,HNRNPA0,RUVBL2,RPP40,POP4,EDC3,NUP50,RPL35,FRG1,MRPL3,FTL,MRPL55,SYNCRIP,MRPS2,UTP18,MRPL4,MRPL2,MRPS18C,MRPS16,SF3B4,MRPS31,SRRM1,POP7,SMN…
GO: Cellular Component	GO:0005654	nucleoplasm		0	330	1035	SAP30,ACTB,EED,C19orf2,RNGTT,RNMT,PARP1,INTS1,PRPF31,AKT1,AHR,CDC16,PIAS2,ASH2L,INTS6,ANXA11,TAF1B,TAF1C,ATM,ATF4,ZFHX3,MTA1,NRIP1,LSM4,RBM10,ASF1A,STK24,BMI1,LMO4,CALM3,PRPF18,SMARCA5,OGT,APPL1,CBFA2T3,SNAI3,CDC23,AHCTF1,RCHY1,INTS7,CCNT1,CCNH,CDK4,COBRA1,CDC25B,RTCD1,CDC5L,CHD4,SETD1A,HDAC4,MLL4,DAZAP2,TTRAP,LARP7,MED15,MED24,DDX46,MED12,MAFB,MED16,HDAC6,MED6,ALKBH2,CREBBP,THOC1,WAC,RSRC1,PHF21…
GO: Cellular Component	GO:0005739	mitochondrion		0	431	1475	SUCLA2,ABCB7,ACACA,ACADM,ACADS,ACADVL,ACLY,ACOX1,FDX1L,GLYCTK,RAB11A,GBF1,ADSL,WSB1,KIAA1279,RDH13,SYNJ2,ALDH9A1,ALAS2,ABCD1,ALDOA,MRPL52,DAZAP1,NFS1,SLC25A4,ANXA1,ARAF,RHOA,FIBP,ZFHX3,AIFM1,ATP5C1,ATP5B,ATP5A1,DNAJA3,BAD,ATP5D,ATP5F1,ATP5J,ATP6V1A,ATP6V1E1,ATP5O,CLPP,PRDX5,BCAT2,BCKDHA,BCL2,BSG,SLC25A11,BNIP3L,MRPL49,TSPO,AGPS,HIGD1A,SLC25A20,AKR7A2,NIF3L1,MRPS35,CCDC90B,ELAC2,NIPSNAP1,CAT,PNPT1…
GO: Cellular Component	GO:0033279	ribosomal subunit		0	76	132	RPL10L,MRPL52,MRPS35,RPL36,FAU,RPL35,MRPL3,FTL,MRPL55,MRPS2,MRPL2,MRPS18C,MRPS16,HBA2,RPSA,RPL7L1,MRPS6,MRPL34,MRPL32,MRPS25,MRPL22,MRPL15,RPL6,RPL9,RPL8,RPL11,RPL17,RPL18,RPL19,RPL18A,MRPL13,RPL3,RPL5,MRPL42,MRPS18B,MRPS14,MRPS21,RPS6,RPS5,RPS9,RPS12,RPS10,RPS11,RPLP1,MRPS12,MRPL12,RPLP2,RPS2,RPS3A,RPS3,RPL32,RPL34,RPL38,RPL39,RPL41,RPL21,RPL22,MRPL23,RPL24,RPL27A,RPS24,RPS25,RPS20,RPS27,RPS27A,…
GO: Cellular Component	GO:0005840	ribosome		0	101	213	RPL10L,ABCF1,MRPL52,MRPL49,CANX,MRPS35,RPL36,MRPL30,MRP63,PRMT3,RPL23,FAU,RPL35,MRPL3,FTL,MRPL55,MRPS2,MRPL4,MRPL2,MRPS18C,MRPS16,MRPS31,HBA2,MRPL28,SERP1,NUFIP2,RPSA,MRPL44,RPL7L1,MRPL47,RPL10A,MRPS34,MRPS6,MRPL38,MRPL34,MRPL32,MRPS25,MRPL22,MRPL15,MRPL18,RPL6,RPL9,RPL8,RPL11,RPL12,RPL17,RPL15,RPL18,RPL19,RPL18A,MRPL13,RPL3,RPL5,MRPL42,MRPS18B,MRPS14,MRPS21,RPS6,RPS5,RPS6KB1,RPS9,RPS12,RPS10,RPS…
GO: Cellular Component	GO:0044445	cytosolic part		0	81	162	RPL10L,C19orf2,PRDX5,IKBKG,RPL36,CHUK,CTNNB1,MAPK14,RPL23,CYB5R3,ENO2,FAU,PRDX3,GIPC1,RPL35,FTL,BLOC1S1,GUCY1A3,HBA2,HBB,IDE,PDRG1,RPSA,DAPP1,PFKL,PFDN5,PFDN1,PIK3CA,PIK3CB,PIK3CG,PIK3R1,RPL6,RPL9,RPL8,RPL11,RPL18,RPL19,RPL18A,RPL3,RPL5,RPS6,RPS5,RPS9,RPS12,RPS10,RPS11,RPLP1,RPLP2,RPS2,RPS3A,RPS3,RPL32,RPL34,RPL38,RPL39,RPL41,RPL21,RPL22,RPL24,RPL27A,RPS24,RPS25,RPS20,RPS27,RPS27A,RPS28,RPS29,RPS…
GO: Cellular Component	GO:0022626	cytosolic ribosome		0	51	82	RPL10L,RPL36,RPL23,FAU,RPL35,FTL,HBA2,RPSA,RPL6,RPL9,RPL8,RPL11,RPL18,RPL19,RPL18A,RPL3,RPL5,RPS6,RPS5,RPS9,RPS12,RPS10,RPS11,RPLP1,RPLP2,RPS2,RPS3A,RPS3,RPL32,RPL34,RPL38,RPL39,RPL41,RPL21,RPL22,RPL24,RPL27A,RPS24,RPS25,RPS20,RPS27,RPS27A,RPS28,RPS29,RPS14,RPS15A,RPS19,RPS16,RPS17,UBB,UBA52
GO: Cellular Component	GO:0044451	nucleoplasm part		0	225	714	SAP30,ACTB,EED,C19orf2,PARP1,INTS1,PRPF31,AHR,PIAS2,ASH2L,INTS6,TAF1B,TAF1C,ATF4,ZFHX3,MTA1,NRIP1,RBM10,ASF1A,BMI1,LMO4,PRPF18,SMARCA5,OGT,APPL1,SNAI3,RCHY1,INTS7,CCNH,CDK4,CDC5L,CHD4,SETD1A,HDAC4,MLL4,DAZAP2,TTRAP,MED15,MED24,DDX46,MED12,MAFB,MED16,HDAC6,MED6,CREBBP,THOC1,WAC,RSRC1,PHF21A,CTBP2,CTNNB1,CTBP1,TOPORS,DDX3X,DGKQ,DAXX,GTF3C5,GTF3C3,MED23,TBPL1,E2F3,DYRK1A,C16orf53,EP300,NCOR2,ELF4,CO…
GO: Cellular Component	GO:0031967	organelle envelope		0	225	741	ABCB7,ACADVL,PARP1,INTS1,SYNJ2,ALAS2,ALOX5,ALOX5AP,ANXA11,ANXA7,SLC25A4,ANXA1,AIFM1,ATP5C1,ATP5B,ATP5A1,MTMR6,ATP2A3,BAD,ATP5D,ATP5F1,ATP5J,UNC84B,ATP5O,BCL2,TAGLN2,SLC25A11,BNIP3L,BNIP2,TSPO,MAD1L1,SLC25A20,NIPSNAP1,CAT,TOR1AIP1,PNPT1,AHCTF1,UNC50,MATR3,C20orf7,TMEM14C,TOMM20,SCRN1,SLC25A19,TOMM70A,MVP,BRP44L,CLIC1,ACSL5,COX10,COX7B,COX7A2,COX6C,LASS6,CRAT,CPT2,SNUPN,COX5B,DNM1L,ABCF2,COX4I1,C3o…
GO: Cellular Component	GO:0015935	small ribosomal subunit		0	40	64	MRPS35,FAU,FTL,MRPS2,MRPS18C,MRPS16,HBA2,RPSA,MRPS6,MRPS25,MRPL42,MRPS18B,MRPS14,MRPS21,RPS6,RPS5,RPS9,RPS12,RPS10,RPS11,MRPS12,RPS2,RPS3A,RPS3,RPS24,RPS25,RPS20,RPS27,RPS27A,RPS28,RPS29,RPS14,RPS15A,RPS19,RPS16,RPS17,MRPS36,UBB,UBA52,DAP3
GO: Cellular Component	GO:0012505	endomembrane system		0	394	1479	PLDN,ACTN1,ADAM10,B3GALT4,MBTPS1,GPAA1,GBF1,AP3D1,PARP1,ADORA2A,INTS1,AP1G2,AP1S2,AP1B1,AP2A2,AP2A1,AP1G1,SLC5A6,B3GAT3,ALOX5,ALOX5AP,ANXA3,ANXA11,ANXA7,ANPEP,HIP1R,TRIM23,ARF1,PLOD3,ARRB1,ARRB2,PCSK7,FIBP,MTMR6,ATP2A3,ATP2A2,B2M,PICALM,ATP6V1B2,UNC84B,BCL2,PIP5K1B,BSG,ULK1,TAGLN2,NCK2,BNIP3L,BNIP2,MAD1L1,CANX,GORASP2,DEGS1,ELOVL5,TPST2,APPL1,CAV2,CBFA2T3,TOR1AIP1,ENTPD6,CD36,CD9,B4GALT4,CD4,DGAT…
GO: Cellular Component	GO:0031975	envelope		0	226	753	ABCB7,ACADVL,PARP1,INTS1,SYNJ2,ALAS2,ALOX5,ALOX5AP,ANXA11,ANXA7,SLC25A4,ANXA1,AIFM1,ATP5C1,ATP5B,ATP5A1,MTMR6,ATP2A3,BAD,ATP5D,ATP5F1,ATP5J,UNC84B,ATP5O,BCL2,TAGLN2,SLC25A11,BNIP3L,BNIP2,TSPO,MAD1L1,SLC25A20,NIPSNAP1,CAT,TOR1AIP1,PNPT1,AHCTF1,UNC50,MATR3,C20orf7,TMEM14C,TOMM20,SCRN1,SLC25A19,TOMM70A,MVP,BRP44L,CLIC1,ACSL5,COX10,COX7B,COX7A2,COX6C,LASS6,CRAT,CPT2,SNUPN,COX5B,DNM1L,ABCF2,COX4I1,C3o…
GO: Cellular Component	GO:0044429	mitochondrial part		0	205	670	ABCB7,ACADM,ACADS,ACADVL,FDX1L,SYNJ2,ALAS2,MRPL52,NFS1,SLC25A4,ANXA1,AIFM1,ATP5C1,ATP5B,ATP5A1,DNAJA3,BAD,ATP5D,ATP5F1,ATP5J,ATP5O,CLPP,BCKDHA,BCL2,SLC25A11,BNIP3L,TSPO,SLC25A20,MRPS35,NIPSNAP1,CAT,PNPT1,C20orf7,TMEM14C,TOMM20,SLC25A19,TOMM70A,BRP44L,ACSL5,COX10,COX7B,COX7A2,COX6C,MRPL30,CRAT,CPT2,COX5B,DNM1L,ABCF2,COX4I1,C3orf1,SLC25A13,LRPPRC,MRP63,CS,LRRK2,NLRX1,NDUFS7,CYC1,NARS2,SLC25A22,LONP…
GO: Cellular Component	GO:0005768	endosome		0	129	368	PLDN,RAB11A,CD164,SNX3,AP1G2,GAPVD1,ANXA2,ARSA,TMEM9,B2M,ATP6V1E1,UNC84B,ATP7A,STX7,APPL1,GGA1,NUMB,CD4,VAMP4,VAMP8,CHMP2B,CD79A,CD74,ZFYVE16,SNX17,CHMP5,EXOC4,VPS24,CLCN6,VPS29,CLN3,TOM1,BET1L,SCAMP2,TLR8,UNC13D,WASF2,MITD1,STX6,CST3,CHMP6,VPS37B,TM9SF2,DIAPH2,ECE1,SCAMP1,VPS26A,RAB11FIP3,STARD3,EHD1,PRDX3,CYBASC3,STX2,EPS15,RAB11FIP1,NISCH,PTP4A3,FAM125B,RIN3,RAB31,VPS28,SDF4,SLC9A6,VPS36,ABCA7…
GO: Cellular Component	GO:0005730	nucleolus		0	253	881	TRIM24,FGF18,IQGAP1,ACTN1,ACTN4,ADAR,PARP1,FUBP1,DAZAP1,INTS6,TAF1B,TAF1C,ZMYM6,ARHGAP4,BUB3,DEDD,DDX21,MTA1,USP8,DGCR14,SMARCA5,CBFA2T3,CASP1,RPL36,CCNT1,ZNF385A,CDK5,NOL11,CDC5L,CHM,MLL4,ARHGEF11,SIRT7,CEBPE,MBIP,KEAP1,SETDB1,USP15,ZFR,MED12,NLK,CYB5R1,DDX47,CXorf26,PQBP1,ZNF655,CSTF2,TRIM28,NIP7,DNAL4,TMEM109,PSMD14,NOL7,TRIM13,TSEN34,NOC4L,DDX5,SFRS11,TAOK2,RPL23,GMFG,WTAP,EP300,NCOR2,UTP14C,…
GO: Cellular Component	GO:0022627	cytosolic small ribosomal subunit		0	27	38	FAU,FTL,HBA2,RPSA,RPS6,RPS5,RPS9,RPS12,RPS10,RPS11,RPS2,RPS3A,RPS3,RPS24,RPS25,RPS20,RPS27,RPS27A,RPS28,RPS29,RPS14,RPS15A,RPS19,RPS16,RPS17,UBB,UBA52
GO: Cellular Component	GO:0005625	soluble fraction		0	143	457	ACACA,TNFRSF6B,ACTB,TNFSF10,ACTG1,ADM,ADSL,AGL,SPHK1,AKT1,ALOX5,ANXA7,APAF1,ANPEP,ANXA2,ARRB1,RHOA,AIFM1,USP14,UNC119,PGLS,NSMAF,C5,CAPN2,CAD,YARS,CD40LG,CLIC4,CCS,CLIC1,CTSD,CTSB,UBR5,CRYZ,MAPK14,CSNK1G3,CSNK1D,CSNK1A1,CSNK1G2,DARS,CD55,CYB5R3,GGPS1,RAB8B,DUSP6,DPYD,DPP4,ENO2,CORO7,FARSA,ACSL1,YWHAQ,OS9,STX2,EPRS,GIPC1,WDR6,G6PD,GAA,FLT3LG,GLO1,GLA,SDF4,GFPT1,CALCOCO2,GCHFR,GBE1,GYS1,GYG1,PMVK,H…
GO: Cellular Component	GO:0015934	large ribosomal subunit		1e-06	36	70	RPL10L,MRPL52,RPL36,RPL35,MRPL3,MRPL55,MRPL2,RPL7L1,MRPL34,MRPL32,MRPL22,MRPL15,RPL6,RPL9,RPL8,RPL11,RPL17,RPL18,RPL19,RPL18A,MRPL13,RPL3,RPL5,RPLP1,MRPL12,RPLP2,RPL32,RPL34,RPL38,RPL39,RPL41,RPL21,RPL22,MRPL23,RPL24,RPL27A
GO: Cellular Component	GO:0031988	membrane-bounded vesicle		1e-06	203	726	ABCA2,SNAP23,ACTN1,ACTN4,RAB11A,ADAM10,AP1G2,AP1S2,AP1B1,AP2A2,AP2A1,AP1G1,AHCY,HERC3,SPHK1,SLC5A6,ALDOA,BIN1,SPAG9,ANXA3,ANXA11,ANPEP,HIP1R,ANXA2,CHIC2,ARSA,ARRB1,ARRB2,ARHGDIB,ATM,USP14,ATP1B3,AZU1,PICALM,ATP6V1B2,AXIN1,ATP7A,YIPF3,BSG,ULK1,NCK2,CANX,APPL1,CAV2,CD36,CD9,BECN1,PTPN23,CLIC4,LRBA,MTSS1,CEL,KIAA0174,PIGT,AP2M1,AP2S1,AP3S1,CLK3,CLN3,GOLGA5,CLTC,PDCD6IP,SCAMP2,COPB1,UNC13D,CTNNA1,CTS…
GO: Cellular Component	GO:0005794	Golgi apparatus		1e-06	268	1017	TRPM6,GLYCTK,RAB11A,ADAM10,B3GALT4,MBTPS1,GBF1,AP3D1,AP1G2,AP1S2,AP1B1,AP2A1,AP1G1,B3GAT3,TRAPPC6B,CHIC2,TRIM23,ARF1,ARF5,ARSA,ARL2,ARHGAP4,PCSK7,B2M,PICALM,ATP6V1B2,ATP6V0C,TBC1D22A,ATP7A,NCOA3,YIPF3,BSG,STX7,C11orf2,GNPDA2,GORASP2,AKR7A2,TPST2,CAV2,CBFA2T3,GGA1,CAT,ENTPD6,CD36,B4GALT4,SCOC,BECN1,STX10,VAMP4,CDC42,LRBA,UNC50,CD79B,CD74,CD44,USO1,PPAP2B,SLC35A4,SNX17,ARHGEF11,CEL,LARP7,MED15,ERGI…
GO: Cellular Component	GO:0005740	mitochondrial envelope		2e-06	145	485	ABCB7,ACADVL,SYNJ2,ALAS2,SLC25A4,ANXA1,AIFM1,ATP5C1,ATP5B,ATP5A1,BAD,ATP5D,ATP5F1,ATP5J,ATP5O,BCL2,SLC25A11,BNIP3L,TSPO,SLC25A20,NIPSNAP1,CAT,PNPT1,C20orf7,TMEM14C,TOMM20,SLC25A19,TOMM70A,BRP44L,ACSL5,COX10,COX7B,COX7A2,COX6C,CRAT,CPT2,COX5B,DNM1L,ABCF2,COX4I1,C3orf1,SLC25A13,LRRK2,NLRX1,NDUFS7,CYC1,SLC25A22,COX5A,CYB5R3,PMPCB,C3orf31,SLC25A44,SLC27A3,RHOT2,ACSL3,ACSL1,GRPEL2,ETFDH,COQ10B,GLUD1,A…
GO: Cellular Component	GO:0016023	cytoplasmic membrane-bounded vesicle		4e-06	195	704	ABCA2,SNAP23,ACTN1,ACTN4,RAB11A,ADAM10,AP1G2,AP1S2,AP1B1,AP2A2,AP2A1,AP1G1,AHCY,HERC3,SPHK1,ALDOA,BIN1,SPAG9,ANXA3,ANXA11,HIP1R,ANXA2,CHIC2,ARSA,ARRB1,ARRB2,ARHGDIB,ATM,USP14,ATP1B3,AZU1,PICALM,ATP6V1B2,AXIN1,ATP7A,YIPF3,BSG,ULK1,CANX,CAV2,CD36,CD9,BECN1,PTPN23,CLIC4,LRBA,MTSS1,CEL,KIAA0174,PIGT,AP2M1,AP2S1,AP3S1,CLK3,CLN3,GOLGA5,CLTC,PDCD6IP,SCAMP2,COPB1,UNC13D,CTNNA1,CTSD,CTSB,STX6,FLOT1,TRPV2,…
GO: Cellular Component	GO:0031982	vesicle		7e-06	215	797	ABCA2,SNAP23,ACTN1,ACTN4,RAB11A,ADAM10,AP1G2,AP1S2,AP1B1,AP2A2,AP2A1,AP1G1,AHCY,HERC3,SPHK1,SLC5A6,ALDOA,BIN1,SPAG9,ANXA3,ANXA11,ANXA7,ANPEP,HIP1R,ANXA2,CHIC2,ARSA,ARRB1,ARRB2,ARHGDIB,ATM,USP14,ATP1B3,AZU1,PICALM,ATP6V1B2,AXIN1,ATP7A,YIPF3,BSG,ULK1,NCK2,CANX,APPL1,CAV2,CD36,CD9,BECN1,PTPN23,CLIC4,LRBA,MTSS1,CETP,CEL,KIAA0174,PIGT,AP2M1,AP2S1,AP3S1,CLCN7,CLK3,CLN3,GOLGA5,CLTC,PDCD6IP,SCAMP2,COPB1,…
GO: Cellular Component	GO:0042470	melanosome		1.1e-05	42	95	AHCY,ANXA11,ANXA2,ATP1B3,ATP6V1B2,BSG,CANX,CLTC,PDCD6IP,CTSD,CTSB,FLOT1,TRPV2,SEC22B,TMED10,ERP29,RAB35,GCHFR,GNA13,HSP90AB1,HSP90AA1,ITGB1,LAMP1,SND1,P4HB,MYO5A,NAP1L1,RAN,RAB5A,RAB27A,RAB5C,SLC3A2,SDCBP,RPN1,SYPL1,TMEM33,YWHAZ,YWHAB,YWHAE,SYTL1,HSP90B1,RAB7A
GO: Cellular Component	GO:0048770	pigment granule		1.1e-05	42	95	AHCY,ANXA11,ANXA2,ATP1B3,ATP6V1B2,BSG,CANX,CLTC,PDCD6IP,CTSD,CTSB,FLOT1,TRPV2,SEC22B,TMED10,ERP29,RAB35,GCHFR,GNA13,HSP90AB1,HSP90AA1,ITGB1,LAMP1,SND1,P4HB,MYO5A,NAP1L1,RAN,RAB5A,RAB27A,RAB5C,SLC3A2,SDCBP,RPN1,SYPL1,TMEM33,YWHAZ,YWHAB,YWHAE,SYTL1,HSP90B1,RAB7A
GO: Cellular Component	GO:0005759	mitochondrial matrix		2.1e-05	82	243	ACADM,ACADS,ACADVL,FDX1L,ALAS2,MRPL52,NFS1,ATP5C1,ATP5B,ATP5A1,DNAJA3,ATP5D,ATP5F1,CLPP,BCKDHA,MRPS35,MRPL30,LRPPRC,MRP63,CS,NARS2,LONP1,DLD,PMPCB,COQ3,FH,GRPEL2,ETFDH,ETFB,ETFA,MRPL3,MRPL55,FXN,GLUD1,TIMM44,MRPL2,MRPS18C,MRPS16,HADH,MRPL28,AK3,NR3C1,IDH3G,IDH3B,HSPD1,C10orf2,ME2,MDH2,OGDH,RARS2,NDUFAB1,MRPL47,MRPL38,MRPL34,MRPL32,POLRMT,TFB2M,PDHB,DDX28,MRPS25,MRPL15,MRPL18,MRPL13,MRPL42,MRPS18B…
GO: Cellular Component	GO:0031980	mitochondrial lumen		2.1e-05	82	243	ACADM,ACADS,ACADVL,FDX1L,ALAS2,MRPL52,NFS1,ATP5C1,ATP5B,ATP5A1,DNAJA3,ATP5D,ATP5F1,CLPP,BCKDHA,MRPS35,MRPL30,LRPPRC,MRP63,CS,NARS2,LONP1,DLD,PMPCB,COQ3,FH,GRPEL2,ETFDH,ETFB,ETFA,MRPL3,MRPL55,FXN,GLUD1,TIMM44,MRPL2,MRPS18C,MRPS16,HADH,MRPL28,AK3,NR3C1,IDH3G,IDH3B,HSPD1,C10orf2,ME2,MDH2,OGDH,RARS2,NDUFAB1,MRPL47,MRPL38,MRPL34,MRPL32,POLRMT,TFB2M,PDHB,DDX28,MRPS25,MRPL15,MRPL18,MRPL13,MRPL42,MRPS18B…
GO: Cellular Component	GO:0005681	spliceosomal complex		2.7e-05	54	139	PRPF31,PRPF4B,LSM4,DGCR14,PRPF18,SYF2,CDC5L,DHX38,CWC15,PDCD7,WAC,CDC40,DDX41,DDX5,DDX23,DHX15,SF3A3,FRG1,SYNCRIP,SF3B4,SRRM1,SMNDC1,C19orf29,IVNS1ABP,PRPF8,LSM3,HNRNPF,HNRNPC,PRPF19,PTBP2,LSM2,SF4,PABPC1,XAB2,PNN,PPP1R8,RNPC3,PLRG1,RBM22,ZMAT5,SNRPN,SNRPD2,SNRPB,SNRPC,SNRPA,SFRS1,SFRS2,U2AF1L4,TFIP11,RALY,SF3A2,PPWD1,SF3B1,SKIV2L2
GO: Cellular Component	GO:0005769	early endosome		2.8e-05	52	132	SNX3,ANXA2,B2M,STX7,APPL1,NUMB,CD4,VAMP8,ZFYVE16,SNX17,CLN3,TOM1,WASF2,STX6,DIAPH2,EHD1,PRDX3,EPS15,NISCH,PTP4A3,RIN3,RAB31,SLC9A6,STAM2,STAMBP,MIB2,VPS4A,RABGEF1,HLA-A,HSPD1,RPS6KC1,ALS2,VPS18,WDFY1,SNX27,NIPA2,VPS41,RAB22A,GRIPAP1,VPS16,FURIN,ZFYVE20,RAB5A,RAB5C,C14orf133,SH3GL1,SIAH1,SGK3,RAB21,PTP4A2,ANKRD27,PTP4A1
GO: Cellular Component	GO:0031410	cytoplasmic vesicle		2.8e-05	203	756	ABCA2,SNAP23,ACTN1,ACTN4,RAB11A,ADAM10,AP1G2,AP1S2,AP1B1,AP2A2,AP2A1,AP1G1,AHCY,HERC3,SPHK1,ALDOA,BIN1,SPAG9,ANXA3,ANXA11,HIP1R,ANXA2,CHIC2,ARSA,ARRB1,ARRB2,ARHGDIB,ATM,USP14,ATP1B3,AZU1,PICALM,ATP6V1B2,AXIN1,ATP7A,YIPF3,BSG,ULK1,CANX,CAV2,CD36,CD9,BECN1,PTPN23,CLIC4,LRBA,MTSS1,CEL,KIAA0174,PIGT,AP2M1,AP2S1,AP3S1,CLCN7,CLK3,CLN3,GOLGA5,CLTC,PDCD6IP,SCAMP2,COPB1,UNC13D,CTNNA1,CTSD,CTSB,STX6,FLOT1,…
GO: Cellular Component	GO:0022625	cytosolic large ribosomal subunit		2.8e-05	23	39	RPL10L,RPL36,RPL35,RPL6,RPL9,RPL8,RPL11,RPL18,RPL19,RPL18A,RPL3,RPL5,RPLP1,RPLP2,RPL32,RPL34,RPL38,RPL39,RPL41,RPL21,RPL22,RPL24,RPL27A
GO: Cellular Component	GO:0031966	mitochondrial membrane		3.3e-05	135	462	ABCB7,ACADVL,SYNJ2,ALAS2,SLC25A4,ANXA1,AIFM1,ATP5C1,ATP5B,ATP5A1,BAD,ATP5D,ATP5F1,ATP5J,ATP5O,BCL2,SLC25A11,TSPO,SLC25A20,NIPSNAP1,C20orf7,TMEM14C,TOMM20,SLC25A19,TOMM70A,BRP44L,ACSL5,COX10,COX7B,COX7A2,COX6C,CRAT,CPT2,COX5B,DNM1L,COX4I1,C3orf1,SLC25A13,LRRK2,NLRX1,NDUFS7,CYC1,SLC25A22,COX5A,CYB5R3,PMPCB,C3orf31,SLC25A44,SLC27A3,RHOT2,ACSL3,ACSL1,GRPEL2,ETFDH,COQ10B,GLUD1,ATP5H,SLC9A6,TIMM44,CYB5…
GO: Cellular Component	GO:0010008	endosome membrane		4.1e-05	65	181	RAB11A,CD164,AP1G2,TMEM9,B2M,UNC84B,STX7,APPL1,GGA1,CHMP2B,ZFYVE16,CHMP5,VPS24,CLCN6,VPS29,SCAMP2,TLR8,MITD1,CHMP6,VPS37B,TM9SF2,ECE1,SCAMP1,VPS26A,RAB11FIP3,STARD3,EHD1,CYBASC3,EPS15,FAM125B,VPS28,SLC9A6,ABCA7,RABEPK,STAM2,VPS4A,HLA-A,VPS18,LAMP1,LAMP2,RAB22A,CHMP7,VPS16,ZFYVE20,TMEM55A,SLC39A4,SCYL2,VAC14,TMEM55B,CHMP4A,RAB5A,RAB5C,SLC11A1,SH3GL1,SHC1,VPS52,VAMP7,ARL8B,VPS37C,RAB11FIP2,VPS37A,R…
GO: Cellular Component	GO:0035097	histone methyltransferase complex		4.3e-05	30	60	ACTB,EED,PRPF31,ASH2L,OGT,SETD1A,MLL4,C16orf53,RUVBL2,WDR5,MCRS1,HCFC1,HDAC2,CHD8,STK38,PELP1,MAX,MEN1,MLL,PPP1CB,PPP1CC,PPP1CA,C17orf49,KIAA1267,TAF7,TAF6,MYST1,SUZ12,SETD1B,CXXC1
GO: Cellular Component	GO:0034708	methyltransferase complex		4.3e-05	30	60	ACTB,EED,PRPF31,ASH2L,OGT,SETD1A,MLL4,C16orf53,RUVBL2,WDR5,MCRS1,HCFC1,HDAC2,CHD8,STK38,PELP1,MAX,MEN1,MLL,PPP1CB,PPP1CC,PPP1CA,C17orf49,KIAA1267,TAF7,TAF6,MYST1,SUZ12,SETD1B,CXXC1
GO: Cellular Component	GO:0044440	endosomal part		5.2e-05	65	182	RAB11A,CD164,AP1G2,TMEM9,B2M,UNC84B,STX7,APPL1,GGA1,CHMP2B,ZFYVE16,CHMP5,VPS24,CLCN6,VPS29,SCAMP2,TLR8,MITD1,CHMP6,VPS37B,TM9SF2,ECE1,SCAMP1,VPS26A,RAB11FIP3,STARD3,EHD1,CYBASC3,EPS15,FAM125B,VPS28,SLC9A6,ABCA7,RABEPK,STAM2,VPS4A,HLA-A,VPS18,LAMP1,LAMP2,RAB22A,CHMP7,VPS16,ZFYVE20,TMEM55A,SLC39A4,SCYL2,VAC14,TMEM55B,CHMP4A,RAB5A,RAB5C,SLC11A1,SH3GL1,SHC1,VPS52,VAMP7,ARL8B,VPS37C,RAB11FIP2,VPS37A,R…
GO: Cellular Component	GO:0044431	Golgi apparatus part		6.2e-05	157	561	RAB11A,ADAM10,B3GALT4,MBTPS1,GBF1,AP3D1,AP1G2,AP1S2,AP1B1,AP2A1,AP1G1,B3GAT3,CHIC2,TRIM23,ARF1,PCSK7,B2M,ATP7A,BSG,GORASP2,TPST2,CAV2,CBFA2T3,GGA1,ENTPD6,B4GALT4,BECN1,STX10,VAMP4,CDC42,LRBA,UNC50,USO1,SLC35A4,PJA2,AP3S1,DOPEY2,CLN3,GOLGA5,CLTC,CPD,ACTR3,BET1L,SCAMP3,SCAMP2,DNM1L,COPB1,CNIH,RASGRP1,STX6,LRRK2,COPB2,MANEA,ITM2B,SCAMP1,SEC22B,PITPNM1,GCC1,CORO7,PNPLA8,TMED10,LMAN2,FKTN,MAN1A2,YIF1A…
GO: Cellular Component	GO:0019866	organelle inner membrane		0.000116	112	374	ABCB7,ACADVL,ALAS2,SLC25A4,ATP5C1,ATP5B,ATP5A1,ATP5D,ATP5F1,ATP5J,UNC84B,ATP5O,SLC25A11,SLC25A20,NIPSNAP1,TOR1AIP1,UNC50,MATR3,C20orf7,SLC25A19,BRP44L,ACSL5,COX7B,COX7A2,COX6C,CRAT,CPT2,COX5B,COX4I1,C3orf1,SLC25A13,LRPPRC,NDUFS7,CYC1,SLC25A22,COX5A,CYB5R3,PMPCB,C3orf31,SLC25A44,RHOT2,GRPEL2,ETFDH,COQ10B,GLUD1,ATP5H,TIMM44,CYB5B,NDUFA13,Magmas,TIMM17B,DUSP18,ATP5L,HADH,HSD17B10,GPD2,APEX2,SLC25A43…
GO: Cellular Component	GO:0000139	Golgi membrane		0.000172	131	457	B3GALT4,MBTPS1,GBF1,AP3D1,AP1G2,AP1S2,AP2A1,B3GAT3,TRIM23,ARF1,PCSK7,B2M,BSG,GORASP2,TPST2,CAV2,CBFA2T3,ENTPD6,B4GALT4,BECN1,STX10,VAMP4,CDC42,UNC50,USO1,SLC35A4,PJA2,DOPEY2,CLN3,GOLGA5,CLTC,ACTR3,BET1L,SCAMP3,SCAMP2,COPB1,CNIH,RASGRP1,STX6,COPB2,MANEA,ITM2B,SEC22B,PITPNM1,GCC1,CORO7,PNPLA8,TMED10,LMAN2,FKTN,MAN1A2,YIF1A,EXT2,B3GNT8,PTGES2,RNF24,FUT8,RER1,SLC35D2,GLG1,NAGPA,SEC23A,SEC23B,COG5,SAR…
GO: Cellular Component	GO:0031965	nuclear membrane		0.000264	66	193	INTS1,ALOX5,ALOX5AP,ATP2A3,UNC84B,BCL2,TAGLN2,MAD1L1,TOR1AIP1,AHCTF1,UNC50,MATR3,SCRN1,MVP,CLIC1,LASS6,SNUPN,NUP37,LRPPRC,TMEM109,CST3,NOC4L,IPO4,DHCR7,WTAP,IPO13,LASS4,SENP2,NUP50,NUPL2,NUP85,GLE1,CEPT1,GCHFR,IPO7,NUP43,KPNA2,KPNA3,KPNB1,NRM,CBX3,MAD2L1,LTC4S,LMNB1,LMNA,INTS2,TNPO1,KPNA4,EIF5A2,NUCB2,MTDH,NUP107,DDX19A,TMCO6,RAN,SEH1L,MKRN1,LEMD3,TMPO,XPO1,NUP54,AAAS,DULLARD,NUP210,ATP11B,NUP160
GO: Cellular Component	GO:0016604	nuclear body		0.000623	67	201	PRPF31,PIAS2,BMI1,PRPF18,RCHY1,CDC5L,SETD1A,TTRAP,DDX46,CREBBP,THOC1,WAC,RSRC1,TOPORS,DDX3X,DGKQ,DAXX,DYRK1A,NCOR2,ELF4,SF3A3,PYHIN1,RNPS1,RNF34,EWSR1,FRG1,TOPBP1,NUDT21,BASP1,SRRM1,SMNDC1,RBM25,PRPF8,PRPF19,ISG20,EIF3E,LRCH4,MAX,C1orf124,YTHDC1,MYC,PNN,PPP1R8,RFWD2,NOC3L,PLRG1,RING1,EAF2,RB1,PTK2,SNRPC,SON,SFRS1,SFRS2,U2AF1L4,TDG,TFIP11,EAF1,SRP54,XPO1,SIRT1,SF3B1,MORC3,SETD1B,FYTTD1,CXXC1,ZMYM2
GO: Cellular Component	GO:0005635	nuclear envelope		0.000759	82	262	PARP1,INTS1,ALOX5,ALOX5AP,ANXA11,ANXA7,MTMR6,ATP2A3,UNC84B,BCL2,TAGLN2,BNIP3L,BNIP2,MAD1L1,TOR1AIP1,AHCTF1,UNC50,MATR3,SCRN1,MVP,CLIC1,LASS6,SNUPN,NUP37,LRPPRC,TMEM109,CST3,NOC4L,IPO4,DHCR7,WTAP,IPO13,LASS4,SENP2,NUP50,NUPL2,NUP85,GLE1,CEPT1,GCHFR,IPO7,NUP43,IGF2R,KPNA2,KPNA3,KPNB1,NRM,CBX3,MAD2L1,NDEL1,LTC4S,LMNB1,LMNA,INTS2,CACYBP,TNPO1,KPNA4,EIF5A2,NUCB2,SLC22A18,MTDH,NUP107,RTN4,DDX19A,TMCO6,…
GO: Cellular Component	GO:0005761	mitochondrial ribosome		0.000792	27	57	MRPL52,MRPS35,MRPL30,MRP63,MRPL3,MRPL55,MRPL2,MRPS18C,MRPS16,MRPL28,MRPL47,MRPL38,MRPL34,MRPL32,MRPS25,MRPL15,MRPL18,MRPL13,MRPL42,MRPS18B,MRPS14,MRPS21,MRPS12,MRPL12,MRPL23,MRPS36,DAP3
GO: Cellular Component	GO:0000313	organellar ribosome		0.000792	27	57	MRPL52,MRPS35,MRPL30,MRP63,MRPL3,MRPL55,MRPL2,MRPS18C,MRPS16,MRPL28,MRPL47,MRPL38,MRPL34,MRPL32,MRPS25,MRPL15,MRPL18,MRPL13,MRPL42,MRPS18B,MRPS14,MRPS21,MRPS12,MRPL12,MRPL23,MRPS36,DAP3
GO: Cellular Component	GO:0019898	extrinsic to membrane		0.00082	142	517	SNAP23,PLDN,RAB11A,AP1G2,MTMR3,GAPVD1,SYNJ2,ALOX5,ARSA,ARRB1,FIBP,ATP6V1B2,NELF,IBTK,KRIT1,APPL1,CAV2,GGA1,NUMB,BECN1,CHMP2B,PNKD,USO1,ZFYVE16,C20orf7,CHMP5,PJA2,VPS29,SH2D3C,TOM1,DNM1L,UNC13D,CTNNA1,CTNNB1,RASGRP1,RASGRP2,FLOT1,ASPSCR1,GNG8,LRRK2,VPS37B,MAGED1,ROCK2,VPS26A,DOCK2,PITPNM1,MARK2,C3orf31,GCC1,CLINT1,PEF1,EHD1,MED28,RALBP1,GNB4,FKBP2,PLEKHA2,PLEKHA1,HPSE,RNF34,GIPC1,FLOT2,FAM125B,BAI…
HUMAN PHENOTYPES AND DISEASES
Human Phenotype	HP:0001871	Hematological abnormality		0	126	469	SUCLA2,ABCB7,AGA,ALAS2,PHGDH,PTPN22,ALDOA,ALPL,PSTPIP1,CHIC2,AIRE,ATM,B2M,PICALM,GTF2H5,NIPBL,BCL2,BCL3,IKBKG,CD40LG,CD36,CD247,CD3E,RFXANK,LYST,CEBPE,CLCN7,CLN3,NT5C3,CREBBP,COL7A1,VPS13B,CSF2RA,NPHP4,DGUOK,CYB5R3,EP300,ENG,PUS1,FH,FES,ERCC3,F13A1,G6PD,PANK2,FLNA,GLA,SEC23B,SAR1B,GP9,SBDS,ABHD5,TCIRG1,MSH6,HBA2,HBB,NPC2,GSS,GSR,SLC35A1,HPRT1,CFH,IL2RG,IFNGR1,IFNGR2,SP110,KCNQ1,JAK2,ITGB2,IL12RB1…
Human Phenotype	HP:0001939	Metabolism abnormality		4.3e-05	262	1383	SUCLA2,TRIM24,NAT1,TRPM6,ABCB7,ABR,ACADM,ACADS,ACADVL,ACOX1,SNX3,ADSL,AGA,AHCY,AGL,AKT1,ALAS2,ABCD1,PHGDH,PTPN22,ALDOA,ALPL,AIP,PSTPIP1,SLC25A4,AIRE,ARAF,ARG1,APRT,ARSA,ATM,B2M,GTF2H5,AXIN1,ATP7A,MKKS,BBS1,NIPBL,BCKDHA,BCL2,C5,AGPS,SLC25A20,CAT,CD40LG,CD36,CD247,CD3E,RFXANK,LYST,C20orf7,ZEB2,CEBPE,CETP,CLCN7,CLN5,CLN3,GOLGA5,NT5C3,CPT2,COL7A1,VPS13B,SLC25A13,CTNNB1,LRPPRC,CTSD,CST3,DCTN1,NPHP4,ND…
Human Phenotype	HP:0002605	Hepatic necrosis		0.000198	10	11	SUCLA2,ACADVL,DGUOK,ETFDH,ETFB,ETFA,HADH,MPV17,C10orf2,GFM1
Human Phenotype	HP:0001250	Seizures		0.000485	104	436	SUCLA2,TRPM6,ACADM,ACADS,ACOX1,ADSL,AGA,PHGDH,PTPN22,ALPL,ARG1,ARSA,ATM,ATP2A2,ATP7A,NIPBL,BCKDHA,IKBKG,SLC25A20,KRIT1,CUL4B,LYST,C20orf7,ZEB2,MED12,CLCN7,CLN5,CLN3,CREBBP,CPT2,PQBP1,VPS13B,CTSD,CD96,NDUFS7,SLC25A22,DLD,DGUOK,DHCR7,PREPL,EP300,ENG,FKTN,FH,FLNA,GLUD1,GLO1,GLA,SLC9A6,GNS,GAMT,TCIRG1,HADH,HSD17B10,NPC2,POMT1,GSS,HSD17B4,CFH,IDS,KCNQ3,UQCRQ,MPV17,CCM2,NDUFA11,MTHFR,MFSD8,C10orf2,ME2,…
Human Phenotype	HP:0001392	Abnormality of the liver		0.000766	78	301	SUCLA2,ACADM,ACADVL,ACOX1,AGA,AGL,ALDOA,AIRE,ARSA,AXIN1,MKKS,BBS1,SLC25A20,KRIT1,CD40LG,RFXANK,LYST,C20orf7,CLCN7,CPT2,SLC25A13,CTNNB1,LRPPRC,CD96,CYBB,DGUOK,ENG,ETFDH,ETFB,ETFA,G6PD,GAA,GNS,SBDS,ABHD5,TCIRG1,GALK1,MRPS16,GBE1,HBB,HADH,NPC2,AGPAT2,HSD17B4,IL2RG,IDS,SP110,JAK2,LMNA,LIPA,UQCRQ,MPV17,NDUFA11,C10orf2,MAN2B1,PCK2,NAGLU,NCF2,NDUFV1,NEU1,PRKCSH,PEX14,SLC39A4,PIK3CA,PKD2,PKD1,PSAP,ABCD3,…
Human Phenotype	HP:0001397	Hepatic steatosis		0.001758	18	35	SUCLA2,ACADM,ACADVL,ACOX1,CPT2,DGUOK,ETFDH,ETFB,ETFA,ABHD5,HADH,AGPAT2,HSD17B4,LMNA,UQCRQ,MPV17,C10orf2,PCK2
Human Phenotype	HP:0003271	Visceromegaly		0.005827	52	183	SUCLA2,ACADM,ACADVL,ACOX1,AGA,AGL,ALDOA,SLC25A20,CD40LG,LYST,CLCN7,CPT2,CD96,CYBB,DGUOK,ETFDH,ETFB,ETFA,G6PD,GAA,GNS,SBDS,ABHD5,TCIRG1,GBE1,HBB,NPC2,AGPAT2,HSD17B4,IL2RG,IDS,JAK2,LMNA,LIPA,MPV17,C10orf2,MAN2B1,NAGLU,NCF2,NEU1,MAP2K2,PEX14,SLC39A4,PSAP,ABCD3,PXMP3,PEX5,PYGL,SGSH,AMACR,TPI1,AKR1D1
Human Phenotype	HP:0003011	Abnormality of musculature		0.006213	132	617	SUCLA2,TRPM6,ACADM,ACADS,ACADVL,ACOX1,ACVR1,ADSL,AGA,AGL,ALPL,BIN1,AIP,SLC25A4,ARSA,MKKS,BCKDHA,YARS,SLC25A20,KRIT1,CUL4B,LYST,C20orf7,ZEB2,MED12,CLCN7,CREBBP,CPT2,VPS13B,LRPPRC,CD96,DCTN1,NDUFS7,SLC25A22,DNM2,DLD,DGUOK,DHCR7,DECR1,LITAF,PREPL,EP300,FKTN,PUS1,FH,ETFDH,ETFB,ETFA,PANK2,GAA,FLNA,GLE1,SLC9A6,ABHD5,GAMT,TCIRG1,MRPS16,GBE1,HADH,HSD17B10,NPC2,POMT1,AGPAT2,HSD17B4,HPRT1,IDS,HSPD1,ALS2,LM…
Human Phenotype	HP:0002012	Abnormality of gastrointestinal organs		0.007084	145	695	SUCLA2,ACADM,ACADS,ACADVL,ACOX1,ACTB,AGA,AGL,KIAA1279,PTPN22,ALDOA,ALPL,BIN1,SLC25A4,AIRE,ARG1,ARSA,GTF2H5,AXIN1,ATP7A,MKKS,BBS1,NIPBL,BCKDHA,C5,SLC25A20,KRIT1,CD40LG,CD247,RFXANK,PNKD,LYST,C20orf7,ZEB2,MED12,CLCN7,CREBBP,CPT2,COL7A1,PQBP1,VPS13B,SLC25A13,CTNNB1,LRPPRC,CD96,CYBB,DLD,DGUOK,DHCR7,PREPL,EP300,ENG,FKTN,ERCC3,ETFDH,ETFB,ETFA,G6PD,PANK2,GAA,FLNA,GLA,SLC9A6,SAR1B,GNS,SBDS,ABHD5,TCIRG1,G…
Human Phenotype	HP:0002240	Hepatomegaly		0.008012	46	156	SUCLA2,ACADM,ACADVL,ACOX1,AGA,AGL,SLC25A20,CD40LG,LYST,CLCN7,CPT2,CD96,CYBB,DGUOK,ETFDH,ETFB,ETFA,GAA,GNS,SBDS,ABHD5,TCIRG1,GBE1,NPC2,AGPAT2,HSD17B4,IL2RG,IDS,LMNA,LIPA,MPV17,C10orf2,MAN2B1,NAGLU,NCF2,NEU1,PEX14,SLC39A4,PSAP,ABCD3,PXMP3,PEX5,PYGL,SGSH,AMACR,AKR1D1
Human Phenotype	HP:0002060	Abnormality of the cerebrum		0.011766	88	374	SUCLA2,ACADM,ACADS,AGA,KIAA1279,PHGDH,ARSA,GTF2H5,ATP7A,NIPBL,BCKDHA,IKBKG,KRIT1,CHMP2B,C20orf7,ZEB2,MED12,CLN3,CREBBP,CPT2,PQBP1,VPS13B,CTSD,CD96,SLC25A22,DLD,DGUOK,DHCR7,CYB5R3,EP300,ENG,FKTN,PUS1,FH,ERCC3,ETFDH,ETFB,ETFA,FTL,PANK2,SLC9A6,MRPS16,POMT1,GRN,HSD17B4,IGBP1,SP110,ALS2,SMAD4,LMNB1,MPV17,NDUFA11,MTHFR,MFSD8,MTR,C10orf2,NBN,NDUFV1,SLC35C1,POR,PRNP,MAP2K2,PPT1,PPP2R2B,PEX14,SIL1,PTEN,PR…
Human Phenotype	HP:0001438	Abdomen abnormality		0.032109	156	778	SUCLA2,ACADM,ACADS,ACADVL,ACOX1,ACTB,AGA,AGL,KIAA1279,PTPN22,ALDOA,ALPL,BIN1,PSTPIP1,SLC25A4,AIRE,ARG1,ARSA,GTF2H5,AXIN1,ATP7A,MKKS,BBS1,NIPBL,BCKDHA,C5,SLC25A20,KRIT1,CD40LG,CD247,RFXANK,PNKD,LYST,C20orf7,ZEB2,MED12,CLCN7,CREBBP,CPT2,COL7A1,PQBP1,VPS13B,SLC25A13,CTNNB1,LRPPRC,CD96,CYBB,DLD,DGUOK,DHCR7,PREPL,EP300,ENG,FKTN,ERCC3,ETFDH,ETFB,ETFA,G6PD,PANK2,GAA,FLNA,GLA,SLC9A6,SAR1B,GP9,GNS,SBDS,AB…
Human Phenotype	HP:0001005	Dermatological manifestations of systemic disorders		0.034552	33	103	SUCLA2,ALDOA,C5,LYST,CYBB,DGUOK,CYB5R3,ENG,ETFDH,ETFB,ETFA,G6PD,GALK1,HBB,NPC2,AGPAT2,JAK2,LMNA,MPV17,C10orf2,NCF2,PROS1,PEX14,PTEN,ABCD3,PXMP3,PEX5,SDHD,SDHC,AMACR,TPI1,AKR1D1,CDAN1
MOLECULAR AND CELLULAR PATHWAYS
Pathway	74160	Gene Expression	Reactome	0	125	269	RNGTT,RNMT,EIF3J,EIF3H,EIF3A,EIF3B,RPL36,CCNT1,CCNH,COBRA1,DHX38,SF3B14,CSTF2,CDC40,SFRS11,RPL23,DDX23,EEF1A1,EIF4A2,EIF4B,EEF2,EEF1D,EEF1B2,FAU,SF3A3,HNRNPA0,RNPS1,PAPOLA,ERCC3,ETF1,RPL35,NUDT21,SF3B4,GTF2B,GTF2A2,GTF2H4,GTF2H1,GTF2F1,GTF2F2,GTF2E2,HNRNPL,HNRNPH2,HNRNPF,HNRNPD,HNRNPC,LSM2,EIF3E,PABPC1,RPSA,PCBP1,PCBP2,NCBP1,RPL10A,NFX1,POLR2L,POLR2C,POLR2F,POLR2A,POLR2B,RPL6,RPL9,RPL8,RPL11,RPL1…
Pathway	72766	Translation	Reactome	0	65	118	EIF3J,EIF3H,EIF3A,EIF3B,RPL36,RPL23,EEF1A1,EIF4A2,EIF4B,EEF2,EEF1D,EEF1B2,FAU,ETF1,RPL35,EIF3E,PABPC1,RPSA,RPL10A,RPL6,RPL9,RPL8,RPL11,RPL12,RPL17,RPL15,RPL18,RPL19,RPL18A,RPL3,RPL5,RPS6,RPS5,RPS9,RPS12,RPS10,RPS11,RPLP1,RPLP2,RPS2,RPS3A,RPS3,RPL32,RPL34,RPL38,RPL39,RPL41,RPL21,RPL22,RPL24,RPL27,RPL27A,RPS24,RPS25,RPS20,RPS27,RPS27A,RPS28,RPS29,RPS14,RPS15A,RPS19,RPS16,RPS17,UBA52
Pathway	RIBOSOMAL_PROTEINS	RIBOSOMAL_PROTEINS	MSigDB	0	59	106	B3GALT4,RPL36,PIGK,RPL23,TBC1D10C,FAU,TSPAN9,RPL35,RPSA,RPL6,RPL9,RPL8,RPL11,RPL12,RPL17,RPL15,RPL18,RPL19,RPL18A,RPL3,RPL5,RPS6,RPS5,RPS6KB1,RPS6KB2,RPS9,RPS12,RPS10,RPS11,RPLP1,RPLP2,RPS2,RPS3A,RPS3,RPL32,RPL34,RPL38,RPL39,RPL41,RPL21,RPL22,RPL24,RPL27,RPL27A,RPS24,RPS25,RPS20,RPS27,RPS27A,RPS28,RPS29,RPS14,RPS19,RPS16,RPS17,LOC388720,UBB,UBC,UBA52
Pathway	bcr_5pathway	BCR signaling pathway	NCI-Nature Curated	0	41	66	BCL10,AKT1,CALM2,IKBKG,CALM1,IBTK,CALM3,CD22,CD19,CD79B,CD79A,CHUK,MAPK14,CSK,ELK1,MALT1,ETS1,MAP4K1,GRB2,LYN,DAPP1,MAP3K1,NFKBIB,NFKBIA,NFKB1,POU2F2,MAPK3,MAPK1,PPP3CA,PDPK1,PLCG2,PIK3CA,PIK3R1,PAG1,RELA,RASA1,PTEN,PTPN6,SHC1,MAP3K7,CARD11
Pathway	hsa03010	Ribosome	KEGG pathway	0	53	102	RPL10L,RPL23,FAU,RPL35,RPSA,RPL10A,RPL6,RPL9,RPL8,RPL11,RPL12,RPL17,RPL15,RPL18,RPL19,RPL18A,MRPL13,RPL3,RPL5,RPS6,RPS5,RPS9,RPS12,RPS10,RPS11,RPLP1,RPLP2,RPS2,RPS3A,RPS3,RPL32,RPL34,RPL36AL,RPL38,RPL39,RPL41,RPL21,RPL24,RPL27,RPL27A,RPS24,RPS25,RPS20,RPS27,RPS27A,RPS28,RPS29,RPS15A,RPS19,RPS16,LOC388720,UBA52,LOC440733
Pathway	HIVNEFPATHWAY	HIVNEFPATHWAY	MSigDB	2.5e-05	33	59	ACTG1,TRADD,PARP1,CFLAR,APAF1,MAP3K14,BIRC2,ARHGDIB,BCL2,CASP2,CD247,CDC2L1,CHUK,DAXX,DFFB,DFFA,BAG4,LMNB1,LMNA,MAP3K1,MAP3K5,NUMA1,NFKBIA,NFKB1,MAP2K7,RELA,RB1,RASA1,PTK2,TNFRSF1B,TNFRSF1A,SPTAN1,TRAF2
Pathway	74159	Transcription	Reactome	3.2e-05	58	133	RNGTT,RNMT,TAF1B,TAF1C,CCNT1,CCNH,COBRA1,DHX38,CSTF2,CDC40,SFRS11,GTF3C5,GTF3C3,RNPS1,PAPOLA,ERCC3,POLR3A,NUDT21,POLR1D,SNAPC5,GTF2B,GTF2A2,GTF3C1,BRF1,GTF3A,GTF2H4,GTF2H1,GTF2F1,GTF2F2,GTF2E2,NCBP1,NFX1,POU2F1,POLRMT,POLR2L,POLR2C,POLR2F,POLR2A,POLR2B,MAPK3,POLR3B,SNRPB,SNAPC3,SFRS1,SFRS2,SFRS5,SFRS6,TCEB1,SUPT5H,TAF7,TAF6,TAF12,TAF10,NCBP2,UBTF,RDBP,SLBP,ZNF143
Pathway	foxopathway	FoxO family signaling	NCI-Nature Curated	0.000172	28	49	AKT1,BCL6,CAT,CHUK,CDKN1B,CREBBP,CTNNB1,CSNK1G3,CSNK1D,CSNK1A1,CSNK1G2,CSNK1E,EP300,YWHAQ,FOXO3,RAN,RALB,RALA,RBL2,YWHAH,YWHAG,YWHAZ,YWHAB,YWHAE,XPO1,CSNK1G1,SIRT1,ZFAND5
Pathway	ifngpathway	IFN-gamma pathway	NCI-Nature Curated	0.000195	26	44	AKT1,CALM2,CALM1,CALM3,CASP1,SOCS1,CEBPB,PIAS4,CRKL,CREBBP,EP300,PTGES2,IFNGR1,IFNGR2,JAK2,MAP3K1,MAP3K11,MAPK3,MAPK1,PIK3CA,PIK3R1,RAP1B,RAP1A,PTPN11,STAT3,STAT1
Pathway	MRNA_PROCESSING_REACTOME	MRNA_PROCESSING_REACTOME	MSigDB	0.000215	53	123	RNGTT,RNMT,PRPF4B,SNURF,SPOP,PRPF18,DHX38,CLK3,CSTF3,CSTF2,SFRS14,CDC40,DDX1,DHX15,TMED10,SF3A3,RNPS1,PAPOLA,CPSF4,GIPC1,NUDT21,SF3B4,SRRM1,PRPF8,PRMT1,HNRNPL,HNRNPH2,HNRNPD,HNRNPC,PTBP2,LSM2,SF4,CLK4,NCBP1,PPM1G,POLR2A,PTBP1,SNRPN,SNRPD2,SNRPB,SNRPA,SFRS2,SFRS5,SFRS6,SUPT5H,SRPK2,SRPK1,DNAJC8,NCBP2,SF3A2,DICER1,SF3B1,CSTF2T
Pathway	h_HivnefPathway	HIV-I Nef: negative effector of Fas and TNF	CGAP BioCarta	0.000422	30	56	ACTG1,TRADD,PARP1,CFLAR,APAF1,MAP3K14,ARHGDIB,BCL2,CAD,CASP2,CHUK,DAXX,CYC1,DFFB,DFFA,BAG4,LMNB1,LMNA,MAP3K1,MAP3K5,NUMA1,NFKBIA,NFKB1,MAP2K7,RB1,RASA1,PTK2,TNFRSF1A,SPTAN1,TRAF2
Pathway	tnfpathway	TNF receptor signaling pathway	NCI-Nature Curated	0.000665	26	46	TRADD,BIRC2,NSMAF,IKBKG,MADD,CHUK,MAP4K4,BAG4,MAP3K7IP1,GNB2L1,MAP3K1,MAP3K5,NFKB1,RFFL,MAP2K3,MAP2K7,RELA,MAP4K2,SMPD2,TNFRSF1B,TNFRSF1A,MAP3K7,STAT1,TXN,TRAF2,TNIK
Pathway	tcr_pathway	TCR signaling in naïve CD4+ T cells	NCI-Nature Curated	0.00084	32	63	BCL10,AKT1,MAP3K14,IKBKG,CD4,CD247,CD3E,CDC42,CHUK,MAP3K8,RASGRP1,RASGRP2,CSK,MALT1,MAP4K1,FYB,FLNA,GRB2,NCK1,PDPK1,PAG1,RAP1A,DBNL,PTEN,PTPN11,PTPN6,SHC1,STIM1,ZAP70,WAS,ORAI1,CARD11

## Sheet: PC1 MN TOP1000
TOPPFUN OUTPUT FOR TOP 1000 SIGNIFICANT TRANSCRIPTS FOR BP1 COMPARISON (PC1 in MN study)
				P-value	Hits in List	Count in DB	Targets
TRANSCRIPTION FACTOR BINDING SITES
TFBS	SCGGAAGY_V$ELK1_02	SCGGAAGY_V$ELK1_02		0	113	871	BANF1,SIGIRR,METAP2,SLC25A1,SNRPB,RNPS1,SON,TRADD,GRPEL2,AGL,SYNJ1,FBXL6,B3GAT3,ALDOA,SIPA1,PAPD4,AIP,VPS52,NFS1,MTPN,MRPL3,SDF2,DIABLO,CDC37,TBC1D13,RHOA,RPS3A,RPL36AL,TTC14,MGAT2,CYB561D2,RSU1,KCTD13,MAP3K11,EXOSC5,BAD,XAB2,ZNF580,MOSPD3,KLHDC3,VPS16,GNAI3,SF3B4,STAG1,PCBP2,STXBP2,STIM1,STAG2,YME1L1,SLC38A10,GTF3C1,SUPT5H,CGGBP1,NARS,NIF3L1,SERTAD1,TBCE,TAF10,USP16,NFKBIB,STX10,PTPN23,SRP54,SRP…
TFBS	RCGCANGCGY_V$NRF1_Q6	RCGCANGCGY_V$NRF1_Q6		1e-06	82	654	EHD1,RALBP1,SON,ADAM10,SMARCB1,RAB10,AP1G2,AP2A1,SFRS1,MXD3,PAPD4,RNF24,MTPN,MAP4K1,RHOA,CYB561D2,RSU1,KCTD13,MAP3K11,EXOSC5,BAD,ATP5D,TIAL1,PGLS,ZFP91,APBB3,SRRM1,STAG1,STAG2,GTF3C1,UPF2,CDK10,GTF2F1,RANBP3,CASP2,PPM1D,EIF3A,POMT1,GSS,SRPK1,USO1,SLC35A4,LSM1,ABCF3,RNF40,PIAS4,ZNF2,MAP2K2,MAPK7,ACIN1,PPP2CA,UQCRC1,PAIP2,HNRPDL,ARPC5,WAC,UBE2D3,CNIH,IDH3G,TRIM28,RBM12,ZDHHC12,ACTR1A,HSPD1,MBD3,PHK…
TFBS	V$ELK1_02	V$ELK1_02		0.000936	30	185	FERMT3,SNRPB,SON,PAPD4,VPS52,MTPN,MRPL3,SDHD,DIABLO,KLHDC3,DNAJA2,GTF3C1,SUPT5H,CGGBP1,DHX30,ZNF22,MED15,PRCP,LEPRE1,NR1H2,IL2RG,ACTR2,UBE2N,RBM22,LYPLA2,ZNF408,TRAF7,PSMD12,BAT3,MAPK8IP3
TFBS	GTGACGY_V$E4F1_Q6	GTGACGY_V$E4F1_Q6		0.004251	57	497	AAMP,ADAM10,SMARCD1,SFRS1,SKP1,SYNJ1,MBNL1,SSBP3,ANXA7,DIABLO,ARL2,ZNF524,USP8,CDC26,ATP6V0C,ATP6V1A,BAP1,SEC24B,GNB2,OGDH,OSBP,TERF2,STAG1,CALM2,VAMP2,YME1L1,GTF3C1,GTF2F1,PCNP,TAF10,NFKB2,STAMBP,PTPN23,SRPR,RNF40,PIAS4,G3BP2,CTDSP1,ZFR,PPP6C,PPP2R1A,NR1H2,PTOV1,DMTF1,RCE1,UBE2D3,IDH3G,CRY2,RELA,DDX3X,MLF2,JUNB,MLLT10,NDEL1,POLDIP3,PITPNM1,RAB5C
TFBS	V$CETS1P54_01	V$CETS1P54_01		0.005297	30	201	SNRPB,TRPC4AP,B3GAT3,SIPA1,VPS52,MTPN,MRPL3,XAB2,GNAI3,DNAJA2,CAST,STK10,GTF3C1,CGGBP1,RGS14,CD3E,SPI1,LSM1,ZNF22,HNRNPD,NR1H2,DMTF1,GMPR2,ACTR2,LYPLA2,ZNF408,PSMD12,BAT3,WDR8,DR1
TFBS	V$SP1_Q6	V$SP1_Q6		0.019708	28	194	SMARCD1,TRPC4AP,SIPA1,RNF24,CDC37,FKBP8,ARHGEF1,MAP3K11,ZNF524,BAD,ZFP91,ZNF282,VAMP2,PRKRA,UPF2,CGGBP1,HYAL2,CLSTN1,GLTP,SH2D3C,PEX14,UGP2,PTOV1,DMTF1,ROD1,TRIM28,CDC40,RELA
TFBS	V$NFMUE1_Q6	V$NFMUE1_Q6		0.019708	28	194	FASTK,AP3D1,ATF4,UBE2J2,ATP6V0C,ZFP91,APBB3,SRRM1,STAG1,VAMP2,STRN4,EIF3A,CD4,CD3E,CNOT3,PPP1CC,SLC35A4,CLSTN1,KIAA0528,PRKCSH,HNRNPD,UBE2D3,RBM12,DHX15,E4F1,RAB1A,EIF4G2,RAB22A
TFBS	V$TEL2_Q6	V$TEL2_Q6		0.020457	26	174	SNRPB,RNPS1,AGL,SIPA1,DIABLO,MAP3K11,RIN3,TCF12,FURIN,SF3B4,CAST,CGGBP1,RGS14,HYAL2,CD3E,CD79A,DMTF1,GMPR2,UBE2N,ARHGAP15,JUNB,MGAT4A,LYPLA2,ZNF408,FCHO1,TRIM41
TFBS	RYTTCCTG_V$ETS2_B	RYTTCCTG_V$ETS2_B		0.025175	84	869	FERMT3,SIGIRR,ABCA2,ADAM15,ACTN1,ADAM10,RAB10,SH3BGRL,AP1G2,TRPC4AP,SLC4A2,SIPA1,PDCD10,MBNL1,SH3BP1,CHIC2,MAP4K1,CDC37,FLT3LG,ABCC10,CYB561D2,MAP3K11,RIN3,ATP2A3,TIAL1,TIMM44,TLN1,ZFP91,BCL3,TCF12,ZNF282,FURIN,FMNL1,DNAJA2,CAST,LMO4,CALM2,STK10,STIM1,CALR,RGS14,NDUFA4,NEDD9,SP2,SPTAN1,CD4,HYAL2,CD3E,SPI1,SRPR,CD79A,SS18,SLC35C1,RNF40,YWHAH,CITED4,DMTF1,GMPR2,ACTR2,SSBP4,UBTF,PLCB2,PIK3R1,KPNB1,V…
MICRO RNA BINDING SITES
MicroRNA	miR-206:PicTar	miR-206:PicTar	PicTar	0.003077	50	404	ABCB7,SLC25A1,YWHAQ,SMARCB1,AP3D1,SFRS1,DCP2,PDCD10,MTPN,MNT,KCTD13,ATP6V0C,ZNF580,NSF,NCOA3,ZFP91,ZFP36L1,OSBP,TCF12,TEF,CALM2,CORO1B,STAG2,VAMP2,SH3BGRL3,GRK6,SP2,CDC42,SS18,MATR3,AZIN1,RNF40,MEX3C,TMUB2,HSPD1,PHKG2,RAP1B,SLC25A22,UBE4A,SLC44A1,GIT1,DHX15,PTBP1,NDEL1,ARHGAP21,POLDIP3,OSBPL7,ZNF800,ZNF146,TRIM26
MicroRNA	miR-1:PicTar	miR-1:PicTar	PicTar	0.004074	50	408	ABCB7,SLC25A1,YWHAQ,SMARCB1,AP3D1,SFRS1,DCP2,PDCD10,MTPN,MNT,KCTD13,ATP6V0C,ZNF580,NSF,NCOA3,ZFP91,ZFP36L1,OSBP,TEF,CALM2,CORO1B,STAG2,VAMP2,SH3BGRL3,GRK6,SP2,CDC42,SS18,MATR3,AZIN1,RNF40,MEX3C,HSPD1,PHKG2,RAP1B,SLC25A22,UBE4A,SLC44A1,MGAT4A,GIT1,DHX15,PTBP1,NDEL1,ARHGAP21,DYRK1A,POLDIP3,OSBPL7,ZNF800,ZNF146,TRIM26
DRUGS
Drug	D014810	Vitamin E	CTD	1e-06	143	1453	FARSA,AAMP,BANF1,METAP2,SLC25A1,MPST,OS9,DGCR8,C11orf68,SNRPB,RALBP1,RNPS1,ACTN4,PRR13,SON,ADD3,AP2A2,CDC16,ALDOA,GIPC1,MBNL1,FAM89B,BAZ1A,DIABLO,MAP3K1,BIRC2,ARAF,ARF5,CCL5,MDH2,ARHGDIA,PCSK7,MNT,ADRM1,OGFR,NUMA1,ZNF580,TIAL1,C19orf24,TLN1,BAP1,ZNF324,NIPBL,USP9X,PEMT,BRMS1,C1orf63,LTBP4,PA2G4,GDI1,PCM1,STUB1,CALR,STAG2,CERK,SUPT5H,CDK10,GTF2F1,RAB33B,GMPPA,CUL4A,RANBP3,TARBP2,SPTAN1,NFKBIB,CCND…
Drug	D008727	Methotrexate	CTD	1.8e-05	41	255	C19orf6,PAPOLA,DCP2,ALOX5,PLD3,RPS6KB1,ARHGDIA,ATP5D,ZNF580,SDF4,TLN1,DGCR6,TCF12,CDK2AP2,CALR,SH3BGRL3,CD4,NFKB2,GRN,CNOT3,CLSTN1,MED15,MAP2K2,CLN3,CLPTM1,MED16,PTOV1,ARL6IP4,TRIM28,ACTR1A,MBD3,RELA,PDLIM7,DAPK3,SF3B1,DHX15,FNBP1,BAT3,PSAP,RAB1A,GPR172A
GENE ONTOLOGY CATEGORIES
GO: Molecular Function	GO:0003723	RNA binding		3e-06	79	766	FARSA,XRN1,DGCR8,SNRPB,SNRPA,RNPS1,SON,PAPOLA,PRPF31,SFRS1,SYNJ1,DCP2,MBNL1,MRPL3,RPUSD1,RPS3A,TTC14,EXOSC5,TIAL1,PUSL1,ZFP36L1,PA2G4,SF3B4,SRRM1,SMNDC1,PCBP2,RBM25,CALR,PRKRA,RBM15,UPF2,DNAJC17,TARBP2,EIF3B,SPI1,TROVE2,SRP9,SRP54,DDX17,SRPR,STAU1,LSM1,MATR3,SETD1A,DHX30,CNBP,RBM42,LARP7,G3BP2,HMGB1,PRKCSH,HNRNPD,RALY,DDX46,SF3B14,ZFR,PAIP2,ROD1,HNRPDL,MEX3C,CSTF2,RPUSD4,NIP7,RBM12,RBM22,DDX41,UP…
GO: Molecular Function	GO:0019899	enzyme binding		0.000107	67	664	ACD,PRDX3,RALBP1,ADAM10,TRADD,ADD3,NOXA1,MAP3K1,FGD3,MAP3K11,RIN3,BAD,NIPBL,TOP2B,SLC22A18,FURIN,PA2G4,FMNL1,STUB1,CBX4,ANAPC2,SUPT5H,CUL4A,RANBP3,STRN4,CASP2,TAF10,SP2,CD4,CD3E,RBCK1,CCND3,CDC42,STAU1,PPP1CC,VPS4A,DOCK11,RNF40,YWHAH,YWHAB,YWHAE,PRKCSH,SGSM3,HK3,ACIN1,PFKL,HSPD1,PIK3R1,PKD2,SYTL1,INF2,TRAF2,PHKG2,KIF13B,RELA,COPB2,ITGB1,LONP1,DNM2,GIT1,CABIN1,MARCKS,ATP6V1G1,MAPK8IP3,RAD9A,RNF20,…
GO: Biological Process	GO:0015031	protein transport		0	101	932	RAB32,YWHAQ,SNAP23,ACD,ACTN4,RAB10,AP3D1,GRPEL2,AP1G2,AP2A2,AP2A1,GAPVD1,TRPC4AP,GIPC1,AIP,VPS52,ARF5,CDC37,RHOA,FAM125B,NAGPA,TIMM44,NSF,SAR1B,SEC24B,VPS16,BCL3,TOM1L2,VPS36,TIMM16,PTTG1IP,GDI1,TSPO,STXBP2,STX1A,CALR,VAMP7,VAMP2,RAB33B,RANBP3,NFKBIB,STX10,SSR1,APPBP2,SRP9,SRP54,SRPR,USO1,NCKIPSD,POU2F2,CHMP5,VPS4A,YWHAH,YWHAB,YWHAE,G3BP2,VPS37A,MAPK3,MVP,RAB21,PPT1,PEX14,COPB1,TXN,VPS35,ARFGAP1,…
GO: Biological Process	GO:0008104	protein localization		0	114	1110	RAB32,YWHAQ,SNAP23,ACD,OS9,ACTN4,RAB10,GPAA1,AP3D1,GRPEL2,AP1G2,AP2A2,AP2A1,GAPVD1,TRPC4AP,GIPC1,AIP,VPS52,ARF5,CDC37,ARHGDIA,RHOA,FAM125B,NAGPA,TIMM44,TLN1,NSF,SAR1B,SEC24B,VPS16,NIPBL,BCL3,TOM1L2,ULK1,VPS36,TIMM16,PTTG1IP,GDI1,TERF2,TSPO,STXBP2,STX1A,CALR,VAMP7,VAMP2,RAB33B,RANBP3,CD4,NFKBIB,STX10,SSR1,APPBP2,SRP9,SRP54,CDC42,SRPR,USO1,NCKIPSD,POU2F2,CHMP5,VPS4A,YWHAH,YWHAB,YWHAE,G3BP2,VPS37A,M…
GO: Biological Process	GO:0045184	establishment of protein localization		0	102	949	RAB32,YWHAQ,SNAP23,ACD,ACTN4,RAB10,AP3D1,GRPEL2,AP1G2,AP2A2,AP2A1,GAPVD1,TRPC4AP,GIPC1,AIP,VPS52,ARF5,CDC37,RHOA,FAM125B,NAGPA,TIMM44,NSF,SAR1B,SEC24B,VPS16,BCL3,TOM1L2,VPS36,TIMM16,PTTG1IP,GDI1,TSPO,STXBP2,STX1A,CALR,VAMP7,VAMP2,RAB33B,RANBP3,NFKBIB,STX10,SSR1,APPBP2,SRP9,SRP54,SRPR,USO1,NCKIPSD,POU2F2,CHMP5,VPS4A,YWHAH,YWHAB,YWHAE,G3BP2,VPS37A,MAPK3,MVP,RAB21,PPT1,PEX14,COPB1,TXN,VPS35,ARFGAP1,…
GO: Biological Process	GO:0033036	macromolecule localization		0	125	1293	RAB32,YWHAQ,SNAP23,ACD,OS9,EHD1,ACTN4,RAB10,GPAA1,AP3D1,GRPEL2,AP1G2,AP2A2,AP2A1,GAPVD1,TRPC4AP,GIPC1,AIP,VPS52,ARF5,CDC37,ARHGDIA,RHOA,FAM125B,NAGPA,TIMM44,TLN1,NSF,SAR1B,SEC24B,VPS16,NIPBL,BCL3,TOM1L2,OSBP,ULK1,VPS36,TIMM16,PTTG1IP,GDI1,TERF2,TSPO,STXBP2,STX1A,CALR,VAMP7,VAMP2,UPF2,RAB33B,PNPLA2,RANBP3,CD4,NFKBIB,STX10,SSR1,APPBP2,SRP9,SRP54,CDC42,SRPR,STAU1,USO1,NCKIPSD,POU2F2,CHMP5,VPS4A,YWHA…
GO: Biological Process	GO:0046907	intracellular transport		0	99	942	RHOT2,ABCA2,SLC25A1,YWHAQ,SNAP23,ACD,EHD1,ADAM10,RAB10,AP3D1,GRPEL2,AP1G2,AP2A2,AP2A1,TRPC4AP,ABCD1,GIPC1,AIP,CHIC2,CDC37,RHOA,NAGPA,ATP5D,TIMM44,SAR1B,MKKS,SEC24B,VPS16,BCL3,TOM1L2,VPS36,TIMM16,PTTG1IP,NDE1,TSPO,STXBP2,STX1A,CAMK1,CALR,VAMP7,VAMP2,RHOT1,UPF2,RANBP3,MAP1S,NFKBIB,STX10,SSR1,APPBP2,SRP9,SRP54,CDC42,SRPR,USO1,PPP1CC,HSP90AA1,NCKIPSD,CHMP5,VPS4A,KIAA1012,YWHAH,YWHAB,YWHAE,G3BP2,MAPK3…
GO: Biological Process	GO:0006886	intracellular protein transport		2e-06	62	516	YWHAQ,ACD,RAB10,AP3D1,GRPEL2,AP1G2,AP2A2,AP2A1,TRPC4AP,GIPC1,AIP,CDC37,RHOA,NAGPA,TIMM44,SAR1B,SEC24B,VPS16,BCL3,TOM1L2,TIMM16,PTTG1IP,TSPO,STXBP2,STX1A,CALR,NFKBIB,STX10,SSR1,APPBP2,SRP9,SRP54,SRPR,USO1,NCKIPSD,YWHAH,YWHAB,YWHAE,G3BP2,MAPK3,MVP,PEX14,COPB1,TXN,PACS1,TSC2,RBM22,STX6,CRY2,SYTL1,ASPSCR1,KIF13B,KPNA3,KPNB1,COPB2,TAOK2,PEX16,FCHO1,VPS41,NUP210,RAB1A,IPO13
GO: Biological Process	GO:0034613	cellular protein localization		7e-06	65	572	YWHAQ,ACD,RAB10,AP3D1,GRPEL2,AP1G2,AP2A2,AP2A1,TRPC4AP,GIPC1,AIP,CDC37,RHOA,NAGPA,TIMM44,SAR1B,SEC24B,VPS16,NIPBL,BCL3,TOM1L2,TIMM16,PTTG1IP,TERF2,TSPO,STXBP2,STX1A,CALR,NFKBIB,STX10,SSR1,APPBP2,SRP9,SRP54,CDC42,SRPR,USO1,NCKIPSD,YWHAH,YWHAB,YWHAE,G3BP2,MAPK3,MVP,PEX14,COPB1,TXN,PACS1,TSC2,RBM22,STX6,CRY2,SYTL1,ASPSCR1,KIF13B,KPNA3,KPNB1,COPB2,TAOK2,PEX16,FCHO1,VPS41,NUP210,RAB1A,IPO13
GO: Biological Process	GO:0044265	cellular macromolecule catabolic process		8e-06	89	897	XRN1,OS9,FBXW5,RNPS1,RNF34,AGL,SKP1,FBXL6,DCP2,CDC16,ALDOA,GIPC1,PAPD4,VCPIP1,APAF1,MAN2B1,MAP3K1,G6PD,MDH2,USP8,UBE2J2,CDC26,BAD,BAP1,CLPP,PGLS,UBL7,GNS,USP9X,OGDH,ZFP36L1,ZMPSTE24,STUB1,CBX4,ANAPC2,UPF2,PCNP,CUL4A,CDC23,HYAL2,USP16,NFX1,STAMBP,RBCK1,MIB2,PPP1CA,LSM1,FBXL15,RNF40,PIAS4,HMGB1,HNRNPD,HK3,USP15,PPT1,CLN3,RFWD2,USP1,PFKL,PDHB,UBE2N,NPLOC4,UBE2D3,UBE2E1,PKM2,PSMD14,UPF1,SPSB3,RAB40C,…
GO: Biological Process	GO:0051641	cellular localization		1.2e-05	123	1399	RHOT2,ABCA2,SLC25A1,YWHAQ,SNAP23,ACD,OS9,EHD1,ADAM10,RAB10,GPAA1,AP3D1,GRPEL2,AP1G2,AP2A2,AP2A1,TRPC4AP,SYNJ1,ABCD1,GIPC1,AIP,CHIC2,CDC37,CCL5,RHOA,NAGPA,ATP5D,SDF4,TIMM44,TLN1,NSF,SAR1B,MKKS,SEC24B,VPS16,NIPBL,BCL3,TOM1L2,VPS36,LTBP4,TIMM16,FURIN,PTTG1IP,NDE1,TERF2,TSPO,STXBP2,STX1A,CAMK1,CALR,VAMP7,VAMP2,RHOT1,UPF2,RANBP3,MAP1S,ARFGEF1,CD4,CDC23,DGAT1,NFKBIB,STX10,SSR1,APPBP2,SREBF1,SRP9,SRP54,…
GO: Biological Process	GO:0051649	establishment of localization in cell		2.3e-05	116	1309	RHOT2,ABCA2,SLC25A1,YWHAQ,SNAP23,ACD,EHD1,ADAM10,RAB10,AP3D1,GRPEL2,AP1G2,AP2A2,AP2A1,TRPC4AP,SYNJ1,ABCD1,GIPC1,AIP,CHIC2,CDC37,CCL5,RHOA,NAGPA,ATP5D,SDF4,TIMM44,NSF,SAR1B,MKKS,SEC24B,VPS16,BCL3,TOM1L2,VPS36,LTBP4,TIMM16,FURIN,PTTG1IP,NDE1,TSPO,STXBP2,STX1A,CAMK1,CALR,VAMP7,VAMP2,RHOT1,UPF2,RANBP3,MAP1S,ARFGEF1,CDC23,DGAT1,NFKBIB,STX10,SSR1,APPBP2,SREBF1,SRP9,SRP54,CDC42,SRPR,USO1,PPP1CC,HSP90AA1…
GO: Biological Process	GO:0009057	macromolecule catabolic process		2.5e-05	122	1401	METAP2,XRN1,OS9,ADAM15,FBXW5,RNPS1,SOLH,ADAM10,RNF34,AGL,SKP1,FBXL6,DCP2,CDC16,ALDOA,GIPC1,PAPD4,VCPIP1,APAF1,MAN2B1,MAP3K1,G6PD,MDH2,PCSK7,USP8,UBE2J2,CRBN,CDC26,THOP1,BAD,AURKAIP1,NSF,AXIN1,BAP1,CLPP,PGLS,UBL7,GNS,USP9X,OGDH,ZFP36L1,LTBP4,FURIN,DPP7,ZMPSTE24,STUB1,CBX4,CAST,GZMM,ANAPC2,YME1L1,UPF2,PCNP,CUL4A,CASP2,CASP4,CDC23,HYAL2,USP16,NFX1,STAMBP,RBCK1,MIB2,PPP1CA,LSM1,FBXL15,RNF40,PIAS4,HMG…
GO: Biological Process	GO:0008380	RNA splicing		0.000213	40	305	TRPT1,SNRPB,SNRPA,RNPS1,PAPOLA,PRPF31,SFRS1,MBNL1,FRG1,XAB2,SF3B4,SRRM1,SMNDC1,PCBP2,C19orf29,RBM25,GTF2F1,GTF2F2,IVNS1ABP,SYF2,SRPK1,LSM1,HNRNPD,RALY,DDX46,SF3B14,PPP2CA,PPP2R1A,PLRG1,CSTF2,ARL6IP4,CDC40,RBM22,DDX41,SF3A2,ZMAT5,SF3B1,DDX23,DHX15,PTBP1
GO: Biological Process	GO:0043285	biopolymer catabolic process		0.000577	110	1297	METAP2,XRN1,OS9,ADAM15,FBXW5,RNPS1,SOLH,ADAM10,RNF34,AGL,SKP1,FBXL6,DCP2,CDC16,GIPC1,PAPD4,VCPIP1,APAF1,MAP3K1,PCSK7,USP8,UBE2J2,CRBN,CDC26,THOP1,AURKAIP1,NSF,AXIN1,BAP1,CLPP,UBL7,GNS,USP9X,ZFP36L1,LTBP4,FURIN,DPP7,ZMPSTE24,STUB1,CBX4,CAST,GZMM,ANAPC2,YME1L1,UPF2,PCNP,CUL4A,CASP2,CASP4,CDC23,HYAL2,USP16,NFX1,STAMBP,RBCK1,MIB2,PPP1CA,LSM1,FBXL15,RNF40,PIAS4,HMGB1,SGSM3,HNRNPD,USP15,PPT1,PRCP,CLN3,…
GO: Biological Process	GO:0006396	RNA processing		0.000713	61	590	TRPT1,XRN1,DGCR8,SNRPB,SNRPA,RNPS1,PAPOLA,INTS1,PRPF31,SFRS1,PAPD4,MBNL1,FRG1,EXOSC5,XAB2,C1orf66,PUSL1,PA2G4,SF3B4,SRRM1,SMNDC1,PCBP2,C19orf29,RBM25,PRKRA,GTF2F1,GTF2F2,IVNS1ABP,TARBP2,TBL3,SYF2,DDX17,SRPK1,LSM1,LARP7,HNRNPD,RALY,DDX46,SF3B14,PPP2CA,PPP2R1A,ROD1,HNRPDL,PLRG1,CSTF2,ARL6IP4,CDC40,RBM22,DDX41,NOC4L,UPF1,SF3A2,SSU72,ZMAT5,SF3B1,DDX23,EXOSC8,DHX15,PTBP1,URM1,DEDD2
GO: Biological Process	GO:0044248	cellular catabolic process		0.000767	112	1335	ACADM,XRN1,MPST,OS9,FH,PRDX3,FBXW5,RNPS1,RNF34,AGL,SKP1,FBXL6,DCP2,ABCD1,CDC16,FAAH,ALDOA,GIPC1,PAPD4,VCPIP1,APAF1,MAN2B1,SDHD,MAP3K1,G6PD,MDH2,ARSA,USP8,UBE2J2,CDC26,BAD,HSD17B11,ATP5D,BAP1,CLPP,PGLS,UBL7,GNS,USP9X,OGDH,ZFP36L1,DERA,ULK1,FURIN,ZMPSTE24,STUB1,CBX4,ANAPC2,UPF2,PCNP,PNPLA2,CUL4A,CDC23,HYAL2,USP16,NFX1,STAMBP,RBCK1,MIB2,PPP1CA,LSM1,FBXL15,RNF40,YWHAH,PIAS4,HMGB1,HNRNPD,HK3,USP15,PPT…
GO: Cellular Component	GO:0005654	nucleoplasm		1e-06	98	1035	KIAA1267,ACD,SNRPB,MORF4L1,RNPS1,SON,SMARCD1,SMARCC2,SMARCB1,SMARCA2,C19orf2,INTS1,PRPF31,RNF34,SFRS1,SKP1,CDC16,PMF1,FRG1,MEN1,RPS6KB2,WDR5,ATF4,CDC26,XAB2,NUMA1,TOP2B,TCF3,ORC2L,TCF12,STK24,ATXN7L3,SRRM1,TERF2,SMNDC1,LMO4,RBM25,CNOT7,ANAPC2,MED22,GTF3C1,BRF1,SUPT5H,GTF2F1,GTF2F2,IVNS1ABP,TAF12,TAF10,GPS2,CDC23,SPI1,NFKB2,SRP54,COBRA1,PPP1CC,PPP1CA,SETD1A,MLL4,LARP7,YWHAB,MED15,HMGB1,MED24,MAPK7…
GO: Cellular Component	GO:0005768	endosome		4e-06	47	368	EHD1,PRDX3,CYBASC3,SH3GL1,AP1G2,GAPVD1,SLA,VPS52,ARSA,FAM125B,RIN3,B2M,SDF4,VPS16,VPS36,FURIN,VAMP7,ARL8B,CD4,STAMBP,CD79A,MIB2,CHMP5,VPS4A,VPS37A,RAB21,TMEM55A,CLN3,UNC13D,VPS35,SCYL2,VAC14,STX6,HSPD1,PI4KB,VPS39,VPS37B,TM9SF2,VPS18,SCAMP1,WDFY1,VPS26A,VPS25,VPS41,RAB5C,LAMP2,RAB22A
GO: Cellular Component	GO:0005739	mitochondrion		2e-05	123	1475	RHOT2,ABCB7,SLC25A1,RAB32,MTRF1L,ACADM,MPST,FH,PRDX3,FDX1L,GLYCTK,FASTK,GRPEL2,SLC25A46,RDH13,ABCD1,ALDOA,PTGES2,NFS1,MRPL3,SDHD,DIABLO,ME2,HEBP2,ARAF,MDH2,MRPL55,RHOA,FKBP8,BAD,AURKAIP1,ATP5D,ATP6V1A,TIMM44,CLPP,CYB5B,GMFB,OGDH,PEMT,BSG,TIMM16,HDDC2,MRPS31,TSPO,ACN9,UQCC,HIGD1A,YME1L1,RHOT1,CERK,NARS,NIF3L1,NDUFA4,CCDC90B,NDUFB5,TAZ,SFXN5,GFM1,CLIC4,LOC388789,ATP5SL,GRN,MRPL32,PPP1CC,HIGD2A,POLR…
GO: Cellular Component	GO:0030529	ribonucleoprotein complex		2.3e-05	59	544	SNRPB,SNRPA,ACTN4,PRPF31,SFRS1,DCP2,EDC3,MBNL1,FRG1,MRPL3,RPS6KB1,MRPL55,RPS3A,RPL36AL,XAB2,PA2G4,SF3B4,MRPS31,SRRM1,SMNDC1,PCBP2,C19orf29,CALR,GTF3C1,IVNS1ABP,TARBP2,TBL3,TROVE2,SYF2,SRP9,SRP54,SRPR,STAU1,MRPL32,LSM1,LARP7,HNRNPD,RALY,MVP,HNRPDL,WAC,PLRG1,CDC40,RBM22,PRMT3,DDX41,NOC4L,UPF1,SF3A2,MRPL15,ZMAT5,TDRD7,SF3B1,RPL9,DDX23,ILF3,DHX15,PTBP1,PSMA1
GO: Cellular Component	GO:0031988	membrane-bounded vesicle		3e-05	72	726	ABCA2,SNAP23,EHD1,ACTN1,ACTN4,ADAM10,AP1G2,AP2A2,AP2A1,ALDOA,GIPC1,SIPA1,PACSIN2,HIP1R,CHIC2,ARSA,RIN3,ATP1B3,AXIN1,GP9,SEC24B,GNAI3,BSG,ULK1,AGTRAP,FURIN,NCK2,DPP7,STXBP2,STX1A,UQCC,VAMP7,VAMP2,GNA13,POMT1,APPBP2,SREBF1,PTPN23,CLIC4,NOTCH1,HSP90AA1,YWHAB,YWHAE,PKN1,RAB21,PPT1,CLK3,CLN3,COPB1,UNC13D,SCYL2,PACS1,CTSD,STX6,HSPD1,TRPV2,SYTL1,ASPSCR1,COPB2,TAOK2,ITGB1,DNM2,COPE,TRAF7,FNBP1,SCAMP1,ARH…
GO: Cellular Component	GO:0016023	cytoplasmic membrane-bounded vesicle		4.1e-05	70	704	ABCA2,SNAP23,EHD1,ACTN1,ACTN4,ADAM10,AP1G2,AP2A2,AP2A1,ALDOA,GIPC1,SIPA1,PACSIN2,HIP1R,CHIC2,ARSA,RIN3,ATP1B3,AXIN1,GP9,SEC24B,GNAI3,BSG,ULK1,AGTRAP,FURIN,DPP7,STXBP2,STX1A,UQCC,VAMP7,VAMP2,GNA13,POMT1,APPBP2,SREBF1,PTPN23,CLIC4,NOTCH1,HSP90AA1,YWHAB,YWHAE,PKN1,RAB21,PPT1,CLK3,CLN3,COPB1,UNC13D,SCYL2,PACS1,CTSD,STX6,HSPD1,TRPV2,SYTL1,COPB2,TAOK2,ITGB1,DNM2,COPE,TRAF7,FNBP1,SCAMP1,ARHGAP21,ATP6V1G…
GO: Cellular Component	GO:0031982	vesicle		6.4e-05	76	797	ABCA2,SNAP23,EHD1,ACTN1,ACTN4,ADAM10,AP1G2,AP2A2,AP2A1,ALDOA,GIPC1,SIPA1,PACSIN2,ANXA7,HIP1R,CHIC2,ARSA,RIN3,ATP1B3,AXIN1,GP9,SEC24B,GNAI3,BSG,ULK1,AGTRAP,FURIN,NCK2,DPP7,STXBP2,STX1A,UQCC,VAMP7,VAMP2,GNA13,POMT1,APPBP2,SREBF1,PTPN23,CLIC4,NOTCH1,HSP90AA1,YWHAB,YWHAE,PKN1,RAB21,PPT1,CLK3,CLN3,COPB1,UNC13D,SCYL2,PACS1,CTSD,STX6,HSPD1,TRPV2,SYTL1,ASPSCR1,COPB2,SLC27A1,TAOK2,ITGB1,DNM2,COPE,RAB8B,TR…
GO: Cellular Component	GO:0031410	cytoplasmic vesicle		7e-05	73	756	ABCA2,SNAP23,EHD1,ACTN1,ACTN4,ADAM10,AP1G2,AP2A2,AP2A1,ALDOA,GIPC1,SIPA1,PACSIN2,HIP1R,CHIC2,ARSA,RIN3,ATP1B3,AXIN1,GP9,SEC24B,GNAI3,BSG,ULK1,AGTRAP,FURIN,DPP7,STXBP2,STX1A,UQCC,VAMP7,VAMP2,GNA13,POMT1,APPBP2,SREBF1,PTPN23,CLIC4,NOTCH1,HSP90AA1,YWHAB,YWHAE,PKN1,RAB21,PPT1,CLK3,CLN3,COPB1,UNC13D,SCYL2,PACS1,CTSD,STX6,HSPD1,TRPV2,SYTL1,COPB2,SLC27A1,TAOK2,ITGB1,DNM2,COPE,RAB8B,TRAF7,FNBP1,SCAMP1,AR…
GO: Cellular Component	GO:0010008	endosome membrane		0.0003	27	181	EHD1,CYBASC3,SH3GL1,AP1G2,VPS52,FAM125B,B2M,VPS16,VAMP7,ARL8B,CHMP5,VPS4A,VPS37A,RAB21,TMEM55A,SCYL2,VAC14,VPS39,VPS37B,TM9SF2,VPS18,SCAMP1,VPS26A,VPS25,RAB5C,LAMP2,RAB22A
GO: Cellular Component	GO:0044451	nucleoplasm part		0.000316	68	714	KIAA1267,MORF4L1,RNPS1,SON,SMARCD1,SMARCC2,SMARCB1,SMARCA2,C19orf2,INTS1,PRPF31,RNF34,SFRS1,PMF1,FRG1,MEN1,WDR5,ATF4,TCF3,TCF12,ATXN7L3,SRRM1,SMNDC1,LMO4,RBM25,CNOT7,MED22,GTF3C1,BRF1,GTF2F1,GTF2F2,IVNS1ABP,TAF12,TAF10,GPS2,SPI1,SRP54,PPP1CC,PPP1CA,SETD1A,MLL4,YWHAB,MED15,MED24,DDX46,RFWD2,MED16,C17orf49,WAC,PHF21A,PLRG1,CTBP1,ARID2,MBD3,RELA,DDX3X,DAXX,GTF3C5,SF3B1,EIF3E,TFEB,MED23,PHF12,PSMC5,L…
GO: Cellular Component	GO:0005681	spliceosomal complex		0.000322	23	139	SNRPB,SNRPA,PRPF31,SFRS1,FRG1,XAB2,SF3B4,SRRM1,SMNDC1,C19orf29,IVNS1ABP,SYF2,RALY,WAC,PLRG1,CDC40,RBM22,DDX41,SF3A2,ZMAT5,SF3B1,DDX23,DHX15
GO: Cellular Component	GO:0044440	endosomal part		0.000336	27	182	EHD1,CYBASC3,SH3GL1,AP1G2,VPS52,FAM125B,B2M,VPS16,VAMP7,ARL8B,CHMP5,VPS4A,VPS37A,RAB21,TMEM55A,SCYL2,VAC14,VPS39,VPS37B,TM9SF2,VPS18,SCAMP1,VPS26A,VPS25,RAB5C,LAMP2,RAB22A
GO: Cellular Component	GO:0000323	lytic vacuole		0.000363	31	228	ABCA2,SNAP23,CYBASC3,SGSH,MAN2B1,ARSA,ATP6V0C,TIAL1,GNS,VPS16,VPS36,DPP7,STXBP2,VAMP7,NAGLU,ARL8B,HYAL2,PPT1,TMEM55A,PRCP,CLN3,UNC13D,IDUA,CTSD,VPS39,USP5,VPS18,FNBP1,PSAP,ATP6V1G1,LAMP2
GO: Cellular Component	GO:0005764	lysosome		0.000363	31	228	ABCA2,SNAP23,CYBASC3,SGSH,MAN2B1,ARSA,ATP6V0C,TIAL1,GNS,VPS16,VPS36,DPP7,STXBP2,VAMP7,NAGLU,ARL8B,HYAL2,PPT1,TMEM55A,PRCP,CLN3,UNC13D,IDUA,CTSD,VPS39,USP5,VPS18,FNBP1,PSAP,ATP6V1G1,LAMP2
GO: Cellular Component	GO:0005794	Golgi apparatus		0.000852	87	1017	GLYCTK,ADAM10,RAB10,AP3D1,AP1G2,AP2A1,B3GAT3,FAAH,PTGES2,RNF24,VCPIP1,PACSIN2,VPS52,CHIC2,ARF5,ARSA,ARL2,FGD3,MGAT2,PCSK7,B2M,NAGPA,ATP6V0C,SDF4,SAR1B,NCOA3,SEC24B,GNAI3,RRAGB,BSG,OSBP,AGTRAP,FURIN,ZMPSTE24,TERF2,VAMP7,VAMP2,RAB33B,ENTPD6,NEDD9,STX10,SREBF1,CDC42,NOTCH1,CD44,USO1,SLC35A1,SLC35A4,SLC35C1,CLSTN1,SACM1L,KIAA1012,LARP7,PRNP,MED15,ERGIC3,SETDB1,RAB21,PPT1,CLN3,COPB1,CNIH,ARFGAP1,SCYL2…
GO: Cellular Component	GO:0005773	vacuole		0.000906	34	274	ABCA2,SNAP23,CYBASC3,SGSH,MAN2B1,ARSA,ATP6V0C,TIAL1,GNS,VPS16,ULK1,VPS36,DPP7,STXBP2,VAMP7,NAGLU,ARL8B,HYAL2,PPT1,TMEM55A,PRCP,CLN3,UNC13D,IDUA,CTSD,VAC14,VPS39,USP5,VPS18,FNBP1,PSAP,ATP6V1G1,VPS41,LAMP2
HUMAN PHENOTYPES AND DISEASES
None
MOLECULAR AND CELLULAR PATHWAYS
None

## Sheet: PC2 MN NLP5
TOPPFUN OUTPUT FOR ALL TRANSCRIPTS AT NLP>5 (P<0.00001) FOR MOTHER-NEWBORN COMPARISON (PC2 in MN study)
				P-value	Hits in List	Count in DB	Targets
TRANSCRIPTION FACTOR BINDING SITES
TFBS	SCGGAAGY_V$ELK1_02	SCGGAAGY_V$ELK1_02		0	231	871	DPM1,CES2,ACTB,TSGA14,ACYP1,TRADD,RNGTT,ARHGEF7,SYNJ1,TAX1BP1,ALAD,MRPL52,AIP,SLC25A4,SLC25A5,APEH,ARF3,FIBP,ATP5A1,ATP1B2,ATP5I,CDC45L,LSM4,PRDX5,BCAT2,BCL2L1,UXT,BNIP2,C1QBP,COPS3,YARS,SLC25A20,BLZF1,LRP10,CGGBP1,HIRIP3,CCND2,CBL,NIF3L1,CARS,HERC4,EIF3H,CNOT10,BECN1,STX10,RFXANK,ZFYVE16,UFC1,GIT2,MED15,TOMM70A,USP3,CKS1B,AP2S1,CPSF3,WDR1,COX8A,DDX47,GMIP,GMPR2,MRPL27,SPG21,COX5B,COX17,UNC13D,WA…
TFBS	MGGAAGTG_V$GABP_B	MGGAAGTG_V$GABP_B		0.000177	151	560	CES2,ACTB,ARHGEF7,SYNJ1,TAX1BP1,AMD1,APEH,ARRB2,FIBP,PICALM,ATP6V1A,CDC45L,PRDX5,BCAT2,BCL2L1,UXT,BNIP2,COPS3,CAPZA1,HIRIP3,ELOVL5,NIF3L1,HERC4,CNOT10,VAMP8,CDH2,CD79B,CD53,BCLAF1,ZFYVE16,UFC1,GAB2,GIT2,CCR7,CCR6,CKS1B,ACSL5,WDR1,DDX47,GMPR2,IL18BP,COX17,UNC13D,YTHDF3,ATP6V1D,CSAD,CTSS,PRKAG2,TRPV2,ELOVL6,INADL,DDIT3,DNMT1,DGUOK,MAGED1,E2F5,MPDU1,E2F3,DUSP5,NUP155,EIF4A1,EGR2,ACSL4,HNRNPA0,RNPS1,…
MICRO RNA BINDING SITES
None
DRUGS
Drug	D020122	tert-Butylhydroperoxide	CTD	0	395	1404	CCNK,ABR,SNAP23,ACTB,TNFSF10,RIPK2,ADAR,ACYP1,SNX4,ADAM19,PARP1,ADM,AES,AK2,ARHGEF7,IER3,EIF2B4,CDC16,ALAD,PAPSS2,AIP,APAF1,ANPEP,PLEK2,BAZ1B,SELENBP1,FAS,H1FX,AURKB,ASPH,TMSB10,FIBP,CCNB2,GALM,SNN,ATP6V1A,BAMBI,LSM4,C21orf33,PRDX5,BCL2L1,KLF9,BST2,BST1,BTF3,NSMAF,HIST1H4C,CAPN5,CSDA,SIPA1L1,PIAS1,OGT,CCNA2,CUL4A,AUTS2,SERPINH1,TPST2,CBS,CASP3,CAT,SCARB2,DYNLL1,TMEM158,CCNF,CCNE1,CDK2,C18orf10,CD…
Drug	D005472	Fluorouracil	CTD	0	336	1176	AARS,CES2,DLK1,TNFRSF10C,TNFSF13,TNFSF10,PARP1,MBD4,ADM,TIMELESS,AKT1,PROM1,CFLAR,CDCA5,APAF1,PRC1,PGLYRP1,BIRC2,ARF1,ARF3,FAS,PTPLA,BUB3,TMSB10,CCNB2,AIFM1,SLC16A6,ATP5D,RAD54B,CDC45L,ATP5O,NRIP1,ATXN10,BID,TMEM184B,BCL2L1,UXT,BLVRB,BNIP3L,HIST1H4C,CST7,CAD,YARS,CCNA2,CCND2,ELOVL5,CUL4A,TPST2,CBS,CASP1,CASP3,CASP4,CASP8,ENTPD1,EIF3H,BRP44,BECN1,CCNF,CCNE1,CCND3,CDK2,CDC25B,CDC34,CDH1,LRBA,CDC20,…
Drug	D002995	Clofibric Acid	CTD	0	211	666	ACADM,ACOX1,FBXO6,GNL3,ABCC3,PARP1,ADSL,SERBP1,EIF2S2,CDC16,PAPSS2,SLC25A5,APEX1,APRT,TMSB10,ATP1A1,ATIC,ATP1B1,PICALM,ATP5O,ATXN10,PRDX5,BCAT2,BTF3,PTTG1IP,REXO2,CAD,PIAS1,CBS,HACL1,CASP4,EIF3F,SCARB1,DYNLL1,CD14,CDK4,TMEM14C,CES1,CUTA,CCS,LSM7,CPSF3,CLNS1A,COX8A,COX7A2,COL4A5,SPG21,ATP6V1D,OPTN,LRPPRC,TRAP1,VKORC1,CTSB,CS,DDX39,DDB1,DDX10,HSPBAP1,DARS,WDR46,NDUFS7,CYB5R3,MED20,POLR1C,RAB3D,DPYD…
Drug	C099555	CD 437	CTD	0	86	196	AK2,SLC25A5,ARF1,ARSA,ARHGDIB,TMSB10,ATP5B,ATP5A1,ATP6V0C,ATP5J,ATP5O,UXT,C11orf10,CST7,CASP3,CASP8,CDK4,KIAA0101,TMEM14C,AP2M1,AP2S1,RBX1,COX7C,COX7A2,COX6C,SLC25A37,PSMF1,ENO1,EIF4A1,EIF4A2,EEF2,KIF2C,FKBP5,RPL35,FTH1,ATP5L,CCT2,STXBP5,HSP90AA1,IL8,ILF2,PABPC1,MEN1,YBX1,ODC1,PRICKLE4,GADD45B,NACA,NDUFS5,NME1,POLR2G,PGAM1,PFN1,SLC25A3,RPL8,RPL11,RPL13,RPL19,SNRPF,SNRPG,SNRPD2,SNRPB,SOD1,SET,RPS1…
Drug	D004052	Diethylnitrosamine	CTD	0	175	560	ACADM,ACOX1,GNL3,ABCC3,PARP1,ADSL,SERBP1,EIF2S2,PAPSS2,APEX1,APRT,TMSB10,ATP1A1,ATIC,ATP1B1,PICALM,ATP5O,ATXN10,BCAT2,BCL2L1,BTF3,REXO2,CAD,PIAS1,CBS,CASP4,CAT,SCARB1,DYNLL1,CD14,CCNE1,CDK2,CDK4,CES1,CUTA,CCS,LSM7,CPSF3,CLNS1A,COX7A2,ATP6V1D,OPTN,TRAP1,VKORC1,CTSB,DDB1,HSPBAP1,WDR46,MED20,POLR1C,RAB3D,DPYD,ENO1,HDDC3,SLC27A2,WDR61,EBNA1BP2,ERP29,PUS1,FHIT,ERCC3,ZMYND11,F5,WDR6,CDC37,FOS,WDR5,DCAK…
Drug	D019833	Genistein	CTD	0	255	908	SRXN1,TNFSF10,MBD2,SKAP2,ADRA2C,AKT1,IER3,PROM1,FCGBP,ANK1,CDCA5,APAF1,PRC1,SOCS3,APEH,PGLYRP1,ARF1,ARG1,SELENBP1,AURKB,CCNB2,ATP1B1,ATP5G2,ATP6V1A,CDC45L,ATP5O,NRIP1,BCL2L1,BCL3,BSG,ZFP36L1,BTF3,HIST1H2AC,CAPN5,MADD,CCNA2,ELOVL5,RUNX2,CASP3,CAT,SCARB2,CD14,CDK2,CDH2,CDC25B,CDH1,CDC20,CD68,CD58,KIAA0101,RASSF2,CHEK1,MELK,CENPA,CENPE,CENPF,GINS2,CKS1B,MAFB,CLNS1A,CPA3,ABI1,CRK,SHISA5,COL6A3,SMC4,C…
Drug	CID000000730	guanosine diphosphate	Stitch	0	191	651	DPM1,ABR,RNGTT,ADSL,AP1G1,AKT1,EIF2S2,EIF2B4,BSCL2,ARF1,ARHGDIB,RHOB,ART4,ATIC,ARHGEF1,BCR,GPSM1,EIF3I,EIF3J,EIF3D,ENTPD1,EIF3F,EIF3G,EIF3H,EIF3B,RPL36,VAMP8,RICS,LYST,PSMD6,FGD4,ARHGAP25,CRK,GMIP,EEF1A1,ELF2,EIF4A1,EIF4A2,EIF4G1,EIF5,EIF2B1,EEF2,EEF1G,EEF1B2,FAU,GNB4,ERCC3,RRM2B,F2R,AKAP13,RPL35,FUT7,FUT6,WDR5,GNG5,GNG10,GNAQ,SEC24B,GNB2,RGS19,GUK1,GZMM,GTF2H4,GTF2F2,HCK,GNA13,GRB2,HPRT1,HNRNPD,…
Drug	D018038	Sodium Selenite	CTD	0	308	1188	RPL10L,ABCF1,SNAP23,ACTB,TNFSF10,TNFRSF25,TRADD,ADD1,TOP3B,PARP1,ADSL,AKT1,SYNJ1,FBXL5,CD84,SPAG9,ANXA11,AIP,SLC25A5,APEX1,BIRC2,APRT,ZMYM6,ART4,ARHGEF1,AIFM1,ATP5G2,PRDX5,GTPBP6,BCL2L1,UXT,C11orf2,PTTG1IP,COPS3,CAMP,SIPA1L1,KHSRP,BLZF1,LRP10,ACOT11,GPR65,CCND2,CASP3,CASP8,CAT,SCARB1,NUMB,CD14,CCNE1,CDK4,RUVBL1,CDH2,SKAP1,CD53,ANAPC11,TMEM14C,CXXC5,CEBPE,CD52,CETN2,CENPE,CKS1B,CKS2,CLNS1A,COX8A,D…
Drug	D004317	Doxorubicin	CTD	0	228	822	CES2,FADD,ACADVL,ACP1,TNFSF10,ACTN4,RIPK2,TNFRSF25,ABCC3,ADAM19,PARP1,AHCY,AKT1,CFLAR,APAF1,PRC1,SLC25A4,BIRC2,CKAP2,FAS,AURKB,BUB3,ARHGEF1,CCNB2,AIFM1,ATP5I,BDKRB1,BID,BCL2A1,BCL2L1,NSMAF,GFI1B,HIST1H2BC,LMO4,KHSRP,CCNA2,CCND2,SERPINH1,CASP1,CASP5,CASP3,CASP4,CASP8,CAT,BECN1,CCNE1,CDK2,CDK4,CHEK1,MELK,BBS12,CES1,CENPA,MVP,LSM7,CPT1A,NUSAP1,CREBBP,COL6A3,COX17,KLF6,TRIM28,CTSS,TRAP1,CTSB,CTSG,KIF…
Drug	CID000000762	guanosine triphosphate	Stitch	0	251	926	IQGAP1,ABR,GNL3,RNGTT,ADORA2A,ADSL,AP1G1,AKT1,EIF2S2,EIF2B4,BSCL2,ARF1,ARF3,MGAM,ARHGDIB,RHOB,ART4,CTDP1,ATIC,ARHGEF1,BCR,BCL6,CBL,GPSM1,EIF3I,EIF3J,EIF3D,ENTPD1,EIF3F,EIF3G,EIF3H,EIF3B,RPL36,PRKD2,VAMP8,COBRA1,RICS,LYST,TH1L,PSMD6,FGD4,ARHGAP25,CRK,GMIP,NUP37,KIF20A,CSNK2B,CSNK1D,DCK,GTF3C5,DNA2,DGUOK,MAP4K4,EEF1A1,ROCK2,POLR1C,RAB3D,NUP155,EIF4A1,EIF4A2,EIF4G1,EIF5,NUP93,EIF2B1,EEF2,EEF1G,EEF1B…
Drug	C006632	arsenic trioxide	CTD	0	161	536	TNFSF13,TNFRSF25,RSL1D1,PARP1,AKT1,ALDOC,CFLAR,ANPEP,FAS,RERE,CCNB2,LHX6,MTA1,ATP5A1,ATP1B1,BCR,BAMBI,BID,BCL2A1,BCL2L1,ZFP36L1,BLVRB,BNIP3L,HIST1H4C,BACH2,BLZF1,CCND2,KLF11,CASP1,CARS,CASP3,CASP8,CAT,CD14,TMEM158,BECN1,EVL,CHEK1,CEBPE,CD52,SERTAD2,GIT2,CLC,SMC4,PLXNC1,MAPK14,CSF2RB,DDIT3,PTTG1,PDLIM7,CYP26A1,C5orf13,DNMT1,CYB5R3,DEFA4,DEFA1,ITM2A,IER2,CREB5,N4BP1,EGR1,OS9,FGR,SLCO3A1,RNF24,CHEK2…
Drug	C017947	sodium arsenite	CTD	0	236	877	SRXN1,CES2,FADD,ACTB,TNFSF10,ADAM19,PARP1,AKT1,IER3,EIF2B4,CDC16,CFLAR,BAZ1B,APEX1,BIRC2,FAS,AURKB,ARHGDIB,RHOB,USP8,DNAJA3,NRIP1,BCL2A1,BCL2L1,BCL6,PIP5K1B,ZFP36L1,BLVRB,BLVRA,HIST1H2AC,CA2,CSDA,CAMK2G,CAPZA1,CCNA2,CCND2,SERPINH1,CASP1,CASP3,CASP8,CAT,BECN1,CCNF,CCNE1,CCND3,CDK4,CDH2,CDC25B,CDH1,CDC20,CENPA,CENPE,CCR7,CPA3,CREBBP,TRAP1,MRPS17,MAPK14,CSNK2B,CSNK1D,UBE2L6,DDIT3,PTTG1,MAPKAPK2,RPS6…
Drug	D015741	Metribolone	CTD	0	112	339	ACTB,ACTG1,ADAM7,HERC3,AKT1,PHGDH,SOCS2,AIP,SELENBP1,ATP1A1,MYL6B,UXT,BLVRA,CASC4,CAPZA1,PIAS1,CCNA2,NCOA1,CDH1,CHEK1,ERGIC3,PSMD6,AP2M1,CREBBP,TRIM28,CTSB,C1orf116,DDX1,DARS,GDF15,PRDX6,ENO2,EEF2,EEF1G,FASN,ACSL3,STIP1,BLCAP,FKBP5,RUVBL2,SDCCAG3,EWSR1,FTH1,XRCC6,HIBADH,NDRG1,GOT2,ABCC4,SDCCAG10,CAMKK2,GSPT1,LSM1,GNMT,HSPB1,HSP90AA1,EIF3K,SFXN4,IDH1,ITGB1,TUBB,EIF3E,ILF3,MAF,PABPC1,RPSA,KRT1,KRT1…
Drug	D011794	Quercetin	CTD	0	199	716	SRXN1,FADD,ACADVL,ACTB,TNFSF10,TRADD,PARP1,MBD4,AKT1,IER3,CDC16,CFLAR,LDB2,APAF1,ANPEP,SLC25A5,APEX1,ARG1,SELENBP1,ARF3,FAS,H1FX,AURKB,ARHGDIB,AIFM1,SLC16A3,RAD54B,BCR,BID,BCL2L1,BLVRB,HIST1H2AC,HIGD1A,CCND2,RUNX2,CASP1,CASP3,CASP8,CAT,NCOA1,CCNF,CCNE1,CCND3,CDK2,CDK4,CDH2,CREBBP,HNRPDL,TSPAN3,COL6A3,CTSO,CS,DDIT3,STK17B,DARS,RPS6KA5,CYP2J2,CYP1B1,DNMT1,DEFA1,KIF23,ECH1,GDF15,E2F2,E2F3,CD24,ATP5J…
Drug	C005961	bis(tri-n-butyltin)oxide	CTD	0	60	146	ACADM,BCL10,AKT1,TAX1BP1,APEX1,RHOB,CCNB2,SNN,ATP5I,BID,KLF9,BNIP3L,GFI1B,CCNA2,CD247,CD3D,CCND3,CDC25B,CDR2,COX7A2,TRIM10,KIF20A,MAPK14,STK17B,COX5A,DUT,DUSP5,EGR1,METAP2,ETS1,EZH2,RIPK3,TACC3,APOL3,GYPA,KLF1,GPX1,IFRD1,IGF2R,ICAM4,JUNB,ISG20,IRF1,ILF3,LIG1,MYH10,NFE2L2,POLE2,MAPK1,NCAPG,SON,SOD1,SNCA,ORC6L,RRM1,PRDX2,STAT5B,YWHAH,ZFP36,TXNRD1
Drug	D014810	Vitamin E	CTD	0	355	1453	TRPM6,IQGAP1,RIOK3,ACP1,ACTB,TNFSF10,ACTN4,ADD1,EDF1,PARP1,MBD4,SKAP2,ADRA2C,AEBP1,SERBP1,AKT1,AK1,CDC16,CFLAR,BIN1,AMY2A,LDB2,INTS6,ANXA6,SLC25A4,BAZ1B,APEX1,BIRC2,BSCL2,ARF3,CKAP2,SFRS2IP,FIBP,ATOX1,ATP5B,DNAJA3,ATP5I,CBY1,C21orf33,SAMM50,BARD1,YIPF3,BCL2L1,BCL6,KLF9,BST2,ZNF358,BLVRA,CSDA,CAMK2G,PIAS1,CCND2,CUL4A,AUTS2,CASP3,CAT,ENTPD1,CD1C,CCND3,CDK4,CDC25B,BCLAF1,KIAA0101,EVL,ISYNA1,PHACTR2,…
Drug	C019499	2-nitrofluorene	CTD	2e-06	58	143	CES2,PHGDH,APEX1,RHOB,TMSB10,ATP5G1,CDK4,CDC20,ATP6V1D,CTSS,PTTG1,DKC1,CYB5R3,GDF15,DUT,DUSP6,DPYD,EEF2,EEF1G,FKBP4,GCLC,HDC,GNMT,HSPB1,HSPE1,IRF1,CXCL10,RPSA,STMN1,MT2A,MT1A,MCM6,ODC1,PCNA,MYC,RPL10A,ZMAT3,RPL6,RPL8,RPL13,RPL17,RPL15,PSMD1,PSMB8,PSMB9,PSMC2,RPS7,RPS4X,RPS3,RPS24,RPS15A,RPS19,TOP2A,TAP1,STAT1,TYMS,CCT3,PTP4A1
Drug	D006830	Hydralazine	CTD	2e-06	204	756	SRXN1,PARP1,ADSL,OCIAD2,AES,AOAH,SLC25A5,ARF1,ASPH,TMSB10,ART4,DNAJA3,ATP5I,ATP5J,C21orf33,SAMM50,MYL6B,BPGM,CASC4,SIPA1L1,LRP10,OGT,SNAI3,RPL36,DYNLL1,NUMB,USP49,CD1C,STX11,CDK4,CHMP5,ANAPC11,CDR2,SERTAD2,FAM3A,LPGAT1,COX7C,KLF6,RCL1,C8orf55,NAMPT,RWDD1,POP5,TRAPPC6A,TRAPPC4,ELOVL6,UBE2L6,DDT,RPS6KA5,WDR46,C5orf13,CYB5R3,PHC2,RAB3D,GPR125,CREB5,YWHAQ,AFG3L2,FHIT,HPSE,EPRS,F12,FTH1,CDC37,C10orf35…
Drug	C472791	3-(4'-hydroxy-3'-adamantylbiphenyl-4-yl)acrylic acid	CTD	5e-06	163	578	IQGAP1,ACTB,ADA,AK2,AK1,CFLAR,SOCS2,FCGBP,APAF1,ARF1,ARSA,RHOB,TMSB10,ATP5B,ATP5A1,ATP5I,ATP5J,ATP6V1A,KLF9,UXT,NSMAF,C11orf10,HIST1H2AC,CAMK2G,CAD,CASP3,DYNLL1,VAMP8,CDK4,CDH1,KIAA0101,RASSF2,TMEM14C,AP2M1,AP2S1,RBX1,CUEDC1,COX7C,FRAT1,COX7A2,COX6C,NUSAP1,COX5B,SLC25A37,WASF2,VKORC1,RNF26,PTTG1,CCPG1,PSMF1,RAB23,ENO1,EIF4A1,EIF4A2,N4BP1,EEF2,KIF2C,FKBP5,ETS1,DCTN3,TBC1D8,FOS,NOSIP,GCH1,CCDC117,C…
Drug	D011441	Propylthiouracil	CTD	6e-06	114	368	CES2,ADD1,ALDOC,AMY2A,ARG1,AIFM1,ATP6V1A,GTF2H5,BTF3,CA2,PTTG1IP,C1QBP,CSDA,AKR7A2,CCNA2,CASP3,DHRS7B,ISYNA1,AP2M1,COX4I1,CSNK2B,DNMT1,PRDX6,DPYD,ENO1,EIF4A2,EEF1G,SLC27A2,KIF2C,ERP29,RNPS1,PGRMC1,ESD,ETFB,KATNA1,ZWINT,DCXR,COPS4,GNB2L1,CEPT1,ST3GAL6,PGCP,GAPDH,GAMT,TMED7,HRSP12,GCHFR,HBB,HDC,H3F3B,HAL,GPX1,GPX4,PAICS,GRB2,HPRT1,HMGN1,TMEM97,CLPTM1L,CAPRIN1,PABPC1,LMNB1,LDHB,MBP,MCM4,MCM5,MCM2,NR…
Drug	D004054	Diethylstilbestrol	CTD	7e-06	181	661	ACTB,TNFSF14,TNFSF10,GNL3,TNFRSF25,SKAP2,ADRA2C,AP2B1,AEBP1,AKT1,IER3,PHGDH,PROM1,SOCS2,FCGBP,PAPSS2,PGLYRP1,APEX1,ARG1,SELENBP1,ARHGDIB,TMSB10,ATP6V1A,ATP5O,BAMBI,BCL2L1,KLF9,BSG,BNIP3L,CAPN5,LMO4,CASP3,CASP8,SCARB2,DYNLL1,NCOA1,CD14,CDK4,CDH1,CDC20,CD68,CKS1B,CKS2,MAFB,ACSL5,SHISA5,COL6A3,CTBS,CYB561,CTSB,DDIT3,PTTG1,CYP1B1,KLF4,DNMT1,DKC1,GDF15,DUT,DUSP6,EI24,DPYD,ENO1,ENO2,SLC29A1,ISG15,EGR1,…
Drug	C008493	methylselenic acid	CTD	8e-06	120	395	TNFRSF25,PARP1,AKT1,ALAD,BIRC2,RHOB,NMI,LAGE3,C21orf33,BCL2A1,C1QBP,CAMK2G,CAPZA1,CCNA2,PPFIA1,CASP3,TOR1AIP1,NCOA1,CD14,CDK2,CDK4,CDK6,CDC20,CDKN2D,CENPA,CENPF,OPTN,TRIB1,DDIT3,KLF4,DKC1,QKI,E2F5,DVL3,DPYD,STOM,ENO2,EGR1,ACSL3,FKBP4,FKBP5,FHL2,ERCC1,EXT1,ETV6,CHEK2,FYN,FOXO3,RAB31,NDRG1,ABCC4,MAEA,GBP2,H1F0,C6orf108,CDC42EP3,GSK3B,DEAF1,ID3,IDS,IFI16,KIF11,KCNH2,JUNB,KLHL2,ITGB1,ITGB5,IRF1,ING1,…
Drug	C059514	resveratrol	CTD	9e-06	159	565	FADD,ACOX1,ACTB,TNFSF10,PARP1,AKT1,CDC123,ALDOC,CFLAR,APAF1,APEX1,BIRC2,FAS,BUB3,CCNB2,AIFM1,ATP5B,ATP5A1,BID,BCL2A1,BCL2L1,BCL6,BSG,BNIP2,COPS3,MADD,CCNA2,RUNX2,CASP3,CASP8,CAT,CD14,CCNE1,CDK2,CDK4,CDK6,CDH2,CENPE,CENPF,CCR2,CKS2,CREBBP,SMC4,MAPK14,TP53INP1,DDIT3,MAPKAPK2,STK17B,RPS6KA5,CYP1B1,COX5A,KIF23,GDF15,DYRK1A,EI24,IER2,EPHA4,ENO1,ENO3,ENO2,EIF4A2,EGR1,FASN,RRM2B,PTGES2,G6PC,FOXO1,FOXO3,…
Drug	D019256	Cadmium Chloride	CTD	1.3e-05	91	277	ACOX1,ACP1,TNFSF10,PARP1,AKT1,IER3,BIRC2,TMSB10,ATP1A1,AIFM1,BID,GTPBP6,PIP5K1B,HIST1H2AC,CCNA2,CASP3,CASP8,CAT,CDK2,CHEK1,PSMD6,CPT1A,MAPK14,PTTG1,CYP1B1,EEF1A1,GDF15,PRDX6,STOM,FASN,OS9,FABP5,CHEK2,G6PC,FOS,GCLC,GOT1,GAPDH,GSTP1,HCK,HBB,HDGF,GPX1,HSPB1,HSP90AA1,CIDEB,IL8,IGF2R,HSPE1,JUNB,LRPAP1,CACYBP,STMN1,MT2A,MT1A,MT1E,MATK,MCM5,MCM2,MCL1,ALDH6A1,NTHL1,NUCB2,PRDX1,PCNA,MYC,NFE2L2,NFIX,PRNP,M…
Drug	D013876	Thiophenes	CTD	1.8e-05	34	68	TNFSF10,BIRC2,NMI,EIF3B,CD53,RCBTB2,CSE1L,DDX10,DEFA1,RUVBL2,GARS,GSTP1,HDAC1,PRMT1,IL8,IFIT3,LAMP2,MPO,NTHL1,MYC,PPM1G,PIM1,RARA,RAP2A,ABCE1,PSMB9,RABGGTB,DDX58,TGM2,STK10,STAT1,WIPF1,UBE3A,TPM4
Drug	D011078	Polychlorinated Biphenyls	CTD	4.7e-05	72	207	ACOX1,PRC1,AURKB,CCNB2,ATP1B1,CDC45L,ZFP36L1,HIST1H2AC,CCNA2,CAT,CDK2,CDC20,KIAA0101,CHEK1,MELK,CENPA,CENPF,GINS2,CKS1B,SMC4,CTPS,KIF20A,CYP1B1,DNMT1,KIF23,FEN1,FKBP4,ZWINT,ABCC13,UBE2C,TACC3,PLK4,HADH,SMC2,MXD4,ASPM,TMEM97,ID3,KIF11,JUP,ITPK1,ILF2,CDT1,STMN1,MYB,MCM6,MCM2,MCM7,PCNA,KIF15,MYC,NCL,NEDD9,MCM10,CENPN,UHRF1,RACGAP1,RARA,UBE2T,ATAD2,SOD1,TK1,TNF,TOP2A,TFF3,AURKA,CHSY1,TUBB6,UROD,UNG,T…
Drug	D003474	Curcumin	CTD	5.3e-05	161	587	AARS,TNFSF10,TRADD,PARP1,AKT1,ALDOC,CFLAR,APAF1,SOCS3,BIRC2,H1FX,ARHGDIB,BCL2A1,BCL2L1,BCL3,BSG,ZFP36L1,C1QB,RUNX2,CASP1,CASP3,CASP4,CASP8,CAT,DYNLL1,CD14,CCNE1,CDK4,CDK6,CDH1,RASSF2,CHEK1,CDKN2D,CES1,CCR2,CPT1A,CREBBP,COL4A5,KLF6,CS,MAPK14,CSF2RB,DDIT3,CCPG1,CYP1B1,NMT2,ITM2A,PGS1,ECH1,E2F5,DUSP5,ENO1,ELF2,EIF4G1,EGR1,FBLN2,FCGR3A,ERCC1,UTP14A,PTGES2,SLC37A4,TBC1D8,XRCC6,FOXO1,FOS,LILRB3,GCLC,GO…
Drug	D014635	Valproic Acid	CTD	6.5e-05	208	804	SRXN1,PARP1,ADSL,OCIAD2,AES,ANXA11,AOAH,SLC25A5,ARF1,ASPH,TMSB10,ART4,DNAJA3,ATP5I,ATP5J,C21orf33,SAMM50,MYL6B,BPGM,CASC4,SIPA1L1,LRP10,OGT,CCND2,CASP3,SNAI3,RPL36,DYNLL1,NUMB,USP49,CD1C,STX11,CDK4,CHMP5,ANAPC11,CDR2,SERTAD2,FAM3A,LPGAT1,COX7C,KLF6,RCL1,C8orf55,NAMPT,RWDD1,POP5,TRAPPC6A,TRAPPC4,ELOVL6,UBE2L6,DDT,RPS6KA5,WDR46,C5orf13,CYB5R3,PHC2,RAB3D,GPR125,CREB5,FASN,YWHAQ,AFG3L2,HPSE,EPRS,F12,…
Drug	CID005311048	cisplatin	Stitch	7.2e-05	150	540	FADD,TNFRSF10C,TNFSF10,TNFRSF25,ABCC3,TOP3B,PARP1,AKT1,CFLAR,APAF1,BIRC2,FAS,CCNB2,AIFM1,PRDX5,BARD1,BCKDHB,BCL2L1,OSGIN2,CCND2,CASP1,CASP5,CASP3,CASP4,CASP8,CAT,PRKD2,CDK2,CDA,CHEK1,CCR6,MVP,TNFSF15,RBX1,CRK,RDM1,SPG21,CTBS,TRAP1,MAPK14,TRPV2,DDB1,DCK,DDIT3,STEAP4,PALB2,GRAP2,GDF15,DUT,C16orf53,DPYD,BRE,ENO2,EGR1,FANCE,FEN1,ERCC1,ERCC3,RRM2B,PMF1,SUPT16H,XRCC6,FOXO3,FOS,FXN,GCLC,ZNHIT1,GART,ABCC…
Drug	D001554	Benzene	CTD	7.3e-05	109	361	ACTB,PARP1,AHCY,ALAS2,APAF1,ANPEP,SOCS3,RHOB,ATP5I,BCL2L1,ELOVL5,HACL1,RUNX2,CASP1,CASP3,CASP4,CASP8,CAT,CCNF,CCND3,CDK6,CD53,CCR7,USP3,CRK,TSSC4,NAMPT,INADL,MAPKAPK2,ECE1,IER2,STOM,EIF4A2,EGR2,EGR1,EEF2,FASN,YWHAQ,BLCAP,FKBP5,F5,RPL35,G6PC,FOS,GCLC,GSTP1,HBB,MTX2,H3F3B,TGOLN2,GSK3B,DNAJB2,CXCL16,HINT1,HHEX,IL4R,IL6R,IL8,IFRD1,IDH1,KIFC1,IRF1,IL13RA1,LTB,LTBR,PDE7B,MPO,NUDT1,MT1A,MYB,MTPN,MFGE8,P…
Drug	C063002	2,3-dimethoxy-1,4-naphthoquinone	CTD	8.3e-05	53	137	TNFSF10,ADM,CCNB2,GTPBP6,HIST1H4C,CCNA2,CDH2,CDC25B,CDC20,CETN2,CKS2,NUSAP1,SMC4,PTTG1,KIF23,IER2,KIF2C,ACSL1,OS9,RUVBL2,F5,ZWINT,UBE2C,GCLC,C6orf48,SQRDL,CIDEB,HMGA1,HIF1A,IFRD1,MAD2L1,ST6GALNAC4,MCM2,ALDH6A1,NUCB2,NEDD9,POLE2,NCAPG,RFC4,RACGAP1,RAD23B,SNRPA,SFRS7,SFRS2,SCD,MAFF,TSPAN7,TNF,AURKA,TPX2,TXNRD1,TYMS,TUBA1A
Drug	CID000000753	glycerol	Stitch	9.6e-05	213	831	ERAL1,SIGLEC5,ACOX1,ACP1,ACTN4,ACYP1,ADSL,AP2B1,ALDOC,APEX1,ARG1,MGAM,CTDP1,ATIC,ATP5B,ATP5A1,ATP5D,ATP6V0C,ATP6V1A,BARD1,BCAT2,ASF1A,BCKDHB,CA2,C2,CAD,AKR7A2,CCNA2,CBS,CAT,PRKD2,BECN1,CDK2,KIAA0101,PTDSS1,ISYNA1,SIRT7,CCS,CLC,CLK2,CPT1A,COL4A5,COX5B,PGAM5,CTSB,CS,MAPK14,PSMD14,CSNK2B,DDB1,NPEPL1,DNMT1,DEFA3,DEFA1,ARID4B,ENO1,ENO3,ENO2,EIF5,CARS2,FASN,FCGR2A,CYBASC3,ERCC1,ERF,EPRS,WDR4,RPP40,RRM2…
Drug	C006780	bisphenol A	CTD	0.000107	124	428	SOCS2,PRC1,APEH,SELENBP1,H1FX,AURKB,CCNB2,ATP1B1,SNN,CDC45L,ATP5O,NRIP1,ZFP36L1,HIST1H2AC,CA1,CCNA2,CASP3,CAT,SCARB1,NCOA1,CDK2,CDH2,CDC20,KIAA0101,RASSF2,CHEK1,MELK,CENPA,CENPF,GINS2,CKS1B,SMC4,CTPS,KIF20A,DDIT3,STK17B,CYP1B1,KLF4,KIF23,ECH1,ENO1,EGR1,EGR3,FEN1,FKBP4,ZWINT,FOS,ABCC13,UBE2C,TACC3,GOT1,PLK4,HBB,HBE1,HDAC1,HADH,SMC2,MXD4,GRIN1,HSP90AA1,HSPA6,ASPM,TMEM97,ID3,KIF11,JUP,JUNB,ITPK1,ITG…
Drug	D014747	Vinblastine	CTD	0.000113	69	199	ACP1,PRC1,BIRC2,CKAP2,AURKB,CCNB2,ATP5I,NSMAF,CAT,CDK2,MELK,CENPA,LSM7,NUSAP1,COX17,KIF20A,PTTG1,COX5A,KIF23,ATP5J2,YWHAQ,WDR61,FEN1,PGRMC1,RAB11FIP1,ETFB,TMEM134,ZWINT,NDUFA13,GSTP1,GTF3A,IGF2BP3,HADH,HMMR,TMEM97,IL8,KIF11,KIAA1598,OIP5,MAD2L1,TRMT5,LMNB1,ABLIM1,MME,OAZ1,ODC1,SERPINB2,KIF15,MYC,SNX10,NDUFA1,NDUFA3,NDUFB2,NCAPG,PDHB,RACGAP1,RANBP1,RPA3,DCPS,SOD1,SKP2,ORC6L,TOP2A,QRICH1,TDG,CDCA8,…
Drug	CID000003310	etoposide	Stitch	0.000126	167	621	FADD,TNFSF10,TNFRSF25,ABCC3,TOP3B,PARP1,AKT1,IER3,CFLAR,ASH2L,APAF1,PRC1,ANPEP,BIRC2,FAS,CTDP1,AIFM1,BCR,BID,PRDX5,BCKDHB,BCL2L1,NCK2,HIST1H4C,MADD,CASP1,CASP5,CASP3,CASP4,CASP8,CD34,BRI3BP,NCOA1,CD19,CD7,BECN1,STX11,CDK2,CDK4,CDK6,CDA,CHEK1,TH1L,PTPLAD1,CCR6,MVP,PARP3,CR2,SPG21,UNC13D,MAPK14,TP53INP1,MPZL2,CSNK1D,DCK,DDX10,DDIT3,DNTT,DUT,C16orf53,H2AFY,EI24,ENO2,FEN1,CDK5RAP3,ERCC1,EWSR1,CHEK2,Z…
Drug	C016583	4-(N-methyl-N-nitrosamino)-1-(3-pyridyl)-1-butanone	CTD	0.000254	63	179	CES2,PHGDH,APEX1,RHOB,TMSB10,ATP5G1,CDK4,CDC20,ATP6V1D,CTSS,PTTG1,CYP1B1,DKC1,CYB5R3,GDF15,DUT,DUSP6,DPYD,EEF2,EEF1G,FASN,FKBP4,GCLC,HDC,GNMT,HSPB1,HPRT1,IL8,HSPE1,IRF1,CXCL10,RPSA,STMN1,MT2A,MT1A,MCM6,ODC1,PCNA,MYC,RPL10A,MAPK3,MAPK1,ZMAT3,RPL6,RPL8,RPL13,RPL17,RPL15,PSMD1,PSMC2,PTGS2,RPS7,RPS4X,RPS3,RPS24,RPS15A,RPS19,TOP2A,TAP1,STAT1,TYMS,CCT3,PTP4A1
Drug	D015054	Zymosan	CTD	0.000319	98	323	ACADM,RIPK2,SIRPA,ADD1,PAPSS2,SOCS3,BDKRB1,PRDM1,BCL3,BNIP2,CASP3,CAT,MARCO,EVL,CD52,CCR2,MAFB,COL4A5,PHF21A,MAPK14,TRIM13,ELF2,EIF4G1,EGR2,EGR1,EGR3,FCGR3B,HPSE,ESRRA,FABP5,F5,FTL,FOS,TBCEL,GCLC,CDC42EP2,IRAK4,CEPT1,GM2A,TLR6,RRAGD,GSPT1,HSP90AA1,IL1RN,IL8,JUNB,ITGAM,IRF1,IRF2,LYL1,TBC1D14,LEP,LFNG,MPO,MIF,CLEC7A,MYD88,CASS4,NCF2,NCF4,RTN4,RFFL,FAM126B,MAPK3,MAPK1,NFKBIZ,PFTK1,DDX60,SLC43A2,RAB2…
Drug	D002945	Cisplatin	CTD	0.000423	123	433	CES2,ABR,FADD,TNFSF13,TNFSF10,TRADD,CTNNAL1,PARP1,AKT1,CFLAR,SOCS2,APEX1,BIRC2,FAS,AIFM1,NMI,BCL2L1,ZFP36L1,CA2,YARS,CASP3,CASP8,CAT,RPL36,CCNE1,CD151,MVP,CREBBP,COL4A5,OPTN,TRAP1,DDIT3,WDR46,GDF15,DPYD,SLC29A1,FASN,ACSL3,FEN1,ERCC1,XRCC6,FOS,ABHD2,GCLC,IFI30,GOT2,GARS,DENND4A,GUK1,GSTP1,RRAGD,SPINT2,GPX1,RBCK1,HSPB1,CIDEB,CTDSP1,HIF1A,HHEX,HLA-G,HLA-A,IL4R,IL8,SP110,HSPE1,IL13RA1,MPO,BCL2L12,NUD…
Drug	C041786	palm oil	CTD	0.000448	343	1476	FBXO4,SRXN1,ACADM,ACADVL,TNFSF10,ACTN4,B3GALNT1,CTNNAL1,ANKRD9,SNX4,SKAP2,AEBP1,AK2,ARHGEF7,IER3,ALAD,PROM1,SLC25A5,BSCL2,FAS,ARSA,ARRB2,ARNTL,ARHGDIB,ATP1A1,SLC16A3,ATP1B1,ATP1B2,SLC10A3,BCAT2,BCKDHB,KLF9,BLVRB,C1QB,C2,C5AR1,LMO4,SLC25A20,PLEKHG3,IRF2BP2,ELOVL5,SERPINH1,RAB11FIP5,CASP4,CASP8,SNAI3,CD34,CD14,VAMP8,CDK2,CD97,CD68,CD53,CXXC5,CD52,CENPA,SERTAD2,CCR2,CNN2,DHRS7,MVP,CKS1B,CD302,ACSL5,…
Drug	C014347	decitabine	CTD	0.000473	198	776	ACADVL,DLK1,TNFSF13,B3GALNT1,MBD2,ADRA1D,AEBP1,IER3,ALDOC,FCGBP,ANXA6,PSTPIP1,APAF1,ANPEP,SLC16A3,ATP5B,MTMR6,ATP1B1,ATP1B2,QPCT,BCL2L1,BST2,ZFP36L1,BNIP3L,CAPN5,CST7,CAPN3,CASP3,CASP8,DYNLL1,MS4A3,CD14,BECN1,CCNF,VAMP8,RUVBL1,CDH2,CDH1,CDA,RASSF2,CHEK1,CDKN2D,CENPF,CLEC2B,CPA3,WBSCR22,TRIM10,C1RL,COX5B,DHRS9,FAM8A1,MAPKAPK2,STK17B,CYP1B1,DNMT1,TMEM18,GDF15,CD24,DUSP6,PRDX6,DPYD,EPB41,EPHA1,ENO1,…
Drug	D013853	Thioacetamide	CTD	0.000531	133	479	CES2,ACTB,ADD1,ADORA2A,SOCS3,ARG1,FAS,ATP6V1A,GTF2H5,BCL2L1,BTF3,CA2,PTTG1IP,C1QBP,AKR7A2,CASP3,CASP8,CAT,CDK4,DHRS7B,CD79B,ISYNA1,CCR1,LTB4R,AP2M1,COX4I1,CTSB,MAPK14,DDX39,CSNK2B,ATP5J2,PRDX6,DPYD,ENO1,ENO3,EIF4A2,EEF1G,SLC27A2,ACSL3,ERP29,RNPS1,HPSE,PGRMC1,ESD,ETFB,GAST,ZWINT,DCXR,GCLC,COPS4,CEPT1,GOT1,ST3GAL6,PGCP,GAPDH,GAMT,TMED7,HRSP12,GCHFR,GSTP1,HBB,HDC,H3F3B,HAL,HADH,GPX1,GPX4,PAICS,HSP90…
Drug	D017239	Paclitaxel	CTD	0.000544	116	404	PARP1,AKT1,IER3,CFLAR,BIN1,APAF1,PRC1,BIRC2,ARF3,FAS,CCNB2,AIFM1,ATP6V1A,BID,BCL2L1,HACL1,CASP3,CASP8,CAT,CD14,BECN1,VAMP8,CDA,RFXANK,CHEK1,MELK,NUSAP1,COL6A3,COX17,NAMPT,HOOK1,CTSL1,MAPK14,PRRG4,UBE2L6,ECH1,E2F3,CD24,DPYD,ISG15,EFNA1,FASN,WDR61,TMEM134,FTH1,FTL,G6PC,IFI30,NDUFA13,GAMT,ABCC4,GCHFR,GSTP1,SPINT2,CXCR6,GPI,ASPM,CIDEB,HMBS,HIF1A,IL8,ITGB5,ITGAM,IRF7,TUBB,CXCL10,MAD2L1,LAMP2,STMN1,MT2…
Drug	D001553	Benzbromarone	CTD	0.000573	87	280	CES2,ADD1,ARG1,ATP6V1A,GTF2H5,BTF3,CA2,PTTG1IP,C1QBP,AKR7A2,CASP3,DHRS7B,ISYNA1,AP2M1,COX4I1,CSNK2B,PRDX6,DPYD,ENO1,EIF4A2,EEF1G,SLC27A2,ERP29,RNPS1,PGRMC1,ESD,ETFB,ZWINT,DCXR,COPS4,CEPT1,ST3GAL6,PGCP,GAPDH,GAMT,TMED7,HRSP12,GCHFR,HBB,HDC,H3F3B,HAL,GPX1,GPX4,PAICS,HPRT1,HMGN1,TMEM97,CLPTM1L,CAPRIN1,PCCB,NDUFS5,NME2,MAP2K2,DNAJC3,PGAM1,SLC25A3,SERPINA1,RPL11,RPL13,RPL17,RPL15,RPL3,RPL4,PSMD1,PSMD4…
Drug	CID000000190	adenine	Stitch	0.000578	140	511	AARS,ACP1,GNL3,ADAR,ADA,ABCC3,ADORA2A,ADSL,AHCY,AK2,AK1,APAF1,SLC25A4,SLC25A5,APEX1,APRT,MGAM,ART4,ATIC,AIFM1,BST1,KHSRP,CACNA1E,CASP3,CAT,ENTPD1,MTHFD1L,PTPLAD1,CREBBP,GMPR2,PQBP1,SLC25A15,NAMPT,CYB5A,CS,MAPK14,DDB1,DCK,PTTG1,DNMT1,CYB5R3,SLC29A1,FEN1,FCGRT,CYBASC3,ERCC1,HPSE,RRM2B,GAST,CYB5R4,GK,IRF9,TIMM23,GMPR,GART,YARS2,GAPDH,ABCC4,HRSP12,GCH1,POLQ,NPC2,PAICS,CARM1,HPRT1,HNRNPD,HK1,IL8,IGF2R…
Drug	CID000000784	hydrogen peroxide	Stitch	0.000591	283	1185	ACOX1,ACP1,ACTB,ACTG1,TNFSF10,ACTL6A,ADAR,ADA,TRADD,EDF1,PARP1,ADM,MBD2,AKT1,CFLAR,SOCS2,SLC25A4,APEX1,FAS,AURKB,ART4,ATP1A1,AIFM1,ATP6V0C,ATP6V1A,BAMBI,PRDX5,BARD1,BCL2A1,BCL2L1,PIP5K1B,BLVRA,C2,HIST1H4C,C5AR1,AKR7A2,CBS,CASP1,CASP3,CASP4,CASP8,CAT,EIF3F,SCARB1,SCARB2,DYNLL1,PRKD2,CDK2,CDH2,LRBA,CDC20,KIAA0101,KIAA0247,CHEK1,CCR1,CCR7,TNFSF15,CCS,CLNS1A,TOM1,PARP3,CPD,GLRX5,ABI1,CRK,PHF21A,KLF6,…
Drug	D005001	Ethionine	CTD	0.000686	87	281	CES2,ADD1,ARG1,ATP6V1A,GTF2H5,BTF3,CA2,PTTG1IP,C1QBP,AKR7A2,CASP3,DHRS7B,ISYNA1,AP2M1,COX4I1,CSNK2B,PRDX6,DPYD,ENO1,EIF4A2,EEF1G,SLC27A2,ERP29,RNPS1,PGRMC1,ESD,ETFB,ZWINT,DCXR,COPS4,CEPT1,ST3GAL6,PGCP,GAPDH,GAMT,TMED7,HRSP12,GCHFR,HBB,HDC,H3F3B,HAL,GPX1,GPX4,PAICS,HPRT1,HMGN1,TMEM97,CLPTM1L,CAPRIN1,PCCB,NDUFS5,NME2,MAP2K2,DNAJC3,PGAM1,SLC25A3,SERPINA1,RPL11,RPL13,RPL17,RPL15,RPL3,RPL4,PSMD1,PSMD4…
Drug	D002994	Clofibrate	CTD	0.000797	109	376	CES2,ACADM,ACOX1,ABCC3,ADD1,SLC25A5,APEX1,ARG1,ATP6V1A,GTF2H5,BTF3,CA2,PTTG1IP,C1QBP,AKR7A2,CASP3,CAT,SCARB1,DHRS7B,ISYNA1,AP2M1,COX4I1,CSNK2B,CSNK1D,PRDX6,DPYD,ENO1,EIF4A2,EGR1,EEF1G,HERPUD1,SLC27A2,FASN,CCNI,ERP29,RNPS1,PGRMC1,ESD,ETFB,ZWINT,DCXR,COPS4,CEPT1,ST3GAL6,PGCP,GAPDH,GAMT,TMED7,HRSP12,GCHFR,HBB,HDC,H3F3B,HAL,GPX1,GPX4,PAICS,TGOLN2,HPRT1,HMGN1,TMEM97,CLPTM1L,IFIT3,JUNB,CAPRIN1,STMN1,MP…
Drug	CID000005056	resveratrol	Stitch	0.000886	161	610	FADD,TNFSF10,ADA,ABCC3,PARP1,AKT1,AK1,ALDOC,CFLAR,SOCS2,APAF1,APEX1,BIRC2,FAS,CCNB2,AIFM1,ATP5B,ATP5A1,BID,BCL2A1,BCL2L1,BCL6,BSG,BNIP2,COPS3,CCNA2,RUNX2,CASP1,CASP5,CASP3,CASP4,CASP8,CAT,CD19,BECN1,CCNE1,CDK2,CDK4,CDK6,LYST,SIRT7,TNFSF15,COX7C,COX8A,COX7A2,COX6C,COX5B,COX4I1,KLF6,MAPK14,TP53INP1,DDIT3,STK17B,RPS6KA5,STEAP4,CYP1B1,COX5A,KIF23,GDF15,DYRK1A,DUT,EI24,IER2,EPHA4,ENO1,ENO3,ENO2,EIF4A2…
Drug	D012402	Rotenone	CTD	0.000896	143	528	DPM1,ADAR,ACYP1,PARP1,HERC3,AKT1,FBXL5,PROM1,APAF1,ANPEP,FAS,AIFM1,PIGQ,GALM,ATP5I,ATP5J,RAD54B,ATP5O,BARD1,TBC1D10B,SLC25A20,CASP3,CASP4,CAT,CD34,CD14,BECN1,CDH1,CD68,CHEK1,LYST,CXXC5,CPT1A,COX7C,COX7A2,COL6A3,COX5B,COX4I1,NUP37,NAMPT,RBM12,MAPK14,LRRK2,DDIT3,COX5A,NMT2,EGR1,FASN,FANCE,GRPEL2,ZMYND11,FTH1,WDR6,G6PC,FOS,NIN,GCLC,NDRG1,IRF9,PHF20L1,NDUFAF1,GAPDH,TCIRG1,GCH1,NFAT5,ATP5L,HBB,SPINT2,…
Drug	D002104	Cadmium	CTD	0.001079	78	246	ACOX1,ACP1,TNFSF10,PARP1,AKT1,ALAD,APEX1,BIRC2,TMSB10,AIFM1,BID,GTPBP6,CACNA1E,CCNA2,CASP3,CASP8,CAT,CDK2,CHEK1,PSMD6,CPT1A,MAPK14,DDIT3,PTTG1,EEF1A1,PRDX6,KIF2C,FASN,OS9,ERCC3,RAB11FIP1,FABP5,CHEK2,FTL,G6PC,FOS,GCLC,NDRG1,GATA1,GAPDH,GTF3A,HBB,GPX1,HSPB1,HSP90AA1,CIDEB,HIF1A,IGF2R,HSPE1,LIG1,CACYBP,STMN1,NUDT1,MT2A,MT1A,MT1F,MT1E,MCM2,ALDH6A1,SLC11A2,NUCB2,PRDX1,MYC,NFE2L2,POLB,MAPK3,MAPK1,SERPI…
Drug	D009853	Omeprazole	CTD	0.001179	91	301	CES2,ADD1,ARG1,ATP6V1A,GTF2H5,BTF3,CA2,PTTG1IP,C1QBP,AKR7A2,CASP3,DHRS7B,ISYNA1,AP2M1,COX4I1,CSNK2B,CYP1B1,PRDX6,DPYD,ENO1,EIF4A2,EEF1G,SLC27A2,ERP29,RNPS1,PGRMC1,ESD,ETFB,GAST,ZWINT,DCXR,COPS4,CEPT1,ST3GAL6,PGCP,GAPDH,GAMT,TMED7,HRSP12,GCHFR,HBB,HDC,H3F3B,HAL,GPX1,GPX4,PAICS,HPRT1,HMGN1,TMEM97,CLPTM1L,CAPRIN1,MPO,PCCB,NDUFS5,NME2,MAP2K2,DNAJC3,PGAM1,SLC25A3,SERPINA1,RPL11,RPL13,RPL17,RPL15,RPL3,…
Drug	C017557	nickel subsulfide	CTD	0.001676	18	29	CCNK,ZFP36L1,CASP4,MAPKAPK2,CYP1B1,EGR1,HDGF,GPX1,HSP90AA1,JUP,MYC,RFC4,RPA3,RPS3A,TNFAIP2,TFAP2A,UBC,ZYX
Drug	D010126	Ozone	CTD	0.001721	217	879	SRXN1,ACADM,ACTB,TNFSF10,SIRPA,ACVR1,ADM,ADRA2C,AKT1,ALAS2,ALDOC,PRC1,SOCS3,APEX1,ARF1,ARG1,ARF3,FAS,ARRB2,ATP1A1,CCNB2,ATP2A3,ATP6V0C,CBY1,BPGM,BNIP3L,SAAL1,C5AR1,CCNA2,CASP3,CAT,PRKD2,CD14,CD19,MARCO,CCNE1,CCND3,CDK4,CDC25B,CDC20,CD79A,EVL,CHEK1,CD52,CUTA,MVP,CKS1B,CPT1A,CPD,NUSAP1,CRK,CR2,HNRPDL,CTPS,CTSB,STX6,CSF3R,DDIT3,CYP1B1,KLF4,CD163,DNTT,KIF23,ECE1,CD24,DUSP5,RAB3D,SLC15A4,ENO3,EIF4A2,E…
Drug	C053541	bicalutamide	CTD	0.001923	58	168	MBD2,AKT1,AMD1,PRC1,ATP5I,BARD1,UXT,CCNA2,CASP3,NCOA1,CDH1,LRBA,CDC20,CKS2,NUSAP1,CREBBP,FKBP11,YTHDF3,KIF20A,CCPG1,DKC1,GDF15,ACSL1,STIP1,ZWINT,FOS,SPINT2,IFIT1,MAD2L1,LMNB1,LCN2,LAMP2,MCM2,MME,OSM,PA2G4,PCNA,MYC,MAP2K2,MAPK3,MAPK1,ZMAT3,RACGAP1,RANBP1,PTGS2,PTEN,SMARCA4,FAM129A,TK1,TLR4,TMSB4X,TNF,BTBD3,TPX2,WARS,VDR,TYMS,SHFM1
Drug	D007657	Ketone Bodies	CTD	0.001957	131	480	DPM1,ACADM,ACTB,ACYP1,SNX4,EDF1,SKAP2,ASH2L,SLC25A4,ARF1,ARF3,ATP1A1,ATP5B,ATP5G1,ATP5D,ATP5O,FBXO7,SAMM50,ZFP36L1,BNIP3L,LRP10,ELOVL5,CARS,EIF3F,NCOA1,CNOT10,BECN1,SYF2,EVL,PTDSS1,FAM49B,AP2M1,AP2S1,TSSC4,CTSS,CTSB,MAPK14,ANKRD46,DDX1,FLCN,MAGED1,ECH1,EIF5,ACSL3,ACSL1,RNPS1,BLCAP,FHL2,ZMYND11,DCTN3,ABHD2,RAB31,ZDHHC9,PGCP,FIS1,GZMK,GYG1,ATP5L,RRAGA,CCT2,CXCR3,STXBP5,ARPC1A,PDCD4,CHMP2A,HSP90AB1,…
Drug	D014750	Vincristine	CTD	0.002031	36	86	FADD,AKT1,APAF1,PRC1,CASP1,CASP5,CASP3,CASP4,CASP8,CAT,CES1,FASN,GCLC,GAPDH,GSTP1,ASPM,LMNB1,MEF2A,MYC,PRNP,MAPK1,RPL6,PTGS2,MAP2K4,SLC2A1,TNF,TPI1,QRICH1,AURKA,STAT3,STAT1,STAT2,VDR,TYMS,RBM17,ZNRD1
Drug	C029938	nickel sulfate	CTD	0.002357	97	331	ABCC3,ADORA2A,CFLAR,SOCS3,BIRC2,ATP1B1,PICALM,BID,BCL2A1,ZFP36L1,CA2,C1QB,HERC4,ENTPD1,CD1C,STX11,CDH1,CCR7,CCR6,KLF6,CTPS,CTSB,CTSL1,KLF4,C5orf13,DKC1,RAB8B,ECE1,DUSP5,IER2,ENO1,EGR1,FASN,TOMM34,SUGT1,FGL2,ESD,FABP5,FTH1,FYN,FOS,KRR1,C10orf10,GCLC,CEPT1,GM2A,TRIM22,NET1,DEAF1,HTATIP2,HSPA6,HIVEP1,HIF1A,IL1RN,IL7R,IL8,NPL,KCNJ2,JUNB,MARCKS,MAF,LIG1,LCN2,TLN2,MT2A,MT1F,NUP88,MYH10,NFIL3,NFE2L2,NIN…
Drug	CID000014888	arsenic trioxide	Stitch	0.002373	128	468	TNFSF13,TNFSF12,TNFSF10,ABCC3,PARP1,AKT1,ALDOC,CFLAR,ANPEP,APEX1,BIRC2,FAS,RERE,CCNB2,AIFM1,MTA1,ATP5A1,BCR,PRDX5,BCL2A1,BCL2L1,ZFP36L1,BLVRB,HIST1H4C,BLZF1,CCNA2,KLF11,CASP1,CASP5,CASP3,CASP4,CASP8,CAT,BECN1,CDK2,CDK6,RCBTB2,EVL,ZFYVE16,CHEK1,CEBPE,SERTAD2,CR2,ERGIC2,PLXNC1,MAPK14,CSF2RB,DDIT3,PTTG1,PDLIM7,RPS6KA5,DNMT1,DNTT,CYB5R3,DUT,H2AFY,IER2,CREB5,N4BP1,OS9,SLCO3A1,RNF24,FYB,XRCC6,FOS,PLEKH…
Drug	CID000001690	doxorubicin	Stitch	0.002532	197	788	FADD,TNFRSF10C,TNFSF10,ACTN4,TNFRSF25,TRADD,ABCC3,ADAM19,TOP3B,PARP1,ADM,AHCY,AKT1,PROM1,CFLAR,APAF1,BIRC2,FAS,AIFM1,MTA1,BID,PRDX5,BARD1,BCL2A1,BCL2L1,MYO3B,CA2,HIST1H4C,CAMP,KHSRP,CCNA2,CASP1,CASP5,CASP3,CASP4,CASP8,CAT,PRKD2,CD19,CCNE1,CDK2,CDK6,CDA,KIAA0101,CHEK1,CCR6,MVP,PIK3IP1,COX7C,COX8A,COX7A2,COX6C,HDAC6,COX5B,PHF21A,ABCB6,COX4I1,KLF6,TRIM28,CTSB,CS,MAPK14,TP53INP1,MPZL2,DCK,DDIT3,PTTG1…
Drug	CID000003385	5-fluorouracil	Stitch	0.003417	148	562	CES2,TNFSF13,TNFSF12,TNFSF10,ABCC3,TOP3B,MBD4,AKT1,ALAD,PROM1,CFLAR,CDCA5,APAF1,PRC1,BIRC2,FAS,TMSB10,CCNB2,SLC16A6,GTF2H5,RAD54B,NRIP1,SAMM50,BCL2L1,CAD,CCNA2,CCND2,APOBEC3G,CASP1,CASP3,CASP4,CASP8,EIF3H,CD34,MS4A3,CCNE1,CDK2,CDA,KIAA0101,CHEK1,TRIAP1,CES1,CEACAM3,MVP,KLF6,CTPS,CSTF3,TRAP1,MAPK14,DCK,DDIT3,PTTG1,GDF15,DUT,DUSP6,ERMAP,DPYD,EIF5,EGR1,SAFB2,FEN1,ERCC1,ESRRA,WDR4,RRM2B,IFI6,FOS,ABCC…
Drug	D010269	Paraquat	CTD	0.003685	119	431	ACP1,SIRPA,ACVR1,ADAR,PARP1,ADORA2A,ADRA1D,AES,AKT1,ALAD,APAF1,APEH,APEX1,ARF1,ATP1A1,ATP1B1,BCL2L1,CCND2,CBL,SERPINH1,CASP1,CASP3,CASP8,CAT,DYNLL1,CCND3,CCS,COX7A2,COX5B,COX4I1,NAMPT,CTSB,STX6,MAPK14,LRRK2,CYP1B1,PRDX6,ENO1,ENO2,HERPUD1,ACSL1,OS9,FKBP5,ESRRA,FTH1,FTL,FYN,FOS,GCLC,NDRG1,GOT1,GAPDH,ABCC4,H1F0,GSTP1,HBB,GPX1,GPX4,GRIN1,LSM1,HSPB1,HNRNPD,KCNMB4,IGF2R,HSPE1,KEL,KCNJ15,JUNB,IL15,MPO,M…
Drug	CID000002900	cycloheximide	Stitch	0.003843	221	907	FADD,SNAP23,TNFRSF10C,ACTB,ACTG1,TNFSF10,ACTL6A,B3GALNT1,ABCC3,PARP1,ADRA1D,AHCY,AKT1,ALAS2,CFLAR,SOCS2,AMY2A,AMD1,ANPEP,BIRC2,FAS,RHOB,ART4,CCNB2,ATP6V0C,BCR,BDKRB1,BCL2L1,ZFP36L1,C2,C5AR1,KRT23,HIGD1A,LRP10,CCNA2,RUNX2,CASP1,CASP5,CASP3,CASP4,CASP8,CAT,SCARB2,RPL36,PRKD2,CD14,CD7,CD3D,CCNE1,CDK2,CDK4,CDK6,LRBA,KIAA0101,CEBPE,CCR6,TNFSF15,PARP3,CPA3,CRK,SLC12A6,COL17A1,NAMPT,CTSB,MAPK14,TRIB1,DD…
Drug	CID000005040	rapamycin	Stitch	0.004288	195	784	CCNK,ACTB,ACTG1,TNFSF10,ACTL6A,ACTN4,ACVR1,AKT1,EIF2S2,EIF2B4,CFLAR,SLC7A6,ASH2L,INTS6,SOCS3,BIRC2,SELENBP1,ATIC,CCNB2,AIFM1,BCL2L1,BCL3,MYO3B,DEGS1,MKNK1,CCNA2,CCND2,CBL,CASP1,CASP3,EIF3I,EIF3J,EIF3D,EIF3F,EIF3G,EIF3H,SCARB2,EIF3B,PRKD2,BECN1,CCNF,CCND3,CDK2,CDK4,CDK6,RUVBL1,EIF4EBP3,CD58,EVL,CRK,SCO2,SPG21,FKBP11,CTRL,CS,MAPK14,CSF2RB,TP53INP1,PSMD14,CSF3R,THOC4,RPS6KA5,FLCN,ROCK2,ARID4B,EIF4A1…
Drug	D016604	Aflatoxin B1	CTD	0.004362	52	148	CES2,PHGDH,APEX1,RHOB,TMSB10,CDK4,CDC20,ATP6V1D,PTTG1,DKC1,GDF15,DUT,DUSP6,DPYD,EEF2,EEF1G,FKBP4,GCLC,GSTP1,HDC,GNMT,HSPB1,HSPE1,CXCL10,RPSA,STMN1,MT2A,MT1A,MCM6,ODC1,PCNA,MYC,RPL10A,ZMAT3,RPL6,RPL8,RPL13,RPL17,RPL15,PSMD1,PSMC2,RPS7,RPS4X,RPS3,RPS24,RPS15A,RPS19,TOP2A,TAP1,TYMS,CCT3,PTP4A1
Drug	D005419	Flavonoids	CTD	0.005004	253	1065	LIN7A,ACADM,ACADVL,DLK1,FBXO6,TNFSF10,HRK,ACTN4,ABCC3,PARP1,ADM,ADORA2A,ADRA2C,ADRA1D,AHCY,CDC123,SYNJ1,EIF2B4,ALDOC,AMD1,ANXA6,APAF1,PGLYRP1,BIRC2,ARG1,ARRB2,AURKB,ARNTL,ATP5B,ATP5A1,ATP2A3,PROK2,CBY1,ATP5O,BCR,PRDX5,BARD1,BCL2A1,BCL2L1,KLF9,BSG,BLVRA,CAPN5,NELF,AGPS,CAPN3,SIPA1L1,CACNA1E,SERPINH1,RUNX2,TOR1AIP1,ENTPD1,SCARB1,CD14,CDK4,RUVBL1,CDC20,CD151,CD81,CD79A,EVL,CHEK1,CHRNA5,LTB4R,ATP2C2,…
Drug	D001564	Benzo(a)pyrene	CTD	0.005344	90	306	IER3,FAS,CCNB2,BID,BCL2A1,BCL2L1,BTF3,GFI1B,C5AR1,MADD,CCNA2,CBL,KLF11,CASP3,CASP8,CAT,CDR2,CCR6,TRIM10,KIF20A,MAPK14,CYP1B1,DNASE2,DNMT1,DUT,AATK,ENO1,EGR1,METAP2,MLLT11,ESD,EZH2,PTGES2,FYN,TACC3,GCLC,APOL3,STK25,GYPA,GSTP1,HBA2,HBB,HDAC1,CUGBP2,KLF1,HSPB1,HPRT1,SULT1B1,IL8,IFNAR1,ICAM4,JUND,ITK,ISG20,LTB,LMNB1,LIG1,MPO,MT1A,MST1,MCL1,PRDX1,MYC,MYH10,NFE2L2,NME3,POLE2,MAPK3,MAPK1,NCAPG,PFTK1,PTA…
Drug	D004391	Dust	CTD	0.005551	65	201	RIPK2,IER3,ARF1,BCL2A1,CCNA2,CASP1,CAT,SCARB1,CD14,CCNF,CDK4,CD81,RASSF2,PTDSS1,CRIP1,NAMPT,MAPK14,CYP1B1,DUSP5,EIF4A2,FCAR,CCNI,FCGR1A,FGR,FTH1,FOS,GCLC,TUBA1B,CCT2,PDCD4,HSPA6,HLA-F,HLA-E,HLA-A,IL8,HSPE1,JUND,IRF7,CXCL10,MT2A,MT1A,MT1E,MCL1,CD46,NTHL1,ODC1,SERPINB2,PCNA,NME4,PGAM1,PLAUR,PIM1,RNASE3,PSME2,PTGS2,SLC2A1,RPLP1,RPS15,TMSB4X,TNFRSF1B,TNFRSF1A,TNFAIP2,TNF,TUBG1,CXCR4
Drug	CID000006331	trideuterioborane	Stitch	0.006901	81	269	FADD,TNFSF10,HRK,TNFRSF25,PARP1,AKT1,CFLAR,APAF1,SLC25A4,FAS,AIFM1,BCR,BID,BCKDHB,BCL2A1,BCL2L1,BCL3,BNIP3L,CASP1,CASP5,CASP3,CASP4,CASP8,DYNLL1,BECN1,CCR6,COX8A,HDAC6,SHISA5,SCO2,CTSB,CS,MAPK14,CSF2RB,DNMT1,EI24,METAP2,FOXO3,KRR1,CDC42EP2,CRTAP,APOL6,SH3GLB1,CAMKK2,CDC42EP3,PRMT1,HIF1A,IL7R,IREB2,IL15,RASSF5,BCL2L12,MT1A,MT1E,MYB,DIABLO,MCL1,OPA1,PRDX1,P2RY11,PBX1,MYO5A,C1orf128,NFIL3,NME3,LOC28…
Drug	C016104	sodium bichromate	CTD	0.007905	22	43	CCNK,AKT1,IER3,ATP1A1,ZFP36L1,MAPKAPK2,CYP1B1,IER2,EGR1,HDGF,GPX1,HSP90AA1,MARCKSL1,MYC,PLAUR,SERPINA1,RFC4,SLC2A1,RPS3A,YWHAH,UBC,ZYX
Drug	CID000004813	piceatannol	Stitch	0.0084	64	199	ACP1,AKT1,ATP5B,ATP5A1,CBL,CASP3,PRKD2,CD53,MAPK14,CYP1B1,EPB41,FCGR3B,FCGR3A,FCGR2A,FGR,COPS8,FYN,FOS,HCK,IFI44,HSPB1,SULT1B1,IL4R,IFNAR2,IFNAR1,JAK2,ITK,ITGB1,ITGB2,ITGAM,INSL3,CXCL10,LCP2,RPSA,LAT,SLC5A8,MATK,CLEC7A,OSM,P2RY12,MAP2K2,MAP2K3,MAPK13,MAPK3,MAPK1,PRKCH,PRKCD,PLEK,PIK3C2B,PIK3R2,PI3,RAF1,PTK2,SELPLG,MAP2K4,SLA,S100A9,TNF,SSFA2,STAT3,STAT1,STAT2,ZAP70,VAV1
Drug	CID000025500	nickel hydroxide	Stitch	0.010963	78	259	IL18R1,FADD,TNFSF14,TNFSF13,TNFSF12,RIPK2,TRADD,AP2B1,BCL10,AKT1,CFLAR,APAF1,BIRC2,CKAP2,FAS,RHOB,C21orf33,BCL2A1,BCL2L1,FMNL1,CASP3,CASP8,CD27,CD14,CRK,MAPK14,MAPKAPK2,MAP4K4,EPHB1,COPS8,RIPK3,MAP3K7IP1,NOD1,MAP3K2,TNFSF13B,IL1F7,IL8,HSPE1,LTB,LTA,LTBR,MAP3K3,MAP3K5,MAP3K11,MYD88,MYC,PELI1,PELI2,NASP,NEDD9,MAP2K2,MAP2K3,MAPK13,PKN2,MAPK7,MAPK3,MAPK1,PRKCD,FAM48A,PI3,TBK1,PTGS2,PTPRC,MAP2K4,STIL,…
Drug	C494620	CPS 11	CTD	0.010988	8	8	PARP1,AKT1,CASP8,MAPK14,MCL1,MAPK3,MAPK1,STAT3
Drug	C519885	WP1066	CTD	0.010988	8	8	PARP1,AKT1,CASP3,JAK2,MAPK3,MAPK1,STAT3,STAT5B
Drug	C111237	vorinostat	CTD	0.013047	38	99	TNFSF10,PARP1,AKT1,CFLAR,ANXA6,BIRC2,AIFM1,ATP1B1,BID,BCL2A1,BCL2L1,CASP3,CASP8,CDH1,HDAC6,CREBBP,MAPK14,CYP1B1,ENO2,FHL2,FOXO1,IFI30,H1F0,HDAC1,HSPB1,DIABLO,MYC,MAPK3,MAPK1,PDE4B,PML,RARA,RAF1,TNF,TCEA2,SVIL,SP100,TYMS
Drug	CID000002019	ActD	Stitch	0.015999	137	525	FADD,TNFRSF10C,ACTB,ACTG1,TNFSF10,ACTL6A,GNL3,B3GALNT1,TRADD,ABCC3,TOP3B,PARP1,ADM,AKT1,IER3,CFLAR,AMD1,BIRC2,FAS,RHOB,BCR,BDKRB1,BCL2L1,CA2,CA1,HIST1H4C,KRT23,CASP1,CASP3,CASP8,CAT,LRBA,OASL,CD79A,CCR6,SHISA5,SLC12A6,HNRPDL,MAPK14,DDIT3,CYP1B1,POLR1C,H2AFY,EIF4G1,EGR1,FCGR2A,ERCC3,FBL,FOS,GATA1,GAPDH,H1F0,GYPC,HBQ1,HBG2,HBZ,HBA2,HBB,HBG1,HBE1,HDC,H3F3B,H3F3A,IFI44,GRB2,IL1F7,HNRNPD,IL4R,IL8,IFIT…
Drug	D010882	Piperonyl Butoxide	CTD	0.016265	47	134	ABCC3,PHGDH,APEX1,CDK4,CDC20,PTTG1,DKC1,GDF15,DUT,DUSP6,DPYD,EEF2,EEF1G,FKBP4,GCLC,GSTP1,HDC,HSPB1,HSPE1,CXCL10,RPSA,STMN1,MT2A,MT1A,MCM6,ODC1,PCNA,MYC,RPL10A,ZMAT3,RPL6,RPL8,RPL13,RPL17,RPL15,PSMD1,PSMC2,RPS7,RPS4X,RPS3,RPS24,RPS15A,RPS19,TOP2A,TYMS,CCT3,PTP4A1
Drug	CID000000888	magnesium	Stitch	0.018255	303	1329	DPM1,RPL10L,ERAL1,TRPM6,AARS,ACP1,TP53RK,ACTB,ACTG1,ACTL6A,ACTN4,GNL3,TOP3B,AP2B1,AK2,AK1,ALAD,PAPSS2,ANPEP,SLC25A4,SLC25A5,APEX1,ARF1,ARF3,APRT,MGAM,ARSA,ARHGDIB,CTDP1,ATP1A1,AIFM1,ATP5B,ATP5A1,ATP2A3,ATP5D,ATP6V1A,ATP5O,BAMBI,GTPBP6,BCKDHB,MYL6B,HIST1H2AC,CA2,CA1,C2,REXO2,CAD,YARS,CCNA2,CBL,RAB11FIP5,CASP1,CAT,ENTPD1,DYNLL1,PRKD2,MTHFD1L,MARCO,CDK2,CDH1,LRBA,KIAA0101,ATP2C2,COX7C,COX6C,ALKBH2,M…
Drug	D003520	Cyclophosphamide	CTD	0.019019	89	310	ACTB,PARP1,ADM,APEX1,ARG1,FAS,AURKB,BUB3,BDKRB1,BCL2L1,BSG,CA2,CST7,CASP1,CASP3,CAT,BRP44,MS4A3,CD14,BECN1,CDH2,CDH1,CDC20,CD79B,MELK,COX7A2,MAPK14,DDIT3,CYP1B1,MAGED1,E2F3,EEF2,FAU,STIP1,ERCC1,F2RL1,FYN,FOS,FPR2,GAMT,GALC,GSTP1,IGF2BP3,RRAGA,CCT7,GPX4,HSPB1,HSP90AB1,HSP90AA1,HPRT1,HIF1A,IL1RN,IFIT2,HSPE1,ILF3,MARCKS,LDHB,LCN2,MPO,MXI1,MX2,MFGE8,ODC1,OSM,PCNA,MYH10,SNX10,NAIP,NME1,MAPK1,NFKBIZ,RP…
Drug	CID000004156	methyl methanesulfonate	Stitch	0.02185	101	364	ADA,PARP1,APEX1,RHOB,RAD54B,CDC45L,BARD1,ASF1A,BLVRB,OSGIN2,CASP3,CAT,SCARB1,SCARB2,PRKD2,CDK2,CHEK1,CEBPE,MAFB,PARP3,CRK,RDM1,SAE1,MAPK14,CSNK1D,DDB1,DDIT3,DNMT1,DUT,BRE,ENO1,ENO3,ENO2,HERPUD1,FANCE,FEN1,ZNF350,ERCC1,ERCC3,PGRMC1,ESD,RRM2B,CHEK2,RMI1,XRCC6,FOS,KRR1,DCXR,POLR1D,DLEU1,MSH6,POLQ,HBZ,HBB,SMC2,PAICS,HPRT1,HNRNPD,PRPF19,KPNB1,IMPA2,CNOT6,LIG1,MUTYH,MCM2,FOXO4,NTHL1,PCNA,GADD45B,POLE,P…
Drug	CID000001744	fenretinide	Stitch	0.022479	80	272	ACADVL,TNFSF10,TRADD,PARP1,AKT1,ALDOC,CFLAR,ANPEP,BIRC2,NRIP1,BARD1,BCL2A1,BCL2L1,C1QBP,DEGS1,CCNA2,RUNX2,CASP3,CASP8,CD34,DYNLL1,BECN1,CDK4,CD58,TRIM33,COX7C,COX8A,COX7A2,COX6C,LASS6,COX5B,COX4I1,MAPK14,DDIT3,PTTG1,CYP26A1,COX5A,GDF15,C16orf53,ELAVL3,HERPUD1,FKBP4,ERCC1,PGRMC1,C10orf10,LILRB2,GRB2,SPTLC1,HMMR,HINT1,IL1RN,IL4R,IFIT3,OPLAH,LCN2,DIABLO,NUCB2,SERPINB2,PCNA,MYC,GADD45B,NCF2,TRAK2,NON…
Drug	C496197	trans-10,cis-12-conjugated linoleic acid	CTD	0.026848	53	160	ACOX1,PRC1,RHOB,BID,NCK2,HIRIP3,CASP3,CDK2,CDK4,CDC25B,CENPA,CENPE,CENPF,CPT1A,CRIP1,SMC4,KLF4,DUSP6,KIF2C,FASN,FEN1,EZH2,FOXO1,PLK4,MSH6,POLQ,TP53INP2,ASPM,HMGA1,KIF11,ISG20,MXD1,MXI1,MCM4,MCM2,MCM7,RETN,KIF15,MYC,NASP,POLE2,MAP2K3,SESN3,UHRF1,SLC22A4,SKP2,TK1,TNF,TOP2A,YWHAH,TPX2,VDR,UCP2
Drug	C022838	nickel chloride	CTD	0.027752	41	113	TNFSF10,PARP1,ADM,ARRB2,CCNB2,HIST1H4C,CASP3,CCR7,CKS2,KLF6,MAPK14,TRIB1,DDIT3,PTTG1,CYP1B1,IER2,ACSL1,F5,UBE2C,GCLC,GAPDH,HIF1A,JUNB,LSS,ST6GALNAC4,MDH2,NUCB2,NFE2L2,PGK1,PLAGL1,RACGAP1,PTK2,SFRS2,SLC2A1,MAFF,EGLN1,TPI1,VIPR1,TXNRD1,TUFT1,TUBA1A
Drug	D004128	Dimethylnitrosamine	CTD	0.032652	105	385	CES2,TNFSF10,ABCC3,PHGDH,PROM1,APEX1,BUB3,RHOB,TMSB10,ATP5G1,BCL2L1,BLVRB,CCNA2,SERPINH1,HACL1,CDK4,CDK6,CDC20,CD68,CES1,CETN2,SLC12A6,KLF6,ATP6V1D,CSAD,CTSS,TRIB1,PTTG1,DKC1,CYB5R3,GDF15,DUT,DUSP6,IER2,DPYD,ENO2,EEF2,EEF1G,ACSL1,FKBP4,F5,GAST,SLC37A4,GCLC,GOT1,HDC,SQRDL,GNMT,HSPB1,CIDEB,HMGA1,HSPE1,IRF1,CXCL10,LSS,LEP,LCN2,RPSA,STMN1,MT2A,MT1A,MCM6,NUCB2,ODC1,PCNA,PC,MYC,RPL10A,MAPK3,MAPK1,PRKCH…
Drug	D005047	Etoposide	CTD	0.037448	82	284	ACADM,TNFSF10,ABCC3,PARP1,AKT1,PHGDH,ALDOC,CFLAR,PRC1,BIRC2,ATP1A1,SLC16A6,NRIP1,BAMBI,BCL2L1,PIP5K1B,NCK2,CCNA2,CASP3,CDK2,CHEK1,DDIT3,NMT2,EI24,FASN,ACSL3,MLLT11,ETV6,F2R,FYN,FOXO1,FOXO3,UBE2C,GCLC,HMG20B,GSTP1,ST6GALNAC2,HTATIP2,TMEM97,IL8,ISG20,STMN1,MPO,MXI1,MBP,MAP3K5,MCL1,PRDX1,NEDD9,UBL3,PRNP,MAP2K3,RAB20,PDE4B,CD274,BIN3,RPL6,TRIB2,PTEN,FAM129A,XAF1,TMSB4X,TNF,TOP2A,TOP2B,PRDX2,TFAP2A,TF…
Drug	CID000000253	d-biotin	Stitch	0.038888	56	174	RPL10L,ACTB,PARP1,SERBP1,SLC5A6,ANXA11,FAS,ART4,BCL2L1,PTTG1IP,C1QBP,CASP1,CASP3,CASP8,CD34,CD3D,CD68,DNTT,VPS4B,DUT,PRDX6,FASN,FLNB,IFI30,GOT2,HMMR,HLA-A,ITGB1,TMEM49,LMNB1,LCN2,MPO,MDH2,MCCC1,PCNA,PCCB,PC,NHP2L1,PECAM1,ATAD2,RPL9,RPL8,RPL15,RPL19,RPL3,RPL4,RIT1,ALDH18A1,SLC19A1,RPL37A,RPLP0,RPS29,TGM2,TFRC,LMNB2,NUP205
Drug	D006581	Hexachlorobenzene	CTD	0.041323	47	138	AKT1,ALAS2,ALAD,SOCS2,SOCS3,PGLYRP1,C1QB,CASP1,CASP8,CAT,CD14,CD247,CD3D,CDH1,CD52,CCBP2,CPA3,MAPK14,CSF2RB,CYP1B1,CD24,FCGRT,FOS,GAPDH,IGSF6,GSTP1,HDC,GSK3B,HMBS,HSPE1,IRF1,CXCL10,IL15,LCN2,MT1A,ORM1,PPOX,SOD1,S100A9,S100A8,TIMP2,TNFRSF1A,PRDX2,TFRC,STAT1,UROD,CXCR4
Drug	C024352	fludarabine	CTD	0.041756	17	31	AKT1,FAS,AIFM1,CCNA2,CASP3,CASP8,CCNE1,GDF15,HIF1A,DIABLO,MCL1,PCNA,MAP2K2,MAPK3,MAPK1,ZMAT3,STAT1
Drug	CID000004792	phorbol ester	Stitch	0.045965	315	1403	CES2,IQGAP1,FADD,DLK1,ACP1,ACTB,ACTG1,ACTL6A,TRADD,EDF1,ADAM19,TOP3B,ADORA2A,CACNA1I,BCL10,CACNA1H,AKT1,VNN2,IER3,CFLAR,ANK1,ANPEP,BIRC2,ARF3,FAS,ARHGDIB,ART4,BDKRB1,BCL2A1,BCL2L1,BSG,ZFP36L1,MYL6B,HIST1H4C,C5AR1,KRT23,AKR7A2,CACNA1E,CCNA2,CCND2,RUNX2,CASP3,CASP8,CAT,EIF3J,SCARB1,SCARB2,PRKD2,CD14,CD19,CD7,CD3D,STX10,STX11,CDK2,CDK4,CDH1,LRBA,CD97,CD72,CD79B,CD79A,CD58,KIAA0101,MBOAT7,TH1L,GAB2,C…
GENE ONTOLOGY CATEGORIES
GO: Molecular Function	GO:0003735	structural constituent of ribosome		0	91	162	RPL10L,RSL1D1,MRPL52,RPL36,MRPS33,MRPL51,MRPL37,MRPL27,MRPL35,MRPS17,MRPL24,FAU,RPL35,MRPS2,MRPS16,RPSA,RPL7L1,MRPS22,RPL10A,MRPL14,MRPS24,MRPL11,MRPS5,MRPL41,MRPS15,MRPS11,MRPS9,MRPL22,RPL6,RPL9,RPL8,RPL11,RPL13,RPL12,RPL17,RPL15,RPL18,RPL19,RPL18A,RPL3,RPL4,RPL5,MRPL17,RPS6,RPS5,RPS9,RPS7,RPS12,RPS13,RPS10,RPS11,RPLP1,MRPS12,MRPL12,RPLP2,RPS2,RPS4X,RPS3A,RPS3,RPL31,RPL32,RPL34,RPL35A,RPL37A,RPL…
GO: Molecular Function	GO:0003723	RNA binding		0	214	766	ERAL1,AARS,ADAR,RSL1D1,MBD2,SERBP1,SYNJ1,EIF2S2,LSM4,BARD1,ZFP36L1,CSDA,YARS,THOC5,KHSRP,APOBEC3G,CARS,EIF3G,EIF3B,OASL,DHX58,LSM7,CPSF3,KIAA0020,DDX47,HNRPDL,TLR7,RDM1,TLR8,CSTF3,LRPPRC,RBM12,MRPS17,THOC4,DDX10,DDX1,NSUN7,DKC1,QKI,FXR2,ELAVL3,EIF4A1,EIF4A2,EIF4G1,SAFB2,LGTN,DHX34,FAU,FECH,PUS1,HNRNPA0,SFRS2B,RNPS1,CPSF4,EPRS,FBL,EWSR1,THOC7,RPL35,KRR1,EMG1,RBM14,ASCC1,SMNDC1,GTF3A,IGF2BP3,IGF2BP…
GO: Molecular Function	GO:0016874	ligase activity		4.3e-05	110	419	FBXO4,AARS,TSPAN17,FBXO6,TTLL3,HERC1,HERC3,FBXL5,FBXL3,FBXO7,BARD1,CAD,YARS,KHSRP,PIAS1,CBL,CARS,HERC4,CDC23,MTHFD1L,CDC34,UBE2F,UFC1,ANAPC11,LARS,TRIM33,RBX1,ACSL5,SAE1,CTPS,RCL1,TOPORS,UBE2L6,DARS,PPCS,RNF14,CARS2,SLC27A2,ACSL3,ACSL1,ACSL4,EPRS,WWP2,UBE2C,CBLL1,GCLC,NOSIP,GART,GARS,YARS2,AARSD1,TRIM22,UBE4B,FARS2,HAL,MTHFS,PAICS,PRPF19,IFNAR1,IARS,RNF19B,LIG1,HECW2,CTPS2,MARS,DTX3L,MCCC1,PCCB,P…
GO: Molecular Function	GO:0005198	structural molecule activity		4.9e-05	153	635	RPL10L,KLHL3,ACTB,ACTG1,CTNNAL1,ADD1,RSL1D1,LDLRAP1,MRPL52,CLDN9,ANK1,ASPH,MYL6B,NCK2,KRT23,EIF3B,RPL36,MRPS33,MRPL51,MRPL37,MRPL27,COL4A5,MRPL35,CSTA,MRPS17,AKAP7,ROCK2,EPB41,EPB42,NUP155,MRPL24,FAU,FBLN2,ERV3,DCTN3,AKAP13,RPL35,TUBA1B,MRPS2,MRPS16,MOSPD2,JUP,ISCA1,TUBB,LMNB1,LAMC1,LAMA5,RPSA,KRT1,KRT10,TLN2,ROPN1B,MYBPC3,MUC6,MBP,RPL7L1,CLDN23,MRPS22,ODF2,CDC42SE2,MYL6,MYL4,RPL10A,MRPL14,MRPS24…
GO: Molecular Function	GO:0045182	translation regulator activity		0.000769	47	144	ABCF1,EIF2S2,EIF2B4,EIF3I,EIF3J,EIF3D,EIF3F,EIF3G,EIF3H,EIF3B,EIF4EBP3,MRPL37,MRPL35,EEF1A1,EIF4A1,EIF4A2,EIF4G1,EIF5,EIF2B1,EEF2,LGTN,EEF1G,EEF1B2,ABTB1,IGF2BP3,IGF2BP2,GSPT1,EIF2C2,EIF3K,IREB2,EIF3E,PABPC1,EIF2AK1,EEF2K,MRPL11,EIF2AK2,RARA,DHX29,MTRF1L,RPS9,GSPT2,RPS14,EIF2C4,TCEA2,TCEB3,EIF4E3,ELL
GO: Biological Process	GO:0006412	translation		0	173	434	RPL10L,AARS,ABCF1,RSL1D1,AKT1,EIF2S2,EIF2B4,MRPL52,BCL3,ZFP36L1,NCK2,YARS,KHSRP,MKNK1,CARS,EIF3I,EIF3J,EIF3D,EIF3F,EIF3G,EIF3H,EIF3B,RPL36,CDK4,EIF4EBP3,LARS,MRPS33,MRPL51,MRPL37,MRPL27,MRPL35,MRPS17,DDX1,DARS,DHPS,QKI,EEF1A1,EIF4A1,EIF4A2,EIF4G1,EIF5,EIF2B1,EEF2,LGTN,EEF1G,CARS2,MRPL24,EEF1B2,FAU,FECH,ABTB1,EPRS,RPL35,PRG3,MRPS2,NDUFA13,GARS,YARS2,AARSD1,MRPS16,HRSP12,IGF2BP3,IGF2BP2,FARS2,GSPT1…
GO: Biological Process	GO:0006414	translational elongation		0	68	109	RPL36,EEF1A1,EEF2,EEF1G,EEF1B2,FAU,RPL35,RPSA,EEF2K,RPL10A,RPL6,RPL9,RPL8,RPL11,RPL13,RPL12,RPL17,RPL15,RPL18,RPL19,RPL18A,RPL3,RPL4,RPL5,RPS6,RPS5,RPS9,RPS7,RPS12,RPS13,RPS10,RPS11,RPLP1,RPLP2,RPS2,RPS4X,RPS3A,RPS3,RPL31,RPL32,RPL34,RPL35A,RPL37A,RPL38,RPL39,RPL41,RPLP0,RPL23A,RPL22,RPL24,RPL27,RPL26,RPL27A,RPL30,RPS24,RPS25,RPS20,RPS27,RPS27A,RPS29,RPS15,RPS14,RPS15A,RPS19,RPS18,RPS16,RPS17,UBA…
GO: Biological Process	GO:0002376	immune system process		0	342	1258	IL18R1,PLDN,TNFSF14,TNFSF13,TNFSF12,TNFSF10,RIPK2,ADA,ADD1,ADORA2A,SKAP2,AP2B1,AHCY,BCL10,AKT1,ALAS2,ANK1,ASH2L,ANXA11,PGLYRP1,FAS,ARRB2,FAIM3,ARHGDIB,CCNB2,DNAJA3,AZU1,PICALM,BDKRB1,BCL2A1,BCL3,BCL6,BST2,BST1,DYRK3,BPGM,NCK2,BNIP3L,CA2,C1QB,C2,C1QBP,C5AR1,CST7,THOC5,GPR65,APOBEC3G,KLF11,SEMA7A,CASP1,CASP3,CASP8,CD34,CD27,CD14,CD19,CD7,CD247,AHCTF1,CD3D,CD1C,MARCO,CCND3,CDK6,OASL,CD97,SKAP1,CD81,…
GO: Biological Process	GO:0007049	cell cycle		0	277	1099	CCNK,FBXO6,ACVR1,TIMELESS,BCL10,AKT1,CDC123,AK1,CDC16,PHGDH,NAE1,BIN1,CDCA5,ANXA11,PRC1,APEX1,CKAP2,AURKB,BUB3,RHOB,CCNB2,RAD54B,CDC45L,AXIN2,BCR,BARD1,ANAPC13,BCL6,GFI1B,OSGIN2,CAMK2G,MADD,CCNA2,CCND2,CUL4A,CASP3,CDC23,AHCTF1,CCNF,CCNE1,CCND3,CDK2,CDK4,CDK6,RUVBL1,CDC25B,CDC34,CDC20,RASSF2,CHEK1,TRIAP1,KNTC1,CDKN2D,ZC3HC1,ANAPC11,SIRT7,CETN2,CENPA,CKAP5,CENPE,CENPF,PSMD6,CKS1B,CKS2,MAFB,NUSAP1,H…
GO: Biological Process	GO:0051707	response to other organism		0	120	375	RIPK2,ADM,AP2B1,BCL10,SOCS3,PGLYRP1,AZU1,BDKRB1,BCL3,BST2,BNIP3L,HIST1H2BC,C5AR1,CAMP,APOBEC3G,CASP1,SCARB1,CD14,BECN1,CDK6,LYST,CEBPE,CCR1,AP2M1,AP2S1,TLR7,TLR8,UNC13D,CTSG,MAPK14,TRIB1,DEFA4,DEFA3,DEFA1,IL27RA,CD24,ENO1,ISG15,EEF1G,FCGR1A,FGR,LILRB1,F2R,FOS,NOD1,IRF9,TLR6,TRIM22,GCH1,HCK,IFI44,NPC2,GPX1,POLR3C,NLRC4,HSPB1,HLA-G,IL6R,RBPJ,IFI16,IFI35,SP110,IFNAR2,IFNAR1,IRF7,ISG20,IL15,LTA,LCN2,…
GO: Biological Process	GO:0006955	immune response		0	218	832	IL18R1,TNFSF14,TNFSF13,TNFSF12,TNFSF10,RIPK2,ADA,AP2B1,AHCY,BCL10,ANXA11,PGLYRP1,FAS,ARRB2,FAIM3,ARHGDIB,BCL3,BCL6,BST2,BST1,BNIP3L,C1QB,C2,C1QBP,C5AR1,CST7,GPR65,APOBEC3G,SEMA7A,CD27,CD14,CD19,CD7,CD247,CD1C,MARCO,OASL,CD97,SKAP1,CD79B,CD79A,LYST,DHX58,GAB2,LILRA6,CENPF,CCR2,CCR1,CCR7,CCBP2,CCR6,LTB4R,TNFSF15,AP2M1,AP2S1,CR2,MGC29506,CR1,TLR7,C1RL,COL4A3BP,SPG21,IL18BP,TLR8,UNC13D,CTSS,CTSG,AIM2…
GO: Biological Process	GO:0006915	apoptosis		0	303	1265	AARS,ABR,FADD,TNFRSF10C,TNFSF14,TNFSF12,TNFSF10,HRK,ACTN4,RIPK2,ACVR1,ADAR,ADA,TNFRSF25,TRADD,MBD4,ADM,ADORA2A,BCL10,SERBP1,AKT1,ARHGEF7,IER3,TAX1BP1,NAE1,ALDOC,CFLAR,SOCS2,APAF1,SOCS3,PGLYRP1,BIRC2,CKAP2,FAS,ARRB2,FAIM3,RHOB,AIFM1,DNAJA3,PROK2,AZU1,BID,PRDX5,BARD1,BCL2A1,BCL2L1,BCL3,BCL6,BNIP3L,BNIP2,NSMAF,C5AR1,CSDA,MADD,YARS,GPR65,CUL4A,KLF11,CASP1,CASP5,CASP3,CASP4,CASP8,CAT,SCARB1,DYNLL1,CD2…
GO: Biological Process	GO:0051704	multi-organism process		0	215	824	FADD,RIPK2,ADA,RNGTT,ADM,AP2B1,BCL10,CFLAR,BIN1,ANPEP,SLC25A4,SLC25A5,SOCS3,PGLYRP1,AZU1,ATP6V0C,BDKRB1,BCL3,KLF9,BST2,BSG,BNIP3L,HIST1H2BC,BYSL,C1QBP,C5AR1,CAMP,THOC5,APOBEC3G,CASP1,SCARB1,CD14,CD247,BECN1,CDK6,CD81,LYST,CEBPE,CENPA,CCR2,CCR1,AP2M1,AP2S1,CREBBP,TLR7,PHF21A,TLR8,UNC13D,CTSG,MAPK14,TRIB1,THOC4,DDB1,DEFA4,DEFA3,DEFA1,IL27RA,CD24,ENO1,ISG15,EIF4A2,EIF4G1,EEF1G,ACSL4,FCGRT,FCGR1A,FGR…
GO: Biological Process	GO:0012501	programmed cell death		0	305	1279	AARS,ABR,FADD,TNFRSF10C,TNFSF14,TNFSF12,TNFSF10,HRK,ACTN4,RIPK2,ACVR1,ADAR,ADA,TNFRSF25,TRADD,MBD4,ADM,ADORA2A,BCL10,SERBP1,AKT1,ARHGEF7,IER3,TAX1BP1,NAE1,ALDOC,CFLAR,SOCS2,APAF1,SOCS3,PGLYRP1,BIRC2,CKAP2,FAS,ARRB2,FAIM3,RHOB,AIFM1,DNAJA3,PROK2,AZU1,BID,PRDX5,BARD1,BCL2A1,BCL2L1,BCL3,BCL6,BNIP3L,BNIP2,NSMAF,C5AR1,CSDA,MADD,YARS,GPR65,CUL4A,KLF11,CASP1,CASP5,CASP3,CASP4,CASP8,CAT,SCARB1,DYNLL1,CD2…
GO: Biological Process	GO:0016265	death		0	326	1390	AARS,ABR,FADD,TNFRSF10C,TNFSF14,TNFSF12,TNFSF10,HRK,ACTN4,RIPK2,ACVR1,ADAR,ADA,TNFRSF25,TRADD,PARP4,MBD4,ADM,ADORA2A,BCL10,SERBP1,AKT1,ARHGEF7,IER3,TAX1BP1,NAE1,ALDOC,CFLAR,SOCS2,APAF1,SLC25A4,SOCS3,PGLYRP1,BIRC2,BSCL2,CKAP2,FAS,ARRB2,FAIM3,RHOB,AIFM1,DNAJA3,PROK2,AZU1,AXIN2,ATXN10,BID,PRDX5,BARD1,BCL2A1,BCL2L1,BCL3,BCL6,BNIP3L,BNIP2,NSMAF,C5AR1,CSDA,MADD,YARS,GPR65,CUL4A,KLF11,CASP1,CASP5,CASP3,…
GO: Biological Process	GO:0008219	cell death		0	325	1385	AARS,ABR,FADD,TNFRSF10C,TNFSF14,TNFSF12,TNFSF10,HRK,ACTN4,RIPK2,ACVR1,ADAR,ADA,TNFRSF25,TRADD,PARP4,MBD4,ADM,ADORA2A,BCL10,SERBP1,AKT1,ARHGEF7,IER3,TAX1BP1,NAE1,ALDOC,CFLAR,SOCS2,APAF1,SLC25A4,SOCS3,PGLYRP1,BIRC2,BSCL2,CKAP2,FAS,ARRB2,FAIM3,RHOB,AIFM1,DNAJA3,PROK2,AZU1,AXIN2,ATXN10,BID,PRDX5,BARD1,BCL2A1,BCL2L1,BCL3,BCL6,BNIP3L,BNIP2,NSMAF,C5AR1,CSDA,MADD,YARS,GPR65,CUL4A,KLF11,CASP1,CASP5,CASP3,…
GO: Biological Process	GO:0010941	regulation of cell death		0	250	1017	AARS,ABR,FADD,TNFSF14,TNFSF12,TNFSF10,HRK,ACTN4,RIPK2,ACVR1,ADAR,ADA,TNFRSF25,TRADD,MBD4,ADM,ADORA2A,BCL10,SERBP1,AKT1,ARHGEF7,IER3,TAX1BP1,NAE1,CFLAR,SOCS2,APAF1,SLC25A4,SOCS3,BIRC2,FAS,ARRB2,FAIM3,AIFM1,DNAJA3,PROK2,AZU1,BID,PRDX5,BARD1,BCL2A1,BCL2L1,BCL3,BCL6,BNIP3L,BNIP2,NSMAF,C5AR1,CSDA,MADD,CUL4A,CASP1,CASP5,CASP3,CASP4,CASP8,CAT,DYNLL1,CD27,BECN1,CDK4,CDH1,BCLAF1,LYST,TRIAP1,CDKN2D,ZC3HC1,…
GO: Biological Process	GO:0043067	regulation of programmed cell death		0	247	1006	AARS,ABR,FADD,TNFSF14,TNFSF12,TNFSF10,HRK,ACTN4,RIPK2,ACVR1,ADAR,ADA,TNFRSF25,TRADD,MBD4,ADM,ADORA2A,BCL10,SERBP1,AKT1,ARHGEF7,IER3,TAX1BP1,NAE1,CFLAR,SOCS2,APAF1,SOCS3,BIRC2,FAS,ARRB2,FAIM3,AIFM1,DNAJA3,PROK2,AZU1,BID,PRDX5,BARD1,BCL2A1,BCL2L1,BCL3,BCL6,BNIP3L,BNIP2,NSMAF,C5AR1,CSDA,MADD,CUL4A,CASP1,CASP5,CASP3,CASP4,CASP8,CAT,DYNLL1,CD27,BECN1,CDK4,CDH1,BCLAF1,LYST,TRIAP1,CDKN2D,ZC3HC1,ARHGEF11…
GO: Biological Process	GO:0042981	regulation of apoptosis		0	244	994	AARS,ABR,FADD,TNFSF14,TNFSF12,TNFSF10,HRK,ACTN4,RIPK2,ACVR1,ADAR,ADA,TNFRSF25,TRADD,MBD4,ADM,ADORA2A,BCL10,SERBP1,AKT1,ARHGEF7,IER3,TAX1BP1,NAE1,CFLAR,SOCS2,APAF1,SOCS3,BIRC2,FAS,ARRB2,FAIM3,AIFM1,DNAJA3,PROK2,AZU1,BID,PRDX5,BARD1,BCL2A1,BCL2L1,BCL3,BCL6,BNIP3L,BNIP2,NSMAF,C5AR1,CSDA,MADD,CUL4A,CASP1,CASP5,CASP3,CASP4,CASP8,CAT,DYNLL1,CD27,BECN1,CDK4,CDH1,BCLAF1,LYST,TRIAP1,CDKN2D,ZC3HC1,ARHGEF11…
GO: Biological Process	GO:0043068	positive regulation of programmed cell death		0	147	520	ABR,FADD,TNFSF14,TNFSF12,TNFSF10,HRK,RIPK2,TNFRSF25,TRADD,MBD4,ADORA2A,BCL10,AKT1,ARHGEF7,NAE1,CFLAR,APAF1,FAS,ARRB2,AIFM1,BID,BARD1,BCL2L1,BCL3,BCL6,BNIP3L,NSMAF,CUL4A,CASP1,CASP3,CASP4,CASP8,DYNLL1,CD27,CDK4,BCLAF1,LYST,ARHGEF11,FGD4,HDAC6,SHISA5,UNC13D,TP53INP1,LRRK2,DDIT3,STK17B,MAGED1,CD24,DUSP6,EI24,FCGR1A,FCGR2A,ERCC3,RRM2B,AKAP13,CHEK2,FOXO3,RIPK3,NOD1,SH3GLB1,NDUFA13,GCH1,NET1,SMNDC1,MSH…
GO: Biological Process	GO:0009607	response to biotic stimulus		0	141	493	AARS,FBXO6,RIPK2,ADM,AP2B1,BCL10,SOCS3,PGLYRP1,AZU1,BDKRB1,BCL3,BST2,BNIP3L,HIST1H2BC,C5AR1,CAMP,SERPINH1,APOBEC3G,CASP1,SCARB1,CD14,BECN1,CDK6,LYST,CEBPE,CCR1,AP2M1,AP2S1,HDAC6,TLR7,TLR8,UNC13D,CTSG,MAPK14,TRIB1,DDIT3,DEFA4,DEFA3,DEFA1,IL27RA,CD24,ENO1,ISG15,EEF1G,HERPUD1,FCGR1A,FGR,LILRB1,F12,F2R,FOS,NOD1,IRF9,TLR6,DERL2,TRIM22,GCH1,HCK,IFI44,NPC2,GPX1,POLR3C,GSK3B,NLRC4,HSPB1,HSP90AB1,HSP90AA1…
GO: Biological Process	GO:0043065	positive regulation of apoptosis		0	146	517	ABR,FADD,TNFSF14,TNFSF12,TNFSF10,HRK,RIPK2,TNFRSF25,TRADD,MBD4,ADORA2A,BCL10,AKT1,ARHGEF7,NAE1,CFLAR,APAF1,FAS,ARRB2,AIFM1,BID,BARD1,BCL2L1,BCL3,BCL6,BNIP3L,NSMAF,CUL4A,CASP1,CASP3,CASP4,CASP8,DYNLL1,CD27,CDK4,BCLAF1,LYST,ARHGEF11,FGD4,HDAC6,SHISA5,UNC13D,TP53INP1,DDIT3,STK17B,MAGED1,CD24,DUSP6,EI24,FCGR1A,FCGR2A,ERCC3,RRM2B,AKAP13,CHEK2,FOXO3,RIPK3,NOD1,SH3GLB1,NDUFA13,GCH1,NET1,SMNDC1,MSH6,GPX1…
GO: Biological Process	GO:0010942	positive regulation of cell death		0	148	527	ABR,FADD,TNFSF14,TNFSF12,TNFSF10,HRK,RIPK2,TNFRSF25,TRADD,MBD4,ADORA2A,BCL10,AKT1,ARHGEF7,NAE1,CFLAR,APAF1,FAS,ARRB2,AIFM1,BID,BARD1,BCL2L1,BCL3,BCL6,BNIP3L,NSMAF,CUL4A,CASP1,CASP3,CASP4,CASP8,DYNLL1,CD27,CDK4,BCLAF1,LYST,ARHGEF11,FGD4,HDAC6,SHISA5,UNC13D,TP53INP1,LRRK2,DDIT3,STK17B,MAGED1,CD24,DUSP6,EI24,FCGR1A,FCGR2A,ERCC3,RRM2B,AKAP13,CHEK2,FOXO3,RIPK3,NOD1,SH3GLB1,NDUFA13,GCH1,NET1,SMNDC1,MSH…
GO: Biological Process	GO:0033554	cellular response to stress		0	183	699	AARS,FBXO6,HRK,RIPK2,PARP4,PARP1,MBD4,ADM,TIMELESS,BCL10,AKT1,EIF2B4,NAE1,ASH2L,BAZ1B,APEX1,FAS,AIFM1,GTF2H5,RAD54B,PRDX5,BARD1,ASF1A,BCL3,BCL6,CCNA2,CUL4A,CBS,CASP3,CAT,CD27,BECN1,CHEK1,TRIAP1,PTPLAD1,SLK,CDKN2D,TTRAP,FGD4,RBX1,SH2D3C,PARP3,HDAC6,ALKBH2,COL4A3BP,RDM1,TRAP1,MAPK14,TOPORS,TRIB1,ATG9A,CSNK1D,DDB1,DDIT3,PTTG1,DNA2,PRDX6,BRE,EIF2B1,HERPUD1,FANCE,FECH,FEN1,OS9,ERCC1,ERCC3,CEP63,RUVBL2…
GO: Biological Process	GO:0000278	mitotic cell cycle		0	145	522	CCNK,ACVR1,TIMELESS,AKT1,CDC123,CDC16,NAE1,CDCA5,PRC1,APEX1,AURKB,BUB3,CCNB2,ANAPC13,BCL6,GFI1B,CAMK2G,CCNA2,CCND2,CUL4A,CDC23,AHCTF1,CCNF,CCNE1,CDK2,CDK4,CDK6,RUVBL1,CDC25B,CDC34,CDC20,CHEK1,TRIAP1,KNTC1,CDKN2D,ZC3HC1,ANAPC11,SIRT7,CETN2,CENPA,CKAP5,CENPE,CENPF,PSMD6,NUSAP1,SMC4,NUP37,PSMD14,PTTG1,PSMF1,KIF23,E2F5,BRE,KIF2C,SUGT1,PPP2R3B,CEP63,PMF1,DCTN3,VCPIP1,CCNY,KATNA1,ZWINT,UBE2C,PRMT5,MAEA…
GO: Biological Process	GO:0044419	interspecies interaction between organisms		0	106	346	FADD,RNGTT,CFLAR,BIN1,ANPEP,SLC25A4,SLC25A5,ATP6V0C,BNIP3L,C1QBP,THOC5,APOBEC3G,SCARB1,CD247,CD81,CENPA,CCR2,CREBBP,TLR7,CTSG,THOC4,DDB1,ISG15,EIF4A2,EIF4G1,CPSF4,ERCC3,PAAF1,THOC7,FYN,WWP2,TLR6,RTN3,TRIM22,GYPA,HCK,HCFC1,F11R,HDAC1,RRAGA,GPX1,SMC2,RBCK1,CARM1,GRB2,HTATIP2,HMGA1,HLA-A,SP110,KPNB1,ITGB1,IRF7,LTA,LTBR,SND1,TNPO1,MPO,NCF1C,MAP3K5,CD46,MFGE8,PILRA,PAK2,MYD88,NACA,EIF2AK2,MAPK3,MAPK1,…
GO: Biological Process	GO:0006917	induction of apoptosis		0	113	379	ABR,FADD,TNFSF14,TNFSF12,TNFSF10,HRK,TNFRSF25,TRADD,MBD4,ADORA2A,BCL10,ARHGEF7,NAE1,CFLAR,APAF1,FAS,ARRB2,AIFM1,BID,BCL3,BNIP3L,NSMAF,CUL4A,CASP1,CASP3,CASP4,CASP8,CD27,BCLAF1,LYST,ARHGEF11,FGD4,SHISA5,UNC13D,TP53INP1,STK17B,MAGED1,CD24,EI24,FCGR1A,FCGR2A,ERCC3,RRM2B,AKAP13,CHEK2,FOXO3,RIPK3,NOD1,SH3GLB1,NDUFA13,GCH1,NET1,SMNDC1,MSH6,GPX1,GSK3B,HTATIP2,CIDEB,HLA-G,IL7R,IFI16,SP110,JAK2,TUBB,SH2D1…
GO: Biological Process	GO:0012502	induction of programmed cell death		0	113	380	ABR,FADD,TNFSF14,TNFSF12,TNFSF10,HRK,TNFRSF25,TRADD,MBD4,ADORA2A,BCL10,ARHGEF7,NAE1,CFLAR,APAF1,FAS,ARRB2,AIFM1,BID,BCL3,BNIP3L,NSMAF,CUL4A,CASP1,CASP3,CASP4,CASP8,CD27,BCLAF1,LYST,ARHGEF11,FGD4,SHISA5,UNC13D,TP53INP1,STK17B,MAGED1,CD24,EI24,FCGR1A,FCGR2A,ERCC3,RRM2B,AKAP13,CHEK2,FOXO3,RIPK3,NOD1,SH3GLB1,NDUFA13,GCH1,NET1,SMNDC1,MSH6,GPX1,GSK3B,HTATIP2,CIDEB,HLA-G,IL7R,IFI16,SP110,JAK2,TUBB,SH2D1…
GO: Biological Process	GO:0048872	homeostasis of number of cells		0	56	144	TNFSF14,ADA,ADD1,BCL10,AKT1,ALAS2,ANK1,FAS,CCNB2,DNAJA3,BCL2A1,BCL6,DYRK3,BPGM,CASP3,CD7,CDK6,MAFB,TRIM10,MAPK14,DNASE2,CD24,EPB42,FECH,ETS1,F2R,SLC37A4,FOXO3,MAEA,HBZ,HBA2,KLF1,TNFSF13B,SH2B2,HIF1A,IL7R,IREB2,MEN1,SLC11A2,PRDX1,GPR109A,PPP3CB,MLL5,SOD1,RPS6,RPS24,RPS14,RPS19,RPS17,SLC25A38,PRDX2,TAL1,SP1,SPI1,STAT5B,VPREB1
GO: Biological Process	GO:0022402	cell cycle process		0	176	692	CCNK,ACVR1,TIMELESS,AKT1,CDC123,AK1,CDC16,PHGDH,CDCA5,PRC1,APEX1,AURKB,BUB3,CCNB2,RAD54B,BARD1,ANAPC13,BCL6,GFI1B,OSGIN2,CAMK2G,CCNA2,CCND2,CUL4A,CDC23,AHCTF1,CCNF,CCNE1,CDK2,CDK4,CDK6,RUVBL1,CDC25B,CDC34,CDC20,CHEK1,TRIAP1,KNTC1,CDKN2D,ZC3HC1,ANAPC11,SIRT7,CETN2,CENPA,CKAP5,CENPE,CENPF,PSMD6,CKS2,NUSAP1,CREBBP,REC8,SMC4,NUP37,TP53INP1,PSMD14,DDIT3,PTTG1,PSMF1,KIF23,ROCK2,E2F5,KIF2C,SUGT1,PPP2R3B…
GO: Biological Process	GO:0009615	response to virus		1e-06	58	158	AP2B1,BCL3,BST2,BNIP3L,APOBEC3G,BECN1,CDK6,LYST,AP2M1,AP2S1,TLR7,TLR8,UNC13D,DEFA3,DEFA1,ENO1,ISG15,EEF1G,FGR,LILRB1,IRF9,TRIM22,IFI44,NPC2,POLR3C,HSPB1,IFI16,IFI35,IFNAR2,IFNAR1,IRF7,ISG20,IL15,LCN2,STMN1,MX2,ODC1,MYD88,EIF2AK2,DNAJC3,IFIH1,PLSCR1,POLR3B,TBK1,RNASEL,ABCE1,PTPRC,DDX58,CCL8,RPS15A,TNF,TRIM5,STAT1,STAT2,TPT1,CXCR4,TRIM25,ZNF175
GO: Biological Process	GO:0022613	ribonucleoprotein complex biogenesis		1e-06	88	285	EIF2S2,EIF2B4,SFRS2IP,BYSL,SIP1,EIF3I,EIF3J,EIF3D,EIF3F,EIF3G,EIF3H,EIF3B,EIF4EBP3,BMS1,CLNS1A,RCL1,POP5,DDX1,DKC1,EIF4A2,EIF4G1,EIF5,EIF2B1,LGTN,GEMIN4,FECH,EBNA1BP2,SF3A3,FBL,UTP14A,KRR1,EMG1,MRTO4,PRMT5,NPM3,SMNDC1,CUGBP2,HSPB1,EIF2C2,PRPF19,EIF3K,LSM2,EIF3E,EXOSC8,EIF2AK1,PA2G4,NHP2L1,WDR12,RARA,RPL11,RPL5,RNASEL,SNRPF,SNRPG,SNRPD2,SNRPB,SFRS6,GTPBP4,RPS6,RPS5,RPS7,RPS10,RPS2,RPS3A,RPS3,RPL35…
GO: Biological Process	GO:0034101	erythrocyte homeostasis		3e-06	35	76	ADD1,ALAS2,ANK1,BCL6,DYRK3,BPGM,CDK6,MAFB,TRIM10,MAPK14,DNASE2,CD24,EPB42,FECH,ETS1,FOXO3,MAEA,HBZ,HBA2,KLF1,HIF1A,IREB2,SLC11A2,PRDX1,MLL5,RPS6,RPS24,RPS14,RPS19,RPS17,SLC25A38,TAL1,SP1,SPI1,STAT5B
GO: Biological Process	GO:0051726	regulation of cell cycle		9e-06	128	485	CCNK,FBXO6,TIMELESS,BCL10,AKT1,CDC123,CDC16,NAE1,BIN1,APEX1,BUB3,RHOB,CDC45L,AXIN2,BCR,BCL6,MADD,CCNA2,CCND2,CASP3,CDC23,CCNE1,CCND3,CDK2,CDK4,CDK6,RASSF2,CHEK1,TRIAP1,KNTC1,CDKN2D,CENPE,CENPF,CKS1B,CKS2,MAFB,NUSAP1,CREBBP,MAPK14,TRIM13,DDB1,MAFA,FLCN,AIM2,ROCK2,E2F5,E2F2,BRE,CCNI,CDK5RAP3,FHIT,ERCC3,CEP63,EXT1,ZMYND11,CHEK2,CCNY,CDC37,ZWINT,UBE2C,TACC3,PLEKHO1,PRMT5,MAEA,PLK4,HCFC1,HDAC1,HTATIP2…
GO: Biological Process	GO:0051716	cellular response to stimulus		1.2e-05	240	1058	AARS,DPM2,FBXO6,HRK,RIPK2,PARP4,PARP1,MBD4,ADM,AES,TIMELESS,BCL10,AKT1,EIF2B4,NAE1,SOCS2,ASH2L,AIP,BAZ1B,SOCS3,APEX1,FAS,ARRB2,AIFM1,GTF2H5,RAD54B,PRDX5,BARD1,ASF1A,BCL3,BCL6,CCNA2,CCND2,CUL4A,CBS,CASP3,CAT,NCOA1,CD27,CD14,BECN1,CCNE1,CDK2,CDH1,CHEK1,TRIAP1,PTPLAD1,SLK,CDKN2D,TTRAP,FGD4,RBX1,ACSL5,CPT1A,SH2D3C,PARP3,HDAC6,ALKBH2,COL4A3BP,RDM1,NAMPT,TRAP1,MAPK14,TOPORS,TRIB1,ATG9A,CSNK1D,DDB1,DDIT…
GO: Biological Process	GO:0051094	positive regulation of developmental process		1.6e-05	203	867	ABR,FADD,TNFSF14,TNFSF12,TNFSF10,HRK,RIPK2,ACVR1,ADA,TNFRSF25,TRADD,MBD4,ADORA2A,BCL10,AKT1,ARHGEF7,SYNJ1,NAE1,CFLAR,SOCS2,APAF1,SOCS3,FAS,ARRB2,RHOB,ARHGEF1,AIFM1,BAMBI,BID,BARD1,BCL2L1,BCL3,BCL6,BNIP3L,NSMAF,CA2,C5AR1,CAMP,PIAS1,CUL4A,RUNX2,CASP1,CASP3,CASP4,CASP8,DYNLL1,CD27,NUMB,CCNE1,CDK4,BCLAF1,LYST,ARHGEF11,FGD4,HDAC6,SHISA5,UNC13D,MAPK14,OLIG2,TP53INP1,NOG,LRRK2,DDIT3,PDLIM7,STK17B,MAGED1…
GO: Biological Process	GO:0002520	immune system development		1.8e-05	121	456	TNFSF13,RIPK2,ADA,ADD1,ALAS2,ANK1,ASH2L,FAS,CCNB2,DNAJA3,PICALM,BCL3,BCL6,DYRK3,BPGM,CA2,THOC5,KLF11,CASP8,CD27,AHCTF1,CD3D,CDK6,CD79A,CEBPE,GAB2,CCR1,MAFB,GLRX5,TRIM10,GMPR2,KLF6,MAPK14,DNASE2,IL27RA,CD24,EPB42,GAB3,EGR1,FECH,ERCC1,ESRRA,ETS1,DLL1,SLC37A4,XRCC6,FOXO3,TACC3,MAEA,MSH6,HBZ,HBA2,KLF1,HSP90AA1,HMGB3,HLX,POLL,HIF1A,HHEX,IL4R,IL7R,RBPJ,IFI16,KIT,JAK2,JUNB,ITGB1,IRF1,IL15,LTB,LTA,LTBR,L…
GO: Biological Process	GO:0001775	cell activation		2e-05	124	471	PLDN,TNFSF14,TNFSF13,RIPK2,ADA,ADORA2A,SKAP2,BCL10,FAS,DNAJA3,AZU1,BCL3,BCL6,BST2,NCK2,CASP1,CASP3,ENTPD1,CD27,CD7,CD3D,CCND3,CD81,CD79A,EVL,LYST,GAB2,CENPF,CR2,TLR7,UNC13D,KLF6,TREML2,IL27RA,CD24,EGR1,FCGR3A,FCGR2A,IL21R,ERCC1,F2R,FYB,FYN,PRG3,NDRG1,TLR6,MSH6,GNA13,TNFSF13B,HSP90AA1,HPRT1,HPS1,HMGB3,HLX,HHEX,HLA-G,IL4R,IL7R,IL8,RBPJ,IFNAR1,JAK2,ITGB1,ITGB2,ITGAX,ITGAM,IRF1,IMPDH2,IMPDH1,IL15,IL1…
GO: Biological Process	GO:0022618	ribonucleoprotein complex assembly		2.9e-05	56	163	EIF2S2,EIF2B4,SFRS2IP,SIP1,EIF3I,EIF3J,EIF3D,EIF3F,EIF3G,EIF3H,EIF3B,EIF4EBP3,BMS1,CLNS1A,DDX1,EIF4A2,EIF4G1,EIF5,EIF2B1,LGTN,GEMIN4,FECH,SF3A3,PRMT5,SMNDC1,CUGBP2,HSPB1,EIF2C2,PRPF19,EIF3K,LSM2,EIF3E,EIF2AK1,RARA,SNRPF,SNRPG,SNRPD2,SNRPB,SFRS6,RPS6,RPS5,RPS10,RPS2,RPS3A,RPS3,RPL24,RPS25,RPS15,RPS14,RPS17,PIH1D1,TNF,SF1,EIF4E3,SF3A2,DICER1
GO: Biological Process	GO:0006974	response to DNA damage stimulus		2.9e-05	112	416	FBXO6,PARP4,PARP1,MBD4,TIMELESS,NAE1,ASH2L,BAZ1B,APEX1,AIFM1,GTF2H5,RAD54B,BARD1,ASF1A,BCL3,BCL6,CCNA2,CUL4A,CASP3,CHEK1,TRIAP1,SLK,CDKN2D,TTRAP,RBX1,PARP3,ALKBH2,RDM1,MAPK14,TOPORS,CSNK1D,DDB1,DDIT3,PTTG1,DNA2,BRE,FANCE,FEN1,ERCC1,ERCC3,CEP63,RUVBL2,C17orf70,RRM2B,CHEK2,SUPT16H,XRCC6,FOXO3,RBM14,MSH6,POLQ,GTF2H4,CIDEB,HMGN1,POLL,PRPF19,IFI16,LIG1,NUDT1,MUTYH,BCCIP,MEN1,MCM7,MIF,DTX3L,FOXO4,NTHL1…
GO: Biological Process	GO:0045321	leukocyte activation		3e-05	113	421	PLDN,TNFSF14,TNFSF13,RIPK2,ADA,ADORA2A,SKAP2,BCL10,FAS,DNAJA3,AZU1,BCL3,BCL6,BST2,NCK2,CASP1,CASP3,CD27,CD7,CD3D,CCND3,CD81,CD79A,LYST,GAB2,CENPF,CR2,TLR7,UNC13D,KLF6,TREML2,IL27RA,CD24,EGR1,FCGR3A,FCGR2A,IL21R,ERCC1,FYB,FYN,PRG3,NDRG1,TLR6,MSH6,TNFSF13B,HSP90AA1,HPRT1,HPS1,HMGB3,HLX,HHEX,HLA-G,IL4R,IL7R,IL8,RBPJ,IFNAR1,ITGB1,ITGB2,ITGAX,ITGAM,IRF1,IMPDH2,IMPDH1,IL15,IL13RA1,PREX1,LCP2,LAG3,LAT,M…
GO: Biological Process	GO:0065003	macromolecular complex assembly		4.1e-05	223	982	LIN7A,FADD,SNAP23,TRADD,ADD1,MBD2,SKAP2,ADSL,AP2B1,BCL10,SYNJ1,EIF2S2,EIF2B4,ALAD,ALDOC,SLC7A6,SPAG9,BIRC2,FAS,HIST1H2AG,H1FX,REPS2,TMSB10,SFRS2IP,PICALM,SAMM50,ASF1A,NCK2,HIST1H2AC,HIST1H2BC,HIST1H4C,CAPZA1,PIAS1,OGT,SIP1,CASP8,CAT,EIF3I,EIF3J,EIF3D,EIF3F,EIF3G,EIF3H,EIF3B,AHCTF1,CD3D,VAMP8,CDH2,CDH1,EIF4EBP3,CDA,EVL,BMS1,KNTC1,C20orf7,CENPA,CENPE,CENPF,CUTA,MED24,AP2S1,CLNS1A,CPT1A,HDAC6,SCO2,C…
GO: Biological Process	GO:0030097	hemopoiesis		5.5e-05	109	406	RIPK2,ADA,ADD1,ALAS2,ANK1,ASH2L,FAS,DNAJA3,PICALM,BCL3,BCL6,DYRK3,BPGM,CA2,THOC5,KLF11,CASP8,CD27,AHCTF1,CD3D,CDK6,CD79A,CEBPE,GAB2,CCR1,MAFB,GLRX5,TRIM10,GMPR2,KLF6,MAPK14,DNASE2,CD24,EPB42,GAB3,EGR1,FECH,ERCC1,ESRRA,ETS1,DLL1,SLC37A4,FOXO3,TACC3,MAEA,HBZ,HBA2,KLF1,HSP90AA1,HMGB3,HLX,HIF1A,HHEX,IL4R,IL7R,RBPJ,IFI16,KIT,JAK2,JUNB,ITGB1,IRF1,IL15,LEP,MEN1,SLC11A2,PBX1,BCL11B,NME2,NME1,NOTCH2,PPP3C…
GO: Biological Process	GO:0006952	defense response		8.8e-05	179	760	IL18R1,ABCF1,RIPK2,ACVR1,ADA,PARP4,ADORA2A,AP2B1,AHCY,BCL10,AKT1,CD84,AOAH,APAF1,PGLYRP1,ARRB2,FAIM3,NMI,PROK2,AZU1,BDKRB1,PRDX5,BCL3,BCL6,BNIP3L,HIST1H2BC,SAAL1,C1QB,C2,C5AR1,CAMP,APOBEC3G,CD14,CD19,MARCO,BECN1,CD97,CD81,LYST,DHX58,CEBPE,CCR2,CCR1,CCR7,CCR6,LTB4R,AP2M1,AP2S1,CR2,CR1,TLR7,C1RL,CLEC1B,CLEC1A,TLR8,UNC13D,CTSG,CSF3R,CD163,DEFA4,DEFA3,DEFA1,IL27RA,CD24,FCGR1A,FCGR2A,FGR,F12,F2R,DARC,…
GO: Biological Process	GO:0044248	cellular catabolic process		9.1e-05	287	1335	FBXO4,ACADM,ACADVL,KLHL3,ACOX1,FBXO6,ADA,MBD4,AHCY,HERC1,HERC3,AKT1,FBXL5,FBXL3,CDC16,NAE1,ALDOC,SOCS2,APAF1,SOCS3,PGLYRP1,ARG1,MGAM,ARSA,BUB3,PPIL5,AIFM1,ATP5B,ATP5A1,USP8,ATP5D,ATP5O,FBXO7,BARD1,BCAT2,BCKDHB,ANAPC13,ZFP36L1,BLVRB,BLVRA,BPGM,PIAS1,CBL,CUL4A,CBS,HACL1,CASP3,HERC4,CASP8,CAT,ENTPD1,SCARB1,USP49,CDC23,BECN1,CDC34,CDC20,CDA,UBE2F,CHI3L2,UFC1,ZC3HC1,ANAPC11,TRIM33,PSMD6,USP3,RBX1,PAN2…
GO: Biological Process	GO:0022403	cell cycle phase		0.000133	134	535	CCNK,ACVR1,TIMELESS,AKT1,CDC123,CDC16,CDCA5,PRC1,APEX1,AURKB,BUB3,CCNB2,RAD54B,ANAPC13,BCL6,GFI1B,OSGIN2,CAMK2G,CCNA2,CCND2,CUL4A,CDC23,AHCTF1,CCNF,CCNE1,CDK2,CDK4,CDK6,RUVBL1,CDC25B,CDC34,CDC20,CHEK1,KNTC1,CDKN2D,ZC3HC1,ANAPC11,SIRT7,CETN2,CKAP5,CENPE,CENPF,CKS2,NUSAP1,CREBBP,REC8,SMC4,NUP37,PTTG1,KIF23,E2F5,KIF2C,SUGT1,PPP2R3B,CEP63,PMF1,DCTN3,VCPIP1,CCNY,KATNA1,ZWINT,UBE2C,TACC3,PRMT5,MSH6,NUD…
GO: Biological Process	GO:0048534	hemopoietic or lymphoid organ development		0.000162	113	433	RIPK2,ADA,ADD1,ALAS2,ANK1,ASH2L,FAS,CCNB2,DNAJA3,PICALM,BCL3,BCL6,DYRK3,BPGM,CA2,THOC5,KLF11,CASP8,CD27,AHCTF1,CD3D,CDK6,CD79A,CEBPE,GAB2,CCR1,MAFB,GLRX5,TRIM10,GMPR2,KLF6,MAPK14,DNASE2,CD24,EPB42,GAB3,EGR1,FECH,ERCC1,ESRRA,ETS1,DLL1,SLC37A4,FOXO3,TACC3,MAEA,HBZ,HBA2,KLF1,HSP90AA1,HMGB3,HLX,HIF1A,HHEX,IL4R,IL7R,RBPJ,IFI16,KIT,JAK2,JUNB,ITGB1,IRF1,IL15,LTB,LTA,LTBR,LEP,MEN1,SLC11A2,PBX1,BCL11B,NME…
GO: Biological Process	GO:0007243	protein kinase cascade		0.000166	156	648	FADD,TNFSF14,TNFSF10,RIPK2,TRADD,ADRA2C,BCL10,AKT1,CFLAR,SOCS2,SPAG9,SOCS3,BIRC2,ARRB2,NMI,PROK2,BCL3,BST2,C5AR1,MADD,MKNK1,PIAS1,CBS,CASP1,CASP8,CAT,CD27,CD81,PTPLAD1,CXXC5,CCR2,FGD4,TNFSF15,SH2D3C,SHISA5,TLR7,TLR8,MAPK14,PRKAG2,TRIB1,TRIM13,LRRK2,MAPKAPK2,STK17B,RPS6KA5,MAP4K4,AKAP7,CD24,DUSP6,MARK2,EFNA1,F2R,MAP4K5,FYB,FYN,FOXO1,GPR177,RIPK3,MAP3K7IP1,APOL3,TRIM38,NOD1,IRAK4,TLR6,SPRY1,MAP3K2,…
GO: Biological Process	GO:0030099	myeloid cell differentiation		0.000172	64	205	ADD1,ALAS2,ANK1,FAS,BCL6,DYRK3,BPGM,CA2,THOC5,CASP8,CDK6,CEBPE,GAB2,CCR1,MAFB,TRIM10,GMPR2,MAPK14,DNASE2,EPB42,GAB3,FECH,ESRRA,ETS1,FOXO3,MAEA,HBZ,HBA2,KLF1,HMGB3,HIF1A,HHEX,IFI16,KIT,JAK2,JUNB,LEP,SLC11A2,NME2,NME1,PLSCR1,PML,RARA,MLL5,OSTM1,SOAT1,RPS6,RPS14,RPS19,TGFBR2,SLC25A38,TESC,TLR4,TNF,SNRK,TFE3,TAL1,SP1,SPIB,SPI1,RASGRP4,STAT5B,ZFP36,TRAF6
GO: Biological Process	GO:0002237	response to molecule of bacterial origin		0.000178	42	113	RIPK2,ADM,BCL10,SOCS3,BDKRB1,C5AR1,CASP1,SCARB1,CD14,CCR1,CTSG,MAPK14,TRIB1,CD24,F2R,FOS,TLR6,GCH1,HLA-G,IL6R,LTA,MYD88,PELI1,NCF2,EIF2AK2,MAPK3,MAPK1,SERPINA1,PTAFR,PTGS2,SNCA,LY96,TLR5,TLR2,TLR1,TLR4,TNFRSF1A,TCF3,PRDX2,TAP2,STAT1,STAT5B
GO: Biological Process	GO:0044085	cellular component biogenesis		0.000208	297	1401	LIN7A,FADD,SNAP23,ACTG1,ACTN4,TRADD,ADD1,MBD2,SKAP2,ADSL,AP2B1,TTLL3,BCL10,SYNJ1,EIF2S2,EIF2B4,ALAD,ALDOC,SLC7A6,SPAG9,BIRC2,FAS,HIST1H2AG,H1FX,REPS2,TMSB10,SFRS2IP,PICALM,CBY1,SAMM50,ASF1A,NCK2,HIST1H2AC,HIST1H2BC,HIST1H4C,BYSL,CAPZA1,CAPN3,PIAS1,OGT,GPR65,SIP1,CASP8,CAT,EIF3I,EIF3J,EIF3D,EIF3F,EIF3G,EIF3H,EIF3B,AHCTF1,CD3D,BECN1,VAMP8,CDH2,CDH1,EIF4EBP3,CDA,CD151,EVL,BMS1,KNTC1,C20orf7,SIRT7,CE…
GO: Biological Process	GO:0051301	cell division		0.000218	97	358	CCNK,TIMELESS,CDC123,CDC16,CDCA5,ANXA11,PSTPIP1,PRC1,AURKB,BUB3,CCNB2,CDC45L,ANAPC13,CCNA2,CCND2,CAT,NUMB,CDC23,AHCTF1,CCNF,CCNE1,CCND3,CDK2,CDK4,CDK6,RUVBL1,CDC25B,CDC20,KNTC1,ZC3HC1,ANAPC11,ARHGEF11,CETN2,CKAP5,CENPE,CENPF,CKS1B,CKS2,NUSAP1,SMC4,NUP37,PTTG1,KIF23,ROCK2,VPS4B,KIF2C,CEP63,PMF1,DCTN3,CCNY,KATNA1,ZWINT,UBE2C,RAB35,MAEA,NUDC,SMC2,SSSCA1,ASPM,NUP43,KIF11,KIFC1,KIT,SGOL2,OIP5,MAD2L1,L…
GO: Biological Process	GO:0043933	macromolecular complex subunit organization		0.000222	234	1060	LIN7A,FADD,SNAP23,TRADD,ADD1,MBD2,SKAP2,ADSL,AP2B1,BCL10,SYNJ1,EIF2S2,EIF2B4,ALAD,ALDOC,SLC7A6,SPAG9,BIRC2,FAS,HIST1H2AG,H1FX,REPS2,TMSB10,SFRS2IP,PICALM,SAMM50,ASF1A,NCK2,HIST1H2AC,HIST1H2BC,HIST1H4C,CAPZA1,PIAS1,OGT,SIP1,CASP8,CAT,EIF3I,EIF3J,EIF3D,EIF3F,EIF3G,EIF3H,SCARB1,EIF3B,AHCTF1,CD3D,VAMP8,CDH2,CDH1,EIF4EBP3,CDA,EVL,BMS1,KNTC1,C20orf7,CENPA,CENPE,CENPF,CUTA,MED24,AP2S1,CLNS1A,CPT1A,HDAC6…
GO: Biological Process	GO:0042440	pigment metabolic process		0.000264	26	55	ADA,ALAS2,ALAD,APRT,BLVRB,BLVRA,TMEM14C,SLC25A39,DDT,FECH,FXN,CYB5R4,GART,PAICS,HPRT1,HMBS,IREB2,SLC11A2,MYO5A,PPOX,PPAT,PRPS1,C1orf69,SLC25A38,UROD,UROS
GO: Biological Process	GO:0044265	cellular macromolecule catabolic process		0.000264	203	897	FBXO4,KLHL3,FBXO6,MBD4,HERC1,HERC3,AKT1,FBXL5,FBXL3,CDC16,NAE1,ALDOC,SOCS2,APAF1,SOCS3,PGLYRP1,MGAM,BUB3,PPIL5,AIFM1,USP8,FBXO7,BARD1,ANAPC13,ZFP36L1,BPGM,PIAS1,CBL,CUL4A,CASP3,HERC4,CASP8,USP49,CDC23,CDC34,CDC20,UBE2F,CHI3L2,UFC1,ZC3HC1,ANAPC11,TRIM33,PSMD6,USP3,RBX1,PAN2,LSM7,HDAC6,SAE1,CTBS,CTRL,PRKAG2,TOPORS,PSMD14,CSNK1D,DDB1,UBE2L6,PPP1R3B,ZCCHC6,ZYG11B,DNA2,DNASE2,PSMF1,BRE,RNF14,ENO1,ENO3…
GO: Biological Process	GO:0030218	erythrocyte differentiation		0.000275	30	69	ADD1,ALAS2,ANK1,BCL6,DYRK3,BPGM,CDK6,MAFB,TRIM10,MAPK14,DNASE2,EPB42,FECH,ETS1,FOXO3,MAEA,HBZ,HBA2,KLF1,HIF1A,SLC11A2,MLL5,RPS6,RPS14,RPS19,SLC25A38,TAL1,SP1,SPI1,STAT5B
GO: Biological Process	GO:0006259	DNA metabolic process		0.000314	147	608	FBXO6,TNFSF13,TOP3B,PARP4,PARP1,MBD4,ADRA1D,NAE1,APAF1,APEX1,AIFM1,DNAJA3,GTF2H5,RAD54B,CDC45L,BARD1,ASF1A,BCL6,CUL4A,CASP3,CCNE1,CDK2,RUVBL1,CDC34,CHEK1,SLK,CDKN2D,TTRAP,CENPF,GINS2,RBX1,PARP3,ALKBH2,REC8,RDM1,CSNK1D,DDB1,PTTG1,DNA2,DNASE2,DNMT1,DNTT,DKC1,IL27RA,DUT,BRE,FANCE,FEN1,FHIT,ERCC1,ERCC3,RUVBL2,C17orf70,RRM2B,SUPT16H,RMI1,XRCC6,FOS,RBM14,MSH6,POLQ,GTF2H4,HMGA1,HMGN1,POLL,PRPF19,IL7R,RB…
GO: Biological Process	GO:0009617	response to bacterium		0.000329	70	235	RIPK2,ADM,BCL10,SOCS3,PGLYRP1,AZU1,BDKRB1,BCL3,HIST1H2BC,C5AR1,CAMP,CASP1,SCARB1,CD14,LYST,CEBPE,CCR1,CTSG,MAPK14,TRIB1,DEFA4,DEFA3,DEFA1,IL27RA,CD24,FCGR1A,FGR,F2R,FOS,NOD1,TLR6,GCH1,HCK,GPX1,NLRC4,HLA-G,IL6R,RBPJ,SP110,LTA,MPO,MYO1F,NCF1C,MYD88,PELI1,NCF2,EIF2AK2,MAPK3,MAPK1,PRG2,CFP,SERPINA1,TBK1,RNASE3,PTAFR,PTGS2,SNCA,LY96,TLR5,TLR2,TLR1,TLR4,TNFRSF1A,TNF,TCF3,PRDX2,TAP2,STAT1,STAT5B,NLRP1
GO: Biological Process	GO:0046148	pigment biosynthetic process		0.00042	23	46	ADA,ALAS2,ALAD,APRT,TMEM14C,SLC25A39,DDT,FECH,FXN,GART,PAICS,HPRT1,HMBS,IREB2,SLC11A2,MYO5A,PPOX,PPAT,PRPS1,C1orf69,SLC25A38,UROD,UROS
GO: Biological Process	GO:0046907	intracellular transport		0.000523	210	942	SNAP23,PLDN,TNFSF14,AP2B1,AP1G1,AKT1,AIP,ARF1,ARNTL,RHOB,RERE,ATP5B,ATP5A1,ATP5D,PICALM,ATP5I,ATP5J,ATP5O,BID,BARD1,BCL2L1,BCL3,BCL6,MYL6B,UXT,PTTG1IP,SLC25A20,THOC5,KHSRP,BLZF1,DYNLL1,CD27,STX10,STX11,VAMP8,CDH1,LRBA,EVL,ZFYVE16,LYST,CHMP5,CENPE,CENPF,TOMM70A,MVP,AP2M1,CCS,AP2S1,TOM1,HDAC6,TLR7,SLC25A37,SLC25A15,WASF2,NUP37,OPTN,LRPPRC,CHCHD4,KIF20A,HOOK1,STX6,CSE1L,TRAPPC4,DDX39,ASPSCR1,THOC4,D…
GO: Biological Process	GO:0006091	generation of precursor metabolites and energy		0.000691	97	366	ACADM,ACADVL,ACOX1,ADSL,AKT1,ALDOC,SLC25A4,ATP5B,ATP5A1,ATP5G1,ATP5G2,ATP5D,ATP6V0C,ATP5I,ATP5J,ATP6V1A,ATP5O,BPGM,CAT,COX7C,COX8A,COX6C,COX17,COX4I1,ATP6V1D,CYB561,CYB5A,CS,PRKAG2,PPP1R3B,NDUFS7,ECH1,ATP5J2,C16orf7,ENO1,ENO3,ENO2,FECH,CYBASC3,ETFB,SLC37A4,G6PC,FXN,CYB5R4,GOT1,NDUFAF1,NDUFA13,GAPDH,TCIRG1,GYG1,ATP5L,GPI,GSK3B,GNMT,HK1,HIF1A,IDH3B,IDH1,LDHB,LEP,UQCRQ,LAMP2,NDUFA11,MDH1,MDH2,MIF,ND…
GO: Biological Process	GO:0033036	macromolecule localization		0.000761	274	1293	LIN7A,SNAP23,PLDN,TNFSF14,ACTN4,SNX3,SNX4,RSL1D1,ADORA2A,AP2B1,AP1G1,AKT1,AIP,ARF1,SELENBP1,ARF3,ARRB2,AURKB,ARNTL,BUB3,RHOB,TMSB10,RERE,PICALM,CBY1,NRIP1,BID,BARD1,BCL3,BCL6,C11orf2,PTTG1IP,THOC5,KHSRP,BLZF1,LRP10,RAB11FIP5,CASP1,SCARB1,CD27,AHCTF1,STX10,STX11,CDH2,CDH1,LRBA,CHMP2B,CD81,ZFYVE16,LYST,CHMP5,CENPA,CKAP5,CENPE,CENPF,CUTA,TOMM70A,OSBPL2,MVP,TNFSF15,AP2M1,AP2S1,ACSL5,TOM1,HDAC6,TLR7,C…
GO: Biological Process	GO:0009259	ribonucleotide metabolic process		0.000784	52	160	ADA,ADSL,AK1,ATP1A1,ATIC,ATP5B,ATP5A1,ATP2A3,ATP1B1,ATP1B2,ATP5G1,ATP5G2,ATP5D,ATP6V0C,ATP5I,ATP5J,ATP6V1A,ATP5O,ENTPD1,ATP2C2,GMPR2,CTPS,ATP6V1D,PRKAG2,VPS4B,ATP5J2,DPYD,C16orf7,ERCC3,ATP8B4,GART,TCIRG1,GCH1,ATP5L,PAICS,IMPDH2,IMPDH1,NME1-NME2,NADK,MYO9B,NME2,NME1,NME3,NME4,PPAT,PRPS1,PFAS,RP2,CANT1,ATP5EP2,RHOQ,ATP11B
GO: Biological Process	GO:0045087	innate immune response		0.000829	62	204	IL18R1,RIPK2,BCL10,PGLYRP1,ARRB2,C1QB,C2,APOBEC3G,MARCO,LYST,DHX58,CR2,CR1,TLR7,C1RL,TLR8,UNC13D,FCGR1A,F12,TLR6,CALCOCO2,GCH1,CNPY3,POLR3C,CXCL16,HLA-G,SP110,TUBB,SH2D1A,UNC93B1,LAG3,KRT1,MPO,MYO1F,MX2,NCF1C,CD46,MIF,CLEC7A,PRDX1,MYD88,PELI1,NCF2,IFIH1,CFP,POLR3B,TBK1,RAB27A,SNCA,DDX58,TLR5,TLR2,TLR1,TLR4,TNFRSF1A,PRDX2,TAP1,TAP2,SP100,STAT5B,SARM1,TRIM25
GO: Cellular Component	GO:0033279	ribosomal subunit		0	82	132	RPL10L,MRPL52,RPL36,MRPS33,MRPL51,MRPL27,MRPS17,FXR2,FAU,RPL35,FTL,MRPS2,MRPS16,HBA2,RPSA,RPL7L1,MRPS22,MRPS24,MRPS26,MRPL11,MRPL41,MRPS15,MRPS11,MRPS9,MRPL22,RPL6,RPL9,RPL8,RPL11,RPL17,RPL18,RPL19,RPL18A,RPL3,RPL4,RPL5,MRPL17,RPS6,RPS5,RPS9,RPS7,RPS12,RPS13,RPS10,RPS11,RPLP1,MRPS12,MRPL12,RPLP2,RPS2,RPS4X,RPS3A,RPS3,RPL31,RPL32,RPL34,RPL38,RPL39,RPL41,RPLP0,RPL23A,RPL22,MRPL23,RPL24,RPL26,RPL27A…
GO: Cellular Component	GO:0005840	ribosome		0	108	213	RPL10L,ABCF1,RSL1D1,MRPL52,APEX1,MRPL46,RPL36,MRPS33,MRPL51,MRPL37,MRPL27,MRPL35,MRPS17,FXR2,MRPL24,FAU,RPL35,FTL,MRTO4,MRPS2,MRPS16,HBA2,NUFIP2,RPSA,MRPL44,RPL7L1,MRPS22,METT11D1,RPL10A,MRPL14,MRPS24,MRPS26,MRPL11,MRPS5,MRPL41,MRPS15,MRPS11,MRPS9,MRPL22,RPL6,RPL9,RPL8,RPL11,RPL13,RPL12,RPL17,RPL15,RPL18,RPL19,RPL18A,RPL3,RPL4,RPL5,MRPL17,MRPL54,RPS6,RPS5,RPS6KA2,RPS9,RPS7,RPS12,RPS13,RPS10,RPS11…
GO: Cellular Component	GO:0022626	cytosolic ribosome		0	61	82	RPL10L,RPL36,FXR2,FAU,RPL35,FTL,HBA2,RPSA,RPL6,RPL9,RPL8,RPL11,RPL13,RPL18,RPL19,RPL18A,RPL3,RPL4,RPL5,RPS6,RPS5,RPS9,RPS7,RPS12,RPS13,RPS10,RPS11,RPLP1,RPLP2,RPS2,RPS4X,RPS3A,RPS3,RPL31,RPL32,RPL34,RPL38,RPL39,RPL41,RPLP0,RPL23A,RPL22,RPL24,RPL26,RPL27A,RPL30,RPS24,RPS25,RPS20,RPS27,RPS27A,RPS29,RPS15,RPS14,RPS15A,RPS19,RPS18,RPS16,RPS17,UBB,UBA52
GO: Cellular Component	GO:0030529	ribonucleoprotein complex		0	190	544	RPL10L,ABCF1,ACTB,ACTN4,RSL1D1,PARP4,MRPL52,APEX1,MRPL46,LSM4,CSDA,SIP1,CASP8,RPL36,SYF2,RUVBL1,MRPS33,MVP,LSM7,CPSF3,MRPL51,SRA1,MRPL37,HNRPDL,MRPL27,MRPL35,POP5,MRPS17,THOC4,DDX1,DKC1,FXR2,EEF2,MRPL24,FAU,GEMIN4,SF3A3,HNRNPA0,PATL1,RUVBL2,FBL,UTP14A,RPP40,RPL35,FTL,KRR1,EMG1,RBM14,MRTO4,MRPS2,MRPS16,POP7,SMNDC1,HBA2,PRPF8,LSM1,EIF2C2,HNRNPU,HNRNPD,HNRNPAB,PRPF19,LSM2,SF4,ILF3,ILF2,PABPC1,NUFIP2…
GO: Cellular Component	GO:0044445	cytosolic part		0	85	162	RPL10L,PRDX5,UXT,RPL36,SRA1,MAPK14,CYB5R3,FXR2,ENO1,ENO3,ENO2,FAU,RPL35,FTL,RGS19,HBQ1,HBG2,HBZ,HBA2,HBB,HBM,HBG1,HBE1,CCT7,CCT2,PDRG1,RPSA,DAPP1,PIK3C2B,PIK3R2,PYCARD,RPL6,RPL9,RPL8,RPL11,RPL13,RPL18,RPL19,RPL18A,RPL3,RPL4,RPL5,RPS6,RPS5,RPS9,RPS7,RPS12,RPS13,RPS10,RPS11,RPLP1,RPLP2,RPS2,RPS4X,RPS3A,RPS3,RPL31,RPL32,RPL34,RPL38,RPL39,RPL41,RPLP0,RPL23A,RPL22,RPL24,RPL26,RPL27A,RPL30,RPS24,RPS25,…
GO: Cellular Component	GO:0005739	mitochondrion		0	364	1475	ACADM,ACADVL,ACOX1,PEX11B,CDS2,ADSL,OCIAD2,AK2,AK1,ALAS2,ALDOC,MRPL52,SLC25A4,SLC25A5,APEX1,MRPL46,FIBP,ATIC,AIFM1,ATP5B,ATP5A1,DNAJA3,ATP5G1,ATP5G2,ATP5D,SNN,ATP5I,ATP5J,ATP6V1A,ATP5O,C21orf33,SAMM50,BID,PRDX5,BCAT2,BCKDHB,BCL2L1,BSG,BNIP3L,C1QBP,AGPS,REXO2,HIGD1A,SLC25A20,AKR7A2,NIF3L1,RAB11FIP5,APOBEC3G,CCDC90B,CASP3,CASP8,CAT,BRP44,MTHFD1L,VAMP8,KIAA0101,CHI3L2,TRIAP1,C20orf7,TMEM14C,SLC25A39…
GO: Cellular Component	GO:0015935	small ribosomal subunit		0	42	64	MRPS33,MRPS17,FAU,FTL,MRPS2,MRPS16,HBA2,RPSA,MRPS22,MRPS24,MRPS26,MRPS15,MRPS11,MRPS9,RPS6,RPS5,RPS9,RPS7,RPS12,RPS13,RPS10,RPS11,MRPS12,RPS2,RPS4X,RPS3A,RPS3,RPS24,RPS25,RPS20,RPS27,RPS27A,RPS29,RPS15,RPS14,RPS15A,RPS19,RPS18,RPS16,RPS17,UBB,UBA52
GO: Cellular Component	GO:0022627	cytosolic small ribosomal subunit		0	31	38	FAU,FTL,HBA2,RPSA,RPS6,RPS5,RPS9,RPS7,RPS12,RPS13,RPS10,RPS11,RPS2,RPS4X,RPS3A,RPS3,RPS24,RPS25,RPS20,RPS27,RPS27A,RPS29,RPS15,RPS14,RPS15A,RPS19,RPS18,RPS16,RPS17,UBB,UBA52
GO: Cellular Component	GO:0044429	mitochondrial part		0	189	670	ACADM,ACADVL,CDS2,OCIAD2,AK2,ALAS2,MRPL52,SLC25A4,SLC25A5,AIFM1,ATP5B,ATP5A1,DNAJA3,ATP5G1,ATP5G2,ATP5D,SNN,ATP5I,ATP5J,ATP5O,SAMM50,BID,BCKDHB,BCL2L1,BNIP3L,C1QBP,SLC25A20,RAB11FIP5,CASP8,CAT,C20orf7,TMEM14C,SLC25A39,TOMM70A,MRPS33,ACSL5,CPT1A,COX7C,COX8A,COX7A2,COX6C,MRPL51,MRPL37,SCO2,MRPL27,COX5B,SLC25A37,MRPL35,ABCB6,COX17,COX4I1,PGAM5,SLC25A15,LRPPRC,CHCHD4,CYB5A,MRPS17,CS,LRRK2,DBT,NDUFS7,…
GO: Cellular Component	GO:0015934	large ribosomal subunit		0	41	70	RPL10L,MRPL52,RPL36,MRPL51,MRPL27,FXR2,RPL35,RPL7L1,MRPS24,MRPL11,MRPL41,MRPL22,RPL6,RPL9,RPL8,RPL11,RPL17,RPL18,RPL19,RPL18A,RPL3,RPL4,RPL5,MRPL17,RPLP1,MRPL12,RPLP2,RPL31,RPL32,RPL34,RPL38,RPL39,RPL41,RPLP0,RPL23A,RPL22,MRPL23,RPL24,RPL26,RPL27A,RPL30
GO: Cellular Component	GO:0022625	cytosolic large ribosomal subunit		0	29	39	RPL10L,RPL36,FXR2,RPL35,RPL6,RPL9,RPL8,RPL11,RPL18,RPL19,RPL18A,RPL3,RPL4,RPL5,RPLP1,RPLP2,RPL31,RPL32,RPL34,RPL38,RPL39,RPL41,RPLP0,RPL23A,RPL22,RPL24,RPL26,RPL27A,RPL30
GO: Cellular Component	GO:0031967	organelle envelope		0	198	741	ACADVL,CDS2,PARP1,OCIAD2,AK2,ALAS2,ANXA11,SLC25A4,SLC25A5,AIFM1,ATP5B,ATP5A1,MTMR6,ATP2A3,ATP5G1,ATP5G2,ATP5D,SNN,ATP5I,ATP5J,ATP5O,SAMM50,BID,BCKDHB,BCL2L1,BNIP3L,BNIP2,SLC25A20,RAB11FIP5,CASP8,CAT,TOR1AIP1,AHCTF1,C20orf7,TMEM14C,CENPF,SLC25A39,TOMM70A,MVP,ACSL5,CPT1A,COX7C,COX8A,COX7A2,COX6C,LASS6,SHISA5,SCO2,COX5B,SLC25A37,ABCB6,COX17,COX4I1,PGAM5,SLC25A15,NUP37,LRPPRC,CHCHD4,CYB5A,CSE1L,LRRK2…
GO: Cellular Component	GO:0031975	envelope		0	199	753	ACADVL,CDS2,PARP1,OCIAD2,AK2,ALAS2,ANXA11,SLC25A4,SLC25A5,AIFM1,ATP5B,ATP5A1,MTMR6,ATP2A3,ATP5G1,ATP5G2,ATP5D,SNN,ATP5I,ATP5J,ATP5O,SAMM50,BID,BCKDHB,BCL2L1,BNIP3L,BNIP2,SLC25A20,RAB11FIP5,CASP8,CAT,TOR1AIP1,AHCTF1,C20orf7,TMEM14C,CENPF,SLC25A39,TOMM70A,MVP,ACSL5,CPT1A,COX7C,COX8A,COX7A2,COX6C,LASS6,SHISA5,SCO2,COX5B,SLC25A37,ABCB6,COX17,COX4I1,PGAM5,SLC25A15,NUP37,LRPPRC,CHCHD4,CYB5A,CSE1L,LRRK2…
GO: Cellular Component	GO:0005654	nucleoplasm		0	250	1035	ACTB,ACTL6A,GNL3,EDF1,RNGTT,PARP1,MBD2,AKT1,CDC16,ASH2L,INTS6,ANXA11,BAZ1B,ELP4,APEX1,ARNTL,SFRS2IP,CTDP1,RERE,MTA1,CBY1,CDC45L,NRIP1,LSM4,ASF1A,CAMK2G,LMO4,PIAS1,OGT,CCNA2,RUNX2,SIP1,CASP3,SNAI3,CDC23,AHCTF1,CCNE1,CDK2,CDK4,RUVBL1,COBRA1,CDC25B,CDC20,CHD4,CHEK1,TH1L,ANAPC11,TTRAP,GIT2,MED15,MED24,CKS1B,MAFB,CPSF3,HDAC6,SRA1,ALKBH2,CREBBP,PHF21A,TRIM28,LRPPRC,KIF20A,MAPK14,PRKAG2,TOPORS,OLIG2,THO…
GO: Cellular Component	GO:0005740	mitochondrial envelope		0	137	485	ACADVL,CDS2,OCIAD2,AK2,ALAS2,SLC25A4,SLC25A5,AIFM1,ATP5B,ATP5A1,ATP5G1,ATP5G2,ATP5D,SNN,ATP5I,ATP5J,ATP5O,SAMM50,BID,BCKDHB,BCL2L1,BNIP3L,SLC25A20,RAB11FIP5,CASP8,CAT,C20orf7,TMEM14C,SLC25A39,TOMM70A,ACSL5,CPT1A,COX7C,COX8A,COX7A2,COX6C,SCO2,COX5B,SLC25A37,ABCB6,COX17,COX4I1,PGAM5,SLC25A15,CHCHD4,CYB5A,LRRK2,NDUFS7,COX5A,CYB5R3,ATP5J2,SLC25A44,ACSL3,ACSL1,ACSL4,FECH,TOMM34,AFG3L2,GRPEL2,CLPX,FYN,…
GO: Cellular Component	GO:0031966	mitochondrial membrane		0	130	462	ACADVL,CDS2,OCIAD2,AK2,ALAS2,SLC25A4,SLC25A5,AIFM1,ATP5B,ATP5A1,ATP5G1,ATP5G2,ATP5D,SNN,ATP5I,ATP5J,ATP5O,SAMM50,BID,BCKDHB,BCL2L1,SLC25A20,RAB11FIP5,CASP8,C20orf7,TMEM14C,SLC25A39,TOMM70A,ACSL5,CPT1A,COX7C,COX8A,COX7A2,COX6C,SCO2,COX5B,SLC25A37,ABCB6,COX4I1,PGAM5,SLC25A15,CYB5A,LRRK2,NDUFS7,COX5A,CYB5R3,ATP5J2,SLC25A44,ACSL3,ACSL1,ACSL4,FECH,TOMM34,AFG3L2,GRPEL2,CLPX,GK2,GK,GOT2,NDUFAF1,SH3GLB1,…
GO: Cellular Component	GO:0005730	nucleolus		1e-06	204	881	IQGAP1,ACTN4,GNL3,ADAR,RSL1D1,PARP1,MBD4,MBD2,ARHGEF7,INTS6,ZMYM6,REPS2,BUB3,MTA1,USP8,BYSL,APOBEC3G,CBS,CASP1,CASP3,CASP8,RPL36,NOL11,OASL,BMS1,ARHGEF11,SIRT7,CEBPE,CLEC2B,KIAA0020,DDX47,NUSAP1,PQBP1,RDM1,RCL1,TRIM28,CYB561,POP5,ARL4A,OLIG2,TP53INP1,PSMD14,TRIM13,TSEN34,DDX10,SAP30L,KLF4,DKC1,GRAP2,QKI,POLR1C,GEMIN4,EBNA1BP2,PUS1,FCGR2A,ZNF350,FKBP4,PGRMC1,FBL,MIDN,UTP14A,RPP40,ETV6,RPL35,FOS,KR…
GO: Cellular Component	GO:0019866	organelle inner membrane		2e-06	103	374	ACADVL,CDS2,OCIAD2,AK2,ALAS2,SLC25A4,SLC25A5,ATP5B,ATP5A1,ATP5G1,ATP5G2,ATP5D,ATP5I,ATP5J,ATP5O,SAMM50,BCKDHB,SLC25A20,TOR1AIP1,C20orf7,SLC25A39,ACSL5,CPT1A,COX7C,COX8A,COX7A2,COX6C,SCO2,COX5B,SLC25A37,COX4I1,SLC25A15,LRPPRC,NDUFS7,COX5A,CYB5R3,ATP5J2,SLC25A44,FECH,AFG3L2,GRPEL2,CLPX,GOT2,NDUFAF1,TIMM23,NDUFA13,GCDH,DUSP18,ATP5L,HADH,HSD17B10,GPX4,SQRDL,FAHD1,LMNB1,UQCRQ,LBR,NDUFA11,MDH2,MCCC1,OP…
GO: Cellular Component	GO:0005743	mitochondrial inner membrane		3e-06	96	343	ACADVL,CDS2,OCIAD2,AK2,ALAS2,SLC25A4,SLC25A5,ATP5B,ATP5A1,ATP5G1,ATP5G2,ATP5D,ATP5I,ATP5J,ATP5O,SAMM50,BCKDHB,SLC25A20,C20orf7,SLC25A39,ACSL5,CPT1A,COX7C,COX8A,COX7A2,COX6C,SCO2,COX5B,SLC25A37,COX4I1,SLC25A15,NDUFS7,COX5A,CYB5R3,ATP5J2,SLC25A44,FECH,AFG3L2,GRPEL2,CLPX,GOT2,NDUFAF1,TIMM23,NDUFA13,GCDH,DUSP18,ATP5L,HADH,HSD17B10,GPX4,SQRDL,FAHD1,UQCRQ,NDUFA11,MDH2,MCCC1,OPA1,PC,TOMM22,TIMM22,NDUFA1…
GO: Cellular Component	GO:0005759	mitochondrial matrix		4e-06	74	243	ACADM,ACADVL,ALAS2,MRPL52,SLC25A5,ATP5B,ATP5A1,DNAJA3,ATP5D,BCKDHB,C1QBP,MRPS33,MRPL51,MRPL37,MRPL27,MRPL35,LRPPRC,MRPS17,CS,DBT,DNA2,CARS2,FECH,GRPEL2,ETFB,CLPX,FXN,GOT2,GARS,YARS2,MRPS16,BCKDK,GCDH,FARS2,HADH,HAGH,IDH3B,HSPE1,KIAA1967,C10orf2,ME2,MDH2,MCCC1,MRPS22,PRDX1,PCCB,PC,NDUFA9,MRPS24,MRPS26,MRPL11,MRPL41,MRPS15,MRPS11,MRPS9,PPM1K,PDHB,PDK4,PDK3,QARS,MRPL17,SOD1,SHMT2,TOP1MT,MRPS12,MRPL1…
GO: Cellular Component	GO:0031980	mitochondrial lumen		4e-06	74	243	ACADM,ACADVL,ALAS2,MRPL52,SLC25A5,ATP5B,ATP5A1,DNAJA3,ATP5D,BCKDHB,C1QBP,MRPS33,MRPL51,MRPL37,MRPL27,MRPL35,LRPPRC,MRPS17,CS,DBT,DNA2,CARS2,FECH,GRPEL2,ETFB,CLPX,FXN,GOT2,GARS,YARS2,MRPS16,BCKDK,GCDH,FARS2,HADH,HAGH,IDH3B,HSPE1,KIAA1967,C10orf2,ME2,MDH2,MCCC1,MRPS22,PRDX1,PCCB,PC,NDUFA9,MRPS24,MRPS26,MRPL11,MRPL41,MRPS15,MRPS11,MRPS9,PPM1K,PDHB,PDK4,PDK3,QARS,MRPL17,SOD1,SHMT2,TOP1MT,MRPS12,MRPL1…
GO: Cellular Component	GO:0005625	soluble fraction		5e-06	119	457	AARS,DLK1,ACP1,ACTB,ACTG1,TNFSF10,ADM,ADSL,AKT1,APAF1,ANPEP,FAS,RHOB,AIFM1,BLVRA,NSMAF,CAD,YARS,CBS,CASP3,CCR2,CCS,ABI1,PPP4R1,CYB5A,CTSB,CTSL1,MAPK14,CSNK1D,PPP1R3B,DARS,CYB5R3,AKAP7,RAB8B,FCRL2,DUSP6,DPYD,ENO1,ENO2,EIF2B1,ACSL1,YWHAQ,OS9,EPRS,WDR6,GLO1,GK,GOT1,GARS,GALT,CALCOCO2,GCH1,GCHFR,AP4B1,GYG1,HDC,SPINT2,CAMKK2,FARS2,CUGBP2,HAL,TNFSF13B,GPX1,GPX4,GPI,GSK3B,HSPB1,HPRT1,HPS1,IDH1,IARS,JUP,…
GO: Cellular Component	GO:0044455	mitochondrial membrane part		2.5e-05	48	139	ATP5B,ATP5A1,ATP5G1,ATP5G2,ATP5D,ATP5I,ATP5J,ATP5O,SAMM50,C20orf7,TOMM70A,COX7A2,LRRK2,NDUFS7,ATP5J2,NDUFAF1,TIMM23,NDUFA13,FIS1,DUSP18,ATP5L,OPA1,TOMM22,NDUFA1,NDUFA3,NDUFA4,NDUFA8,NDUFA9,NDUFB2,NDUFB8,NDUFB10,NDUFS3,NDUFV1,NDUFS4,NDUFS5,NDUFS8,PPOX,SDHD,TOMM7,TMEM70,RHOT1,ATP5EP2,UQCRFS1,hCG_25371,ABCB10,CISD2,SARM1,MRPL45
HUMAN PHENOTYPES AND DISEASES
Human Phenotype	HP:0001871	Hematological abnormality		0	125	469	DPM1,ADA,AK2,AK1,ALAS2,PHGDH,ALAD,ANK1,PSTPIP1,FAS,PICALM,GTF2H5,BCR,BCL3,BPGM,CA2,CBS,CASP8,CD247,RFXANK,LYST,CEBPE,GLRX5,CREBBP,COL4A5,VPS13B,SLC25A15,VKORC1,DKC1,FLCN,DGUOK,CYB5R3,CD244,EPB42,FANCE,FECH,PUS1,FCGR3A,ERCC3,ETV6,F12,F5,SLC37A4,G6PC,PANK2,GCLC,NDRG1,ABHD5,GATA1,GALT,TCIRG1,GALC,MSH6,HBG2,HBA2,HBB,HBG1,HAGH,NPC2,GPX1,GPI,HPRT1,HPS1,HK1,SP110,KIT,KCNQ1,JAK2,ITGB2,ITGAX,IRF1,IL12RB1,…
Human Phenotype	HP:0001877	Abnormality of erythrocytes		6e-06	60	194	ADA,AK1,ALAS2,PHGDH,ALAD,ANK1,PSTPIP1,FAS,BPGM,CA2,CD247,LYST,GLRX5,DKC1,FLCN,CYB5R3,EPB42,FANCE,FECH,PUS1,FCGR3A,PANK2,GCLC,GATA1,GALT,TCIRG1,HBA2,HBB,HBG1,HAGH,GPX1,GPI,HPRT1,HK1,JAK2,ITGAX,IRF1,SH2D1A,CD46,SLC11A2,PCCB,NME1,PRPS1,PGK1,LMBRD1,RHAG,OSTM1,PTEN,SLC4A1,EGLN1,RPS19,TPI1,TBXAS1,TCN2,SPTA1,STAT4,UROS,DIRC2,ISCU,KIF1B
Human Phenotype	HP:0001939	Metabolism abnormality		0.000161	252	1383	DPM1,TRPM6,ABR,ACADM,ACADVL,ACOX1,ADA,SNX3,ADSL,AHCY,AKT1,AK1,EIF2B4,ALAS2,PHGDH,ALAD,ANK1,AIP,PSTPIP1,SLC25A4,BSCL2,ARG1,APRT,FAS,ARSA,ATIC,DYSF,GTF2H5,FBXO7,BCR,BCKDHB,BPGM,CA2,C2,AGPS,CAPN3,SLC25A20,CBS,CASP8,CAT,SCARB2,CD247,CDH1,RFXANK,LYST,C20orf7,BBS12,CEBPE,CES1,TRIM33,CPT1A,GLRX5,SCO2,COL6A3,COL4A5,VPS13B,SLC25A15,LRPPRC,VKORC1,CYB5A,CSF2RB,PRKAG2,DDB1,DCK,DBT,NDUFS7,DKC1,FLCN,DGUOK,CYB5…
Human Phenotype	HP:0001903	Anemia		0.000187	52	172	ADA,AK1,ALAS2,PHGDH,ALAD,ANK1,PSTPIP1,FAS,BPGM,CA2,CD247,LYST,GLRX5,DKC1,EPB42,FANCE,FECH,PUS1,FCGR3A,GCLC,GATA1,GALT,TCIRG1,HBA2,HBB,HBG1,GPX1,GPI,HPRT1,HK1,ITGAX,IRF1,SH2D1A,CD46,SLC11A2,PCCB,NME1,PGK1,LMBRD1,RHAG,OSTM1,PTEN,SLC4A1,RPS19,TPI1,TBXAS1,TCN2,SPTA1,STAT4,UROS,ISCU,KIF1B
Human Phenotype	HP:0001881	Abnormality of leukocytes		0.000414	58	205	ADA,AK2,PSTPIP1,FAS,PICALM,GTF2H5,BCR,BCL3,CASP8,RFXANK,LYST,CEBPE,CREBBP,VPS13B,DKC1,FANCE,FCGR3A,ERCC3,ETV6,SLC37A4,GATA1,TCIRG1,MSH6,HBG1,SP110,KIT,JAK2,ITGB2,ITGAX,LYL1,SH2D1A,LPP,KRT1,MYB,MEFV,MCL1,PBX1,PCCB,ICOS,NEU1,LMBRD1,RARA,OSTM1,RAB27A,TBXAS1,TCN2,TAL1,STAT3,STAT4,ARL11,CNBP,UNG,ARHGEF12,TCL1A,NUP214,SETX,CXCR4,ELMOD2
Human Phenotype	HP:0001878	Hemolytic anemia		0.002712	26	67	ADA,AK1,ALAD,ANK1,FAS,BPGM,CD247,EPB42,FECH,FCGR3A,GCLC,GALT,HBA2,HBB,GPX1,GPI,HK1,ITGAX,CD46,PGK1,RHAG,SLC4A1,TPI1,SPTA1,STAT4,UROS
Human Phenotype	HP:0003255	Lactic acidosis		0.003795	24	60	BCKDHB,C20orf7,SCO2,LRPPRC,DBT,NDUFS7,DGUOK,PUS1,SLC37A4,G6PC,MRPS16,HSD17B10,UQCRQ,NDUFA11,C10orf2,PCCB,PC,NDUFA1,NDUFS3,NDUFV1,NDUFS4,NDUFS8,NDUFAF2,ISCU
Human Phenotype	HP:0002664	Oncology		0.005908	81	343	ABR,ADA,AKT1,AIP,PICALM,AXIN2,BCR,BARD1,BCL3,CASP8,CDK4,CDH1,CES1,TRIM33,CREBBP,COL4A5,KLF6,DDB1,PALB2,DKC1,FLCN,FANCE,ERCC3,EXT1,EWSR1,ETV6,F5,CHEK2,SLC37A4,G6PC,FOXO1,GATA1,MSH6,HMMR,HMBS,IL1RN,KIT,CD82,JAK2,IRF1,ING1,LYL1,SH2D1A,LPP,MXI1,MYB,MUTYH,MEN1,MCL1,FOXO4,ODC1,PBX1,PCM1,MYC,NME1,PRKAR1A,PLAG1,SERPINA1,RARA,RNASEL,PTEN,PTPRJ,SDHD,TGFBR2,TIMP2,TLR2,TLR4,TNF,TGFA,AURKA,TAL1,ARL11,WRN,UROD…
Human Phenotype	HP:0001941	Acidosis		0.022224	35	114	ACADM,SLC25A4,ARG1,BCKDHB,CA2,C20orf7,CPT1A,SCO2,LRPPRC,DBT,NDUFS7,DGUOK,PUS1,SLC37A4,G6PC,GK,GALT,MRPS16,GCDH,HSD17B10,UQCRQ,NDUFA11,WNK1,C10orf2,MCCC1,PCCB,PC,NDUFA1,NDUFS3,NDUFV1,NDUFS4,NDUFS8,NDUFAF2,SLC4A1,ISCU
Human Phenotype	HP:0001930	Nonspherocytic hemolytic anemia		0.030644	7	8	BPGM,HBA2,HBB,GPI,HK1,PGK1,TPI1
Disease	D029503	Anemia, Diamond-Blackfan	CTD	0.027558	7	8	RPL11,RPL5,RPS7,RPL35A,RPS24,RPS19,RPS17
MOLECULAR AND CELLULAR PATHWAYS
Pathway	72766	Translation	Reactome	0	84	118	EIF2S2,EIF2B4,EIF3I,EIF3J,EIF3D,EIF3F,EIF3G,EIF3H,EIF3B,RPL36,EEF1A1,EIF4A1,EIF4A2,EIF4G1,EIF5,EIF2B1,EEF2,EEF1G,EEF1B2,FAU,RPL35,EIF3K,EIF3E,PABPC1,RPSA,RPL10A,RPL6,RPL9,RPL8,RPL11,RPL13,RPL12,RPL17,RPL15,RPL18,RPL19,RPL18A,RPL3,RPL4,RPL5,RPS6,RPS5,RPS9,RPS7,RPS12,RPS13,RPS10,RPS11,RPLP1,RPLP2,RPS2,RPS4X,RPS3A,RPS3,RPL31,RPL32,RPL34,RPL35A,RPL37A,RPL38,RPL39,RPL41,RPLP0,RPL23A,RPL22,RPL24,RPL27,…
Pathway	74160	Gene Expression	Reactome	0	128	269	RNGTT,EIF2S2,EIF2B4,CTDP1,EIF3I,EIF3J,EIF3D,EIF3F,EIF3G,EIF3H,EIF3B,RPL36,COBRA1,TH1L,CPSF3,THOC4,EEF1A1,EIF4A1,EIF4A2,EIF4G1,EIF5,EIF2B1,EEF2,EEF1G,EEF1B2,FAU,SF3A3,HNRNPA0,RNPS1,ERCC3,RPL35,SUPT16H,GTF2H4,GTF2F2,HNRNPU,HNRNPD,EIF3K,LSM2,EIF3E,PABPC1,RPSA,YBX1,SF3B5,CPSF1,RPL10A,NHP2L1,POLR2C,POLR2G,POLR2H,POLR2I,RPL6,RPL9,RPL8,RPL11,RPL13,RPL12,RPL17,RPL15,RPL18,RPL19,RPL18A,RPL3,RPL4,RPL5,PTBP…
Pathway	RIBOSOMAL_PROTEINS	RIBOSOMAL_PROTEINS	MSigDB	0	65	106	RPL36,TBC1D10C,FAU,RPL35,RPSA,RPL6,RPL9,RPL8,RPL11,RPL13,RPL12,RPL17,RPL15,RPL18,RPL19,RPL18A,RPL3,RPL4,RPL5,RPS6,RPS5,RPS6KB2,RPS6KA2,RPS9,RPS7,RPS12,RPS13,RPS10,RPS11,RPLP1,RPLP2,RPS2,RPS4X,RPS3A,RPS3,RPL31,RPL32,RPL34,RPL35A,RPL38,RPL39,RPL41,RPLP0,RPL22,RPL24,RPL27,RPL26,RPL27A,RPL30,RPS24,RPS25,RPS20,RPS27,RPS27A,RPS29,RPS15,RPS14,RPS19,RPS18,RPS16,RPS17,LOC388720,UBB,UBC,UBA52
Pathway	hsa03010	Ribosome	KEGG pathway	0	62	102	RPL10L,FAU,RPL35,RPSA,RPL10A,RPL6,RPL9,RPL8,RPL11,RPL13,RPL12,RPL17,RPL15,RPL18,RPL19,RPL18A,RPL3,RPL4,RPL5,RPS6,RPS5,RPS9,RPS7,RPS12,RPS13,RPS10,RPS11,RPLP1,RPLP2,RPS2,RPS4X,RPS3A,RPS3,RPL31,RPL32,RPL34,RPL35A,RPL37A,RPL38,RPL39,RPL41,RPLP0,RPL23A,RPL24,RPL27,RPL26,RPL27A,RPL30,RPS24,RPS25,RPS20,RPS27,RPS27A,RPS29,RPS15,RPS15A,RPS19,RPS18,RPS16,LOC388720,UBA52,LOC440733
Pathway	69278	Cell Cycle (Mitotic)	Reactome	0	64	151	CDC16,AURKB,BUB3,CCNB2,CDC45L,CCNA2,CCND2,CDC23,CCNE1,CCND3,CDK2,CDK4,CDK6,CDC25B,CDC20,ANAPC11,PSMD6,GINS2,REC8,KIF20A,PSMD14,PTTG1,DNA2,PSMF1,KIF23,E2F5,E2F2,E2F3,FEN1,UBE2C,NUDC,MAD2L1,CDT1,MCM4,MCM3,MCM6,MCM5,MCM2,MCM7,ANAPC1,ORC5L,PCNA,POLE,POLE2,RFC4,RPA2,RPA3,PSMD1,PSMD4,PSMB8,PSMB9,PSMC2,PSMC3,PSME1,PSME2,PSMD7,PSMD10,PSMB6,SKP1,ORC6L,TFDP1,AURKA,WEE1,TYMS
Pathway	15869	Nucleotide metabolism	Reactome	5e-06	40	81	ADA,ADSL,AK2,AK1,APRT,ATIC,ATP5B,ATP5A1,ATP5G1,ATP5D,ATP5I,ATP5J,ATP5O,CAD,CDA,CTPS,DCK,DGUOK,ATP5J2,DPYD,SLC29A1,GART,GUK1,ATP5L,PAICS,HPRT1,IMPDH2,IMPDH1,NME2,NME1,NME3,NME4,PPAT,PRPS1,PFAS,RRM1,TK1,NT5C2,TXNRD1,TYMS
Pathway	PRPP-PWY	his+purine+pyrimidine biosynthesis	BioCyc	4.1e-05	23	37	ADSL,AK2,AK1,ATIC,CAD,CTPS,RRM2B,GART,GUK1,PAICS,IMPDH2,IMPDH1,CTPS2,NME2,NME1,NME3,NME4,PPAT,PRPS1,PFAS,PRPSAP2,RRM1,KIF13B
Pathway	PURINE_METABOLISM	PURINE_METABOLISM	MSigDB	0.000467	47	116	ADA,ADSL,AK2,AK1,PAPSS2,APRT,ATIC,ATP5B,ATP5A1,ATP1B1,ATP5G1,ATP5G2,ATP5D,ATP5I,ATP5J,ENTPD1,DCK,DGUOK,ATP5J2,FHIT,GART,GUK1,POLQ,PAICS,HPRT1,POLL,IMPDH2,IMPDH1,PDE7B,NME2,NME1,PPAT,POLR2C,POLR2G,POLR2H,POLR2I,POLE,POLB,PRPS1,PFAS,PDE9A,PDE4D,PDE6G,PDE4B,ADCY4,RRM1,CANT1
Pathway	DENOVOPURINE2-PWY	purine nucleotides <i>de novo</i> biosynthesis I	BioCyc	0.000696	18	28	ADSL,AK2,AK1,ATIC,RRM2B,GART,GUK1,PAICS,IMPDH2,IMPDH1,NME2,NME1,NME3,NME4,PPAT,PFAS,RRM1,KIF13B

## Sheet: PC2 MN TOP1000
TOPPFUN OUTPUT FOR TOP 1000 SIGNIFICANT TRANSCRIPTS FOR MOTHER-NEWBORN COMPARISON (PC2 in MN study)
				P-value	Hits in List	Count in DB	Targets
TRANSCRIPTION FACTOR BINDING SITES
TFBS	STTTCRNTTT_V$IRF_Q6	STTTCRNTTT_V$IRF_Q6		0.001073	26	158	MXI1,VAMP5,ASXL1,DDX58,NR3C2,BCL2L1,OSM,TFDP2,TAP1,CASP1,TNFSF13B,IFI44,CDK6,RNF31,EVL,DHX58,BCL11A,ZBP1,IL18BP,PLXNC1,NAMPT,IFIT2,PSMB8,PSMB9,E2F3,VGLL4
MICRO RNA BINDING SITES
None
DRUGS
Drug	D020122	tert-Butylhydroperoxide	CTD	0	145	1404	SOD1,ADAR,PARP1,AES,MAP2K4,SKP2,MX2,ARHGEF7,SLAMF1,ETS1,EIF2B4,ASXL1,SLC4A1,CDC16,ALAD,EZH2,SCD,ATXN1,MKRN1,MAP3K5,MANSC1,MCM3,SELENBP1,MCM5,MCM2,MCL1,MCM7,FAS,H1FX,BTN3A1,FLNB,MAFF,FOS,ALDH6A1,CCNB2,GSPT2,MME,TGM2,GALM,TLE3,TM7SF2,LSM4,IRF9,TNFRSF1A,OAS3,TNF,SH3GLB1,BCL2L1,PGCP,TCEB2,TCF3,TEX10,FIS1,NSMAF,PRDX2,TFDP1,TFRC,CSDA,GADD45B,STK10,MYO5A,MSH6,NCF4,CUL4A,AUTS2,NDUFB2,TAP1,HADH,CASP3,SP10…
Drug	D005472	Fluorouracil	CTD	5.6e-05	116	1176	FASN,METAP2,TNFRSF10C,PARP1,MXI1,MYB,SLC2A1,ETS1,WDR4,PROM1,SHMT2,SCD,XAF1,IFI6,MCM3,MCM2,MCL1,MCM7,FAS,XRCC6,PARP14,PISD,MAFF,FOS,CCNB2,AIFM1,IRF9,TNF,TMEM184B,GNB2,TPI1,BCL2L1,GART,GAMT,PDXP,NPM3,BNIP3L,TFDP1,TFRC,GADD45B,NASP,HBE1,CCND2,CUL4A,ELOVL5,FARS2,TAP1,CASP1,CASP3,CASP4,CASP8,ENTPD1,EIF3H,RPL10A,NFE2L2,PAICS,NINJ1,GSPT1,NME1,STAT3,STAT1,NME4,NOV,HTATIP2,RCBTB2,HSPB1,CD52,SIGLEC9,CIDEB,…
Drug	CID000004973	heme	Stitch	0.000287	56	446	FECH,MPO,FCGR1A,CYBASC3,SOD1,MYB,EIF2B4,ALAS2,SLC4A1,ALAD,ASH2L,APEX1,FAS,MAFF,FPR2,ATP6V0C,TNFAIP2,TNF,GATA1,QSOX2,PRDX2,CA1,TFRC,GYPA,HBQ1,HBG2,HBZ,HBD,HBG1,HBE1,NCF4,KLF1,NFIL3,NFE2L2,RBCK1,NME4,HTATIP2,PPOX,HSP90AB1,HEMGN,HMBS,MAPK3,GLRX5,UROD,UQCRH,CYB561,CYB5A,MAPK14,CYP1B1,PASK,EIF2AK1,ASPRV1,UQCRQ,ELF2,EIF2B1,KRT1
Drug	CID000004971	protoporphyrin	Stitch	0.000295	28	151	FECH,MPO,ALAS2,ALAD,MCM5,FOS,AIFM1,TNFAIP2,TNF,TFRC,HBQ1,HBG2,HBZ,HBD,HBG1,HBE1,CASP3,NFIL3,PPOX,HSPA6,HMBS,HINT1,TOM1,UROD,DIRC2,CYB5A,MAPK14,EIF2AK1
Drug	C017947	sodium arsenite	CTD	0.000533	90	877	FADD,SOD1,PARP1,MAP2K4,SLC2A1,ETS1,EIF2B4,CDC16,APEX1,DARC,MCM2,MCL1,MCM7,FAS,XRCC6,MAFF,FOS,NR3C2,APOL3,TNFRSF1A,TNFAIP2,TNF,GNB2,TPI1,BCL2L1,HIST1H2AC,PRDX2,GBP1,TFRC,CSDA,CAMK2G,CAPZA1,GADD45B,MSH6,HCK,CCND2,CASP1,CASP3,CASP8,NEDD9,NFE2L2,CDK4,NME1,MRPS5,STAT1,GRB2,SQRDL,NOV,NOTCH2,HSPB1,HSP90AB1,HSPA6,PRNP,CCR7,MAPK13,DNAJA4,ZFP36,MAPK3,XK,IGF2R,TXNRD1,ID3,IFIT1,MAPK14,PIM1,PIK3R2,CSNK2B,CSNK…
Drug	CID000001175	uric acid	Stitch	0.001072	32	199	MPO,SOD1,ADAR,ADA,ADD1,ADSL,G6PC,APRT,TNFAIP2,TNF,GAMT,PDXP,HBQ1,HBG2,HBZ,HBD,HBG1,HBE1,NDUFB8,TAP1,CASP1,GPX7,HPRT1,PRNP,MAPK13,TNFSF15,MAPK14,STEAP4,PYCARD,IMPDH2,TREM1,DPYD
Drug	C006632	arsenic trioxide	CTD	0.001115	62	536	MPO,SOD1,RSL1D1,PARP1,MAP2K4,SLC2A1,RNF24,MCM2,FAS,XRCC6,MAFF,FOS,ALDH6A1,RERE,CCNB2,LHX6,MTA1,ATP5A1,TNFRSF1A,TNF,CLEC7A,BCL2L1,FAM46C,BNIP3L,CCND2,CASP1,CASP3,CASP8,NME1,CCDC52,STAT1,HTATIP2,EVL,HSPB1,HSPA6,BTBD3,CD52,CIDEB,HMGA1,ZFP36,MAPK3,HK1,IFIH1,PECAM1,TYMS,SMC4,PDE4B,IDS,PLXNC1,IFI16,PLAUR,MAPK14,WDR12,PTTG1,PDLIM7,C5orf13,ITM2A,PSMB8,IER2,CREB5,PSMB6,LAT
Drug	D001554	Benzene	CTD	0.001233	47	361	FASN,MPO,PARP1,NUDT1,MYB,ALAS2,F5,SOCS3,ACOT9,G6PC,IL17RA,FOS,MFGE8,TLR2,TNFRSF1A,TNF,BCL2L1,STX3,GADD45B,ELOVL5,CASP1,CASP3,CASP4,CASP8,CDK6,GSK3B,STAT1,RNF31,DNAJB2,CCR7,ZFP36,DNAJC3,CXCL16,USP3,HINT1,IL6R,NAMPT,GPR97,PIM1,RCN2,MAPKAPK2,PTEN,IER2,STOM,PDE7B,EIF4A2,EEF2
Drug	D011794	Quercetin	CTD	0.001555	76	716	FASN,FBLN2,FADD,SOD1,PARP1,MAP2K4,MYB,SLC2A1,CDC16,SIAH2,LDB2,APEX1,MAP3K5,SELENBP1,FAS,H1FX,MIF,MAFF,FOS,FPR2,AIFM1,MME,LEF1,TNF,TPI1,BCL2L1,GATA1,TCEB2,HIST1H2AC,PRDX2,TFRC,MYD88,GADD45B,GYPC,MYO5A,HBG2,CCND2,CASP1,CASP3,CASP8,KIAA1751,NFE2L2,GPI,CDK4,GSK3B,STAT3,STAT1,NME4,HSPB1,HSP90AB1,HPRT1,HMBS,MAPK13,MAPK3,IL1RN,HNRPDL,PDK4,PECAM1,UBB,TXNRD1,TYMS,PKP2,DARS,RPS6KA5,TBK1,RALA,CYP1B1,ECH1,PT…
Drug	D010269	Paraquat	CTD	0.003146	52	431	ACSL1,SLC6A9,MPO,ACP1,SOD1,SIRPA,ACVR1,ADAR,SNCA,PARP1,ADRA1D,AES,SET,ALAD,ATXN1,APEX1,FOS,TNF,BCL2L1,PRDX2,TFRC,GADD45B,CCND2,CASP1,TAP2,CASP3,CASP8,DYNLL1,NFE2L2,NME1,STAT3,STAT1,HSPB1,PRNP,SEMA4A,ZFP36,DNAJC3,MAPK3,CCS,PFKFB4,PDK4,IGF2R,TXNRD1,NAMPT,STX6,MAPK14,LRRK2,KEL,KCNJ15,CYP1B1,IL15,ENO1
Drug	C029892	cupric chloride	CTD	0.004549	10	25	SNCA,PARP1,MT1F,MCM5,MCM2,CASP3,HSPB1,PRNP,CCS,MAPK14
Drug	C404397	NSC 680410	CTD	0.004549	10	25	PARP1,MCL1,AIFM1,BCL2L1,CASP3,CASP8,GSK3B,MAPK3,MAPK14,RAF1
Drug	D019256	Cadmium Chloride	CTD	0.00512	38	277	FASN,ACOX1,ACP1,SOD1,PARP1,SLC2A1,FABP5,G6PC,MCM5,MCM2,MCL1,FOS,ALDH6A1,AIFM1,TNFAIP2,TNF,GTPBP6,HIST1H2AC,HCK,CASP3,CASP8,NFE2L2,STAT3,STAT1,HSPB1,CIDEB,PRNP,MAPK3,IGF2R,TXNRD1,TYMS,MAPK14,PTTG1,RHAG,CYP1B1,EPB41L3,STOM,STMN1
Drug	D002104	Cadmium	CTD	0.005926	35	246	FASN,ACOX1,ACP1,SOD1,PARP1,NUDT1,RAB11FIP1,MT1F,ALAD,FABP5,APEX1,G6PC,MCM2,FOS,ALDH6A1,AIFM1,TNF,GTPBP6,GATA1,CACNA1E,CASP3,CASP8,NFE2L2,STAT3,STAT1,HSPB1,CIDEB,MAPK3,IGF2R,TXNRD1,TYMS,MAPK14,PTTG1,RHAG,STMN1
Drug	CID000000137	5-aminolevulinic acid	Stitch	0.006082	24	135	SLC14A1,FECH,ACP1,FHIT,ALAS2,ALAD,AIFM1,ATP5A1,TFRC,GYPA,HBQ1,HBG2,HBZ,HBD,HBG1,HBE1,KLF1,HADH,PPOX,HMBS,GLRX5,IL1RN,UROD,CYB5A
Drug	D013792	Thalidomide	CTD	0.006852	19	91	MPO,SOD1,PARP1,MYB,MCL1,FAS,TNFRSF1A,TNF,BCL2L1,GADD45B,CASP3,CASP8,STAT3,MAPK3,IL1RN,PECAM1,PLAUR,MAPK14,PIM1
Drug	C494620	CPS 11	CTD	0.007143	6	8	PARP1,MCL1,CASP8,STAT3,MAPK3,MAPK14
Drug	CID000000764	guanine	Stitch	0.013912	87	904	ADAR,ADA,RNGTT,FHIT,NUDT1,ADSL,ADRA1D,HERC1,WDR4,EIF2B4,SLC4A1,SHMT2,APEX1,BSCL2,APRT,ARRB2,MRPS12,FPR2,ATIC,LHX6,TGM2,TLR2,GNG10,GTPBP6,GNB2,BCKDHB,GMPR,GART,TDG,GBP1,RGS19,GUK1,STK10,GYPA,GYPC,MSH6,RHOT1,GRAP,CACNA1E,NDUFB2,GPSM1,GNA13,NFE2L2,PAICS,NME1,RASGRP4,GRB2,NME4,HPRT1,RAB43,PRNP,LTB4R,TUBB6,KIFAP3,MAPK3,GINS2,XPO7,IQSEC1,NT5C2,VAV1,GMPR2,CTPS,FNIP1,ARL4A,DCK,PTTG1,ARHGEF12,ARHGEF18,N6A…
Drug	C027576	4-hydroxy-2-nonenal	CTD	0.014851	33	234	FECH,PARP1,ETS1,SELENBP1,FOS,TNFRSF1A,PRDM1,TNFAIP2,GNB2,BCL2L1,TCF3,TFDP2,CSDA,CCND2,CASP3,CASP8,C6orf108,NFE2L2,GSK3B,HMGA1,ZFP36,DNAJC3,MAPK3,HINT1,IL7R,IL6R,MAPK14,PIK3R2,SERPINI1,RALGDS,CYP1B1,EEF2,LAT
Drug	CID000000784	hydrogen peroxide	Stitch	0.017868	107	1185	FECH,ACOX1,MPO,ACP1,CYBASC3,SOD1,ADAR,ADA,ZNF350,SNCA,PARP1,NUDT1,MAP2K4,MT1F,ETS1,SLC4A1,SOCS2,APEX1,MAP3K5,DOCK5,FAS,PISD,FOS,EGLN1,AIFM1,MME,GK,ATP6V0C,TNFAIP2,TNF,GNB2,BCL2L1,TOP2B,TDG,PRDX2,HBQ1,HBG2,HBZ,HBD,HBG1,HBE1,NCF4,NDUFS3,CASP1,NDUFV1,CASP3,CASP4,CASP8,IFI44,EIF3F,DYNLL1,C6orf108,NFE2L2,GPX7,STAT1,PPOX,KIAA0247,HSPB1,HSP90AB1,HSPA6,HPRT1,CCR7,MAPK13,MAPK3,XK,HINT1,TNFSF15,CCS,PPP1R3D…
Drug	CID000093860	bortezomib	Stitch	0.020343	45	374	METAP2,FADD,PARP1,MAP2K4,SKP2,XAF1,APEX1,MCM5,MCL1,FAS,CCNB2,AIFM1,TM7SF2,TNFRSF1A,TNFAIP2,TNF,BCL2L1,TOP2B,GADD45B,CCND2,CASP1,CASP3,CASP4,CASP8,IFI44,STAT3,RCBTB2,LYST,HSPB1,HSP90AB1,HMBS,MAPK13,MAPK3,MAFB,IL1RN,IL6R,UBB,CTRL,MAPK14,PSMB8,PSMB9,PRTN3,PSMB6,PSME4,KRT1
Drug	C099555	CD 437	CTD	0.023369	29	196	SNRPF,SNRPD2,SOD1,SET,RPS2,ATP5A1,RPS15,RPS17,TGM2,ATP6V0C,GADD45B,ATP5L,CASP3,CASP8,CCT2,CDK4,NME1,TMEM14C,AP2S1,RBX1,UQCRH,CCT3,SLC25A3,RPL8,ILF2,PSMF1,ENO1,EIF4A2,EEF2
Drug	CID000005040	rapamycin	Stitch	0.026608	77	784	METAP2,ACVR1,MAP2K4,SKP2,SLC2A1,EIF2B4,ASH2L,SOCS3,CARHSP1,MAP3K5,G6PC,SELENBP1,DOCK5,MCL1,MCM7,RPS6KB2,FOS,ATIC,CCNB2,AIFM1,TGM2,TNFAIP2,TNF,POLR1D,BCL2L1,BCL3,MYO3B,TFRC,MYO5A,DEGS1,CCND2,CASP1,CASP3,EIF3D,IFI44,EIF3F,EIF3H,EIF3B,CDK4,CDK6,RUVBL1,GSK3B,STAT3,STAT1,CD58,EVL,HSP90AB1,DNAJB2,HPRT1,HMBS,MAPK13,MAPK3,HINT2,IL1RN,IGF2R,PECAM1,FNIP1,CTRL,MAPK14,PIK3R2,PI3,SLC7A5,RPS6KA5,RAF1,JAK2,EIF3…
Drug	CID000027337	hematin	Stitch	0.028231	17	82	SLC14A1,MPO,ACP1,ALAS2,ALAD,DARC,ATP5A1,HBQ1,HBG2,HBZ,HBD,HBG1,HBE1,HMBS,ITLN1,UROD,TYMS
Drug	D017239	Paclitaxel	CTD	0.03111	47	404	FASN,PARP1,SKP2,BIN1,G6PC,MCL1,FAS,RPL23A,CCNB2,AIFM1,TNF,BCL2L1,NDUFA13,GAMT,TDG,PRDX2,SNX10,MYO5A,NDUFB2,CXCR6,CASP3,CASP8,NFE2L2,GPI,NME1,CIDEB,HMBS,MAPK3,TYMS,PKP2,NAMPT,MAPK14,PRRG4,UBE2L6,RAF1,ANP32A,IRF7,TUBB,ECH1,PTEN,E2F3,CD24,PSMB6,DPYD,LAMP2,RAD23A,STMN1
Drug	D012402	Rotenone	CTD	0.032165	57	528	FASN,FANCE,SLC6A12,SLC6A8,SLC6A6,SOD1,ADAR,SNCA,PARP1,NUDT1,SET,SLC2A1,FBXL5,PROM1,ANKRD37,WDR6,CDCA7,MAP3K5,G6PC,FAS,RPS2,RPL7L1,FOS,AIFM1,NDUFB11,GALM,IRF9,TNF,OPA1,PRDX2,ATP5L,NASP,NDUFB2,NDUFB8,CASP3,CASP4,NFE2L2,MSI2,STAT3,MRPS9,LYST,CXXC5,MAPK3,HK1,PDK4,TXNRD1,NUP37,NAMPT,MAPK14,LRRK2,RFC4,WDR19,IRF7,MTA3,ABLIM1,UQCRQ,RAB5A
Drug	CID000005056	resveratrol	Stitch	0.043378	63	610	FADD,MPO,SOD1,ADA,PARP1,SOCS2,APEX1,FAS,XRCC6,IL17RA,FOS,CCNB2,AIFM1,ATP5A1,APOL3,IRF9,TNFAIP2,TNF,TNS1,BCL2L1,HBQ1,HBG2,HBZ,HCK,HBD,HBG1,HBE1,CASP1,CASP3,CASP4,OBFC2A,CASP8,NFE2L2,CDK4,CDK6,GSK3B,GSPT1,STAT3,LYST,SIRT7,MAPK13,TUBB6,MAPK3,TNFSF15,UQCRH,IGF2R,PECAM1,MAPK14,PIK3R2,RPS6KA5,RFC4,STEAP4,RAF1,CYP1B1,TUBB,DUT,LMNB1,IER2,ENO1,ASPRV1,UQCRQ,EIF4A2,ZNF135
Drug	D000111	Acetylcysteine	CTD	0.043393	27	181	SOD1,SNCA,FHIT,PARP1,ATXN1,MAP3K5,FAS,FOS,TNF,GATA1,BPGM,GBP1,CASP3,CASP4,CASP8,NEDD9,NFE2L2,STAT3,STAT1,HTATIP2,HMBS,MAPK3,TXNRD1,MAPK14,RAB24,NDUFS7,DUT
Drug	D004317	Doxorubicin	CTD	0.044652	79	822	FASN,METAP2,FADD,SLC6A6,MPO,ACP1,SOD1,PARP1,RAB11FIP1,MAP2K4,SKP2,SLC2A1,EZH2,MCL1,FAS,FOS,MFGE8,CCNB2,AIFM1,CLIP1,MME,TGM2,C11orf75,TLR2,TNFRSF1A,TNF,TPI1,BCL2L1,TOP2B,NDUFA13,GATA1,GAMT,TCF3,NSMAF,HIST1H2BC,TDG,PRDX2,TFRC,STX3,SNX10,MSH6,HBG2,CCND2,CASP1,HADH,CASP3,CASP4,CASP8,CDK4,GSK3B,ST14,STAT3,STAT1,HSPB1,CES1,ZNF22,PRNP,MAPK3,PKIA,MVP,LSM7,UQCRH,PDK4,TYMS,ID3,CTSS,CTSG,MAPK14,PTTG1,C5orf1…
Drug	D003042	Cocaine	CTD	0.044672	13	52	PARP1,FOS,AIFM1,TNFRSF1A,BNIP3L,CASP3,CASP4,CASP8,CES1,CIDEB,MAGED1,PTEN,SNX27
Drug	CID000001021	1H-Pyrrole-3-propanoic acid, 5-(aminomethyl)-4-(carboxymethyl)-	Stitch	0.044855	10	31	SLC14A1,FECH,ACP1,ALAS2,ALAD,ATP5A1,CDK4,PPOX,HMBS,UROD
Drug	CID000068368	purine nucleoside	Stitch	0.045637	22	131	ADAR,ADA,NUDT1,ADSL,MCL1,APRT,ATIC,TSPAN7,GMPR,TDG,CD52,HPRT1,PRNP,HINT1,HINT2,NT5C2,TYMS,MAPK14,DCK,IMPDH2,SLC29A1,POLE3
Drug	D013876	Thiophenes	CTD	0.046703	15	68	MPO,DDX58,NMI,TGM2,STK10,EIF3B,STAT1,RCBTB2,PRMT1,WIPF1,IFIT3,CSE1L,PIM1,PSMB9,LAMP2
Drug	C026609	beta-solamarine	CTD	0.048418	6	10	FADD,FAS,TNFRSF1A,BCL2L1,CASP3,CASP8
GENE ONTOLOGY CATEGORIES
GO: Biological Process	GO:0044419	interspecies interaction between organisms		1e-06	48	346	FADD,MPO,CPSF4,RNGTT,SLAMF1,BIN1,MAP3K5,RPLP0,MFGE8,ATP6V0C,TLR2,TNFRSF1A,TNF,TLR6,PILRA,BNIP3L,TRIM22,TFRC,MYD88,GYPA,HCK,TAP1,TAP2,SP100,RBCK1,CARM1,SRPK1,STAT3,STAT1,GRB2,HTATIP2,HMGA1,MAPK3,IFIH1,UBE2I,SP110,CTSG,DDB1,KPNB1,TBK1,RALA,IRF7,PSMB8,PSMB9,PSMB6,RAD23A,EIF4A2,TRIM25
GO: Biological Process	GO:0006412	translation		4e-06	54	434	FECH,RSL1D1,EIF2B4,RPS5,RPS6KB2,MRPS12,RPS2,RPL7L1,RPLP0,RPL23A,RPL22,GSPT2,RPS15,RPS17,EIF2C4,TNF,BCL3,NDUFA13,ZNFX1,IGF2BP3,IGF2BP2,FARS2,EIF3D,EIF3F,EIF3H,EIF3B,RPL10A,MRPL14,MRPS24,CDK4,GSPT1,MRPS5,MRPS9,HSPB1,EIF4E3,MAPK3,MRPL51,MRPL37,DDX1,DARS,MRPL22,RPL8,RPL12,RPL4,RPL5,EIF3E,EIF2AK1,QARS,EIF4A2,EIF2B1,EEF2,LGTN,MRPL24,EEF1B2
GO: Biological Process	GO:0046148	pigment biosynthetic process		1.4e-05	15	46	FECH,ADA,ALAS2,ALAD,APRT,SLC25A38,GART,MYO5A,PAICS,PPOX,TMEM14C,HPRT1,HMBS,SLC25A39,UROD
GO: Biological Process	GO:0006917	induction of apoptosis		1.8e-05	48	379	FADD,FCGR1A,FCGR2A,TNFSF12,ARHGEF7,MAP3K5,FAS,ARRB2,AIFM1,TGM2,TLR2,TNF,SH3GLB1,BCL3,NDUFA13,BNIP3L,NSMAF,NET1,MSH6,CUL4A,NDUFS3,TAP1,CASP1,TAP2,CASP3,CASP4,CASP8,GSK3B,STAT1,HTATIP2,NOTCH2,LYST,CIDEB,VAV1,IL7R,UBB,IFI16,SP110,ARHGEF12,PYCARD,ARHGEF18,JAK2,TUBB,MAGED1,PTEN,PREX1,CD24,LAG3
GO: Biological Process	GO:0012502	induction of programmed cell death		1.9e-05	48	380	FADD,FCGR1A,FCGR2A,TNFSF12,ARHGEF7,MAP3K5,FAS,ARRB2,AIFM1,TGM2,TLR2,TNF,SH3GLB1,BCL3,NDUFA13,BNIP3L,NSMAF,NET1,MSH6,CUL4A,NDUFS3,TAP1,CASP1,TAP2,CASP3,CASP4,CASP8,GSK3B,STAT1,HTATIP2,NOTCH2,LYST,CIDEB,VAV1,IL7R,UBB,IFI16,SP110,ARHGEF12,PYCARD,ARHGEF18,JAK2,TUBB,MAGED1,PTEN,PREX1,CD24,LAG3
GO: Biological Process	GO:0009607	response to biotic stimulus		2e-05	57	493	MPO,FCGR1A,SNCA,MX2,SOCS3,DDX58,FOS,TLR2,TLR1,IRF9,TNFRSF1A,TNF,CLEC7A,BCL3,TLR6,TCF3,BNIP3L,TRIM22,HIST1H2BC,PRDX2,MYD88,HCK,CASP1,TAP2,IFI44,NFE2L2,POLR3C,CDK6,GSK3B,STAT1,LYST,HSPB1,HSP90AB1,DNAJB2,HSPA6,DNAJC3,MAPK3,YOD1,PRG2,IFIH1,AP2S1,ITLN1,IL6R,IFI16,SP110,IFNAR2,CTSG,MAPK14,TBK1,IRF7,RNASEL,IL15,PTAFR,CD24,ENO1,STMN1,TRIM25
GO: Biological Process	GO:0042440	pigment metabolic process		2.8e-05	16	55	FECH,ADA,ALAS2,ALAD,APRT,SLC25A38,CYB5R4,GART,MYO5A,PAICS,PPOX,TMEM14C,HPRT1,HMBS,SLC25A39,UROD
GO: Biological Process	GO:0043068	positive regulation of programmed cell death		0.000132	57	520	FADD,FCGR1A,FCGR2A,TNFSF12,SOD1,MAP2K4,SKP2,ARHGEF7,MAP3K5,FAS,ARRB2,AIFM1,TGM2,TLR2,TNF,SH3GLB1,BCL2L1,BCL3,NDUFA13,BNIP3L,NSMAF,NET1,MSH6,CUL4A,NDUFS3,TAP1,CASP1,TAP2,CASP3,CASP4,CASP8,DYNLL1,CDK4,GSK3B,STAT1,HTATIP2,NOTCH2,LYST,CIDEB,VAV1,IL7R,IGF2R,UBB,ID3,IFI16,SP110,LRRK2,ARHGEF12,PYCARD,ARHGEF18,JAK2,TUBB,MAGED1,PTEN,PREX1,CD24,LAG3
GO: Biological Process	GO:0045087	innate immune response		0.000157	31	204	MPO,FCGR1A,SNCA,MX2,DDX58,ARRB2,MIF,TLR2,TLR1,TNFRSF1A,CLEC7A,TLR6,CALCOCO2,PRDX2,MYD88,TAP1,TAP2,SP100,POLR3C,LYST,DHX58,CXCL16,IFIH1,CR1,SP110,TBK1,TUBB,UNC93B1,TRIM25,LAG3,KRT1
GO: Biological Process	GO:0010942	positive regulation of cell death		0.000209	57	527	FADD,FCGR1A,FCGR2A,TNFSF12,SOD1,MAP2K4,SKP2,ARHGEF7,MAP3K5,FAS,ARRB2,AIFM1,TGM2,TLR2,TNF,SH3GLB1,BCL2L1,BCL3,NDUFA13,BNIP3L,NSMAF,NET1,MSH6,CUL4A,NDUFS3,TAP1,CASP1,TAP2,CASP3,CASP4,CASP8,DYNLL1,CDK4,GSK3B,STAT1,HTATIP2,NOTCH2,LYST,CIDEB,VAV1,IL7R,IGF2R,UBB,ID3,IFI16,SP110,LRRK2,ARHGEF12,PYCARD,ARHGEF18,JAK2,TUBB,MAGED1,PTEN,PREX1,CD24,LAG3
GO: Biological Process	GO:0048872	homeostasis of number of cells		0.000225	25	144	FECH,SOD1,ADA,ADD1,ETS1,ALAS2,FAS,CCNB2,RPS17,SLC25A38,BPGM,PRDX2,HBZ,KLF1,CASP3,TNFSF13B,CD7,SPI1,CDK6,MAFB,IL7R,TRIM10,MAPK14,CD24,EPB42
GO: Biological Process	GO:0043065	positive regulation of apoptosis		0.000261	56	517	FADD,FCGR1A,FCGR2A,TNFSF12,SOD1,MAP2K4,SKP2,ARHGEF7,MAP3K5,FAS,ARRB2,AIFM1,TGM2,TLR2,TNF,SH3GLB1,BCL2L1,BCL3,NDUFA13,BNIP3L,NSMAF,NET1,MSH6,CUL4A,NDUFS3,TAP1,CASP1,TAP2,CASP3,CASP4,CASP8,DYNLL1,CDK4,GSK3B,STAT1,HTATIP2,NOTCH2,LYST,CIDEB,VAV1,IL7R,IGF2R,UBB,ID3,IFI16,SP110,ARHGEF12,PYCARD,ARHGEF18,JAK2,TUBB,MAGED1,PTEN,PREX1,CD24,LAG3
GO: Biological Process	GO:0006413	translational initiation		0.000335	18	81	FECH,EIF2B4,RPS5,RPS2,RPS17,TNF,EIF3D,EIF3F,EIF3H,EIF3B,HSPB1,EIF4E3,DDX1,EIF3E,EIF2AK1,EIF4A2,EIF2B1,LGTN
GO: Biological Process	GO:0043067	regulation of programmed cell death		0.00035	90	1006	FADD,MPO,FCGR1A,FCGR2A,TNFSF12,SOD1,ACVR1,ADAR,ADA,SNCA,MAP2K4,SKP2,ARHGEF7,ETS1,SOCS2,SOCS3,MAP3K5,IFI6,MCL1,FAS,ARRB2,MIF,AIFM1,GSPT2,TGM2,TLR2,TNF,OPA1,SH3GLB1,BCL2L1,BCL3,NDUFA13,APBB3,BNIP3L,NSMAF,PRDX2,NET1,MYD88,CSDA,MSH6,CUL4A,NDUFS3,TAP1,CASP1,TAP2,CASP3,CASP4,TNFSF13B,CASP8,DYNLL1,GPI,CDK4,GSK3B,GSPT1,NME1,STAT1,HTATIP2,NOTCH2,LYST,HSPB1,CIDEB,PRNP,HK1,TNFSF15,IFIH1,VAV1,IL1RN,IL7R,IL6R…
GO: Biological Process	GO:0009615	response to virus		0.000377	26	158	MX2,DDX58,IRF9,TNF,BCL3,BNIP3L,TRIM22,MYD88,IFI44,POLR3C,CDK6,STAT1,LYST,HSPB1,DNAJC3,IFIH1,AP2S1,IFI16,IFNAR2,TBK1,IRF7,RNASEL,IL15,ENO1,STMN1,TRIM25
GO: Biological Process	GO:0042981	regulation of apoptosis		0.000399	89	994	FADD,MPO,FCGR1A,FCGR2A,TNFSF12,SOD1,ACVR1,ADAR,ADA,SNCA,MAP2K4,SKP2,ARHGEF7,ETS1,SOCS2,SOCS3,MAP3K5,IFI6,MCL1,FAS,ARRB2,MIF,AIFM1,GSPT2,TGM2,TLR2,TNF,OPA1,SH3GLB1,BCL2L1,BCL3,NDUFA13,APBB3,BNIP3L,NSMAF,PRDX2,NET1,MYD88,CSDA,MSH6,CUL4A,NDUFS3,TAP1,CASP1,TAP2,CASP3,CASP4,TNFSF13B,CASP8,DYNLL1,GPI,CDK4,GSK3B,GSPT1,NME1,STAT1,HTATIP2,NOTCH2,LYST,HSPB1,CIDEB,PRNP,HK1,TNFSF15,IFIH1,VAV1,IL1RN,IL7R,IL6R…
GO: Biological Process	GO:0065003	macromolecular complex assembly		0.000455	88	982	LIN7A,GEMIN4,FECH,FADD,SNRPF,SNRPD2,ADD1,ADSL,SET,EIF2B4,ALAD,SHMT2,SPAG9,MCM2,FAS,H1FX,RPS5,MIF,RPS2,REPS2,RPS15,RPS17,TGM2,IPO11,PICALM,PIH1D1,TMOD1,TNFRSF1A,TNF,PRMT5,TCEB2,TRIM22,HIST1H2AC,HIST1H2BC,CAPZA1,SVIL,NAP1L4,HBG1,TAP1,TAP2,CASP8,EIF3D,EIF3F,EIF3H,EIF3B,SPTA1,AHCTF1,TRIM21,GSK3B,GRB2,EVL,HSPB1,POLR2C,HPRT1,PRNP,HMGA1,TUBB6,MED24,EIF4E3,KIFAP3,WIPF1,XPO7,AP2S1,UQCRH,CSE1L,CSNK2B,LSM2,…
GO: Biological Process	GO:0010941	regulation of cell death		0.000571	90	1017	FADD,MPO,FCGR1A,FCGR2A,TNFSF12,SOD1,ACVR1,ADAR,ADA,SNCA,MAP2K4,SKP2,ARHGEF7,ETS1,SOCS2,SOCS3,MAP3K5,IFI6,MCL1,FAS,ARRB2,MIF,AIFM1,GSPT2,TGM2,TLR2,TNF,OPA1,SH3GLB1,BCL2L1,BCL3,NDUFA13,APBB3,BNIP3L,NSMAF,PRDX2,NET1,MYD88,CSDA,MSH6,CUL4A,NDUFS3,TAP1,CASP1,TAP2,CASP3,CASP4,TNFSF13B,CASP8,DYNLL1,GPI,CDK4,GSK3B,GSPT1,NME1,STAT1,HTATIP2,NOTCH2,LYST,HSPB1,CIDEB,PRNP,HK1,TNFSF15,IFIH1,VAV1,IL1RN,IL7R,IL6R…
GO: Cellular Component	GO:0031967	organelle envelope		5e-06	74	741	ACSL1,FECH,CDS2,NDUFA11,PARP1,OCIAD2,ALAS2,SHMT2,SCD,MKRN1,MCL1,AIFM1,ATP5A1,NDUFB11,IPO11,SLC25A38,ATP5G1,ATP5G2,GK2,GK,OPA1,SH3GLB1,BCKDHB,BCL2L1,NDUFA13,SLC25A42,QSOX2,TEX10,FIS1,BNIP3L,TFDP2,RHOT1,ATP5L,RAB11FIP5,NDUFB2,NDUFB8,NDUFS3,NDUFV1,HADH,CASP8,TOR1AIP1,AHCTF1,SQRDL,NME4,HTATIP2,PPOX,ATP5EP2,TMEM14C,SLC25A39,HK1,MVP,XPO7,UQCRH,PDK4,IGF2R,ABCB6,NUP37,LRPPRC,CYB5A,CSE1L,NUP133,SLC25A3,KP…
GO: Cellular Component	GO:0031975	envelope		9e-06	74	753	ACSL1,FECH,CDS2,NDUFA11,PARP1,OCIAD2,ALAS2,SHMT2,SCD,MKRN1,MCL1,AIFM1,ATP5A1,NDUFB11,IPO11,SLC25A38,ATP5G1,ATP5G2,GK2,GK,OPA1,SH3GLB1,BCKDHB,BCL2L1,NDUFA13,SLC25A42,QSOX2,TEX10,FIS1,BNIP3L,TFDP2,RHOT1,ATP5L,RAB11FIP5,NDUFB2,NDUFB8,NDUFS3,NDUFV1,HADH,CASP8,TOR1AIP1,AHCTF1,SQRDL,NME4,HTATIP2,PPOX,ATP5EP2,TMEM14C,SLC25A39,HK1,MVP,XPO7,UQCRH,PDK4,IGF2R,ABCB6,NUP37,LRPPRC,CYB5A,CSE1L,NUP133,SLC25A3,KP…
GO: Cellular Component	GO:0005739	mitochondrion		1.4e-05	121	1475	FASN,ACSL1,FECH,ACOX1,MPO,SOD1,CDS2,NDUFA11,ADSL,OCIAD2,ALAS2,SHMT2,PTGES2,XAF1,ACOT9,APEX1,IFI6,MCL1,PANK2,MRPS12,PISD,ALDH6A1,ATIC,AIFM1,C10orf10,ATP5A1,NDUFB11,TGM2,SLC25A38,ATP5G1,ATP5G2,GK2,GK,GNG5,OPA1,SH3GLB1,BCKDHB,BCL2L1,NDUFA13,SLC25A42,GART,FIS1,BNIP3L,PRDX2,TFRC,REXO2,RHOT1,ATP5L,RAB11FIP5,FARS2,NDUFB2,NDUFB8,NDUFS3,TAP1,NDUFV1,HADH,CASP3,CASP8,HAGH,CCT7,RPL10A,MRPL14,MRPS24,MTHFD1L,N…
GO: Cellular Component	GO:0044445	cytosolic part		1.6e-05	27	162	RPS5,RPS2,RPLP0,RPL23A,RPL22,RPS15,RPS17,RGS19,HBQ1,HBG2,HBZ,HBM,HBD,HBG1,HBE1,CCT7,CCT2,UBB,MAPK14,PIK3R2,CCT3,PYCARD,RPL8,RPL4,RPL5,ENO1,DAPP1
GO: Cellular Component	GO:0044429	mitochondrial part		2.2e-05	67	670	ACSL1,FECH,SOD1,CDS2,NDUFA11,OCIAD2,ALAS2,SHMT2,MCL1,MRPS12,AIFM1,ATP5A1,NDUFB11,SLC25A38,ATP5G1,ATP5G2,GK2,GK,OPA1,SH3GLB1,BCKDHB,BCL2L1,NDUFA13,SLC25A42,FIS1,BNIP3L,RHOT1,ATP5L,RAB11FIP5,FARS2,NDUFB2,NDUFB8,NDUFS3,NDUFV1,HADH,CASP8,HAGH,MRPS24,SQRDL,NME4,MRPS9,PPOX,ACSS1,ATP5EP2,TMEM14C,SLC25A39,HK1,MRPL51,UQCRH,MRPL37,PDK4,PDK3,ABCB6,LRPPRC,CYB5A,SLC25A3,LRRK2,DBT,NDUFS7,RAF1,DNA2,TDRD7,ABCB10…
GO: Cellular Component	GO:0031966	mitochondrial membrane		4.6e-05	51	462	ACSL1,FECH,CDS2,NDUFA11,OCIAD2,ALAS2,SHMT2,MCL1,AIFM1,ATP5A1,NDUFB11,SLC25A38,ATP5G1,ATP5G2,GK2,GK,OPA1,SH3GLB1,BCKDHB,BCL2L1,NDUFA13,SLC25A42,FIS1,RHOT1,ATP5L,RAB11FIP5,NDUFB2,NDUFB8,NDUFS3,NDUFV1,HADH,CASP8,SQRDL,NME4,PPOX,ATP5EP2,TMEM14C,SLC25A39,HK1,UQCRH,PDK4,ABCB6,CYB5A,SLC25A3,LRRK2,NDUFS7,RAF1,ABCB10,CISD2,UQCRQ,SLC25A44
GO: Cellular Component	GO:0005740	mitochondrial envelope		8.7e-05	52	485	ACSL1,FECH,CDS2,NDUFA11,OCIAD2,ALAS2,SHMT2,MCL1,AIFM1,ATP5A1,NDUFB11,SLC25A38,ATP5G1,ATP5G2,GK2,GK,OPA1,SH3GLB1,BCKDHB,BCL2L1,NDUFA13,SLC25A42,FIS1,BNIP3L,RHOT1,ATP5L,RAB11FIP5,NDUFB2,NDUFB8,NDUFS3,NDUFV1,HADH,CASP8,SQRDL,NME4,PPOX,ATP5EP2,TMEM14C,SLC25A39,HK1,UQCRH,PDK4,ABCB6,CYB5A,SLC25A3,LRRK2,NDUFS7,RAF1,ABCB10,CISD2,UQCRQ,SLC25A44
GO: Cellular Component	GO:0005833	hemoglobin complex		0.000505	7	13	HBQ1,HBG2,HBZ,HBM,HBD,HBG1,HBE1
GO: Cellular Component	GO:0030529	ribonucleoprotein complex		0.000584	54	544	GEMIN4,SNRPF,SNRPD2,PATL1,RSL1D1,FBL,APEX1,RPS5,MRPS12,RPS2,RPL7L1,RPLP0,RPL23A,RPL22,RPS15,RPS17,PIH1D1,LSM4,EIF2C4,CSDA,CASP8,RPL10A,MRPL14,MRPS24,TRIM21,RUVBL1,MSI2,SRP68,MRPS5,MRPS9,PUF60,HNRNPAB,MVP,LSM7,MRPL51,MRPL37,HNRPDL,UBB,WDR12,LSM2,DDX1,MRPL22,TDRD7,SF3B3,RPL8,RPL12,DKC1,RPL4,RPL5,ILF2,MRPS27,BOP1,EEF2,MRPL24
HUMAN PHENOTYPES AND DISEASES
Human Phenotype	HP:0001871	Hematological abnormality		0.0007	50	469	FANCE,FECH,MPO,ADA,MYB,ALAS2,SLC4A1,ALAD,F5,MEFV,G6PC,MCL1,PANK2,FAS,EGLN1,PICALM,TPI1,BCL3,GATA1,BPGM,MSH6,ICOS,HBG2,HBG1,CASP8,HAGH,SPTA1,GPI,NME1,STAT3,STAT1,LYST,HPRT1,HK1,BCL11A,GLRX5,DIRC2,SP110,RHAG,ARHGEF12,JAK2,DKC1,ISCU,LYL1,CD244,PTEN,EPB42,UQCRQ,ELMOD2,KRT1
Human Phenotype	HP:0001877	Abnormality of erythrocytes		0.001535	28	194	FANCE,FECH,ADA,ALAS2,SLC4A1,ALAD,PANK2,FAS,EGLN1,TPI1,GATA1,BPGM,HBG1,HAGH,SPTA1,GPI,NME1,LYST,HPRT1,HK1,GLRX5,DIRC2,RHAG,JAK2,DKC1,ISCU,PTEN,EPB42
Human Phenotype	HP:0001939	Metabolism abnormality		0.003921	102	1383	FANCE,FECH,SLC6A8,ACOX1,MPO,SOD1,ADA,NDUFA11,ADSL,MYB,SLC2A1,EIF2B4,ALAS2,SLC4A1,ALAD,F5,MEFV,BSCL2,G6PC,DARC,PANK2,APRT,FAS,FLNB,APOL2,EGLN1,ATIC,DYSF,GK,FBXO7,PHF11,TNFRSF1A,TNF,BCKDHB,TPI1,GATA1,GAMT,BPGM,PCNT,ICOS,HBQ1,HBG2,HBZ,HBD,HBG1,HBE1,IGF2BP2,NDUFS3,TAP1,TAP2,NDUFV1,HADH,CASP8,HAGH,SPTA1,GPI,NME1,STAT3,PPOX,LYST,CES1,HPRT1,PRNP,TRIM33,HMBS,RPIA,HK1,IFIH1,BEST1,GLRX5,UROD,IL7R,DIRC2,IDS…
Disease	611162	MALARIA, SUSCEPTIBILITY TO	OMIM	0.007171	6	11	SLC4A1,DARC,TNF,GYPA,GYPC,CR1
Disease	D008288	Malaria	CTD	0.02405	6	13	SLC4A1,DARC,TNF,GYPA,GYPC,CR1
MOLECULAR AND CELLULAR PATHWAYS
Pathway	15869	Nucleotide metabolism	Reactome	5.4e-05	21	81	ADA,ADSL,APRT,ATIC,ATP5A1,ATP5G1,GART,GUK1,ATP5L,PAICS,NME1,NME4,HPRT1,NT5C2,TXNRD1,TYMS,CTPS,DCK,IMPDH2,DPYD,SLC29A1

## Sheet: PC3 MN NLP5
TOPPFUN OUTPUT FOR ALL TRANSCRIPTS AT NLP>5 (P<0.00001) FOR PC3 in MN study
				P-value	Hits in List	Count in DB	Targets
TRANSCRIPTION FACTOR BINDING SITES
TFBS	SCGGAAGY_V$ELK1_02	SCGGAAGY_V$ELK1_02		0	157	871	FBXO3,ACTB,AP1M1,TAX1BP1,ALDOA,MAP1B,FXC1,NFS1,MTPN,SLC25A5,DIABLO,MEIS2,RAB8A,MCL1,AATF,ARHGAP1,RHOA,FIBP,ATP5A1,SH3GLB2,ATP5I,NRD1,GRIPAP1,PRDX5,VPS16,BCKDHA,BCL2L1,PLA2G6,ANKMY2,GLTSCR2,UXT,PCBP1,PCBP2,COPS3,BLZF1,CGGBP1,EPN1,SEC61A1,SERTAD1,CARS,GGA1,EIF3H,NEDD8,SFRS9,STX10,ZFYVE16,POLR2K,GDE1,MED15,AP2S1,WDR1,VRK3,BMP2K,COX8A,RNF181,PAIP2,ARPC2,ACTR2,ARPC4,SPG21,COX5B,ATP6V1D,RBM22,NOL7,CSNK…
TFBS	MGGAAGTG_V$GABP_B	MGGAAGTG_V$GABP_B		0.00932	95	560	ACTB,AP1M1,TAX1BP1,FXC1,MTPN,DIABLO,OSTF1,ARHGAP4,ARHGAP1,MFNG,FIBP,ATP6V1A,PRDX5,VPS16,BCL2L1,UXT,FURIN,COPS3,CACNA1D,CBFB,NDUFS3,RAE1,GGA1,NEDD8,SFRS9,BRD9,VAMP8,NME2,BCLAF1,ZFYVE16,SART3,CCR6,WDR1,SLC39A11,BMP2K,PAIP2,ROD1,ARPC1B,ARPC4,PML,ATP6V1D,RBM22,RING1,ARHGAP15,RARB,RALB,DIAPH1,RPA2,CATSPER2,COMMD5,DGUOK,STARD13,ARHGEF6,PSMB1,ELF4,MAP4K2,SEC24C,EIF4A1,FCN1,KIAA1539,SFRS4,EVI2B,SHC1,SIPA…
TFBS	TMTCGCGANR_UNKNOWN	TMTCGCGANR_UNKNOWN		0.010185	28	109	UPF3B,NDUFA11,ASH2L,MDH2,ATP5F1,PRDX1,ZZZ3,DENR,RPL10A,DDX3X,RPL12,RPL17,DGUOK,BZW1,SFRS5,ZNF346,RPS6,RPS15A,RPS19,BANP,RRAGA,SSR4,DCTN2,PUF60,VDAC3,UBE2D3,TMEM209,LAMP1
TFBS	V$ELK1_02	V$ELK1_02		0.016408	40	185	FBXO3,FERMT3,AP1M1,MTPN,DIABLO,ARHGAP1,ATP5A1,BCL2L1,CGGBP1,EPN1,GDE1,MED15,AP2S1,PRCP,BMP2K,COX8A,CRK,ACTR2,RBM22,DDX5,RPL19,PSMC1,PSMD12,SEC24C,EIF4G1,EEF1B2,SNRPB,SON,SHC1,RPS18,KLHDC3,UBAC1,DNAJA2,KRTCAP2,STK4,MTX2,CRB3,POLL,GABARAPL2,TIGD6
TFBS	RCGCANGCGY_V$NRF1_Q6	RCGCANGCGY_V$NRF1_Q6		0.022238	106	654	ACTB,TRAF3IP1,AP1M1,CPNE1,MAX,UBE2M,MTPN,AATF,RHOA,FOXO4,ATP6V0D1,ATP5G2,BCKDHA,SPOP,CAPNS1,AKR7A2,UPF2,CDK10,CBFB,CASP2,SFRS9,MCART1,KBTBD2,PINK1,BCLAF1,ZFYVE16,RNF149,SART3,POLR2A,CFL1,PIAS4,MAP2K2,CIRBP,CCS,PPP2CA,COX6C,PAIP2,ARPC2,ARPC5,WAC,SAE1,ATP6V1D,RWDD1,ACTR1A,SLC25A3,CSNK2B,TDP1,DDX3X,PDLIM7,DAD1,RPL5,BRD2,CLOCK,SEC24C,RAD21,CCNI,SNRPD2,EHD1,SON,CPSF4,RAB10,SFRS2,EWSR1,SHC1,RABGAP1,SAF…
TFBS	V$NRF2_01	V$NRF2_01		0.044952	40	193	FBXO3,AP1M1,MTPN,DIABLO,ARHGAP4,ARHGAP1,FIBP,PRDX5,BCL2L1,KCNAB2,EPN1,EIF3D,DAZAP2,DTX2,ACTR2,ARPC5,ATP6V1D,CSNK2B,DDX5,RPL6,PSMD12,SEC24C,SFRS6,SFRS4,SHC1,RPS5,RPS10,RPL27,RPS18,CAP1,ZNHIT1,TNFRSF1A,GNAI2,CD2BP2,STK4,GSPT1,CRB3,HNRNPD,TIGD6,BAT1
MICRO RNA BINDING SITES
MicroRNA	GGCACTT,MIR-519E	GGCACTT,MIR-519E	MSigDB	0.009691	29	121	DPYSL5,GIGYF1,FURIN,CDK10,FAM134A,DAZAP2,SERTAD2,WAC,FAM53C,DDX3X,PTGFRN,ARID4B,CLOCK,RAB5B,SON,MKRN1,RAB35,SCML2,MGEA5,TBL1X,MAT2B,BICD2,NEDD4L,IRF1,MYST3,TNRC6B,ZNF148,KIAA0922,PPA2
MicroRNA	miR-139	miR-139	PicTar	0.017642	44	224	MAT2A,MAX,MEIS2,ARID1A,TNPO2,BTG1,STK24,CALM3,LSM14A,SEC61A1,KBTBD2,UBE2F,NOTCH1,C7orf29,PPP3CB,PPP2CA,TSPAN5,CTNNB1,SLC25A3,ATG9A,DMD,ROCK2,WTAP,EIF4B,SMOX,YWHAQ,C13orf23,SFRS4,ETS1,SHC1,CCNY,FOXO1,GNB1,TPD52,TCF20,NFAT5,IVNS1ABP,TROVE2,BICD2,MYST3,AP3M1,CDC2L6,PSME4,MBD6
DRUGS
Drug	C099555	CD 437	CTD	0	78	196	ALDOA,UBE2M,SLC25A5,ARF1,ARHGDIB,TMSB10,ATP5B,ATP5A1,ATP6V0C,ATP5J,ODC1,UXT,C11orf10,PCBP1,PCBP2,SH3BGRL3,NACA,CASP3,NFKBIA,CDK4,KIAA0101,CEBPB,AP2M1,AP2S1,CLIC1,PFN1,COX7C,COX7A2,COX6C,ARPC2,ARPC3,SLC25A37,SLC25A3,RPL8,RPL11,RPL19,ITM2B,PSMF1,PSMB1,ENO1,EIF4A1,EIF4A2,EIF4B,EEF2,SNRPD2,SNRPB,SOD1,PNPLA6,MAN1B1,RPL35,CORO1A,CCL5,WDR45,RPS10,RPLP1,RPLP2,RPS2,RPL36AL,RPL39,RPL24,RPS27,RPS15,TOMM7,RP…
Drug	D014810	Vitamin E	CTD	0	271	1453	ACTB,UPF3B,MSN,MSH5,ADD1,EDF1,TRAF3IP1,ADRA2C,CPNE1,AKT1,AHR,NADK,CDC16,CFLAR,ALDOA,PER3,BIN1,INTS6,MDK,DIABLO,MAP3K1,BIRC2,ARAF,ARF5,MDH2,LRRFIP1,GSTK1,DEDD,RHOG,ZBED1,FIBP,ATG12,ATP6V0D1,ATP5B,MMP2,C11orf30,ATP5I,ODC1,NIPBL,BCL2L1,BCL6,BRMS1,TNPO2,PAFAH1B3,CSDA,CAPNS1,IFITM1,CALD1,MYL6,CALM3,SF3B5,CDK10,UBN1,NENF,NDUFA3,NDUFB8,NDUFS3,CAPZB,CASP3,CAT,RPL10A,NEDD8,SFRS9,NFKBIA,CCND3,CDK4,KBTBD2,P…
Drug	CID000000762	guanosine triphosphate	Stitch	0	174	926	ABR,ADSL,AP1M1,AKT1,ARF1,ARHGAP1,ARHGDIB,RHOA,RHOG,BRI3,BCR,ODC1,NUP98,BCL6,CALM2,CALM1,CALM3,SEC61A1,RAE1,RTN4,EIF3D,EIF3F,EIF3G,EIF3H,EIF3B,RPL36,RPL10A,VAMP8,NME2,GIMAP4,POLR2K,CDKN1A,POLR2A,NUPL1,MAP2K2,MAPK3,PRKCD,SRGN,ARHGAP9,GLTP,CRK,PLEK,RASGRP2,CSNK2B,CSK,CSNK1D,CSNK1A1,CSNK1E,DCK,RGS10,DAD1,CYP2D7P1,DNA2,RPL6,RPL8,RPL11,RPL12,RPL17,RPL15,RPL18,RPL19,RPL18A,RPA2,RPL3,DMD,RPL4,RPL5,DGUOK,…
Drug	CID000000730	guanosine diphosphate	Stitch	0	133	651	ABR,ADSL,AP1M1,AKT1,ARF1,ARHGAP1,ARHGDIB,RHOA,RHOG,BCR,SEC61A1,RTN4,PNPT1,EIF3D,EIF3F,EIF3G,EIF3H,EIF3B,RPL36,RPL10A,VAMP8,NME2,POLR2K,CDKN1A,POLR2A,MAP2K2,PRKCD,SRGN,CRK,PLEK,RASGRP2,RGS10,DAD1,RGS2,RPL6,RPL8,RPL11,RPL12,RPL17,RPL15,RPL18,RPL19,RPL18A,RPL3,DMD,RPL4,RPL5,STARD13,EEF1A1,SEC24C,RAC1,RAC2,EIF4A1,EIF4A2,EIF4B,EIF4G1,EEF2,EEF1B2,ARHGEF3,FCER1G,FAU,SHC1,F2R,RPL35,FUT4,RPS6,RPS5,RPS9,RP…
Drug	C472791	3-(4'-hydroxy-3'-adamantylbiphenyl-4-yl)acrylic acid	CTD	0	121	578	ACTB,CDKN2AIPNL,ST6GALNAC3,NADK,CFLAR,ALOX5,UBE2M,NFS1,ARF1,TMSB10,ATP5B,ATP5A1,ATP5I,ATP5J,ATP6V1A,UNC84B,GCA,ODC1,ULK1,UXT,BTG1,C11orf10,HIST1H2AC,PCBP2,MYL4,NACA,NDUFA1,CASP3,VAMP8,CDK4,KIAA0101,RASSF2,CEBPB,CFL1,KLF13,AP2M1,AP2S1,CLK1,CLIC1,PFN1,COX7C,COX7A2,COX6C,PFDN5,ARPC2,COL7A1,ARPC3,COX5B,SLC25A37,VKORC1,RASGRP2,SLC25A3,NCAN,H2AFJ,TDP1,RAP2B,DNMT3B,RPL6,MICALL2,RPL8,RPL19,RPL18A,RPA2,IT…
Drug	D014635	Valproic Acid	CTD	0	153	804	ACAA1,CCM2,ADSL,AES,ALDH9A1,ANXA11,SLC25A5,ARF1,ERO1LB,TMSB10,MGAT1,FAM50A,ATP5I,ATP5J,ATP6AP1,OAZ1,TAGLN2,PAFAH1B3,BPGM,TSPO,PBX2,CASC4,CAMLG,OGT,NDUFA1,NDUFA3,NDUFB2,CASP3,RPL36,RPL10A,NUMB,USP49,NFKBIA,NFKB1,CDK4,CDKN1A,EFHD2,SERTAD2,MAP2K3,PRKACG,TMEM66,LPGAT1,CYB5R1,PFN1,COX7C,CREB1,PFKFB4,ZDHHC7,COX6B1,KLF6,ZNF622,RWDD1,RBM22,CCDC72,FLOT1,UBE2L6,DBI,CYP11A1,PYCARD,RALGDS,RPL17,RPL18A,CYB5R3…
Drug	D018038	Sodium Selenite	CTD	0	204	1188	ABCF1,RPS6KL1,ACHE,ACTB,ADD1,ADSL,AKT1,PER3,ANXA11,SLC25A5,MDK,BIRC2,ARF5,GSTK1,GPHB5,MFNG,MMP2,STARD7,ATP5G2,ATP5F1,ATP6V0A1,NUP98,GTPBP6,PRDX5,BCL2L1,PLSCR3,SH3KBP1,GLTSCR1,UXT,PRDX1,C11orf2,PTTG1IP,COPS3,CAMP,CAMLG,ZZZ3,CALM1,SF3B5,BLZF1,ACOT11,NACA,RUNX3,NDUFA3,NDUFA4,NDUFS3,RTN4,CASP3,CASP10,CAT,RPL10A,NUMB,CD14,CDK4,NME2,LENG1,SART3,CHML,POLR2A,CD52,CFL1,MAP2K2,MAPK3,MAPK1,PRKCD,PPP6C,CLK3,…
Drug	D007657	Ketone Bodies	CTD	0	105	480	DYNLRB1,ACTB,NDUFA11,EDF1,BUD31,ARL5A,ALDOA,MBP,ASH2L,APCS,ARF1,ARAF,MDH2,RHOG,RPL7L1,ATP1A1,ATG12,ATP5B,STARD7,COLQ,ARID1A,ATP5F1,NRGN,ATP6V0A1,ATP6V1E1,ATP6AP1,FBXO7,GRIPAP1,PLSCR3,BNIP3L,DPP7,CACNA1D,SEC61A1,CAPZB,CARS,RTN4,EIF3F,NCOA1,SYF2,PINK1,PPP1CC,EVL,PJA2,AP2M1,AP2S1,PPP2R2B,CLK1,PPP3R1,PPP2CA,GLTP,MED16,PFDN5,AMZ2,TSSC4,CTSB,POMP,NECAP2,ACTR1A,SLC25A3,DDX5,ATP6V1F,PLAA,EHMT1,PSMC1,ECH1…
Drug	D006830	Hydralazine	CTD	0	144	756	ACAA1,CCM2,ADSL,AES,ALDH9A1,SLC25A5,ARF1,ERO1LB,TMSB10,MGAT1,FAM50A,ATP5I,ATP5J,ATP6AP1,OAZ1,PAFAH1B3,BPGM,TSPO,PBX2,CASC4,CAMLG,OGT,NDUFA1,NDUFA3,NDUFB2,RPL36,RPL10A,NUMB,USP49,CDK4,EFHD2,SERTAD2,MAP2K3,PRKACG,TMEM66,LPGAT1,CYB5R1,PFN1,COX7C,PFKFB4,ZDHHC7,COX6B1,KLF6,ZNF622,RWDD1,RBM22,CCDC72,FLOT1,UBE2L6,DBI,RARB,PYCARD,RALGDS,RPL17,RPL18A,CYB5R3,CCDC56,PSMD4,PSMB6,PSMB3,PSMB1,PSMA2,EPAS1,EPHA8…
Drug	D020122	tert-Butylhydroperoxide	CTD	0	222	1404	ABR,ACHE,MPP1,DYNLRB1,ACTB,MSN,ACTN1,ADAR,ADAM8,ADM,CPNE1,MT2A,AES,MT1X,MX2,CDC16,ALDOA,ALOX5,RAB8A,GREM1,MCL1,GSTK1,TMSB10,FIBP,NUCB1,ATP6V1A,OAZ1,PRDX5,CALML4,OGDH,BCL2L1,TNPO2,ANKMY2,BTG1,BTF3,PRDX1,STK24,HIST1H4C,PBX2,CAPN1,CSDA,CAPNS1,IFITM1,CALM1,KCNAB2,ZMIZ1,CALM3,CDK10,OGT,NCF4,CBFB,NDUFA3,TPST2,NDUFB2,CAV2,CASP3,CAT,NFKBIA,NFKB1,CDH11,NME2,CDC25C,CD68,PPP1CA,ZFYVE16,FAM115A,CDKN1A,CEBPB,…
Drug	D002995	Clofibric Acid	CTD	0	124	666	ADSL,AHR,CDC16,ALDOA,ALPL,FXC1,SLC25A5,DIABLO,APCS,TMSB10,MGAT1,ATP1A1,ATF4,ODC1,PRDX5,BTF3,PTTG1IP,IGSF11,CALM2,SEC61A1,NDUFB3,NDUFS3,CASP4,EIF3F,NEDD8,CD14,CDK4,PINK1,NME2,PPP1CC,PPM1B,PPID,CHRNA2,TMBIM1,NUPL1,CUTA,MAP2K3,CCS,LSM7,PPP2CA,VRK3,PFN1,COX8A,COX7A2,SPG21,CTNNB1,ATP6V1D,VKORC1,CTSB,DDB1,DARS,DBI,NDUFS7,SSU72,DYNC1LI2,PLAA,RPL8,RPL18,RPL3,RPL5,CYB5R3,GSTO1,PSMB10,PTBP1,EEF1E1,EIF4A2,E…
Drug	C014707	nitrosobenzylmethylamine	CTD	1e-06	103	532	ACTB,ALOX5,MTPN,ATP6V0E1,OSTF1,GREM1,MCL1,AQP9,GSTK1,TMSB10,ATF4,B2M,ATP6V1B2,ODC1,SH3KBP1,GLTSCR2,PRDX1,PAFAH1B3,TSPO,PCMT1,CALM3,AKR7A2,NENF,SERTAD1,CASP3,NEDD8,NME2,CD81,CD44,PPID,CDKN1A,CEBPB,CEBPD,CFL1,MAPK1,CLIC1,PPP2CA,RNF181,ROD1,ACTR2,ATP6V1D,TOB1,ZMAT3,SLC25A3,CSNK2B,DDX5,CLEC2D,PYCARD,PLAA,ITM2B,PSMC1,ECH1,PSMD12,GMFG,TSC22D3,PSMB1,PSMA6,PSMA2,ENO1,EIF4A1,BZW1,COASY,SERINC3,FDFT1,F2R,P…
Drug	D018684	Glycine Agents	CTD	4e-06	24	57	CYP11A1,RPL6,RPL9,RPL12,RPL19,RPL18A,RPL4,EEF2,RPL35,RPS6,RPS5,RPLP2,RPS2,RPS3A,RPL37A,RPL24,RPL27,RPS25,RPS20,GNB1,MGEA5,HBB,STAR,RPSA
Drug	CID000000784	hydrogen peroxide	Stitch	5e-06	187	1185	ACAA1,ACHE,ACTB,ACTG1,ADAR,EDF1,ADM,MT2A,MT1X,AKT1,ALDH9A1,CFLAR,ALOX5,MBP,MAP3K1,ARAF,MDH2,ATP1A1,ATP6V0D1,MMP2,ATP6V1B2,ATP6V0C,ATP6V1A,ATP6V0B,ATP6V1E1,ATP6AP1,ODC1,PRDX5,OGDH,BCL2L1,PRDX1,HIST1H4C,HIST1H3I,CAPN1,CAPNS1,CALM2,CALM1,CALM3,AKR7A2,CDK10,NCF4,NDUFA1,NDUFA3,CASP1,NDUFS3,CASP3,CASP4,CAT,EIF3F,NFE2,NFKBIA,NFKB1,CDH11,CDC25C,PPP1CC,PPM1G,KIAA0101,PPP1CA,CDKN1A,MAP2K2,MAP2K3,MAPK4,MAPK…
Drug	C028904	isoproturon	CTD	1e-05	23	55	ALPL,SEC61A1,CFL1,RPL6,RPL9,RPL19,RPL18A,COMMD5,EEF2,RPS6,RPS13,RPLP2,RPS2,RPS3A,RPL38,RPL24,RPS25,RPS20,RPS19,RPS18,RPS17,HBB,TUBA1A
Drug	D004237	Diuron	CTD	2.7e-05	24	62	ACHE,AHR,SEC61A1,CFL1,RPL6,RPL9,RPL19,RPL18A,COMMD5,EEF2,RPS6,RPS13,RPLP2,RPS2,RPS3A,RPL38,RPL24,RPS25,RPS20,RPS19,RPS18,RPS17,HBB,TUBA1A
Drug	D004052	Diethylnitrosamine	CTD	3.9e-05	102	560	ADSL,ALDOA,ALPP,ALPL,FXC1,DIABLO,TMSB10,MGAT1,ATP1A1,ATF4,MMP2,ODC1,BCL2L1,BTF3,IGSF11,CALM2,SEC61A1,NDUFS3,CASP4,CAT,CD14,CDK4,NINJ1,NME2,PPM1B,CDKN1A,NUPL1,CUTA,MAP2K3,CCS,LSM7,VRK3,PFN1,COX7A2,ATP6V1D,VKORC1,CTSB,DDB1,DAD1,DBI,DYNC1LI2,PLAA,RPL8,RPL18,RPL3,PSMB10,PTBP1,EEF1E1,PSMB3,ENO1,ERP29,SORL1,SOD2,FGA,SYCP3,SLC17A3,ZMYND11,S100A10,CCNDBP1,CDC37,RPS6,RPS5,RPS9,RPS10,RPS2,RPS3A,RPS3,RPL32,…
Drug	CID000004584	okadaic acid	Stitch	6.2e-05	124	729	ACTB,ACTG1,AKT1,CFLAR,ALPP,ALPL,MAP1B,MBP,SLC25A5,MAP3K1,APCS,BIRC2,MCL1,ATP6V0C,ATP6V0B,DUSP22,ODC1,BCL2L1,PLA2G6,STK24,CAMP,CAPNS1,CALM2,CALM1,CALM3,CACNA1D,SERTAD1,CASP1,CASP2,CASP3,NFKBIA,NFKB1,CDC25C,PPP1CC,PPM1G,PPP1CA,PPM1B,GIMAP5,OXCT2,CHKB,CDKN1A,DTX2,MAP2K2,MAP2K3,MAPK4,MAPK3,MAPK1,PRKACG,PRKCD,SRGN,TNFSF15,PPP6C,PPP2R5A,PPP3R1,PPP2CA,PPP2R1A,DUSP13,BCL2L11,CRKL,CRK,KIF27,CREB1,CTDSP2,Z…
Drug	D015741	Metribolone	CTD	6.5e-05	70	339	ACTB,ACTG1,AKT1,ALDH9A1,ALDOA,ARHGAP1,ATP1A1,CD200,MMP2,B2M,SH3GLB2,OAZ1,BRI3,ODC1,OGDH,BRMS1,UXT,PRDX1,PCMT1,CASC4,NDUFA3,CAPZB,NCOA1,MAPK3,MAPK1,AP2M1,CREB1,CTNNB1,CTSB,C1orf116,CSNK1A1,DDX5,DARS,EAF2,RPL11,RPL3,RPL4,PSMC1,PRDX6,EEF2,ACSL3,FDFT1,JTB,EWSR1,G6PD,XRCC6,RPS6,RPS9,RPS3,FOLH1,RPL24,RPS20,RPS16,GLUL,ABCC4,TACC1,TALDO1,GSPT1,LSM1,GNMT,HSP90AA1,EIF3K,HEXB,VCL,SFXN4,ITGB1,EIF3E,PABPC1,LT…
Drug	D001280	Atrazine	CTD	8e-05	34	116	ACHE,MT2A,AKT1,SEC61A1,NFKB1,CFL1,MAPK3,MAPK1,CYP11A1,RARA,RORA,RPL6,RPL9,RPL19,RPL18A,COMMD5,EEF2,RPS6,RPS13,RPLP2,RPS2,RPS3A,RPL38,RPL24,RPS25,RPS20,RPS19,RPS18,RPS17,GSTP1,HBB,STAR,HPRT1,TUBA1A
Drug	D011441	Propylthiouracil	CTD	0.000185	73	368	ADAM15,ADD1,MBP,APCS,MMP2,ATP6V1A,OGDH,BTG1,BTF3,MYADM,PTTG1IP,CSDA,AKR7A2,CASP3,NEDD8,NME2,ISYNA1,TMBIM1,MAP2K2,AP2M1,CLCN7,CRHR1,ENPP1,COX4I1,CTNNA1,SLC25A3,CSNK2B,SERPINA1,CSK,CSNK1A1,DBI,ATP6V1F,RPL11,RPL17,RPL15,RPL3,RPL4,PSMD4,PSMC1,TAS2R38,PRDX6,PSMB3,PSMB1,PSMA6,PSMA2,ENO1,EIF4A2,ERP29,SERINC3,FDFT1,ETFB,PQLC1,RPS6,RPS3A,RPL32,RPL35A,RPS20,RPS14,RPS19,RPS18,GNB2L1,GAPDH,PRDX2,HBB,GPX1,GPX…
Drug	C025643	vinclozolin	CTD	0.000187	188	1250	ACTB,MSN,ADAM8,ADD1,DNAL1,NKAIN3,ALDH9A1,ALAS2,CFLAR,ALOX5AP,MAP1B,MBP,MTPN,TRIM23,MCL1,AQP9,LRRFIP1,ARHGAP1,ARHGDIB,ATP1A1,ATG12,ATP6V1B2,ATP6V1A,BCR,ODC1,GIGYF1,NIPBL,TAGLN2,PRDX1,MYADM,TSPO,CSDA,SLC44A2,MYH9,CAV2,CASP1,RTN4,NFKBIA,NFKB1,VAMP8,CCND3,CDH11,TRAK2,NOTCH1,PPP1CA,GIMAP5,CHD4,CDKN1A,CEBPB,DAZAP2,MAP2K3,MAPK3,MAPK1,SRGN,MVP,PPP3R1,OSGEPL1,PPP2R1A,CLDN18,ROD1,ACTR2,KLF6,CTNNB1,ACTR1A,M…
Drug	CID000005040	rapamycin	Stitch	0.000426	128	784	ACTB,ACTG1,AKT1,SQSTM1,EIF4ENIF1,CFLAR,ALPP,ALPL,ASH2L,INTS6,CNNM1,BIRC2,ARAF,MCL1,ATG12,MMP2,BCL2L1,ULK1,MYH9,DENR,CASP1,CASP3,EIF3D,EIF3F,EIF3G,EIF3H,EIF3B,NFKBIA,NFKB1,CCND3,CDK4,CDC25C,EIF4A3,EVL,PPID,GFRA4,CDKN1A,MAP2K2,MAP2K3,MAPK4,MAPK3,MAPK1,PRKCD,PPP6C,PPP2R5A,PPP3R1,PPP2CA,PPP2R1A,BCL2L11,CRKL,CRK,CREB1,SPG21,PLEK,CSF2RA,CSF1R,PIK3CD,EIF1,CSF3R,PPP2R2D,EHMT1,PSMD4,PSMB8,ATP8A2,PSMB10,RO…
Drug	D002994	Clofibrate	CTD	0.000464	73	376	ACLY,MPP1,ADAM15,ADD1,AHR,SLC25A5,APCS,ATP6V1A,ODC1,OGDH,BTF3,MYADM,PTTG1IP,AKR7A2,CASP3,CAT,NFKB1,NME2,ISYNA1,TMBIM1,MAP2K2,AP2M1,NFKBIZ,ENPP1,COX4I1,CTNNA1,SLC25A3,CSNK2B,SERPINA1,CSNK1D,DBI,ATP6V1F,RPL11,RPL17,RPL15,RPL3,RPL4,PSMD4,PSMC1,PRDX6,PSMB4,PSMB3,PSMB1,PSMA6,ENO1,EIF4A2,CCNI,ERP29,SERINC3,FDFT1,ETFB,PQLC1,RPS6,RPS3A,RPL32,RXRA,RPS20,RPS14,RPS19,RPS18,MCRS1,GAPDH,PRDX2,HBB,GPX1,GPX4,GR…
Drug	CID000005102	rotenone	Stitch	0.000486	57	267	MT2A,AKT1,SLC25A5,MDH2,ARHGAP4,ATG12,ATP5B,ATP5I,ODC1,PRDX5,OGDH,CAPNS1,NCF4,NDUFA1,NDUFA3,CASP1,NDUFS3,CASP3,CAT,MAPK3,COX7C,COX8A,COX7A2,COX6C,COX6B1,COX5B,COX4I1,PML,CYBA,ALG12,NDUFS7,COX5A,ATP5J2,SLC18A1,SOD2,SOD1,SNCA,PACSIN2,SDHB,RPS3,NDUFA13,GAPDH,TCIRG1,COQ6,GSTP1,HCRT,HSP90AA1,DNAJB2,NLRP1,HK1,TNRC6A,UQCRFS1,TXN,PABPN1,PPP1R1B,LCP1,UQCRQ
Drug	D004054	Diethylstilbestrol	CTD	0.000786	111	661	ACTB,TNFSF14,ADRA2C,MT2A,AKT1,AHR,ALDOA,GMEB2,ALPL,FXC1,ARHGDIB,DEDD,TMSB10,ATF4,CD200,MMP2,B2M,ATP6V1B2,ATP6V1A,ODC1,BCL2L1,PAFAH1B3,BNIP3L,CAPNS1,CDK10,CASP3,RPL10A,NCOA1,CD14,NFKB1,CDK4,NINJ1,NME2,CDC25C,CD68,PPID,CTSA,HSD17B7,CHRNA3,CDKN1A,CEBPB,MAPK3,MAPK1,PPP2R2B,NFKBIZ,SHISA5,MOBKL2C,ARPC1B,CTNNB1,TOB1,CTSB,ZMAT3,DAD1,ARHGAP15,CYP11A1,RBBP4,DNMT3B,RPL6,RPL8,RPL17,RPL15,GSTO1,PSMB8,PSMB10,P…
Drug	D001554	Benzene	CTD	0.000917	70	361	FBXO3,ACLY,ACTB,AHR,AIF1,ALAS2,KSR1,MTPN,ATF4,ATP5I,BCL2L1,PLA2G6,CALM1,CASP1,CASP2,RTN4,CASP3,CASP4,CAT,NFKBIA,NFKB1,CCND3,CD44,CHKB,CDKN1A,KLF13,SRGN,TMEM66,PPP2R1A,CRK,TSSC4,ZMAT3,PIM1,PIK3CD,EIF1,RGS2,DFFA,EIF4A2,EIF4G2,EEF2,YWHAQ,SON,SFRS5,RPL35,ACOT9,G6PC,CCL5,RPL35A,RPL21,RXRA,RPS24,RPS27A,TNFRSF1A,GSTP1,SULT1A1,HBB,TXNIP,MTX2,GSK3B,DNAJB2,CXCL16,HINT1,IL4R,IFNGR1,TXN,IRF1,IL11RA,IL10,LTB,…
Drug	CID000002505	C2-ceramide	Stitch	0.00172	60	297	ACTB,ACTG1,AKT1,AHR,KSR1,MAP3K1,ARF1,ARHGAP4,ARHGAP1,RHOA,BRI3,BCL2L1,CAPNS1,CALM2,CALM1,CALM3,CASP1,CASP2,CASP3,CASP4,CASP10,NFE2,NFKB1,KIAA0101,CTSA,CDKN1A,MAP2K2,MAP2K3,CCR6,MAPK4,MAPK3,MAPK1,PRKCD,PPT1,PPP2R5A,PPP2CA,PPP2R1A,CLTB,RFWD2,BCL2L11,CRKL,CRK,CREB1,PDCD7,PLEK,ACTR1A,PIK3CD,PPP2R2D,DGUOK,STARD13,FCGR2A,RPS18,CAP1,TNFRSF1A,STAT3,UQCRFS1,IL7R,JUND,ILK,UQCRQ
Drug	D003474	Curcumin	CTD	0.001728	100	587	MSN,AKT1,AHR,CFLAR,ALDOA,ALOX5,DIABLO,MAP3K1,BIRC2,GREM1,MCL1,AATF,ARHGDIB,MFNG,YPEL3,MMP2,ODC1,NUP98,BCL2L1,FZD1,CASP1,CASP2,CASP3,CASP4,CAT,CD14,NFKBIA,NFKB1,CDK4,CDH11,CDC25C,NOTCH1,CD44,RASSF2,CDKN2D,CDKN1A,CEBPB,MAP2K3,MAPK3,MAPK1,PRKCD,PGD,BCL2L11,CREB1,PFKFB4,ARHGAP30,KLF6,CTNNB1,CSF1R,EIF1,CSK,RARA,ECH1,ENO1,EIF4G1,PTPN6,FCGR3A,SOD2,SFRS2,SFRS5,SFRS6,S100A9,S100A8,G6PD,XRCC6,RPS6,FOXO1,RP…
Drug	C059514	resveratrol	CTD	0.001823	97	565	ACTB,AKT1,AHR,CFLAR,MAP1A,DIABLO,BIRC2,MCL1,BUB3,FOXO4,ATP5B,ATP5A1,MMP2,ODC1,BCL2L1,BCL6,PLA2G6,COPS3,NDUFB8,CASP2,CASP3,CAT,CD14,NFKBIA,NFKB1,CDK4,NOTCH1,CDKN1A,CEBPB,MAP2K3,MAPK3,MAPK1,PGK1,BCL2L11,CREB1,PLK1,CTNNB1,PML,PLEK,CSF1R,FLOT1,TNK2,CYP11A1,COX5A,DFFA,E4F1,LITAF,ENO1,RAC1,EIF4A2,PTPRA,SLC9A1,FGL1,SOD2,SOD1,SNCA,SELL,EZH1,G6PC,CCL5,RPS6,RPS6KA1,FOXO1,FOXO3,TIMP1,IRF9,GLUL,GAPDH,TNIP1,A…
Drug	C006632	arsenic trioxide	CTD	0.001992	93	536	RSL1D1,MT2A,MT1X,AKT1,CFLAR,ALOX5AP,AQP9,ATP5A1,MMP2,BCR,BCL2L1,BNIP3L,HIST1H4C,BLZF1,PURG,CAV2,CASP1,CASP2,CAPZB,CARS,CASP3,CASP10,CAT,SIGLEC6,CD14,NFKBIA,NFKB1,CD44,EVL,CDKN1A,CD52,SERTAD2,MAP2K3,MAPK3,MAPK1,CLTB,ROD1,CTNNA1,PML,CYBA,CST3,PDLIM7,RGS2,RARA,RARB,RORA,DNMT3B,RPL17,RPL18A,CYB5R3,DEFA1,PSMB8,ZNF682,TSC22D3,PSMB6,COPS5,WDR82,FGR,SOD1,SFRS5,S100A9,S100A10,S100A8,FYB,CCL15,XRCC6,MAFF,R…
Drug	D013853	Thioacetamide	CTD	0.002488	85	479	ACTB,ADAM15,ADD1,ALPL,ALOX5AP,MAT2A,APCS,MMP2,ATP6V1A,OGDH,BCL2L1,BTF3,MYADM,PTTG1IP,AKR7A2,CASP3,CAT,NFKBIA,CDK4,NME2,ISYNA1,TMBIM1,CEBPB,MAP2K2,AP2M1,ENPP1,COX4I1,CTNNA1,CTSB,EIF1,SLC25A3,CSNK2B,SERPINA1,DAD1,DBI,ATP6V1F,RPL11,RPL17,RPL15,RPL3,RPL4,GSTO1,PSMD4,PSMC1,ATP5J2,PRDX6,PSMB3,PSMB1,PSMA6,ENO1,EIF4A2,SMOX,ACSL3,ERP29,SERINC3,FDFT1,SOD2,SOD1,ETFB,PQLC1,RPS6,RPS3A,RPL32,RPS20,RPS14,RPS19,…
Drug	D001553	Benzbromarone	CTD	0.002651	57	280	ADAM15,ADD1,APCS,ATP6V1A,OGDH,BTF3,MYADM,PTTG1IP,AKR7A2,CASP3,NME2,ISYNA1,TMBIM1,MAP2K2,AP2M1,ENPP1,COX4I1,CTNNA1,SLC25A3,CSNK2B,SERPINA1,DBI,ATP6V1F,RPL11,RPL17,RPL15,RPL3,RPL4,PSMD4,PSMC1,PRDX6,PSMB3,PSMB1,PSMA6,ENO1,EIF4A2,ERP29,SERINC3,FDFT1,ETFB,PQLC1,RPS6,RPS3A,RPL32,RPS20,RPS14,RPS19,RPS18,GAPDH,PRDX2,HBB,GPX1,GPX4,GRINA,HPRT1,CLPTM1L,UBA52
Drug	D005001	Ethionine	CTD	0.003001	57	281	ADAM15,ADD1,APCS,ATP6V1A,OGDH,BTF3,MYADM,PTTG1IP,AKR7A2,CASP3,NME2,ISYNA1,TMBIM1,MAP2K2,AP2M1,ENPP1,COX4I1,CTNNA1,SLC25A3,CSNK2B,SERPINA1,DBI,ATP6V1F,RPL11,RPL17,RPL15,RPL3,RPL4,PSMD4,PSMC1,PRDX6,PSMB3,PSMB1,PSMA6,ENO1,EIF4A2,ERP29,SERINC3,FDFT1,ETFB,PQLC1,RPS6,RPS3A,RPL32,RPS20,RPS14,RPS19,RPS18,GAPDH,PRDX2,HBB,GPX1,GPX4,GRINA,HPRT1,CLPTM1L,UBA52
Drug	D002392	Catechin	CTD	0.003131	25	82	ACTB,AKT1,ARHGAP4,ATF4,BTG1,CASP3,CAT,NFKBIA,CD81,NOTCH1,MAPK3,MAPK1,RARB,RPL6,DFFA,RAC1,SOD2,EWSR1,SULT1A1,STAT5B,HOXD3,ITGB2,ITGAL,IL10,LYN
Drug	CID000025959	ferricyanide	Stitch	0.005914	38	161	ACHE,MDH2,ARHGAP4,PRDX5,CALM2,CALM1,CALM3,NDUFA1,NDUFS3,CAT,PRCP,COX7C,COX8A,BCL2L11,COX7A2,COX6C,COX6B1,COX5B,COX4I1,COX5A,CYB5R3,PRDX6,RAC2,SOD2,SOD1,SDHB,FTL,G6PD,G6PC,TKT,GAPDH,TCIRG1,COQ6,HBQ1,HBG2,HBA2,HBB,NT5C
Drug	D009853	Omeprazole	CTD	0.006277	59	301	ADAM15,ADD1,AHR,APCS,MMP2,ATP6V1A,OGDH,BTF3,MYADM,PTTG1IP,AKR7A2,CASP3,NME2,ISYNA1,TMBIM1,MAP2K2,AP2M1,ENPP1,COX4I1,CTNNA1,SLC25A3,CSNK2B,SERPINA1,DBI,ATP6V1F,RPL11,RPL17,RPL15,RPL3,RPL4,PSMD4,PSMC1,PRDX6,PSMB3,PSMB1,PSMA6,ENO1,EIF4A2,ERP29,SERINC3,FDFT1,ETFB,PQLC1,RPS6,RPS3A,RPL32,RPS20,RPS14,RPS19,RPS18,GAPDH,PRDX2,HBB,GPX1,GPX4,GRINA,HPRT1,CLPTM1L,UBA52
Drug	D010269	Paraquat	CTD	0.006881	77	431	ACHE,ADAR,MT2A,AES,AKT1,SQSTM1,DIABLO,ARF1,ARF5,MGAT1,ATP1A1,ODC1,BCL2L1,PRDX1,MYL6,CASP1,CASP3,CAT,NFKBIA,NFKB1,CCND3,CDKN1A,CEBPB,CFL1,MAP2K3,MAPK3,MAPK1,CCS,CLK3,COX7A2,CREB1,PFKFB4,COX5B,COX4I1,CTSB,PLCG2,CSF1R,DBI,DMD,GSTO1,TSC22D3,PRDX6,ENO1,RAC2,SERINC3,SOD2,SOD1,SNCA,SHC1,FTL,G6PD,RPN1,RXRA,TGFBR2,TKT,TIMP1,GNAS,GAPDH,ABCC4,PRDX2,GSTP1,HBB,TXNIP,GPX1,GPX4,SRP54,STAT3,GRIN1,LSM1,HPCAL1,YWH…
Drug	D006861	Hydrogen Peroxide	CTD	0.008244	82	470	ACTB,ADM,MT2A,MT1X,AKT1,SQSTM1,CFLAR,ALOX5AP,MGAT1,ATF4,MMP2,ODC1,PRDX5,OGDH,BCL2L1,PRDX1,HIST1H4C,CAPNS1,CALM1,CDK10,CASP1,CASP3,CAT,NFKBIA,NFKB1,CDH11,CDC25C,CD68,CDKN2D,CDKN1A,CD52,MAPK3,MAPK1,PRKCD,CCS,CRHR1,CTNNA1,PLK1,CTNNB1,PSMD12,PRDX6,RAC2,FECH,FDFT1,FCGR3B,SLC9A1,SOD2,SOD1,SNCA,SHC1,F2R,PPP1R15A,FTL,G6PD,FOXO1,RPS9,UBE2C,TUBA1B,TNFRSF1A,GNAS,GNB1,GAPDH,PRDX2,GTF2B,GSTP1,HDAC1,GPX1,GPX4,…
Drug	CID000024288	cobalt chloride	Stitch	0.010951	35	146	ADM,CACNA1H,AHR,ALAS2,GSTK1,CALM2,CALM1,CALM3,CASP3,CAT,NFKBIA,CD44,MAPK3,MAPK1,CNN2,SRGN,PRCP,CPM,PFKFB4,COX4I1,CYBA,CYP11A1,RBMS1,RORA,COX5A,GSTO1,RNF7,EPAS1,SOD2,G6PC,RAMP2,GSTP1,VHL,EGLN2,PPA2
Drug	CID000005311	suberoylanilide hydroxamic acid	Stitch	0.012254	60	314	AKT1,CFLAR,DIABLO,APCS,BIRC2,MCL1,BCR,BCL2L1,HIST1H4C,RUNX3,CASP1,CASP2,CASP3,NCOA1,NFKBIA,NFKB1,CDKN1A,MAPK3,MAPK1,BCL2L11,PHF21A,PML,H2AFJ,RPA2,SNCA,SFRS2,PACSIN2,S100A4,S100A6,CCNDBP1,XRCC6,RPS3,TGM2,TNFRSF1A,GAPDH,TCIRG1,TXNIP,HDAC1,HCRT,H3F3A,H2AFZ,TAZ,TAP1,LAMA1,STAT2,HSPA8,HSP90AA1,DNAJB2,HPRT1,VHL,TXN,TTR,PABPN1,IRF7,PPP1R1B,MYST1,MYST3,LRCH4,TUBA1A,EIF2AK1
Drug	C058317	arsenic disulfide	CTD	0.012688	18	51	BCR,BTG1,IFITM1,OGT,CASP3,EVL,ZFYVE16,PRCP,RGS2,RPL17,SORL1,RPS27A,TGFBR2,TXNIP,ATG7,ARHGEF18,ITGB1,PRDM2
Drug	D012402	Rotenone	CTD	0.012942	89	528	ZNF787,ADAR,MT2A,AKT1,SQSTM1,RAB8A,MDH2,ARHGDIG,RPL7L1,ATF4,ATP5I,ATP5J,ODC1,NIPBL,PLSCR3,STK24,FZD1,UBN1,NACA,NDUFA3,NDUFA4,NDUFB3,NDUFB2,NDUFB8,NDUFB6,CASP3,CASP4,CAT,CD14,NFKBIA,NFKB1,PINK1,CD68,PPID,CDKN1A,CEBPB,MAPK3,MAPK1,CIRBP,PPP2R2B,CYB5R1,COX7C,COX7A2,ENPP1,ARPC2,COX5B,COX4I1,RASGRP2,FOXJ2,COX5A,GSTO1,EPAS1,SLC6A8,SOD2,SOD1,SNCA,ZMYND11,PPP1R15A,G6PC,RPS2,RPS3,NDUFB11,SH3BP5L,TLN1,ANAPC…
Drug	C016614	1-nitronaphthalene	CTD	0.014859	11	21	ACTB,ACTG1,MYL6,CLIC1,ENO1,TGM2,PRDX2,GSTP1,SULT1A1,HBB,TUBA1A
Drug	CID000000878	methanethiol	Stitch	0.016788	29	112	MAT2A,ATF4,ATP6AP1,CAT,NME2,DTX2,FSD1,COX7C,COX8A,COX7A2,COX6C,COX6B1,COX5B,COX4I1,COX5A,DTNB,FCAR,FCER1G,FCGRT,FCGR3B,FCGR3A,FCGR2A,LILRB3,ZNF238,TPI1,GYPC,MAT2B,KPNB1,STK38
Drug	C019499	2-nitrofluorene	CTD	0.018865	34	143	MT2A,AIF1,FXC1,TMSB10,ODC1,RPL10A,CDK4,CDKN1A,ARPC1B,ATP6V1D,ZMAT3,RPL6,RPL8,RPL17,RPL15,CYB5R3,PSMB8,PSMC1,PSMB4,PSMB3,PSMB1,PSMA2,EEF2,RPS3,RPS24,RPS15A,RPS19,TIMP1,H2AFZ,TAP1,GNMT,VIM,IRF1,RPSA
Drug	CID000119058	ubiquinone	Stitch	0.020741	49	242	NDUFA11,NFS1,MDH2,ARHGAP4,ATP5B,OGDH,DPP7,NDUFA1,NDUFA3,NDUFA4,NDUFB3,NDUFB2,NDUFB8,NDUFB6,NDUFS3,CAT,GDE1,LIPT1,CLK1,COX6C,CYBA,RBM5,DARS,NDUFS7,RPL19,GSTO1,CAB39,RAC2,FDFT1,SLC11A1,ABTB1,SOD2,SOD1,CPSF4,FKBP3,RAB10,ETFB,SDHB,G6PD,RPS9,MRPS12,NDUFB11,NDUFA13,TCIRG1,COQ6,GSK3B,UQCRFS1,hCG_25371,UQCRQ
Drug	CID000000994	L-phenylalanine	Stitch	0.023014	44	209	ACHE,ALPP,ALPL,ATP6V1E1,KCMF1,CAPZA2,NDUFS3,CAT,STX10,MAPK3,MAPK1,IARS2,HIPK3,SLC25A3,PYCARD,RPL9,RPL8,RPL15,RPL19,RPL3,RPL4,RPL5,EEF1A1,ARID4B,PRDX6,EPAS1,EEF2,FGA,RPL37A,RPL39,RPL41,RPLP0,RPL24,TKT,TCEB2,GAK,HCRT,TAP1,VHL,KPNB1,CTRC,EGLN2,LNPEP,GFM2
Drug	CID000000619	ribulose	Stitch	0.024901	22	74	FBXO3,ALDOA,MDH2,OGDH,MCOLN1,PGD,RALGDS,RPL12,RPE,SORD,G6PD,RPS14,RPS18,TKT,GLUL,GAPDH,COQ6,TALDO1,HPS1,MSRB2,UQCRFS1,CXXC1
Drug	D002713	Chlorine	CTD	0.028599	60	322	ADRA2C,AKT1,MAX,ARF1,ARF5,GSTK1,ATP1A1,ATP6V0C,ODC1,CASP3,NFKBIA,CCND3,CDK4,NME2,CD44,CDKN1A,CFL1,MAPK3,MAPK1,MVP,PPP2CA,CRK,PFKFB4,CTSB,CSF1R,CYP11A1,RALGDS,RPL11,RPL12,PSMB8,PSMC1,PSMB6,PSMB4,PSMB3,PSMA2,EEF2,PTPRR,SLC18A1,FGR,RPS12,RPS11,RPL36AL,RPL21,RPS29,RPS19,RPS17,TIMP1,GNAS,GNB1,GNAI2,GAPDH,PRDX2,YWHAH,YWHAZ,VHL,SLC14A2,ITGB1,IL18,LYN,TUBA1A
Drug	CID000004813	piceatannol	Stitch	0.036051	42	199	AKT1,MAP3K1,APCS,ZC3HAV1,RHOA,ATP5B,ATP5A1,BCKDHA,CASP3,NFKBIA,NFKB1,MAP2K2,MAP2K3,MAPK3,MAPK1,PRKCD,PLEK,PLCG2,PIK3CD,CSK,RAC1,FCER1G,FCGR3B,FCGR3A,FCGR2A,FGR,HCST,S100A9,HCLS1,STAT3,STAT2,STAT5A,IL4R,TYK2,TYROBP,IFNAR1,ICAM3,ITGB1,ITGB2,LYN,RPSA,LAT
Drug	CID000002021	spectinomycin	Stitch	0.038615	24	87	CAT,SUMF2,PRCP,LRRC15,RPL11,RPL19,RPL3,RPL4,SOD2,RPS5,RPS12,RPS10,MRPS12,RPS2,RPS3,RPL32,RPL24,RPS14,RPS15A,RPS17,STRN,ST5,INPP5F,GFM2
Drug	CID000006331	trideuterioborane	Stitch	0.04295	52	269	RASSF5,AKT1,AHR,CFLAR,PIAS2,DIABLO,MAP3K1,MCL1,ZBED1,ATP6V1E1,BCR,BCL2L1,PRDX1,BNIP3L,TSPO,CAPNS1,C1orf128,CASP1,CASP2,CASP3,CASP4,CASP10,CDKN1A,CCR6,MAPK3,COX8A,BCL2L11,SHISA5,BCAP31,CTSB,PYCARD,DFFA,E4F1,ELF4,MAP4K2,RPS6KA1,FOXO3,BCL2L13,RPLP0,TGM2,TNFRSF1A,SH3GLB1,GAS1,ATG7,HSPA8,VDAC3,IL7R,UBC,UBE2D3,RHOQ,TRAM1,USP7
Drug	D011794	Quercetin	CTD	0.043351	111	716	ACAA1,ACHE,ACLY,ACTB,ADAM15,MT2A,AKT1,AHR,AIF1,CDC16,CFLAR,ALDOA,SLC25A5,GSTK1,ARHGDIB,SLC16A3,MMP2,ATP6V0B,BCR,ODC1,BCL2L1,TAGLN2,PRDX1,HIST1H2AC,DENR,MYO1A,NDUFA4,CAV2,CASP1,CASP3,CAT,NEDD8,NCOA1,NFE2,NFKBIA,NFKB1,CCND3,CDK4,CDH11,CDC25C,CDKN1A,CEBPB,CEBPD,CFL1,PJA2,MAPK3,MAPK1,PRKCD,PGK1,PFN1,CREB1,CTNNA1,PLK1,CTNNB1,DARS,RARB,RBMS1,DEFA1,ECH1,PTGFRN,E2F2,ATP5J2,TSC22D3,PRDX6,EPAS1,ENO1,EMP3,E…
Drug	D019256	Cadmium Chloride	CTD	0.047745	53	277	ACAA1,ACHE,MT2A,MT1X,AKT1,BIRC2,MCL1,TMSB10,ATP1A1,ATF4,B2M,GTPBP6,PRDX1,HIST1H2AC,CASP3,CASP10,CAT,NFKBIA,CDKN1A,CFL1,MAPK4,MAPK3,MAPK1,SERPINA1,CYP11A1,RARRES3,EEF1A1,PRDX6,SLC9A1,SOD2,SOD1,SFRS2,SLC2A3,G6PD,G6PC,RPS19,TMSB4X,GLUL,GAPDH,GSTP1,HBB,IFITM2,GPX1,STAR,STAT3,HSPA8,HSP90AA1,VIM,IGF2R,TXN,HSP90B1,ILK,VEZF1
GENE ONTOLOGY CATEGORIES
GO: Molecular Function	GO:0003735	structural constituent of ribosome		0	64	162	RSL1D1,RPL7L1,RPL36,RPL10A,MRPS6,RPL6,RPL9,RPL8,RPL11,RPL12,RPL17,RPL15,RPL18,RPL19,RPL18A,RPL3,RPL4,RPL5,MRPL33,FAU,RPL35,RPS6,RPS5,RPS9,RPS12,RPS13,RPS10,RPS11,RPLP1,MRPS12,RPLP2,RPS2,RPS3A,RPS3,RPL31,RPL32,RPL35A,RPL36AL,RPL37A,RPL38,RPL39,RPL41,RPLP0,RPL21,RPL24,RPL27,RPL27A,RPL30,RPS24,RPS25,RPS20,RPS27,RPS27A,RPS28,RPS29,RPS15,RPS14,RPS15A,RPS19,RPS18,RPS16,RPS17,UBA52,RPSA
GO: Molecular Function	GO:0003723	RNA binding		0	144	766	UPF3B,ADAR,RSL1D1,LRRFIP1,ZC3HAV1,SFRS17A,RBM10,LARP4,PCBP1,PCBP2,CSDA,THOC5,PRKRA,UPF2,RAE1,CARS,PNPT1,EIF3G,EIF3B,RPL10A,SFRS9,MRPS6,RNASET2,EIF4A3,SART3,CIRBP,RBM38,LSM7,PAIP2,ROD1,RBM22,ZMAT3,RBM5,SECISBP2,DDX5,DDX3X,RARA,DIS3L2,RBMS1,RPL6,RPL9,RPL8,RPL11,RPL12,RPL15,RPL18,RPL19,RPL18A,RPL3,RPL4,RPL5,PTBP1,PSMA6,QARS,ELAVL3,EIF4A1,EIF4A2,EIF4B,EIF4G1,KIAA0430,PUM1,DHX34,FAU,FECH,SNRPB,SON,PAP…
GO: Molecular Function	GO:0015078	hydrogen ion transmembrane transporter activity		0	36	100	ATP6V0E1,ATP6V0D1,ATP5B,ATP5A1,ATP5G2,ATP5F1,ATP6V1B2,ATP6V0C,ATP5I,ATP5J,ATP6V1A,ATP6V0B,ATP6V0A1,ATP6V1E1,ATP6AP1,COX7C,COX8A,COX7A2,COX6C,COX6B1,COX5B,COX4I1,ATP6V1D,ATP6V1F,COX5A,ATP6V1G1,ATP5J2,SLC9A1,ATP5H,TCIRG1,SLC9A4,ATP5L,ATP5EP2,UQCRFS1,hCG_25371,UQCRQ
GO: Molecular Function	GO:0015077	monovalent inorganic cation transmembrane transporter activity		0	37	115	ATP6V0E1,ATP1A1,ATP6V0D1,ATP5B,ATP5A1,ATP5G2,ATP5F1,ATP6V1B2,ATP6V0C,ATP5I,ATP5J,ATP6V1A,ATP6V0B,ATP6V0A1,ATP6V1E1,ATP6AP1,COX7C,COX8A,COX7A2,COX6C,COX6B1,COX5B,COX4I1,ATP6V1D,ATP6V1F,COX5A,ATP6V1G1,ATP5J2,SLC9A1,ATP5H,TCIRG1,SLC9A4,ATP5L,ATP5EP2,UQCRFS1,hCG_25371,UQCRQ
GO: Molecular Function	GO:0005198	structural molecule activity		0	109	635	ACTB,ACTG1,MSN,ADD1,RSL1D1,MUC6,MAP1B,MAP1A,MBP,RPL7L1,NUP98,MYL6,MYL4,EIF3B,RPL36,RPL10A,MRPS6,CLTB,CLDN18,ARPC2,ARPC3,ARPC1B,ARPC5,CTNNA1,CRYGA,DKFZp686O24166,CYLC1,CYLC2,ERBB2IP,RPL6,RPL9,RPL8,RPL11,RPL12,RPL17,RPL15,RPL18,RPL19,RPL18A,RPL3,DMD,RPL4,RPL5,ROCK2,MRPL33,FAU,DCTN3,RPL35,CLDN14,RPS6,RPS5,RPS9,RPS12,RPS13,RPS10,RPS11,RPLP1,MRPS12,RPLP2,RPS2,RPS3A,RPS3,RPL31,RPL32,RPL35A,RPL36AL,RPL3…
GO: Molecular Function	GO:0045182	translation regulator activity		0	40	144	ABCF1,EIF4ENIF1,AIRE,PCBP1,DENR,EIF3D,EIF3F,EIF3G,EIF3H,EIF3B,EIF4A3,CIRBP,PAIP2,EIF1,RARA,EEF1A1,EEF1E1,EIF4A1,EIF4A2,EIF4B,EIF4G1,EIF4G2,EEF2,EEF1B2,COPS5,MTRF1L,ABTB1,EIF5AL1,RPS9,RPS14,EIF2C3,GTF2B,PAIP1,GSPT1,EIF2C2,EIF3K,EIF3E,PABPC1,GFM2,EIF2AK1
GO: Molecular Function	GO:0008135	translation factor activity, nucleic acid binding		0	36	122	ABCF1,EIF4ENIF1,PCBP1,DENR,EIF3D,EIF3F,EIF3G,EIF3H,EIF3B,EIF4A3,PAIP2,EIF1,RARA,EEF1A1,EEF1E1,EIF4A1,EIF4A2,EIF4B,EIF4G1,EIF4G2,EEF2,EEF1B2,COPS5,MTRF1L,ABTB1,EIF5AL1,EIF2C3,GTF2B,PAIP1,GSPT1,EIF2C2,EIF3K,EIF3E,PABPC1,GFM2,EIF2AK1
GO: Molecular Function	GO:0022890	inorganic cation transmembrane transporter activity		4e-06	42	172	ATP6V0E1,ATP1A1,ATP6V0D1,ATP5B,ATP5A1,ATP5G2,ATP5F1,ATP6V1B2,ATP6V0C,ATP5I,ATP5J,ATP6V1A,ATP6V0B,ATP6V0A1,ATP6V1E1,ATP6AP1,CCS,COX7C,COX8A,COX7A2,COX6C,COX6B1,COX5B,SLC25A37,COX4I1,ATP6V1D,ATP6V1F,COX5A,ATP6V1G1,ATP5J2,SLC11A1,SLC9A1,SNCA,ATP5H,TCIRG1,SLC9A4,ATP5L,ATP5EP2,UQCRFS1,hCG_25371,UQCRQ,SLC30A3
GO: Molecular Function	GO:0003743	translation initiation factor activity		6.8e-05	22	66	EIF4ENIF1,DENR,EIF3D,EIF3F,EIF3G,EIF3H,EIF3B,EIF4A3,EIF1,EIF4A1,EIF4A2,EIF4B,EIF4G1,EIF4G2,COPS5,EIF5AL1,EIF2C3,GTF2B,EIF2C2,EIF3K,EIF3E,EIF2AK1
GO: Molecular Function	GO:0046961	proton-transporting ATPase activity, rotational mechanism		0.000415	11	20	ATP6V0E1,ATP5B,ATP5A1,ATP6V1B2,ATP6V0C,ATP6V1A,ATP6V1E1,ATP6AP1,ATP6V1D,ATP6V1F,ATP5EP2
GO: Biological Process	GO:0006414	translational elongation		0	65	109	RPL36,RPL10A,RPL6,RPL9,RPL8,RPL11,RPL12,RPL17,RPL15,RPL18,RPL19,RPL18A,RPL3,RPL4,RPL5,EEF1A1,EEF2,EEF1B2,FAU,EIF5AL1,RPL35,RPS6,RPS5,RPS9,RPS12,RPS13,RPS10,RPS11,RPLP1,RPLP2,RPS2,RPS3A,RPS3,RPL31,RPL32,RPL35A,RPL37A,RPL38,RPL39,RPL41,RPLP0,RPL21,RPL24,RPL27,RPL27A,RPL30,RPS24,RPS25,RPS20,RPS27,RPS27A,RPS28,RPS29,RPS15,RPS14,RPS15A,RPS19,RPS18,RPS16,RPS17,SRP14,VARS,UBA52,GFM2,RPSA
GO: Biological Process	GO:0006412	translation		0	127	434	ABCF1,RSL1D1,AKT1,MTPN,RPL7L1,DENR,NACA,LSM14A,CARS,EIF3D,EIF3F,EIF3G,EIF3H,EIF3B,RPL36,RPL10A,CDK4,MRPS6,EIF4A3,PPP1CA,MAPK3,MAPK1,CIRBP,PAIP2,IARS2,EIF1,SECISBP2,DARS,RARA,RPL6,RPL9,RPL8,RPL11,RPL12,RPL17,RPL15,RPL18,RPL19,RPL18A,RPL3,RPL4,RPL5,EEF1A1,EEF1E1,MRPL33,QARS,EIF4A1,EIF4A2,EIF4B,EIF4G1,EIF4G2,EEF2,PUM1,EEF1B2,FAU,COPS5,MTRF1L,FECH,ABTB1,FAM129A,EIF5AL1,ATXN2,PPP1R15A,RPL35,RPS6,RPS5,…
GO: Biological Process	GO:0012501	programmed cell death		0	210	1279	ABR,TNFSF14,ACTN1,TNFRSF14,ADAR,RASSF5,ADM,BCL10,AKT1,SQSTM1,AHR,AIF1,TAX1BP1,CFLAR,UBE2M,DIABLO,MAP3K1,BIRC2,GREM1,MCL1,AATF,ARHGAP4,RHOA,DEDD,ARHGEF2,YPEL3,MMP2,PROK2,B2M,DUSP22,PRDX5,BCL2L1,BCL6,SH3KBP1,BTG1,PRDX1,FURIN,BNIP3L,TSPO,CSDA,IKBKG,PRKRA,RUNX3,CASP1,NDUFS3,CASP2,RTN4,CASP3,CASP4,CASP10,CAT,CD14,NFKBIA,NFKB1,CDK4,NME2,NOTCH1,CD44,BCLAF1,GIMAP5,KCNH8,CDKN2D,CDKN1A,CEBPB,CFL1,MAPK1,PRK…
GO: Biological Process	GO:0008219	cell death		0	222	1385	ABR,TNFSF14,ACTN1,TNFRSF14,ADAR,RASSF5,ADM,BCL10,AKT1,SQSTM1,AHR,AIF1,TAX1BP1,CFLAR,UBE2M,DIABLO,MAP3K1,BIRC2,GREM1,MCL1,AATF,ARHGAP4,RHOA,DEDD,ARHGEF2,YPEL3,MMP2,PROK2,B2M,DUSP22,ATP6AP1,PRDX5,BCL2L1,BCL6,PLA2G6,SH3KBP1,BTG1,PRDX1,FURIN,BNIP3L,TSPO,CSDA,IKBKG,PRKRA,RUNX3,CASP1,NDUFS3,CASP2,RTN4,CASP3,CASP4,CASP10,CAT,CD14,NFKBIA,NFKB1,CDK4,NME2,NOTCH1,CD44,BCLAF1,GIMAP5,KCNH8,CDKN2D,CDKN1A,CEBPB…
GO: Biological Process	GO:0043067	regulation of programmed cell death		0	175	1006	ABR,TNFSF14,ACTN1,ADAR,ADM,BCL10,AKT1,SQSTM1,AIF1,TAX1BP1,CFLAR,UBE2M,DIABLO,MAP3K1,BIRC2,MCL1,AATF,ARHGAP4,RHOA,DEDD,ARHGEF2,MMP2,PROK2,B2M,PRDX5,BCL2L1,BCL6,BTG1,PRDX1,FURIN,BNIP3L,CSDA,IKBKG,PRKRA,RUNX3,CASP1,NDUFS3,CASP2,RTN4,CASP3,CASP4,CASP10,CAT,NFKBIA,NFKB1,CDK4,NME2,NOTCH1,CD44,BCLAF1,GIMAP5,KCNH8,CDKN2D,CDKN1A,CEBPB,CFL1,MAPK1,PRKCD,TNFSF15,PPT1,PPP2R2B,PPP3R1,PPP3CB,PPP2CA,PPP2R1A,BCL2…
GO: Biological Process	GO:0006915	apoptosis		0	207	1265	ABR,TNFSF14,ACTN1,TNFRSF14,ADAR,RASSF5,ADM,BCL10,AKT1,SQSTM1,AHR,AIF1,TAX1BP1,CFLAR,UBE2M,DIABLO,MAP3K1,BIRC2,GREM1,MCL1,AATF,ARHGAP4,RHOA,DEDD,ARHGEF2,YPEL3,MMP2,PROK2,B2M,DUSP22,PRDX5,BCL2L1,BCL6,SH3KBP1,BTG1,PRDX1,FURIN,BNIP3L,TSPO,CSDA,IKBKG,PRKRA,RUNX3,CASP1,NDUFS3,CASP2,RTN4,CASP3,CASP4,CASP10,CAT,CD14,NFKBIA,NFKB1,CDK4,NME2,NOTCH1,CD44,BCLAF1,GIMAP5,KCNH8,CDKN2D,CDKN1A,CEBPB,CFL1,MAPK1,PRK…
GO: Biological Process	GO:0016265	death		0	222	1390	ABR,TNFSF14,ACTN1,TNFRSF14,ADAR,RASSF5,ADM,BCL10,AKT1,SQSTM1,AHR,AIF1,TAX1BP1,CFLAR,UBE2M,DIABLO,MAP3K1,BIRC2,GREM1,MCL1,AATF,ARHGAP4,RHOA,DEDD,ARHGEF2,YPEL3,MMP2,PROK2,B2M,DUSP22,ATP6AP1,PRDX5,BCL2L1,BCL6,PLA2G6,SH3KBP1,BTG1,PRDX1,FURIN,BNIP3L,TSPO,CSDA,IKBKG,PRKRA,RUNX3,CASP1,NDUFS3,CASP2,RTN4,CASP3,CASP4,CASP10,CAT,CD14,NFKBIA,NFKB1,CDK4,NME2,NOTCH1,CD44,BCLAF1,GIMAP5,KCNH8,CDKN2D,CDKN1A,CEBPB…
GO: Biological Process	GO:0010941	regulation of cell death		0	176	1017	ABR,TNFSF14,ACTN1,ADAR,ADM,BCL10,AKT1,SQSTM1,AIF1,TAX1BP1,CFLAR,UBE2M,DIABLO,MAP3K1,BIRC2,MCL1,AATF,ARHGAP4,RHOA,DEDD,ARHGEF2,MMP2,PROK2,B2M,PRDX5,BCL2L1,BCL6,BTG1,PRDX1,FURIN,BNIP3L,CSDA,IKBKG,PRKRA,RUNX3,CASP1,NDUFS3,CASP2,RTN4,CASP3,CASP4,CASP10,CAT,NFKBIA,NFKB1,CDK4,NME2,NOTCH1,CD44,BCLAF1,GIMAP5,KCNH8,CDKN2D,CDKN1A,CEBPB,CFL1,MAPK1,PRKCD,TNFSF15,PPT1,PPP2R2B,PPP3R1,PPP3CB,PPP2CA,PPP2R1A,BCL2…
GO: Biological Process	GO:0042981	regulation of apoptosis		0	173	994	ABR,TNFSF14,ACTN1,ADAR,ADM,BCL10,AKT1,SQSTM1,AIF1,TAX1BP1,CFLAR,UBE2M,DIABLO,MAP3K1,BIRC2,MCL1,AATF,ARHGAP4,RHOA,DEDD,ARHGEF2,MMP2,PROK2,B2M,PRDX5,BCL2L1,BCL6,BTG1,PRDX1,FURIN,BNIP3L,CSDA,IKBKG,PRKRA,RUNX3,CASP1,NDUFS3,CASP2,RTN4,CASP3,CASP4,CASP10,CAT,NFKBIA,NFKB1,CDK4,NME2,NOTCH1,CD44,BCLAF1,GIMAP5,KCNH8,CDKN2D,CDKN1A,CEBPB,CFL1,MAPK1,PRKCD,TNFSF15,PPT1,PPP2R2B,PPP3R1,PPP3CB,PPP2CA,PPP2R1A,BCL2…
GO: Biological Process	GO:0051094	positive regulation of developmental process		0	148	867	ABR,ACHE,TNFSF14,BCL10,AKT1,SQSTM1,CFLAR,MAP1B,PIAS2,UBE2M,DIABLO,MAP3K1,AATF,ARHGAP4,RHOA,DEDD,ARHGEF2,MMP2,B2M,NIPBL,BCL2L1,BCL6,BTG1,PRDX1,BNIP3L,CAMP,IKBKG,PRKRA,RUNX3,CASP1,NDUFS3,CASP2,RTN4,CASP3,CASP4,CASP10,NUMB,NFKB1,CDK4,NME2,NOTCH1,CD44,BCLAF1,GIMAP5,CDKN1A,CEBPB,SEC16A,MAPK1,PRKCD,PPP2R2B,PPP3R1,PPP3CB,PPP2CA,PPP2R1A,BCL2L11,SHISA5,PDCD7,CTNNB1,PML,FEM1B,ZMAT3,CSF1R,RBM5,PDLIM7,EAF2,R…
GO: Biological Process	GO:0043065	positive regulation of apoptosis		0	102	517	ABR,TNFSF14,BCL10,AKT1,SQSTM1,CFLAR,UBE2M,DIABLO,MAP3K1,AATF,ARHGAP4,RHOA,DEDD,ARHGEF2,MMP2,B2M,BCL2L1,BCL6,PRDX1,BNIP3L,IKBKG,PRKRA,RUNX3,CASP1,NDUFS3,CASP2,CASP3,CASP4,CASP10,CDK4,NOTCH1,CD44,BCLAF1,GIMAP5,CDKN1A,CEBPB,MAPK1,PRKCD,PPP2R2B,PPP3R1,PPP3CB,PPP2CA,PPP2R1A,BCL2L11,SHISA5,PDCD7,CTNNB1,PML,FEM1B,ZMAT3,RBM5,EAF2,RARB,PYCARD,RPL11,ITM2B,DFFA,ARHGEF6,EEF1E1,ZAK,RNF7,RAC1,PTPN6,PVRL2,ARHGE…
GO: Biological Process	GO:0010942	positive regulation of cell death		0	103	527	ABR,TNFSF14,BCL10,AKT1,SQSTM1,CFLAR,UBE2M,DIABLO,MAP3K1,AATF,ARHGAP4,RHOA,DEDD,ARHGEF2,MMP2,B2M,BCL2L1,BCL6,PRDX1,BNIP3L,IKBKG,PRKRA,RUNX3,CASP1,NDUFS3,CASP2,CASP3,CASP4,CASP10,CDK4,NOTCH1,CD44,BCLAF1,GIMAP5,CDKN1A,CEBPB,MAPK1,PRKCD,PPP2R2B,PPP3R1,PPP3CB,PPP2CA,PPP2R1A,BCL2L11,SHISA5,PDCD7,CTNNB1,PML,FEM1B,ZMAT3,RBM5,EAF2,RARB,PYCARD,RPL11,ITM2B,DFFA,ARHGEF6,EEF1E1,ZAK,RNF7,RAC1,PTPN6,PVRL2,ARHGE…
GO: Biological Process	GO:0043068	positive regulation of programmed cell death		0	102	520	ABR,TNFSF14,BCL10,AKT1,SQSTM1,CFLAR,UBE2M,DIABLO,MAP3K1,AATF,ARHGAP4,RHOA,DEDD,ARHGEF2,MMP2,B2M,BCL2L1,BCL6,PRDX1,BNIP3L,IKBKG,PRKRA,RUNX3,CASP1,NDUFS3,CASP2,CASP3,CASP4,CASP10,CDK4,NOTCH1,CD44,BCLAF1,GIMAP5,CDKN1A,CEBPB,MAPK1,PRKCD,PPP2R2B,PPP3R1,PPP3CB,PPP2CA,PPP2R1A,BCL2L11,SHISA5,PDCD7,CTNNB1,PML,FEM1B,ZMAT3,RBM5,EAF2,RARB,PYCARD,RPL11,ITM2B,DFFA,ARHGEF6,EEF1E1,ZAK,RNF7,RAC1,PTPN6,PVRL2,ARHGE…
GO: Biological Process	GO:0043933	macromolecular complex subunit organization		0	171	1060	FERMT3,ACHE,ADD1,ADSL,BCL10,SQSTM1,AHR,ALOX5AP,MAP1B,MAP1A,MAX,NFS1,MAP3K1,APCS,BIRC2,RHOA,REPS2,ARHGEF2,TMSB10,ARID1A,NUP98,TNPO2,HIST1H2AC,HIST2H2AC,HIST2H2AA3,HIST1H2BF,HIST1H4C,HIST1H3I,CAPZA2,KCNAB2,DENR,LSM14A,NAP1L2,NAP1L4,OGT,PDSS2,CAV2,CAPZB,CAT,EIF3D,EIF3F,EIF3G,EIF3H,EIF3B,NFE2,SFRS9,VAMP8,PINK1,EVL,CHRNA3,POLR2K,POLR2A,CFL1,CUTA,CIRBP,AP2S1,PPP2R1A,PFN1,MED16,PAIP2,ARPC2,ARPC3,ARPC1B,…
GO: Biological Process	GO:0065003	macromolecular complex assembly		0	161	982	FERMT3,ACHE,ADD1,ADSL,BCL10,SQSTM1,AHR,ALOX5AP,MAP1B,MAX,NFS1,MAP3K1,APCS,BIRC2,RHOA,REPS2,TMSB10,NUP98,TNPO2,HIST1H2AC,HIST2H2AC,HIST2H2AA3,HIST1H2BF,HIST1H4C,HIST1H3I,CAPZA2,KCNAB2,DENR,LSM14A,NAP1L2,NAP1L4,OGT,PDSS2,CAV2,CAPZB,CAT,EIF3D,EIF3F,EIF3G,EIF3H,EIF3B,SFRS9,VAMP8,PINK1,EVL,CHRNA3,POLR2K,POLR2A,CUTA,CIRBP,AP2S1,PPP2R1A,PFN1,MED16,PAIP2,ARPC2,ARPC3,ARPC1B,ARPC5,ARPC4,GJC1,CTNNA1,CTNNB1,…
GO: Biological Process	GO:0060548	negative regulation of cell death		0	93	475	ADAR,ADM,BCL10,AKT1,SQSTM1,AIF1,TAX1BP1,CFLAR,MCL1,AATF,RHOA,PROK2,PRDX5,BCL2L1,BCL6,FURIN,BNIP3L,CSDA,CASP2,RTN4,CASP3,CASP4,CAT,NFKBIA,NFKB1,NME2,NOTCH1,CD44,GIMAP5,KCNH8,CDKN2D,CDKN1A,CEBPB,CFL1,PPT1,CTNNA1,CTSB,HIPK3,PLCG2,PIM1,CST3,DAD1,RARA,DFFA,TSC22D3,RNF7,QARS,FCER1G,SLC9A1,SOD2,SON,SOD1,SNCA,ERBB4,SYCP3,ETS1,SLC2A3,F2R,IFI6,G6PD,RPS6,FOXO1,PIM2,RTKN,TIMP1,NR2E1,SH3GLB1,PRDX2,GSTP1,ADAM1…
GO: Biological Process	GO:0051246	regulation of protein metabolic process		0	121	687	TINF2,ACHE,TNFRSF14,ADD1,TRAF3IP1,BCL10,AKT1,SQSTM1,AIF1,MAP1B,MAP1A,UBE2M,MTPN,MAP3K1,AATF,RHOA,ARHGEF2,TMSB10,HGS,NRD1,BDKRB1,NIPBL,FURIN,CAMP,CAPZA2,LSM14A,CAPZB,EIF3D,EIF3F,EIF3G,EIF3H,EIF3B,NFKBIA,NFKB1,CCND3,CDK4,PINK1,CD81,UBE2F,CD44,EIF4A3,EVL,PPP1CA,CFL1,PIAS4,MAPK3,MAPK1,PRKCD,CIRBP,FEM1A,PPP2CA,PPP2R1A,PFN1,PAIP2,ENPP1,ARPC2,ARPC3,ARPC1B,ARPC5,CTNNB1,FEM1B,PLEK,EIF1,CST3,CSNK1D,TNK2,CS…
GO: Biological Process	GO:0015986	ATP synthesis coupled proton transport		0	22	43	ATP6V0E1,ATP6V0D1,ATP5B,ATP5A1,ATP5G2,ATP5F1,ATP6V1B2,ATP6V0C,ATP5I,ATP5J,ATP6V1A,ATP6V0B,ATP6V0A1,ATP6V1E1,ATP6AP1,ATP6V1D,ATP6V1F,ATP5J2,ATP5H,TCIRG1,ATP5L,ATP5EP2
GO: Biological Process	GO:0015985	energy coupled proton transport, down electrochemical gradient		0	22	43	ATP6V0E1,ATP6V0D1,ATP5B,ATP5A1,ATP5G2,ATP5F1,ATP6V1B2,ATP6V0C,ATP5I,ATP5J,ATP6V1A,ATP6V0B,ATP6V0A1,ATP6V1E1,ATP6AP1,ATP6V1D,ATP6V1F,ATP5J2,ATP5H,TCIRG1,ATP5L,ATP5EP2
GO: Biological Process	GO:0022618	ribonucleoprotein complex assembly		0	46	163	DENR,LSM14A,EIF3D,EIF3F,EIF3G,EIF3H,EIF3B,SFRS9,CIRBP,PAIP2,EIF1,RBM5,RARA,EIF4A2,EIF4B,EIF4G1,EIF4G2,FECH,SF3A3,SNRPD2,SNRPB,SFRS5,SFRS6,EIF5AL1,ATXN2,RPS6,RPS5,RPS10,RPS2,RPS3A,RPS3,RPL24,RPS25,RPS15,RPS14,RPS17,CD2BP2,GTF2B,PAIP1,EIF2C2,EIF3K,LSM2,SF3A2,EIF3E,BAT1,EIF2AK1
GO: Biological Process	GO:0043069	negative regulation of programmed cell death		0	91	466	ADAR,ADM,BCL10,AKT1,SQSTM1,AIF1,TAX1BP1,CFLAR,MCL1,AATF,RHOA,PROK2,PRDX5,BCL2L1,BCL6,FURIN,BNIP3L,CSDA,CASP2,RTN4,CASP3,CASP4,CAT,NFKBIA,NFKB1,NME2,NOTCH1,CD44,GIMAP5,KCNH8,CDKN2D,CDKN1A,CEBPB,CFL1,PPT1,CTNNA1,HIPK3,PLCG2,PIM1,DAD1,RARA,DFFA,TSC22D3,RNF7,QARS,FCER1G,SLC9A1,SOD2,SON,SOD1,SNCA,ERBB4,SYCP3,ETS1,SLC2A3,F2R,IFI6,G6PD,RPS6,FOXO1,PIM2,RTKN,TIMP1,NR2E1,SH3GLB1,PRDX2,GSTP1,ADAM17,HDAC1,GP…
GO: Biological Process	GO:0043066	negative regulation of apoptosis		0	90	459	ADAR,ADM,BCL10,AKT1,SQSTM1,AIF1,TAX1BP1,CFLAR,MCL1,AATF,RHOA,PROK2,PRDX5,BCL2L1,BCL6,FURIN,BNIP3L,CSDA,CASP2,RTN4,CASP3,CASP4,CAT,NFKBIA,NFKB1,NME2,NOTCH1,CD44,GIMAP5,KCNH8,CDKN2D,CDKN1A,CEBPB,CFL1,PPT1,CTNNA1,HIPK3,PIM1,DAD1,RARA,DFFA,TSC22D3,RNF7,QARS,FCER1G,SLC9A1,SOD2,SON,SOD1,SNCA,ERBB4,SYCP3,ETS1,SLC2A3,F2R,IFI6,G6PD,RPS6,FOXO1,PIM2,RTKN,TIMP1,NR2E1,SH3GLB1,PRDX2,GSTP1,ADAM17,HDAC1,GPX1,SEM…
GO: Biological Process	GO:0006793	phosphorus metabolic process		0	187	1238	RPS6KL1,PPM1M,TNFRSF14,FLJ40125,TRAF3IP1,ADRA2C,MTMR3,BCL10,AKT1,SQSTM1,AIF1,NADK,PTPN22,KSR1,ALPL,STK40,MAP3K1,ATP6V0E1,ARAF,ATP6V0D1,ATP5B,ATP5A1,PROK2,ATP5G2,ATP5F1,ATP6V1B2,ATP6V0C,ATP5I,ATP5J,ATP6V1A,ATP6V0B,ATP6V0A1,ATP6V1E1,DUSP22,ATP6AP1,BCR,BDKRB1,ULK1,STK24,CAMP,CAMK1G,PRKRA,CDK10,NDUFA1,NDUFA3,NDUFA4,NDUFB3,NDUFB2,NDUFB8,NDUFB6,NDUFS3,NEK10,CCND3,CDK4,PINK1,NME2,CDC25C,CD81,CD44,PPP1CC…
GO: Biological Process	GO:0006796	phosphate metabolic process		0	187	1238	RPS6KL1,PPM1M,TNFRSF14,FLJ40125,TRAF3IP1,ADRA2C,MTMR3,BCL10,AKT1,SQSTM1,AIF1,NADK,PTPN22,KSR1,ALPL,STK40,MAP3K1,ATP6V0E1,ARAF,ATP6V0D1,ATP5B,ATP5A1,PROK2,ATP5G2,ATP5F1,ATP6V1B2,ATP6V0C,ATP5I,ATP5J,ATP6V1A,ATP6V0B,ATP6V0A1,ATP6V1E1,DUSP22,ATP6AP1,BCR,BDKRB1,ULK1,STK24,CAMP,CAMK1G,PRKRA,CDK10,NDUFA1,NDUFA3,NDUFA4,NDUFB3,NDUFB2,NDUFB8,NDUFB6,NDUFS3,NEK10,CCND3,CDK4,PINK1,NME2,CDC25C,CD81,CD44,PPP1CC…
GO: Biological Process	GO:0002376	immune system process		0	189	1258	PLDN,MPP1,TNFSF14,MSN,TNFRSF14,MSH3,ADD1,BCL10,AKT1,SQSTM1,MX2,ALAS2,PTPN22,MBP,ASH2L,ANXA11,AIRE,GREM1,AQP9,ZC3HAV1,ARHGDIB,B2M,BDKRB1,SFRS17A,BCL6,PRDX1,BPGM,BNIP3L,IKBKG,MYH9,THOC5,PRKRA,NCF4,CBFB,PGLYRP4,CASP1,CASP3,CD14,CD7,CD247,NFKBIA,NFKB1,CCND3,NME2,CD97,CD81,NOTCH1,CD44,GIMAP5,ZNF160,CDKN1A,CEBPB,CCR6,MAPK1,PRKCD,TNFSF15,AP2M1,AP2S1,PPP3CB,GLRX5,BCL2L11,CRKL,CRHR1,ENPP1,SPG21,KLF6,CTNNB…
GO: Biological Process	GO:0051128	regulation of cellular component organization		0	148	915	TINF2,ACHE,ADD1,AKT1,AHR,CDC16,ALDOA,MAP1B,MAP1A,BIN1,PIAS2,MBP,MTPN,MAP3K1,ATP6V0E1,GREM1,ARHGAP4,RHOA,ARHGEF2,TMSB10,BDKRB1,NIPBL,BCL6,ULK1,BTG1,CAPZA2,MYH9,BLZF1,SERTAD1,CAV2,NDUFS3,CAPZB,RTN4,EIF3D,EIF3F,EIF3G,EIF3H,EIF3B,NUMB,CDK4,PINK1,CDC25C,CD81,CD44,EVL,ZFYVE16,CHRNA3,CDKN2D,CDKN1A,SERTAD2,CFL1,SEC16A,PPT1,AP2S1,PPP2R2B,PPP2CA,PPP2R1A,PFN1,PAIP2,CREB1,ENPP1,ARPC2,ARPC3,ARPC1B,ARPC5,CTNNB…
GO: Biological Process	GO:0032268	regulation of cellular protein metabolic process		0	110	614	TINF2,ACHE,TNFRSF14,ADD1,TRAF3IP1,BCL10,AKT1,SQSTM1,AIF1,MAP1B,MAP1A,MTPN,MAP3K1,AATF,RHOA,ARHGEF2,TMSB10,NRD1,BDKRB1,NIPBL,FURIN,CAMP,CAPZA2,LSM14A,CAPZB,EIF3D,EIF3F,EIF3G,EIF3H,EIF3B,NFKBIA,NFKB1,CCND3,CDK4,PINK1,CD81,CD44,EIF4A3,EVL,PPP1CA,CFL1,PIAS4,MAPK3,MAPK1,PRKCD,CIRBP,FEM1A,PPP2CA,PPP2R1A,PFN1,PAIP2,ENPP1,ARPC2,ARPC3,ARPC1B,ARPC5,CTNNB1,FEM1B,PLEK,EIF1,CSNK1D,TNK2,CSNK1E,RARA,DNMT3B,DBNL…
GO: Biological Process	GO:0006091	generation of precursor metabolites and energy		0	76	366	ACAA1,NDUFA11,ADSL,AKT1,ALDOA,ATP6V0E1,ERO1LB,MDH2,ATP6V0D1,ATP5B,ATP5A1,ATP5G2,ATP5F1,ATP6V1B2,ATP6V0C,ATP5I,ATP5J,ATP6V1A,ATP6V0B,ATP6V0A1,ATP6V1E1,ATP6AP1,OGDH,BPGM,NDUFA1,NDUFA3,NDUFA4,NDUFB3,NDUFB2,NDUFB8,NDUFB6,NDUFS3,CAT,PPP1CC,PPP1CA,PGK1,COX7C,COX8A,COX6C,ENPP1,COX4I1,ATP6V1D,CYBA,SLC25A3,PHKA1,PHKA2,NDUFS7,ATP6V1F,ECH1,ATP5J2,ENO1,FECH,SOD2,SNCA,ETFB,SDHB,G6PC,NDUFB11,ATP5H,GNAS,TPI1,ND…
GO: Biological Process	GO:0034622	cellular macromolecular complex assembly		0	111	632	ADD1,AHR,MAP1B,MAP3K1,APCS,RHOA,TMSB10,NUP98,TNPO2,HIST1H2AC,HIST2H2AC,HIST2H2AA3,HIST1H2BF,HIST1H4C,HIST1H3I,CAPZA2,DENR,LSM14A,NAP1L2,NAP1L4,CAPZB,EIF3D,EIF3F,EIF3G,EIF3H,EIF3B,SFRS9,EVL,CHRNA3,POLR2K,POLR2A,CIRBP,AP2S1,PFN1,MED16,PAIP2,ARPC2,ARPC3,ARPC1B,ARPC5,ARPC4,CYBA,EIF1,CSNK2B,RBM5,H2AFJ,NDUFS7,RARA,RALB,DIAPH1,DBNL,E2F2,H2AFY,RAC1,EIF4A2,EIF4B,EIF4G1,EIF4G2,FECH,SF3A3,SNRPD2,SNRPB,FGA,S…
GO: Biological Process	GO:0034621	cellular macromolecular complex subunit organization		0	118	689	ADD1,AHR,MAP1B,MAP1A,MAP3K1,APCS,RHOA,ARHGEF2,TMSB10,NUP98,TNPO2,HIST1H2AC,HIST2H2AC,HIST2H2AA3,HIST1H2BF,HIST1H4C,HIST1H3I,CAPZA2,DENR,LSM14A,NAP1L2,NAP1L4,CAPZB,EIF3D,EIF3F,EIF3G,EIF3H,EIF3B,NFE2,SFRS9,EVL,CHRNA3,POLR2K,POLR2A,CFL1,CIRBP,AP2S1,PFN1,MED16,PAIP2,ARPC2,ARPC3,ARPC1B,ARPC5,ARPC4,CYBA,PLEK,EIF1,CSNK2B,RBM5,H2AFJ,NDUFS7,RARA,RALB,DIAPH1,DBNL,E2F2,H2AFY,RAC1,EIF4A2,EIF4B,EIF4G1,EIF4G2,…
GO: Biological Process	GO:0048872	homeostasis of number of cells		0	41	144	TNFSF14,ADD1,BCL10,AKT1,ALAS2,BCL6,PRDX1,BPGM,IKBKG,CASP3,CD7,CD44,GIMAP5,PPP3CB,BCL2L11,PIK3CD,EPAS1,FCER1G,FECH,SASH3,SOD1,ETS1,F2R,CORO1A,G6PD,RPS6,FOXO3,RPS24,RPS14,RPS19,RPS17,TIMP1,PRDX2,HBA2,ADAM17,HCLS1,STAT5A,STAT5B,HOXB6,IL7R,LYN
GO: Biological Process	GO:0006119	oxidative phosphorylation		0	34	107	ATP6V0E1,ATP6V0D1,ATP5B,ATP5A1,ATP5G2,ATP5F1,ATP6V1B2,ATP6V0C,ATP5I,ATP5J,ATP6V1A,ATP6V0B,ATP6V0A1,ATP6V1E1,ATP6AP1,NDUFA1,NDUFA3,NDUFA4,NDUFB3,NDUFB2,NDUFB8,NDUFB6,NDUFS3,ATP6V1D,NDUFS7,ATP6V1F,ATP5J2,SNCA,ATP5H,TCIRG1,ATP5L,TAZ,ATP5EP2,hCG_25371
GO: Biological Process	GO:0034220	ion transmembrane transport		1e-06	26	68	ATP6V0E1,RHOA,ATP6V0D1,ATP5B,ATP5A1,ATP5G2,ATP5F1,ATP6V1B2,ATP6V0C,ATP5I,ATP5J,ATP6V1A,ATP6V0B,ATP6V0A1,ATP6V1E1,ATP6AP1,ATP6V1D,ATP6V1F,ATP5J2,SLC11A1,ATP5H,GNAI2,TCIRG1,ATP5L,ATP5EP2,HK1
GO: Biological Process	GO:0044419	interspecies interaction between organisms		1e-06	71	346	TNFRSF14,AP1M1,CFLAR,BIN1,SLC25A5,RHOA,ATP6V0C,NUP98,BNIP3L,IKBKG,THOC5,UBN1,NACA,CD247,NFKBIA,CDC25C,CD81,PIAS4,MAPK3,MAPK1,CREB1,PML,DDB1,DDX3X,PSMB8,PSMB10,E4F1,PSMB6,PSMB4,PSMB3,PSMB1,RAD23A,EIF4A2,EIF4G1,PVRL2,KCTD5,CPSF4,THOC7,RPLP0,RXRA,NXF1,TLR5,TNFRSF1A,TNIP1,GTF2B,IVNS1ABP,HDAC1,RRAGA,TAP1,GPX1,CARM1,STAT3,GRB2,STAT2,HSPA8,VIM,HLA-B,HLA-A,UBE2I,SP110,TSG101,KPNB1,NEDD4L,UBR4,ITGB1,IRF7,…
GO: Biological Process	GO:0051704	multi-organism process		1e-06	133	824	TNFRSF14,ADM,AP1M1,BCL10,MX2,CFLAR,BIN1,SLC25A5,ZC3HAV1,RHOA,B2M,ATP6V0C,ODC1,BDKRB1,NUP98,BNIP3L,CAMP,IKBKG,THOC5,PRKRA,UBN1,NACA,PGLYRP4,CASP1,CD14,CD247,NFKBIA,CDC25C,CD81,HSD17B7,CFL1,PIAS4,MAPK3,MAPK1,AP2M1,AP2S1,CRHR1,CREB1,PHF21A,PML,PLCG2,SERPINA1,DDB1,DDX3X,CYP11A1,DEFA3,DEFA1,PSMB8,PSMB10,E4F1,PSMB6,PSMB4,PSMB3,PSMB1,PSMA2,ENO1,RAD23A,EIF4A2,EIF4G1,PVRL2,FCER1G,FCGRT,SLC11A1,FGR,KCTD5,S…
GO: Biological Process	GO:0022613	ribonucleoprotein complex biogenesis		1e-06	62	285	AATF,DENR,LSM14A,EIF3D,EIF3F,EIF3G,EIF3H,EIF3B,SFRS9,EIF4A3,CIRBP,PAIP2,EIF1,RBM5,NOC4L,RARA,RPL11,RPL5,EIF4A2,EIF4B,EIF4G1,EIF4G2,FECH,SF3A3,SNRPD2,SNRPB,SFRS5,SFRS6,EIF5AL1,ATXN2,RPS6,RPS5,RPS10,RPS2,RPS3A,RPS3,RPL35A,RPLP0,RPL24,RPS24,RPS25,RPS28,GNL3L,RPS15,RPS14,RPS19,RPS16,RPS17,CD2BP2,FCF1,EXOSC3,GTF2B,PAIP1,EIF2C2,EIF3K,NAF1,DDX51,LSM2,SF3A2,EIF3E,BAT1,EIF2AK1
GO: Biological Process	GO:0006917	induction of apoptosis		1e-06	75	379	ABR,TNFSF14,BCL10,SQSTM1,CFLAR,DIABLO,AATF,ARHGAP4,DEDD,ARHGEF2,B2M,PRDX1,BNIP3L,IKBKG,PRKRA,RUNX3,CASP1,NDUFS3,CASP2,CASP3,CASP4,CASP10,BCLAF1,GIMAP5,CDKN1A,CEBPB,MAPK1,PRKCD,PPP3CB,PPP2CA,PPP2R1A,BCL2L11,SHISA5,PDCD7,PML,FEM1B,ZMAT3,EAF2,PYCARD,RPL11,ITM2B,DFFA,ARHGEF6,RNF7,RAC1,PTPN6,PVRL2,ARHGEF3,SERINC3,FCGR2A,FOXO3,BCL2L13,RPS3A,RPS3,TGM2,VAV3,SH3GLB1,NDUFA13,TAP1,GPX1,GSK3B,STAT5A,STAT5B,N…
GO: Biological Process	GO:0012502	induction of programmed cell death		1e-06	75	380	ABR,TNFSF14,BCL10,SQSTM1,CFLAR,DIABLO,AATF,ARHGAP4,DEDD,ARHGEF2,B2M,PRDX1,BNIP3L,IKBKG,PRKRA,RUNX3,CASP1,NDUFS3,CASP2,CASP3,CASP4,CASP10,BCLAF1,GIMAP5,CDKN1A,CEBPB,MAPK1,PRKCD,PPP3CB,PPP2CA,PPP2R1A,BCL2L11,SHISA5,PDCD7,PML,FEM1B,ZMAT3,EAF2,PYCARD,RPL11,ITM2B,DFFA,ARHGEF6,RNF7,RAC1,PTPN6,PVRL2,ARHGEF3,SERINC3,FCGR2A,FOXO3,BCL2L13,RPS3A,RPS3,TGM2,VAV3,SH3GLB1,NDUFA13,TAP1,GPX1,GSK3B,STAT5A,STAT5B,N…
GO: Biological Process	GO:0044085	cellular component biogenesis		3e-06	198	1401	TINF2,FERMT3,ACHE,ACTG1,ACTN1,ADD1,ADSL,BCL10,SQSTM1,AHR,AIF1,ALOX5AP,MAP1B,MAX,NFS1,MAP3K1,APCS,RAB8A,BIRC2,AATF,RHOA,REPS2,TMSB10,ATG12,NUP98,TNPO2,HIST1H2AC,HIST2H2AC,HIST2H2AA3,HIST1H2BF,HIST1H4C,HIST1H3I,CAPZA2,CALD1,KCNAB2,DENR,MYO1A,LSM14A,NAP1L2,NAP1L4,OGT,PDSS2,CAV2,CAPZB,CAT,EIF3D,EIF3F,EIF3G,EIF3H,EIF3B,SFRS9,VAMP8,PINK1,EIF4A3,EVL,CHRNA3,POLR2K,POLR2A,SPOCK2,CUTA,CIRBP,AP2S1,PPP2R1A,P…
GO: Biological Process	GO:0046907	intracellular transport		4e-06	144	942	PLDN,DYNLRB1,TNFSF14,AP1M1,AKT1,SQSTM1,FXC1,CHIC2,RAB8A,ARF1,RHOA,ARHGEF2,HGS,ATP5B,ATP5A1,ATP5F1,ATP5I,ATP5J,NUP98,VPS16,BCL2L1,BCL6,TNPO2,UXT,PRDX1,PTTG1IP,TSPO,MYH9,MYL6,CALM3,THOC5,MCOLN1,BLZF1,UPF2,SEC61A1,SNX15,RAE1,GGA1,NFKBIA,STX10,STX16,VAMP8,TRAK2,PPP1CC,EVL,ZFYVE16,GIMAP5,CTSA,CHML,NUPL1,CFL1,MAPK3,MAPK1,SMG7,MVP,CCS,AP2M1,AP2S1,PPP2R2B,CLTB,KIF27,SLC25A37,PML,BCAP31,TOB1,RBM22,ZMAT3,F…
GO: Biological Process	GO:0016310	phosphorylation		8e-06	155	1044	RPS6KL1,TNFRSF14,TRAF3IP1,ADRA2C,BCL10,AKT1,SQSTM1,AIF1,NADK,KSR1,STK40,MAP3K1,ATP6V0E1,ARAF,ATP6V0D1,ATP5B,ATP5A1,PROK2,ATP5G2,ATP5F1,ATP6V1B2,ATP6V0C,ATP5I,ATP5J,ATP6V1A,ATP6V0B,ATP6V0A1,ATP6V1E1,ATP6AP1,BCR,BDKRB1,ULK1,STK24,CAMP,CAMK1G,PRKRA,CDK10,NDUFA1,NDUFA3,NDUFA4,NDUFB3,NDUFB2,NDUFB8,NDUFB6,NDUFS3,NEK10,CCND3,CDK4,PINK1,NME2,CD81,CD44,CDKN2D,CDKN1A,CFL1,MAP2K2,MAP2K3,MAPK4,MAPK3,MAPK1,PR…
GO: Biological Process	GO:0022607	cellular component assembly		9e-06	182	1281	TINF2,FERMT3,ACHE,ACTG1,ACTN1,ADD1,ADSL,BCL10,SQSTM1,AHR,AIF1,ALOX5AP,MAP1B,MAX,NFS1,MAP3K1,APCS,RAB8A,BIRC2,RHOA,REPS2,TMSB10,ATG12,NUP98,TNPO2,HIST1H2AC,HIST2H2AC,HIST2H2AA3,HIST1H2BF,HIST1H4C,HIST1H3I,CAPZA2,CALD1,KCNAB2,DENR,MYO1A,LSM14A,NAP1L2,NAP1L4,OGT,PDSS2,CAV2,CAPZB,CAT,EIF3D,EIF3F,EIF3G,EIF3H,EIF3B,SFRS9,VAMP8,PINK1,EVL,CHRNA3,POLR2K,POLR2A,SPOCK2,CUTA,CIRBP,AP2S1,PPP2R1A,PFN1,MED16,PA…
GO: Biological Process	GO:0006417	regulation of translation		1.2e-05	41	164	AKT1,MTPN,LSM14A,EIF3D,EIF3F,EIF3G,EIF3H,EIF3B,CDK4,EIF4A3,PPP1CA,MAPK3,MAPK1,CIRBP,PAIP2,EIF1,RARA,EIF4A2,EIF4B,EIF4G1,EIF4G2,PUM1,FECH,FAM129A,EIF5AL1,ATXN2,PPP1R15A,RPS5,LSM14B,EIF2C3,NDUFA13,MKNK2,PAIP1,SRP14,EIF2C2,EIF3K,TNRC6A,TNRC6C,EIF3E,TNRC6B,EIF2AK1
GO: Biological Process	GO:0051093	negative regulation of developmental process		1.8e-05	116	728	ADAR,ADM,BCL10,AKT1,SQSTM1,AIF1,TAX1BP1,CFLAR,MBP,MCL1,AATF,ARHGAP4,RHOA,FOXO4,PROK2,PRDX5,BCL2L1,BCL6,ULK1,FURIN,BNIP3L,CSDA,THOC5,CASP2,RTN4,CASP3,CASP4,CAT,NFKBIA,NFKB1,NME2,NOTCH1,CD44,GIMAP5,KCNH8,GFRA4,CDKN2D,CDKN1A,CEBPB,CFL1,MAPK1,SRGN,PPT1,PPP2R2B,ENPP1,CTNNA1,CTNNB1,PML,TOB1,HIPK3,PLCG2,PIM1,CST3,DAD1,RARA,NTN1,MBNL3,DFFA,TSC22D3,RCAN1,RNF7,QARS,FCER1G,SLC9A1,SOD2,SON,SOD1,SNCA,ERBB4,SY…
GO: Biological Process	GO:0006413	translational initiation		3.9e-05	26	81	DENR,EIF3D,EIF3F,EIF3G,EIF3H,EIF3B,PAIP2,EIF1,RARA,EIF4A2,EIF4B,EIF4G1,EIF4G2,FECH,EIF5AL1,RPS5,RPS2,RPS3A,RPS3,RPS17,GTF2B,PAIP1,EIF2C2,EIF3K,EIF3E,EIF2AK1
GO: Biological Process	GO:0033036	macromolecule localization		5.3e-05	180	1293	TINF2,ACHE,PLDN,TNFSF14,UPF3B,NDUFA11,SNX3,RSL1D1,AP1M1,AKT1,SQSTM1,EIF4ENIF1,FXC1,RAB8A,ARF1,ARF5,ARHGDIG,RHOA,BUB3,ARHGEF2,TMSB10,HGS,SGOL1,COLQ,UNC84B,NUP98,VPS16,NIPBL,BCL6,TNPO2,ULK1,PRDX1,C11orf2,PTTG1IP,CHMP1A,TSPO,MYH9,THOC5,MYO1A,BLZF1,UPF2,NACA,SEC61A1,CASP1,SNX15,RAE1,GGA1,NEDD8,NFKBIA,NFKB1,STX10,STX16,TRAK2,CD81,EIF4A3,ZFYVE16,CTSA,CHML,NUPL1,CFL1,CUTA,SEC16A,MAPK3,MAPK1,SMG7,SRGN,MV…
GO: Biological Process	GO:0042274	ribosomal small subunit biogenesis		5.5e-05	11	16	RPS6,RPS10,RPS2,RPS24,RPS25,RPS28,RPS15,RPS14,RPS19,RPS16,RPS17
GO: Biological Process	GO:0006916	anti-apoptosis		6.4e-05	53	254	ADM,AKT1,SQSTM1,TAX1BP1,CFLAR,MCL1,AATF,PROK2,BCL2L1,BNIP3L,RTN4,NFKBIA,NFKB1,CDKN2D,CDKN1A,CEBPB,CFL1,HIPK3,DAD1,RARA,TSC22D3,RNF7,QARS,SLC9A1,SOD2,SON,SOD1,SNCA,ERBB4,ETS1,IFI6,G6PD,FOXO1,PIM2,RTKN,SH3GLB1,PRDX2,GSTP1,ADAM17,HDAC1,GPX1,SEMA4D,GSK3B,STAR,STAT5A,STAT5B,HBXIP,YWHAZ,VHL,UBB,HSP90B1,TPT1,IL10
GO: Biological Process	GO:0007049	cell cycle		8.9e-05	157	1099	MSH5,RASSF5,BCL10,AKT1,AHR,AIF1,CDC16,BIN1,ANXA11,AATF,BUB3,ARHGEF2,MN1,SGOL1,FOXO4,UNC84B,BCR,NIPBL,BCL6,BRMS1,PRDM9,CHMP1A,CALM2,CALM1,MYH9,CALM3,CDK10,RUNX3,SERTAD1,CAV2,CASP3,CCND3,CDK4,NME2,CDC25C,PPP1CC,PPM1G,RASSF2,PPP1CA,CDKN2D,CDKN1A,KIAA0174,FSD1,MAPK4,MAPK3,MAPK1,RBM38,PPP6C,PPP2CA,DUSP13,ZNF655,PLK1,CTNNB1,CHFR,PML,PIM1,PKD2,RBM5,ANAPC5,CSNK1A1,DDB1,DCTN1,RGS2,PYCARD,SUV39H2,C19orf62,…
GO: Biological Process	GO:0015992	proton transport		0.000127	23	69	ATP6V0E1,ATP6V0D1,ATP5B,ATP5A1,ATP5G2,ATP5F1,ATP6V1B2,ATP6V0C,ATP5I,ATP5J,ATP6V1A,ATP6V0B,ATP6V0A1,ATP6V1E1,ATP6AP1,ATP6V1D,ATP6V1F,ATP6V1G1,ATP5J2,ATP5H,TCIRG1,ATP5L,ATP5EP2
GO: Biological Process	GO:0051641	cellular localization		0.000214	189	1399	TINF2,ACHE,PLDN,DYNLRB1,TNFSF14,AP1M1,AKT1,SQSTM1,FXC1,CHIC2,RAB8A,ARF1,RHOA,BUB3,ARHGEF2,HGS,SGOL1,ATP5B,ATP5A1,ATP5F1,ATP5I,ATP5J,UNC84B,NUP98,VPS16,NIPBL,BCL2L1,BCL6,TNPO2,UXT,PRDX1,FURIN,PTTG1IP,TSPO,MYH9,MYL6,CALM3,THOC5,MYO1A,MCOLN1,BLZF1,UPF2,SEC61A1,CASP1,SNX15,RAE1,RTN4,GGA1,NFKBIA,STX10,STX16,VAMP8,PINK1,TRAK2,PPP1CC,EVL,ZFYVE16,GIMAP5,CTSA,CHML,CHRNA3,NUPL1,CFL1,MAPK3,MAPK1,SMG7,SRGN,M…
GO: Biological Process	GO:0006818	hydrogen transport		0.000233	23	71	ATP6V0E1,ATP6V0D1,ATP5B,ATP5A1,ATP5G2,ATP5F1,ATP6V1B2,ATP6V0C,ATP5I,ATP5J,ATP6V1A,ATP6V0B,ATP6V0A1,ATP6V1E1,ATP6AP1,ATP6V1D,ATP6V1F,ATP6V1G1,ATP5J2,ATP5H,TCIRG1,ATP5L,ATP5EP2
GO: Biological Process	GO:0042257	ribosomal subunit assembly		0.000267	7	7	RPS6,RPS10,RPS2,RPL24,RPS25,RPS15,RPS14
GO: Biological Process	GO:0022604	regulation of cell morphogenesis		0.000277	81	477	ACHE,AKT1,ALDOA,MAP1B,PIAS2,MBP,MTPN,ATP6V0E1,GREM1,ARHGAP4,RHOA,BDKRB1,BCL6,ULK1,BTG1,MYH9,BLZF1,SERTAD1,NDUFS3,RTN4,NUMB,CDK4,CD81,CD44,CHRNA3,CDKN2D,CDKN1A,SERTAD2,CFL1,SEC16A,PPT1,PPP2CA,PPP2R1A,CREB1,ENPP1,PML,PLEK,RASGRP2,ZMAT3,DCX,DDX5,ARHGAP15,EAF2,ERBB2IP,NTN1,DSCAM,ENO1,EMP3,RAC1,FEZ1,SLC9A1,EXTL3,SIPA1,CDC2L2,CORO1A,ADIPOR1,NDUFA13,PCDH24,ADAM17,DIXDC1,SPRR1B,SEMA4D,SRF,GSK3B,RASGRP4,G…
GO: Biological Process	GO:0051438	regulation of ubiquitin-protein ligase activity		0.000365	24	78	CDC16,BUB3,FEM1A,PLK1,FEM1B,ANAPC5,PSMD4,PSMB8,PSMF1,PSMB10,PSMC1,PSME1,PSMD12,PSMB6,PSMB4,PSMB3,PSMB1,PSMA6,PSMA2,UBE2C,CDC26,ZER1,ANAPC10,UBB
GO: Biological Process	GO:0010608	posttranscriptional regulation of gene expression		0.000572	51	256	DPM2,AKT1,MTPN,FBXO7,PRKRA,LSM14A,EIF3D,EIF3F,EIF3G,EIF3H,EIF3B,CDK4,EIF4A3,PPP1CA,MAPK3,MAPK1,PRKCD,CIRBP,RBM38,PAIP2,EIF1,RARA,EIF4A2,EIF4B,EIF4G1,EIF4G2,PUM1,FECH,SLC11A1,FAM129A,EIF5AL1,ATXN2,PPP1R15A,RPS5,LSM14B,EIF2C3,NDUFA13,MKNK2,PAIP1,SRP14,EIF2C2,HNRNPD,EIF3K,TNRC6A,VHL,TNRC6C,EIF3E,USP7,PABPC1,TNRC6B,EIF2AK1
GO: Biological Process	GO:0051340	regulation of ligase activity		0.000809	24	81	CDC16,BUB3,FEM1A,PLK1,FEM1B,ANAPC5,PSMD4,PSMB8,PSMF1,PSMB10,PSMC1,PSME1,PSMD12,PSMB6,PSMB4,PSMB3,PSMB1,PSMA6,PSMA2,UBE2C,CDC26,ZER1,ANAPC10,UBB
GO: Cellular Component	GO:0022626	cytosolic ribosome		0	54	82	RPL36,RPL6,RPL9,RPL8,RPL11,RPL18,RPL19,RPL18A,RPL3,RPL4,RPL5,FAU,RPL35,FTL,RPS6,RPS5,RPS9,RPS12,RPS13,RPS10,RPS11,RPLP1,RPLP2,RPS2,RPS3A,RPS3,RPL31,RPL32,RPL38,RPL39,RPL41,RPLP0,RPL21,RPL24,RPL27A,RPL30,RPS24,RPS25,RPS20,RPS27,RPS27A,RPS28,RPS29,RPS15,RPS14,RPS15A,RPS19,RPS18,RPS16,RPS17,HBA2,UBB,UBA52,RPSA
GO: Cellular Component	GO:0044445	cytosolic part		0	69	162	PRDX5,UXT,IKBKG,RPL36,PFDN5,CTNNB1,PIK3CD,PYCARD,RPL6,RPL9,RPL8,RPL11,RPL18,RPL19,RPL18A,RPL3,RPL4,RPL5,CYB5R3,ENO1,FAU,RPL35,FTL,RPS6,RPS5,RPS9,RPS12,RPS13,RPS10,RPS11,RPLP1,RPLP2,RPS2,RPS3A,RPS3,RPL31,RPL32,RPL38,RPL39,RPL41,RPLP0,RPL21,RPL24,RPL27A,RPL30,RPS24,RPS25,RPS20,RPS27,RPS27A,RPS28,RPS29,RPS15,RPS14,RPS15A,RPS19,RPS18,RPS16,RPS17,HBQ1,HBG2,HBA2,HBB,HBM,BLOC1S2,UBB,UBA52,RPSA,DAPP1
GO: Cellular Component	GO:0033279	ribosomal subunit		0	58	132	RPL7L1,RPL36,MRPS6,RPL6,RPL9,RPL8,RPL11,RPL17,RPL18,RPL19,RPL18A,RPL3,RPL4,RPL5,FAU,RPL35,FTL,RPS6,RPS5,RPS9,RPS12,RPS13,RPS10,RPS11,RPLP1,MRPS12,RPLP2,RPS2,RPS3A,RPS3,RPL31,RPL32,RPL38,RPL39,RPL41,RPLP0,RPL21,RPL24,RPL27A,RPL30,RPS24,RPS25,RPS20,RPS27,RPS27A,RPS28,RPS29,RPS15,RPS14,RPS15A,RPS19,RPS18,RPS16,RPS17,HBA2,UBB,UBA52,RPSA
GO: Cellular Component	GO:0022627	cytosolic small ribosomal subunit		0	30	38	FAU,FTL,RPS6,RPS5,RPS9,RPS12,RPS13,RPS10,RPS11,RPS2,RPS3A,RPS3,RPS24,RPS25,RPS20,RPS27,RPS27A,RPS28,RPS29,RPS15,RPS14,RPS15A,RPS19,RPS18,RPS16,RPS17,HBA2,UBB,UBA52,RPSA
GO: Cellular Component	GO:0030529	ribonucleoprotein complex		0	127	544	ABCF1,RPS6KL1,ACTB,RSL1D1,RPL7L1,SFRS17A,PCBP1,PCBP2,CSDA,SF3B5,LSM14A,RPL36,RPL10A,SYF2,MRPS6,EIF4A3,CIRBP,MVP,LSM7,PDCD7,WAC,RBM22,RBM5,NOC4L,DDX5,RPL6,RPL9,RPL8,RPL11,RPL12,RPL17,RPL15,RPL18,RPL19,RPL18A,RPL3,RPL4,RPL5,PTBP1,MRPL33,EEF2,FAU,SF3A3,SNRPD2,SNRPB,SFRS2,ATXN2,EDC4,RPL35,FTL,RPS6,RPS6KA1,RPS5,RPS9,RPS12,RPS13,RPS10,RPS11,RPLP1,MRPS12,RPLP2,RPS2,RPS3A,RPS3,RPL31,RPL32,RPL35A,RPL36AL,…
GO: Cellular Component	GO:0005840	ribosome		0	71	213	ABCF1,RPS6KL1,RSL1D1,RPL7L1,RPL36,RPL10A,MRPS6,RPL6,RPL9,RPL8,RPL11,RPL12,RPL17,RPL15,RPL18,RPL19,RPL18A,RPL3,RPL4,RPL5,MRPL33,FAU,RPL35,FTL,RPS6,RPS6KA1,RPS5,RPS9,RPS12,RPS13,RPS10,RPS11,RPLP1,MRPS12,RPLP2,RPS2,RPS3A,RPS3,RPL31,RPL32,RPL35A,RPL36AL,RPL37A,RPL38,RPL39,RPL41,RPLP0,RPL21,RPL24,RPL27,RPL27A,RPL30,RPS24,RPS25,RPS20,RPS27,RPS27A,RPS28,RPS29,MRPL50,RPS15,RPS14,RPS15A,RPS19,RPS18,RPS16,…
GO: Cellular Component	GO:0015935	small ribosomal subunit		0	32	64	MRPS6,FAU,FTL,RPS6,RPS5,RPS9,RPS12,RPS13,RPS10,RPS11,MRPS12,RPS2,RPS3A,RPS3,RPS24,RPS25,RPS20,RPS27,RPS27A,RPS28,RPS29,RPS15,RPS14,RPS15A,RPS19,RPS18,RPS16,RPS17,HBA2,UBB,UBA52,RPSA
GO: Cellular Component	GO:0022625	cytosolic large ribosomal subunit		0	24	39	RPL36,RPL6,RPL9,RPL8,RPL11,RPL18,RPL19,RPL18A,RPL3,RPL4,RPL5,RPL35,RPLP1,RPLP2,RPL31,RPL32,RPL38,RPL39,RPL41,RPLP0,RPL21,RPL24,RPL27A,RPL30
GO: Cellular Component	GO:0016469	proton-transporting two-sector ATPase complex		0	23	47	ATP6V0E1,ATP6V0D1,ATP5B,ATP5A1,ATP5G2,ATP5F1,ATP6V1B2,ATP6V0C,ATP5I,ATP5J,ATP6V1A,ATP6V0B,ATP6V0A1,ATP6V1E1,ATP6AP1,ATP6V1D,ATP6V1F,ATP6V1G1,ATP5J2,ATP5H,TCIRG1,ATP5L,ATP5EP2
GO: Cellular Component	GO:0015934	large ribosomal subunit		0	26	70	RPL7L1,RPL36,RPL6,RPL9,RPL8,RPL11,RPL17,RPL18,RPL19,RPL18A,RPL3,RPL4,RPL5,RPL35,RPLP1,RPLP2,RPL31,RPL32,RPL38,RPL39,RPL41,RPLP0,RPL21,RPL24,RPL27A,RPL30
GO: Cellular Component	GO:0033177	proton-transporting two-sector ATPase complex, proton-transporting domain		3.6e-05	13	25	ATP6V0E1,ATP6V0D1,ATP5G2,ATP5F1,ATP6V0C,ATP5I,ATP5J,ATP6V0B,ATP6V0A1,ATP5J2,ATP5H,TCIRG1,ATP5L
GO: Cellular Component	GO:0005654	nucleoplasm		6.5e-05	145	1035	TINF2,ACTB,EDF1,AKT1,SQSTM1,AHR,CDC16,PIAS2,MAX,ASH2L,INTS6,ANXA11,MCL1,ATF4,ARID1A,NUP98,SFRS17A,RBM10,STK24,PRDM9,YTHDC1,PBX2,ZMIZ1,CALM3,UBN1,NAP1L2,NAP1L4,OGT,CASP3,NFKB1,CDK4,CDC25C,PPP1CC,EIF4A3,PPP1CA,CHD4,SART3,POLR2K,CDKN1A,POLR2A,DAZAP2,MED15,MAPK3,MAPK1,CIRBP,RFWD2,MED16,CREB1,C17orf49,WAC,PHF21A,PLK1,CTNNB1,CHFR,PML,HIPK3,ANAPC5,DDB1,DDX3X,RING1,EAF2,RBBP4,DNA2,RPA2,DFFA,PTBP1,E4F1,E2…
GO: Cellular Component	GO:0005773	vacuole		8e-05	53	274	BCL10,ANXA11,TRIM23,ATP6V0D1,ATP6V0C,ATP6V0B,ATP6AP1,VPS16,ULK1,DPP7,MCOLN1,CAT,CD68,CTSA,SRGN,PPT1,PRCP,CLCN7,TSPAN1,SLC15A3,ATP6V1D,CTSB,CST3,ATG9A,ATP6V1F,CYLC1,LITAF,PSAP,ATP6V1G1,PRDX6,SLC11A1,SGSH,IRGM,GNS,RAMP2,STX4,NPC2,TM9SF1,HPS1,HEXB,WDFY3,IGF2R,NCSTN,GABARAPL2,GABARAP,RAB7A,FNBP1,AP3M1,MAP1LC3B,VPS41,LAMP1,LAPTM5,LAMP2
GO: Cellular Component	GO:0005739	mitochondrion		0.000201	191	1475	ACAA1,ACLY,NDUFA11,ADSL,ALDH9A1,ALAS2,ALDOA,FXC1,NFS1,SLC25A5,DIABLO,ARAF,MCL1,MDH2,GSTK1,RHOA,FIBP,ATP5B,ATP5A1,FRMD6,STARD7,ATP5G2,ATP5F1,ATP5I,ATP5J,ATP6V1A,ATP6V1E1,NRD1,PRDX5,BCKDHA,OGDH,BCL2L1,PRDX1,BNIP3L,TSPO,AKR7A2,PDSS2,NDUFA1,NDUFA3,NDUFA4,NDUFB3,NDUFB2,NDUFB8,NDUFB6,NDUFS3,CASP3,LYRM1,CAT,PNPT1,RPL10A,LETMD1,VAMP8,MCART1,PINK1,NME2,MRPS6,RNASET2,PPP1CC,KIAA0101,GIMAP5,CTSA,OXCT2,RFK,L…
GO: Cellular Component	GO:0031975	envelope		0.000316	110	753	ACHE,NDUFA11,ALAS2,ALOX5,ALOX5AP,FXC1,ANXA11,SLC25A5,NARF,DIABLO,MCL1,MDH2,GSTK1,ATP5B,ATP5A1,ATP5G2,ATP5F1,ATP5I,ATP5J,UNC84B,NUP98,OGDH,BCL2L1,TNPO2,TAGLN2,BNIP3L,TSPO,MTDH,NDUFA1,NDUFA3,NDUFA4,NDUFB3,NDUFB2,NDUFB8,NDUFB6,NDUFS3,RAE1,RTN4,CAT,PNPT1,MCART1,PINK1,PPP1CC,GIMAP5,NUPL1,SLC25A39,MVP,PPP2R2B,CLIC1,COX7C,COX8A,BCL2L11,COX7A2,COX6C,SHISA5,COX6B1,COX5B,SLC25A37,COX4I1,PML,SLC25A3,CST3,NO…
GO: Cellular Component	GO:0044437	vacuolar part		0.000394	29	118	TRIM23,ATP6V0D1,ATP6V0C,ATP6V0B,ATP6AP1,VPS16,MCOLN1,CD68,CLCN7,TSPAN1,SLC15A3,ATP6V1D,ATG9A,ATP6V1F,CYLC1,LITAF,PSAP,ATP6V1G1,IRGM,TM9SF1,IGF2R,NCSTN,GABARAPL2,GABARAP,MAP1LC3B,VPS41,LAMP1,LAPTM5,LAMP2
GO: Cellular Component	GO:0031967	organelle envelope		0.00045	108	741	ACHE,NDUFA11,ALAS2,ALOX5,ALOX5AP,FXC1,ANXA11,SLC25A5,NARF,DIABLO,MCL1,MDH2,GSTK1,ATP5B,ATP5A1,ATP5G2,ATP5F1,ATP5I,ATP5J,UNC84B,NUP98,OGDH,BCL2L1,TNPO2,TAGLN2,BNIP3L,TSPO,MTDH,NDUFA1,NDUFA3,NDUFA4,NDUFB3,NDUFB2,NDUFB8,NDUFB6,NDUFS3,RAE1,RTN4,CAT,PNPT1,MCART1,PINK1,PPP1CC,GIMAP5,NUPL1,SLC25A39,MVP,PPP2R2B,CLIC1,COX7C,COX8A,BCL2L11,COX7A2,COX6C,SHISA5,COX6B1,COX5B,SLC25A37,COX4I1,PML,SLC25A3,CST3,NO…
GO: Cellular Component	GO:0005740	mitochondrial envelope		0.000742	77	485	NDUFA11,ALAS2,FXC1,SLC25A5,DIABLO,MCL1,MDH2,GSTK1,ATP5B,ATP5A1,ATP5G2,ATP5F1,ATP5I,ATP5J,OGDH,BCL2L1,BNIP3L,TSPO,NDUFA1,NDUFA3,NDUFA4,NDUFB3,NDUFB2,NDUFB8,NDUFB6,NDUFS3,CAT,PNPT1,MCART1,PINK1,PPP1CC,GIMAP5,SLC25A39,PPP2R2B,COX7C,COX8A,BCL2L11,COX7A2,COX6C,COX6B1,COX5B,SLC25A37,COX4I1,SLC25A3,NDUFS7,CYP11A1,COX5A,CYB5R3,STARD13,ATP5J2,ACSL3,FECH,SOD2,SDHB,BCL2L13,MTCH1,TOMM7,NDUFB11,ATP5H,SH3GLB1,…
GO: Cellular Component	GO:0016607	nuclear speck		0.000904	28	116	PIAS2,SFRS17A,ZMIZ1,EIF4A3,SART3,RFWD2,WAC,DDX3X,RING1,EAF2,SF3A3,SON,RNF34,SFRS2,SFRS4,NXF1,CD2BP2,BASP1,SRRM1,GATAD2A,SRP54,SF3B1,U2AF2,SRRM2,FYTTD1,CXXC1,BAT1,PSME4
HUMAN PHENOTYPES AND DISEASES
Human Phenotype	HP:0001871	Hematological abnormality		4.5e-05	70	469	TINF2,ALAS2,PTPN22,ALDOA,ALPL,CHIC2,AIRE,MCL1,B2M,BCR,NIPBL,BPGM,IKBKG,MYH9,CASP10,CD247,CLCN7,PGK1,PGD,GLRX5,NT5C3,COL7A1,COX6B1,VKORC1,CSF2RA,RARA,DNMT3B,HPS6,DGUOK,CYB5R3,FECH,FCGR3A,FGA,SELL,G6PD,G6PC,PADI4,RPS19,GP9,TPI1,TCIRG1,HBG2,HBA2,HBB,TAZ,HAGH,NPC2,GPX1,AKR1D1,STAT3,HPRT1,HPS1,HK1,CFH,VHL,WAS,IFNGR1,IFNGR2,CDAN1,SP110,ITGB2,ITGAX,IRF1,ISCU,IL10,LYL1,BCAM,LIG4,UQCRQ,KRT9
Human Phenotype	HP:0001939	Metabolism abnormality		0.004274	144	1383	TINF2,ABR,ACAA1,NDUFA11,SNX3,ADSL,AKT1,SQSTM1,ALAS2,PTPN22,ALDOA,ALPL,AIRE,ARAF,MN1,FOXO4,MMP2,B2M,DYSF,FBXO7,BCR,NIPBL,BCKDHA,OGDH,PLA2G6,BPGM,MYH9,MCOLN1,PDSS2,NDUFA1,NDUFS3,CASP10,CAT,CD247,STX16,CTSA,PPT1,CLCN7,PGK1,PGD,GLRX5,NT5C3,ENPP1,COL7A1,COX6B1,PLOD1,CTNNB1,VKORC1,CYBA,MTMR14,PHKA1,PHKA2,CST3,SERPINA1,DDB1,DCK,DCTN1,DBT,DBI,NDUFS7,CYP11A1,RARA,ZFP57,FGD3,DNMT3B,CFC1,DMD,HPS6,DGUOK,CYB5…
Human Phenotype	HP:0001878	Hemolytic anemia		0.00615	18	67	PTPN22,ALDOA,BPGM,CASP10,CD247,PGK1,NT5C3,FECH,FCGR3A,G6PD,TPI1,HBA2,HBB,GPX1,HK1,CFH,WAS,ITGAX
Human Phenotype	HP:0001897	Normocytic anemia		0.006901	5	5	ALDOA,BPGM,G6PD,TPI1,HK1
Human Phenotype	HP:0001081	Cholelithiasis		0.013289	8	15	ALDOA,AIRE,BPGM,FECH,G6PD,TPI1,HBB,HK1
Human Phenotype	HP:0001930	Nonspherocytic hemolytic anemia		0.013351	6	8	BPGM,PGK1,TPI1,HBA2,HBB,HK1
Human Phenotype	HP:0001877	Abnormality of erythrocytes		0.037654	33	194	TINF2,ALAS2,PTPN22,ALDOA,BPGM,CASP10,CD247,CLCN7,PGK1,GLRX5,NT5C3,COL7A1,COX6B1,CYB5R3,FECH,FCGR3A,G6PD,RPS19,TPI1,TCIRG1,HBA2,HBB,HAGH,GPX1,HPRT1,HK1,CFH,VHL,WAS,CDAN1,ITGAX,IRF1,ISCU
Disease	D015473	Leukemia, Promyelocytic, Acute	CTD	0.016264	7	11	AKT1,CD44,PML,RARA,ITGB2,ITGAL,ITGAX
Disease	D029503	Anemia, Diamond-Blackfan	CTD	0.016548	6	8	RPL11,RPL5,RPL35A,RPS24,RPS19,RPS17
MOLECULAR AND CELLULAR PATHWAYS
Pathway	72766	Translation	Reactome	0	73	118	EIF3D,EIF3F,EIF3G,EIF3H,EIF3B,RPL36,RPL10A,RPL6,RPL9,RPL8,RPL11,RPL12,RPL17,RPL15,RPL18,RPL19,RPL18A,RPL3,RPL4,RPL5,EEF1A1,EIF4A1,EIF4A2,EIF4B,EIF4G1,EEF2,EEF1B2,FAU,RPL35,RPS6,RPS5,RPS9,RPS12,RPS13,RPS10,RPS11,RPLP1,RPLP2,RPS2,RPS3A,RPS3,RPL31,RPL32,RPL35A,RPL37A,RPL38,RPL39,RPL41,RPLP0,RPL21,RPL24,RPL27,RPL27A,RPL30,RPS24,RPS25,RPS20,RPS27,RPS27A,RPS28,RPS29,RPS15,RPS14,RPS15A,RPS19,RPS18,RPS16…
Pathway	RIBOSOMAL_PROTEINS	RIBOSOMAL_PROTEINS	MSigDB	0	62	106	RPL36,RPL6,RPL9,RPL8,RPL11,RPL12,RPL17,RPL15,RPL18,RPL19,RPL18A,RPL3,RPL4,RPL5,TBC1D10C,FAU,HSD11B1L,RPL35,RPS6,RPS6KA1,RPS5,RPS6KB2,RPS9,RPS12,RPS13,RPS10,RPS11,RPLP1,RPLP2,RPS2,RPS3A,RPS3,RPL31,RPL32,RPL35A,RPL38,RPL39,RPL41,RPLP0,RPL21,RPL24,RPL27,RPL27A,RPL30,RPS24,RPS25,RPS20,RPS27,RPS27A,RPS28,RPS29,RPS15,RPS14,RPS19,RPS18,RPS16,RPS17,LOC388720,UBB,UBC,UBA52,RPSA
Pathway	74160	Gene Expression	Reactome	0	105	269	PCBP1,PCBP2,SF3B5,EIF3D,EIF3F,EIF3G,EIF3H,EIF3B,RPL36,RPL10A,SFRS9,POLR2K,POLR2A,RBM5,RPL6,RPL9,RPL8,RPL11,RPL12,RPL17,RPL15,RPL18,RPL19,RPL18A,RPL3,RPL4,RPL5,EEF1A1,PTBP1,EIF4A1,EIF4A2,EIF4B,EIF4G1,EEF2,EEF1B2,FAU,SF3A3,SNRPD2,SNRPB,PAPOLA,SFRS2,SFRS5,SFRS6,SFRS4,RPL35,RPS6,RPS5,RPS9,RPS12,RPS13,RPS10,RPS11,RPLP1,RPLP2,RPS2,RPS3A,RPS3,RPL31,RPL32,RPL35A,RPL37A,RPL38,RPL39,RPL41,RPLP0,RPL21,RPL24…
Pathway	hsa03010	Ribosome	KEGG pathway	0	58	102	RPL10A,RPL6,RPL9,RPL8,RPL11,RPL12,RPL17,RPL15,RPL18,RPL19,RPL18A,RPL3,RPL4,RPL5,FAU,RPL35,RPS6,RPS5,RPS9,RPS12,RPS13,RPS10,RPS11,RPLP1,RPLP2,RPS2,RPS3A,RPS3,RPL31,RPL32,RPL35A,RPL36AL,RPL37A,RPL38,RPL39,RPL41,RPLP0,RPL21,RPL24,RPL27,RPL27A,RPL30,RPS24,RPS25,RPS20,RPS27,RPS27A,RPS28,RPS29,RPS15,RPS15A,RPS19,RPS18,RPS16,LOC388720,UBA52,LOC440733,RPSA
Pathway	OXIDATIVE_PHOSPHORYLATION	OXIDATIVE_PHOSPHORYLATION	MSigDB	1e-06	28	63	NDUFA11,ATP6V0E1,ATP6V0D1,ATP6V1B2,ATP6V0C,ATP6V1A,ATP6V0B,ATP6V0A1,ATP6V1E1,ATP6AP1,NDUFA1,NDUFA4,NDUFB2,NDUFB6,COX7C,COX8A,COX7A2,COX6C,COX6B1,COX5B,COX4I1,ATP6V1D,ATP6V1F,COX5A,ATP6V1G1,SDHB,UQCRFS1,PPA2
Pathway	hsa00190	Oxidative phosphorylation	KEGG pathway	1e-06	45	139	NDUFA11,ATP6V0E1,ATP6V0D1,ATP5B,ATP5A1,ATP5G2,ATP5F1,ATP6V1B2,ATP6V0C,ATP5I,ATP5J,ATP6V1A,ATP6V0B,ATP6V0A1,ATP6V1E1,ATP6AP1,NDUFA1,NDUFA3,NDUFA4,NDUFB3,NDUFB2,NDUFB8,NDUFB6,NDUFS3,COX7C,COX8A,COX7A2,COX6C,COX6B1,COX5B,COX4I1,ATP6V1D,NDUFS7,ATP6V1F,COX5A,ATP6V1G1,ATP5J2,SDHB,ATP5H,TCIRG1,ATP5L,UQCRFS1,hCG_25371,UQCRQ,PPA2
Pathway	MAP00190_Oxidative_phosphorylation	MAP00190 Oxidative phosphorylation	GenMAPP	0.000135	20	44	ATP6V0E1,ATP6V0D1,ATP6V1B2,ATP6V0C,ATP6V1A,ATP6V0B,ATP6V0A1,ATP6V1E1,ATP6AP1,COX7C,COX7A2,COX6C,COX5B,COX4I1,ATP6V1D,ATP6V1F,COX5A,ATP6V1G1,SDHB,UQCRFS1
Pathway	foxopathway	FoxO family signaling	NCI-Nature Curated	0.000225	21	49	AKT1,FOXO4,BCL6,CAT,BCL2L11,PLK1,CTNNB1,CSNK1D,CSNK1A1,CSNK1E,RALB,YWHAQ,SOD2,G6PC,FOXO1,FOXO3,YWHAH,YWHAZ,YWHAB,USP7,ZFAND5
Pathway	MAP00193_ATP_synthesis	MAP00193 ATP synthesis	GenMAPP	0.000558	12	19	ATP6V0E1,ATP6V0D1,ATP6V1B2,ATP6V0C,ATP6V1A,ATP6V0B,ATP6V0A1,ATP6V1E1,ATP6AP1,ATP6V1D,ATP6V1F,ATP6V1G1
Pathway	MAP03070_Type_III_secretion_system	MAP03070 Type III secretion system	GenMAPP	0.000558	12	19	ATP6V0E1,ATP6V0D1,ATP6V1B2,ATP6V0C,ATP6V1A,ATP6V0B,ATP6V0A1,ATP6V1E1,ATP6AP1,ATP6V1D,ATP6V1F,ATP6V1G1

## Sheet: PC3 MN TOP1000
TOPPFUN OUTPUT FOR TOP 1000 SIGNIFICANT TRANSCRIPTS FOR PC3 in MN study
				P-value	Hits in List	Count in DB	Targets
TRANSCRIPTION FACTOR BINDING SITES
TFBS	SCGGAAGY_V$ELK1_02	SCGGAAGY_V$ELK1_02		0.000379	89	871	ACTB,TAX1BP1,ALDOA,MTPN,DIABLO,MEIS2,RHOA,ATP5A1,SH3GLB2,ATP5I,NRD1,GRIPAP1,PRDX5,BCL2L1,ANKMY2,GLTSCR2,PCBP1,PCBP2,COPS3,BLZF1,CGGBP1,EPN1,SEC61A1,GGA1,EIF3H,NEDD8,ZFYVE16,POLR2K,MED15,AP2S1,WDR1,COX8A,ARPC2,COX5B,RBM22,NOL7,CSNK2B,DDX5,DIAPH1,RPL6,RPL11,RPL19,DGUOK,PSMC1,PSMD12,PSMB1,PSMA6,MAP4K2,SEC24C,EIF4A1,EEF1B2,SFRS6,SIPA1,MKRN1,CCNDBP1,CDC37,RPS6,RPS5,RPLP2,RPS3A,RPS3,RPL31,RPL32,RPL36AL…
MICRO RNA BINDING SITES
None
DRUGS
Drug	C099555	CD 437	CTD	0	61	196	ALDOA,UBE2M,ARF1,ARHGDIB,TMSB10,ATP5B,ATP5A1,ATP6V0C,PCBP1,PCBP2,SH3BGRL3,NACA,NFKBIA,KIAA0101,CEBPB,AP2S1,CLIC1,PFN1,COX7C,COX7A2,COX6C,ARPC2,ARPC3,SLC25A37,SLC25A3,RPL8,RPL11,RPL19,PSMF1,PSMB1,ENO1,EIF4A1,EIF4A2,EEF2,SNRPD2,RPL35,CORO1A,CCL5,WDR45,RPS10,RPLP1,RPLP2,RPS2,RPL36AL,RPL39,RPL24,RPS27,RPS15,TOMM7,RPS16,RPS17,ATP5L,ARL6IP5,HSP90AA1,DNAJA1,YWHAZ,UBA52,TXN,RYBP,PABPC1,TUBA1A
Drug	CID000000730	guanosine diphosphate	Stitch	0	102	651	AKT1,ARF1,ARHGDIB,RHOA,RHOG,SEC61A1,PNPT1,EIF3D,EIF3G,EIF3H,EIF3B,RPL36,RPL10A,VAMP8,POLR2K,POLR2A,MAP2K2,PRKCD,SRGN,RASGRP2,RGS2,RPL6,RPL8,RPL11,RPL12,RPL17,RPL15,RPL18,RPL19,RPL18A,RPL3,RPL4,RPL5,STARD13,EEF1A1,SEC24C,RAC1,RAC2,EIF4A1,EIF4A2,EIF4G1,EEF2,EEF1B2,FCER1G,FAU,F2R,RPL35,RPS6,RPS5,RPS9,RPS12,RPS13,RPS10,RPS11,RPLP1,RPLP2,RPS2,RPN1,RPS3A,RPS3,RPL31,RPL32,RPL35A,RPL37A,RPL38,RPLP0,RPL24…
Drug	CID000000762	guanosine triphosphate	Stitch	0	125	926	AKT1,ARF1,ARHGDIB,RHOA,RHOG,NUP98,BCL6,CALM2,CALM3,SEC61A1,EIF3D,EIF3G,EIF3H,EIF3B,RPL36,RPL10A,VAMP8,GIMAP4,POLR2K,POLR2A,MAP2K2,MAPK3,PRKCD,SRGN,ARHGAP9,RASGRP2,CSNK2B,CSK,DCK,CYP2D7P1,DNA2,RPL6,RPL8,RPL11,RPL12,RPL17,RPL15,RPL18,RPL19,RPL18A,RPL3,RPL4,RPL5,DGUOK,STARD13,EEF1A1,ROCK2,MAP4K2,SEC24C,RAC1,RAC2,EIF4A1,EIF4A2,EIF4G1,EEF2,EEF1B2,FAU,EVI2B,F2R,RPL35,RPS6,RPS5,RPS9,RPS12,RPS13,RPS10,RP…
Drug	C472791	3-(4'-hydroxy-3'-adamantylbiphenyl-4-yl)acrylic acid	CTD	0	85	578	ACTB,CDKN2AIPNL,NADK,CFLAR,ALOX5,UBE2M,ARF1,TMSB10,ATP5B,ATP5A1,ATP5I,GCA,ULK1,BTG1,PCBP2,NACA,NDUFA1,VAMP8,KIAA0101,RASSF2,CEBPB,CFL1,KLF13,AP2S1,CLIC1,PFN1,COX7C,COX7A2,COX6C,PFDN5,ARPC2,ARPC3,COX5B,SLC25A37,VKORC1,RASGRP2,SLC25A3,H2AFJ,RPL6,MICALL2,RPL8,RPL19,RPL18A,PSMF1,TMEM17,PSMB1,ENO1,EIF4A1,EIF4A2,EIF4G2,EEF2,SNRPD2,CARHSP1,RPS10,RPLP1,RPS2,RPL32,RPL36AL,RPL39,RPL41,RPL24,RTKN,RPS27,RPS2…
Drug	D014635	Valproic Acid	CTD	0	98	804	CCM2,ALDH9A1,ARF1,TMSB10,MGAT1,FAM50A,ATP5I,ATP6AP1,OAZ1,TAGLN2,TSPO,PBX2,CAMLG,OGT,NDUFA1,NDUFA3,RPL36,RPL10A,USP49,NFKBIA,NFKB1,EFHD2,MAP2K3,PRKACG,TMEM66,PFN1,COX7C,CREB1,PFKFB4,COX6B1,KLF6,RBM22,CCDC72,FLOT1,UBE2L6,PYCARD,RALGDS,RPL17,RPL18A,CYB5R3,CCDC56,PSMD4,PSMB6,PSMB3,PSMB1,EMP3,SNRPD2,PRR13,SHOX2,S100A8,CDC37,RPS9,RPS12,RPS11,RPLP1,RPS2,RPL31,RPL37A,RPL39,RPL41,RPL24,RPL27,RPS27,RPS27A,…
Drug	D018684	Glycine Agents	CTD	0	22	57	RPL6,RPL9,RPL12,RPL19,RPL18A,RPL4,EEF2,RPL35,RPS6,RPS5,RPLP2,RPS2,RPS3A,RPL37A,RPL24,RPL27,RPS25,RPS20,GNB1,MGEA5,HBB,RPSA
Drug	D006830	Hydralazine	CTD	0	93	756	CCM2,ALDH9A1,ARF1,TMSB10,MGAT1,FAM50A,ATP5I,ATP6AP1,OAZ1,TSPO,PBX2,CAMLG,OGT,NDUFA1,NDUFA3,RPL36,RPL10A,USP49,EFHD2,MAP2K3,PRKACG,TMEM66,PFN1,COX7C,PFKFB4,COX6B1,KLF6,RBM22,CCDC72,FLOT1,UBE2L6,PYCARD,RALGDS,RPL17,RPL18A,CYB5R3,CCDC56,PSMD4,PSMB6,PSMB3,PSMB1,EMP3,SNRPD2,PRR13,SHOX2,S100A8,CDC37,RPS9,RPS12,RPS11,RPLP1,RPS2,RPL31,RPL37A,RPL39,RPL41,RPL24,RPL27,RPS27,RPS27A,TOMM7,RPP21,AURKAIP1,ADIPO…
Drug	D014810	Vitamin E	CTD	0	145	1453	ACTB,MSN,ADD1,AKT1,AHR,NADK,CFLAR,ALDOA,BIN1,DIABLO,ARF5,MDH2,LRRFIP1,RHOG,ATP5B,MMP2,ATP5I,BCL2L1,BCL6,BRMS1,CSDA,IFITM1,MYL6,CALM3,UBN1,NDUFA3,NDUFB8,CAPZB,CAT,RPL10A,NEDD8,NFKBIA,CCND3,KBTBD2,RNASET2,CD44,EVL,KIAA0101,PPP1CA,FAM115A,EFHD2,PIAS4,MED15,SGSM2,MAPK3,CIRBP,AP2S1,CLIC1,CLTB,WDR1,PFN1,CREB1,PFDN5,PML,PRR14,BCAP31,VKORC1,ACTR1A,RASGRP2,PIM1,FLOT1,C19orf56,CSNK2B,RBM5,SPSB3,RGS2,BRD2,P…
Drug	C028904	isoproturon	CTD	0	21	55	ALPL,SEC61A1,CFL1,RPL6,RPL9,RPL19,RPL18A,EEF2,RPS6,RPS13,RPLP2,RPS2,RPS3A,RPL38,RPL24,RPS25,RPS20,RPS19,RPS17,HBB,TUBA1A
Drug	D004237	Diuron	CTD	0	22	62	ACHE,AHR,SEC61A1,CFL1,RPL6,RPL9,RPL19,RPL18A,EEF2,RPS6,RPS13,RPLP2,RPS2,RPS3A,RPL38,RPL24,RPS25,RPS20,RPS19,RPS17,HBB,TUBA1A
Drug	D018038	Sodium Selenite	CTD	0	123	1188	ACHE,ACTB,ADD1,AKT1,ARF5,GPHB5,MMP2,ATP5G2,ATP6V0A1,NUP98,PRDX5,BCL2L1,PLSCR3,SH3KBP1,C11orf2,PTTG1IP,COPS3,CAMP,CAMLG,BLZF1,ACOT11,NACA,NDUFA3,NDUFA4,CASP10,CAT,RPL10A,CD14,CHML,POLR2A,CD52,CFL1,MAP2K2,MAPK3,PRKCD,PPP6C,CLK3,COX8A,COX6C,PFDN5,ARPC2,COX4I1,VKORC1,CCDC72,TSEN34,DDX3X,DARS,PPP2R2D,SSU72,RPL6,RPL9,RPL8,RPL12,RPL17,RPL15,RPL18A,RPL4,RPL5,DEFA3,GSTO1,STARD13,ARHGEF6,PSMD4,PSMB10,GMFG,…
Drug	D002995	Clofibric Acid	CTD	0	79	666	AHR,ALDOA,ALPL,DIABLO,APCS,TMSB10,MGAT1,ATF4,PRDX5,BTF3,PTTG1IP,IGSF11,CALM2,SEC61A1,NDUFB3,NEDD8,CD14,PPID,MAP2K3,PPP2CA,PFN1,COX8A,COX7A2,CTNNB1,VKORC1,CTSB,DDB1,DARS,NDUFS7,SSU72,PLAA,RPL8,RPL18,RPL3,RPL5,CYB5R3,GSTO1,PSMB10,PTBP1,EIF4A2,ERP29,SORL1,SOD2,SYCP3,SFRS2,SLC17A3,CDC37,RPS6,RPS5,RPS9,RPS10,RPS2,RPS3A,RPS3,RPL31,RPL32,MRFAP1,RPL41,RPL24,RPL27,RXRA,RPS24,RPS20,RPS27,RPS27A,RPS29,RPS15…
Drug	C014707	nitrosobenzylmethylamine	CTD	6e-06	65	532	ACTB,ALOX5,MTPN,ATP6V0E1,GREM1,AQP9,TMSB10,ATF4,B2M,ATP6V1B2,SH3KBP1,GLTSCR2,TSPO,PCMT1,CALM3,NEDD8,CD81,CD44,PPID,CEBPB,CFL1,CLIC1,PPP2CA,ROD1,ZMAT3,SLC25A3,CSNK2B,DDX5,PYCARD,PLAA,PSMC1,PSMD12,GMFG,TSC22D3,PSMB1,PSMA6,ENO1,EIF4A1,SERINC3,F2R,PPP1R15A,S100A8,CARHSP1,CORO1A,CDC37,RTKN,RPS15,TIMP1,TCEB2,GAPDH,DNAJA2,GBP2,TXNIP,H2AFZ,GPX1,HSP90AA1,DNAJA1,YWHAH,YWHAZ,YWHAB,UBB,UBE2D3,GABARAPL2,IL18,…
Drug	D015741	Metribolone	CTD	9e-06	48	339	ACTB,ACTG1,AKT1,ALDH9A1,ALDOA,CD200,MMP2,B2M,SH3GLB2,OAZ1,BRMS1,PCMT1,NDUFA3,CAPZB,NCOA1,MAPK3,CREB1,CTNNB1,CTSB,DDX5,DARS,RPL11,RPL3,RPL4,PSMC1,EEF2,ACSL3,JTB,G6PD,XRCC6,RPS6,RPS9,RPS3,FOLH1,RPL24,RPS20,RPS16,TACC1,TALDO1,GSPT1,LSM1,HSP90AA1,EIF3K,VCL,ITGB1,EIF3E,PABPC1,RPSA
Drug	D003474	Curcumin	CTD	1e-05	69	587	MSN,AKT1,AHR,CFLAR,ALDOA,ALOX5,DIABLO,GREM1,ARHGDIB,YPEL3,MMP2,NUP98,BCL2L1,FZD1,CASP2,CAT,CD14,NFKBIA,NFKB1,CDH11,NOTCH1,CD44,RASSF2,CDKN2D,CEBPB,MAP2K3,MAPK3,PRKCD,PGD,CREB1,PFKFB4,ARHGAP30,KLF6,CTNNB1,EIF1,CSK,RARA,ENO1,EIF4G1,PTPN6,FCGR3A,SOD2,SFRS2,SFRS5,SFRS6,S100A9,S100A8,G6PD,XRCC6,RPS6,RPL31,RTKN,LILRB3,TIMP1,TALDO1,NPC2,GPX1,STAT3,STAT5A,UBC,TYROBP,JUND,ITGB1,SUZ12,IL18,IL10,LTB,LCP1,LA…
Drug	D001280	Atrazine	CTD	2.1e-05	25	116	ACHE,AKT1,SEC61A1,NFKB1,CFL1,MAPK3,RARA,RPL6,RPL9,RPL19,RPL18A,EEF2,RPS6,RPS13,RPLP2,RPS2,RPS3A,RPL38,RPL24,RPS25,RPS20,RPS19,RPS17,HBB,TUBA1A
Drug	CID000000784	hydrogen peroxide	Stitch	4.2e-05	112	1185	ACHE,ACTB,ACTG1,ADAR,ADM,AKT1,ALDH9A1,CFLAR,ALOX5,MBP,MDH2,MMP2,ATP6V1B2,ATP6V0C,ATP6V0B,ATP6V1E1,ATP6AP1,PRDX5,BCL2L1,HIST1H3I,CALM2,CALM3,NDUFA1,NDUFA3,CAT,NFE2,NFKBIA,NFKB1,CDH11,PPM1G,KIAA0101,PPP1CA,MAP2K2,MAP2K3,MAPK3,PRKACG,PRKCD,CLCN7,CLIC1,PPP3R1,PPP2CA,GLRX5,CRKL,CREB1,PFDN5,PHF21A,KLF6,CTNNB1,CYBA,ACTR1A,SERPINA1,CSK,H2AFJ,PPP2R2D,NDUFS7,PYCARD,DGUOK,PSMD12,DOCK2,ENO1,QARS,RAC1,RAC2,PT…
Drug	D011441	Propylthiouracil	CTD	5.1e-05	49	368	ADD1,MBP,APCS,MMP2,BTG1,BTF3,MYADM,PTTG1IP,CSDA,NEDD8,MAP2K2,CLCN7,COX4I1,CTNNA1,SLC25A3,CSNK2B,SERPINA1,CSK,RPL11,RPL17,RPL15,RPL3,RPL4,PSMD4,PSMC1,PSMB3,PSMB1,PSMA6,ENO1,EIF4A2,ERP29,SERINC3,PQLC1,RPS6,RPS3A,RPL32,RPL35A,RPS20,RPS14,RPS19,GNB2L1,GAPDH,HBB,GPX1,GPX4,GRINA,UBE2I,UBA52,PABPC1
Drug	D020122	tert-Butylhydroperoxide	CTD	5.2e-05	127	1404	ACHE,ACTB,MSN,ACTN1,ADAR,ADAM8,ADM,ALDOA,ALOX5,GREM1,TMSB10,NUCB1,OAZ1,PRDX5,BCL2L1,ANKMY2,BTG1,BTF3,STK24,PBX2,CSDA,IFITM1,CALM3,OGT,NDUFA3,TPST2,CAV2,CAT,NFKBIA,NFKB1,CDH11,CD68,PPP1CA,ZFYVE16,FAM115A,CEBPB,DAZAP2,MAP2K3,CEP170,MAPK3,SRGN,TMEM66,WDR1,MED16,CREB1,CTNNA1,CTSB,NOC4L,UBE2L6,PDLIM7,DARS,RGS2,NDUFS7,PLAA,RPL5,PSMD12,C17orf62,SEPX1,PSMA6,DOCK2,EMP3,EEF2,PTPRR,ACSL3,ERP29,SOD2,PRR13,PA…
Drug	CID000004584	okadaic acid	Stitch	6.2e-05	78	729	ACTB,ACTG1,AKT1,CFLAR,ALPP,ALPL,MBP,APCS,ATP6V0C,ATP6V0B,DUSP22,BCL2L1,STK24,CAMP,CALM2,CALM3,CACNA1D,CASP2,NFKBIA,NFKB1,PPM1G,PPP1CA,DTX2,MAP2K2,MAP2K3,MAPK3,PRKACG,PRKCD,SRGN,PPP6C,PPP3R1,PPP2CA,CRKL,CREB1,CTDSP2,ZNF655,ACTR1A,PHKA1,PPP2R2D,PSMD4,PSMB10,ROCK2,PSMB6,PSMB4,PSMB3,PSMB1,PSMA6,PTPN6,EEF2,SYCP3,F2R,PPP1R15A,CARHSP1,XRCC6,RPS6,RPS6KA1,RPS6KB2,FOXO3,GNAI2,GYPC,HCLS1,SRF,STAU1,HSP90AA1,…
Drug	D004052	Diethylnitrosamine	CTD	0.000123	64	560	ALDOA,ALPP,ALPL,DIABLO,TMSB10,MGAT1,ATF4,MMP2,BCL2L1,BTF3,IGSF11,CALM2,SEC61A1,CAT,CD14,MAP2K3,PFN1,COX7A2,VKORC1,CTSB,DDB1,PLAA,RPL8,RPL18,RPL3,PSMB10,PTBP1,PSMB3,ENO1,ERP29,SORL1,SOD2,SYCP3,SLC17A3,CCNDBP1,CDC37,RPS6,RPS5,RPS9,RPS10,RPS2,RPS3A,RPS3,RPL32,RPL41,RPL24,RPL27,RPS24,RPS27,RPS29,RPS15,RPS15A,TKT,COQ6,KRTCAP2,TALDO1,SPG7,STAT3,ANP32B,PDCD4,DNAJA1,EIF3K,PABPC1,MAPKAPK3
Drug	D010269	Paraquat	CTD	0.000195	53	431	ACHE,ADAR,AKT1,SQSTM1,DIABLO,ARF1,ARF5,MGAT1,BCL2L1,MYL6,CAT,NFKBIA,NFKB1,CCND3,CEBPB,CFL1,MAP2K3,MAPK3,CLK3,COX7A2,CREB1,PFKFB4,COX5B,COX4I1,CTSB,GSTO1,TSC22D3,ENO1,RAC2,SERINC3,SOD2,SNCA,FTL,G6PD,RPN1,RXRA,TKT,TIMP1,GNAS,GAPDH,HBB,TXNIP,GPX1,GPX4,STAT3,GRIN1,LSM1,HPCAL1,YWHAH,HNRNPD,IGF2R,UBC,TXN
Drug	D007657	Ketone Bodies	CTD	0.000201	57	480	ACTB,BUD31,ARL5A,ALDOA,MBP,APCS,ARF1,MDH2,RHOG,RPL7L1,ATP5B,COLQ,ATP6V0A1,ATP6V1E1,ATP6AP1,GRIPAP1,PLSCR3,CACNA1D,SEC61A1,CAPZB,NCOA1,SYF2,EVL,AP2S1,PPP3R1,PPP2CA,MED16,PFDN5,TSSC4,CTSB,NECAP2,ACTR1A,SLC25A3,DDX5,PLAA,EHMT1,PSMC1,PSMB4,PSMB1,ACSL3,JTB,SAT1,RPS5,MTCH1,MRFAP1,RAB31,RPS19,ATP5L,CIB1,HBXIP,GRINA,PDCD4,CHMP2A,EIF3K,SLC14A2,EIF3E,LASP1
Drug	C016104	sodium bichromate	CTD	0.000253	14	43	AKT1,ATF4,PPP1CA,CTNNA1,SERPINA1,RPS6KA1,RPS3A,GPX1,HSP90AA1,YWHAH,UBC,IL10,ZYX,VEZF1
Drug	D002994	Clofibrate	CTD	0.000279	48	376	ADD1,AHR,APCS,BTF3,MYADM,PTTG1IP,CAT,NFKB1,MAP2K2,COX4I1,CTNNA1,SLC25A3,CSNK2B,SERPINA1,RPL11,RPL17,RPL15,RPL3,RPL4,PSMD4,PSMC1,PSMB4,PSMB3,PSMB1,PSMA6,ENO1,EIF4A2,CCNI,ERP29,SERINC3,PQLC1,RPS6,RPS3A,RPL32,RXRA,RPS20,RPS14,RPS19,MCRS1,GAPDH,HBB,GPX1,GPX4,GRINA,YWHAB,UBA52,TXN,TTR
Drug	CID000002900	cycloheximide	Stitch	0.000336	89	907	ACTB,ACTG1,AKT1,AHR,ALAS2,CFLAR,ALPP,ALPL,ALOX5,RHOA,MMP2,ATP6V0C,OAZ1,BDKRB1,BCL2L1,BTG1,UPF2,CASP2,CASP10,CAT,RPL36,CD14,CD7,NFE2,NFKBIA,NFKB1,CD44,KIAA0101,PPID,POLR2K,CEBPB,MAP2K2,MAP2K3,CCR6,MAPK3,PRKACG,PRKCD,CIRBP,SRGN,CRKL,CREB1,PFKFB4,GJC1,CTSB,ACTR1A,RGS2,RARA,PYCARD,RPL3,ROCK2,PSMA6,EIF4G1,SDC3,EEF2,SORL1,SOD2,SLC2A3,PPP1R15A,SAT1,SAFB,FTL,CCL5,RPS6,RPL32,RPL41,RPL27A,RPS27,TIMP1,GAPDH…
Drug	CID000025959	ferricyanide	Stitch	0.000352	28	161	ACHE,MDH2,ARHGAP4,PRDX5,CALM2,CALM3,NDUFA1,CAT,PRCP,COX7C,COX8A,COX7A2,COX6C,COX6B1,COX5B,COX4I1,CYB5R3,RAC2,SOD2,SDHB,FTL,G6PD,TKT,GAPDH,COQ6,HBQ1,HBA2,HBB
GENE ONTOLOGY CATEGORIES
GO: Molecular Function	GO:0003735	structural constituent of ribosome		0	57	162	RPL7L1,RPL36,RPL10A,RPL6,RPL9,RPL8,RPL11,RPL12,RPL17,RPL15,RPL18,RPL19,RPL18A,RPL3,RPL4,RPL5,FAU,RPL35,RPS6,RPS5,RPS9,RPS12,RPS13,RPS10,RPS11,RPLP1,RPLP2,RPS2,RPS3A,RPS3,RPL31,RPL32,RPL35A,RPL36AL,RPL37A,RPL38,RPL39,RPL41,RPLP0,RPL24,RPL27,RPL27A,RPL30,RPS24,RPS25,RPS20,RPS27,RPS27A,RPS29,RPS15,RPS14,RPS15A,RPS19,RPS16,RPS17,UBA52,RPSA
GO: Molecular Function	GO:0005198	structural molecule activity		0	87	635	ACTB,ACTG1,MSN,ADD1,MBP,RPL7L1,NUP98,MYL6,EIF3B,RPL36,RPL10A,CLTB,ARPC2,ARPC3,ARPC5,CTNNA1,DKFZp686O24166,CYLC1,RPL6,RPL9,RPL8,RPL11,RPL12,RPL17,RPL15,RPL18,RPL19,RPL18A,RPL3,RPL4,RPL5,ROCK2,FAU,RPL35,RPS6,RPS5,RPS9,RPS12,RPS13,RPS10,RPS11,RPLP1,RPLP2,RPS2,RPS3A,RPS3,RPL31,RPL32,RPL35A,RPL36AL,RPL37A,RPL38,RPL39,RPL41,RPLP0,RPL24,RPL27,RPL27A,RPL30,RPS24,RPS25,RPS20,RPS27,RPS27A,RPS29,RPS15,RPS14…
GO: Molecular Function	GO:0003723	RNA binding		0	91	766	ADAR,LRRFIP1,ZC3HAV1,RBM10,PCBP1,PCBP2,CSDA,UPF2,PNPT1,EIF3G,EIF3B,RPL10A,RNASET2,CIRBP,ROD1,RBM22,ZMAT3,RBM5,DDX5,DDX3X,RARA,RPL6,RPL9,RPL8,RPL11,RPL12,RPL15,RPL18,RPL19,RPL18A,RPL3,RPL4,RPL5,PTBP1,PSMA6,QARS,ELAVL3,EIF4A1,EIF4A2,EIF4G1,KIAA0430,FAU,PAPOLA,CPSF4,SFRS2,SFRS5,SFRS6,EIF5AL1,SAFB,RPL35,RPS5,RPS9,RPS13,RPS11,RPLP1,RPLP2,RPS2,RPS3A,RPS3,RPL31,RPL35A,RPL38,RPL39,RPL41,RPLP0,RPL24,RPL27…
GO: Molecular Function	GO:0015078	hydrogen ion transmembrane transporter activity		0	23	100	ATP6V0E1,ATP5B,ATP5A1,ATP5G2,ATP6V1B2,ATP6V0C,ATP5I,ATP6V0B,ATP6V0A1,ATP6V1E1,ATP6AP1,COX7C,COX8A,COX7A2,COX6C,COX6B1,COX5B,COX4I1,ATP6V1G1,SLC9A4,ATP5L,ATP5EP2,UQCRQ
GO: Molecular Function	GO:0015077	monovalent inorganic cation transmembrane transporter activity		6e-06	23	115	ATP6V0E1,ATP5B,ATP5A1,ATP5G2,ATP6V1B2,ATP6V0C,ATP5I,ATP6V0B,ATP6V0A1,ATP6V1E1,ATP6AP1,COX7C,COX8A,COX7A2,COX6C,COX6B1,COX5B,COX4I1,ATP6V1G1,SLC9A4,ATP5L,ATP5EP2,UQCRQ
GO: Molecular Function	GO:0045182	translation regulator activity		6e-06	26	144	AIRE,PCBP1,EIF3D,EIF3G,EIF3H,EIF3B,CIRBP,EIF1,RARA,EEF1A1,EIF4A1,EIF4A2,EIF4G1,EIF4G2,EEF2,EEF1B2,ABTB1,EIF5AL1,RPS9,RPS14,GSPT1,EIF2C2,EIF3K,EIF3E,PABPC1,EIF2AK1
GO: Molecular Function	GO:0008135	translation factor activity, nucleic acid binding		8.9e-05	22	122	PCBP1,EIF3D,EIF3G,EIF3H,EIF3B,EIF1,RARA,EEF1A1,EIF4A1,EIF4A2,EIF4G1,EIF4G2,EEF2,EEF1B2,ABTB1,EIF5AL1,GSPT1,EIF2C2,EIF3K,EIF3E,PABPC1,EIF2AK1
GO: Molecular Function	GO:0022890	inorganic cation transmembrane transporter activity		0.000248	26	172	ATP6V0E1,ATP5B,ATP5A1,ATP5G2,ATP6V1B2,ATP6V0C,ATP5I,ATP6V0B,ATP6V0A1,ATP6V1E1,ATP6AP1,COX7C,COX8A,COX7A2,COX6C,COX6B1,COX5B,SLC25A37,COX4I1,ATP6V1G1,SLC11A1,SNCA,SLC9A4,ATP5L,ATP5EP2,UQCRQ
GO: Biological Process	GO:0006414	translational elongation		0	61	109	RPL36,RPL10A,RPL6,RPL9,RPL8,RPL11,RPL12,RPL17,RPL15,RPL18,RPL19,RPL18A,RPL3,RPL4,RPL5,EEF1A1,EEF2,EEF1B2,FAU,EIF5AL1,RPL35,RPS6,RPS5,RPS9,RPS12,RPS13,RPS10,RPS11,RPLP1,RPLP2,RPS2,RPS3A,RPS3,RPL31,RPL32,RPL35A,RPL37A,RPL38,RPL39,RPL41,RPLP0,RPL24,RPL27,RPL27A,RPL30,RPS24,RPS25,RPS20,RPS27,RPS27A,RPS29,RPS15,RPS14,RPS15A,RPS19,RPS16,RPS17,SRP14,VARS,UBA52,RPSA
GO: Biological Process	GO:0006412	translation		0	93	434	AKT1,MTPN,RPL7L1,NACA,LSM14A,EIF3D,EIF3G,EIF3H,EIF3B,RPL36,RPL10A,PPP1CA,MAPK3,CIRBP,EIF1,DARS,RARA,RPL6,RPL9,RPL8,RPL11,RPL12,RPL17,RPL15,RPL18,RPL19,RPL18A,RPL3,RPL4,RPL5,EEF1A1,QARS,EIF4A1,EIF4A2,EIF4G1,EIF4G2,EEF2,EEF1B2,FAU,ABTB1,EIF5AL1,PPP1R15A,RPL35,RPS6,RPS5,RPS6KB2,RPS9,RPS12,RPS13,RPS10,RPS11,RPLP1,RPLP2,RPS2,RPS3A,RPS3,RPL31,RPL32,RPL35A,RPL36AL,RPL37A,RPL38,RPL39,RPL41,RPLP0,RPL24,RP…
GO: Biological Process	GO:0051128	regulation of cellular component organization		0	97	915	ACHE,ADD1,AKT1,AHR,ALDOA,BIN1,PIAS2,MBP,MTPN,ATP6V0E1,GREM1,ARHGAP4,RHOA,ARHGEF2,TMSB10,BDKRB1,BCL6,ULK1,BTG1,CAPZA2,MYH9,BLZF1,CAV2,CAPZB,EIF3D,EIF3G,EIF3H,EIF3B,CD81,CD44,EVL,ZFYVE16,CHRNA3,CDKN2D,CFL1,PPT1,AP2S1,PPP2CA,PFN1,CREB1,ARPC2,ARPC3,ARPC5,CTNNB1,PML,RASGRP2,ZMAT3,EIF1,DDX5,ARHGAP15,RARA,NTN1,DBNL,ROCK2,DSCAM,ENO1,EMP3,RAB5B,RAC1,FEZ1,EIF4A2,EIF4G1,EIF4G2,FCER1G,SLC11A1,SNCA,SIPA1,EIF5…
GO: Biological Process	GO:0034622	cellular macromolecular complex assembly		0	74	632	ADD1,AHR,APCS,RHOA,TMSB10,NUP98,HIST2H2AC,HIST2H2AA3,HIST1H3I,CAPZA2,LSM14A,NAP1L2,NAP1L4,CAPZB,EIF3D,EIF3G,EIF3H,EIF3B,EVL,CHRNA3,POLR2K,POLR2A,CIRBP,AP2S1,PFN1,MED16,ARPC2,ARPC3,ARPC5,CYBA,EIF1,CSNK2B,RBM5,H2AFJ,NDUFS7,RARA,DIAPH1,DBNL,RAC1,EIF4A2,EIF4G1,EIF4G2,SNRPD2,SFRS5,SFRS6,EIF5AL1,CORO1A,RPS6,RPS5,RPS10,RPS2,RPS3A,RPS3,RPL24,RPS25,RPS15,RPS14,RPS17,TMSB4X,TUBA1B,CD2BP2,HIST1H2BK,H3F3A,H2…
GO: Biological Process	GO:0051246	regulation of protein metabolic process		0	78	687	ACHE,TNFRSF14,ADD1,AKT1,SQSTM1,AIF1,UBE2M,MTPN,RHOA,ARHGEF2,TMSB10,HGS,NRD1,BDKRB1,CAMP,CAPZA2,LSM14A,CAPZB,EIF3D,EIF3G,EIF3H,EIF3B,NFKBIA,NFKB1,CCND3,CD81,UBE2F,CD44,EVL,PPP1CA,CFL1,PIAS4,MAPK3,PRKCD,CIRBP,FEM1A,PPP2CA,PFN1,ARPC2,ARPC3,ARPC5,CTNNB1,EIF1,UBE2L6,RARA,DBNL,RAC1,EIF4A2,EIF4G1,EIF4G2,PTPN6,SNCA,EIF5AL1,PPP1R15A,CORO1A,G6PD,RPS5,AURKAIP1,VPS28,TIMP1,TMSB4X,MGEA5,HCLS1,MKNK2,SRP14,EIF2…
GO: Biological Process	GO:0012501	programmed cell death		0	119	1279	TNFSF14,ACTN1,TNFRSF14,ADAR,ADM,AKT1,SQSTM1,AHR,AIF1,TAX1BP1,CFLAR,UBE2M,DIABLO,GREM1,ARHGAP4,RHOA,ARHGEF2,YPEL3,MMP2,B2M,DUSP22,PRDX5,BCL2L1,BCL6,SH3KBP1,BTG1,TSPO,CSDA,IKBKG,CASP2,CASP10,CAT,CD14,NFKBIA,NFKB1,NOTCH1,CD44,CDKN2D,CEBPB,CFL1,PRKCD,SRGN,PPT1,PPP3R1,PPP2CA,CREB1,PDCD7,CTNNA1,CTNNB1,PML,BCAP31,CTSB,ZMAT3,PIM1,RBM5,RARA,PYCARD,RPL11,NTN1,ARHGEF6,LITAF,TSC22D3,QARS,RAC1,PPM1F,PTPN6,FCE…
GO: Biological Process	GO:0006915	apoptosis		0	118	1265	TNFSF14,ACTN1,TNFRSF14,ADAR,ADM,AKT1,SQSTM1,AHR,AIF1,TAX1BP1,CFLAR,UBE2M,DIABLO,GREM1,ARHGAP4,RHOA,ARHGEF2,YPEL3,MMP2,B2M,DUSP22,PRDX5,BCL2L1,BCL6,SH3KBP1,BTG1,TSPO,CSDA,IKBKG,CASP2,CASP10,CAT,CD14,NFKBIA,NFKB1,NOTCH1,CD44,CDKN2D,CEBPB,CFL1,PRKCD,SRGN,PPT1,PPP3R1,PPP2CA,CREB1,PDCD7,CTNNA1,CTNNB1,PML,BCAP31,CTSB,ZMAT3,PIM1,RBM5,RARA,PYCARD,RPL11,NTN1,ARHGEF6,LITAF,TSC22D3,QARS,RAC1,PPM1F,PTPN6,FCE…
GO: Biological Process	GO:0043933	macromolecular complex subunit organization		0	104	1060	FERMT3,ACHE,ADD1,SQSTM1,AHR,ALOX5AP,APCS,RHOA,ARHGEF2,TMSB10,NUP98,HIST2H2AC,HIST2H2AA3,HIST1H3I,CAPZA2,LSM14A,NAP1L2,NAP1L4,OGT,PDSS2,CAV2,CAPZB,CAT,EIF3D,EIF3G,EIF3H,EIF3B,NFE2,VAMP8,EVL,CHRNA3,POLR2K,POLR2A,CFL1,CIRBP,AP2S1,PFN1,MED16,ARPC2,ARPC3,ARPC5,GJC1,CTNNA1,CTNNB1,PML,CYBA,EIF1,CSNK2B,RBM5,H2AFJ,DARS,NDUFS7,RARA,DIAPH1,DBNL,CAB39,RAC1,EIF4A2,EIF4G1,EIF4G2,SNRPD2,EHD1,SOD2,SYCP3,SFRS5,SF…
GO: Biological Process	GO:0034621	cellular macromolecular complex subunit organization		0	77	689	ADD1,AHR,APCS,RHOA,ARHGEF2,TMSB10,NUP98,HIST2H2AC,HIST2H2AA3,HIST1H3I,CAPZA2,LSM14A,NAP1L2,NAP1L4,CAPZB,EIF3D,EIF3G,EIF3H,EIF3B,NFE2,EVL,CHRNA3,POLR2K,POLR2A,CFL1,CIRBP,AP2S1,PFN1,MED16,ARPC2,ARPC3,ARPC5,CYBA,EIF1,CSNK2B,RBM5,H2AFJ,NDUFS7,RARA,DIAPH1,DBNL,RAC1,EIF4A2,EIF4G1,EIF4G2,SNRPD2,SFRS5,SFRS6,EIF5AL1,CORO1A,RPS6,RPS5,RPS10,RPS2,RPS3A,RPS3,RPL24,RPS25,RPS15,RPS14,RPS17,TMSB4X,TUBA1B,CD2BP2,…
GO: Biological Process	GO:0065003	macromolecular complex assembly		0	98	982	FERMT3,ACHE,ADD1,SQSTM1,AHR,ALOX5AP,APCS,RHOA,TMSB10,NUP98,HIST2H2AC,HIST2H2AA3,HIST1H3I,CAPZA2,LSM14A,NAP1L2,NAP1L4,OGT,PDSS2,CAV2,CAPZB,CAT,EIF3D,EIF3G,EIF3H,EIF3B,VAMP8,EVL,CHRNA3,POLR2K,POLR2A,CIRBP,AP2S1,PFN1,MED16,ARPC2,ARPC3,ARPC5,GJC1,CTNNA1,CTNNB1,PML,CYBA,EIF1,CSNK2B,RBM5,H2AFJ,DARS,NDUFS7,RARA,DIAPH1,DBNL,CAB39,RAC1,EIF4A2,EIF4G1,EIF4G2,SNRPD2,SOD2,SFRS5,SFRS6,EIF5AL1,AKAP2,CORO1A,RPS6…
GO: Biological Process	GO:0022618	ribonucleoprotein complex assembly		0	32	163	LSM14A,EIF3D,EIF3G,EIF3H,EIF3B,CIRBP,EIF1,RBM5,RARA,EIF4A2,EIF4G1,EIF4G2,SNRPD2,SFRS5,SFRS6,EIF5AL1,RPS6,RPS5,RPS10,RPS2,RPS3A,RPS3,RPL24,RPS25,RPS15,RPS14,RPS17,CD2BP2,EIF2C2,EIF3K,EIF3E,EIF2AK1
GO: Biological Process	GO:0032268	regulation of cellular protein metabolic process		0	71	614	ACHE,TNFRSF14,ADD1,AKT1,SQSTM1,AIF1,MTPN,RHOA,ARHGEF2,TMSB10,NRD1,BDKRB1,CAMP,CAPZA2,LSM14A,CAPZB,EIF3D,EIF3G,EIF3H,EIF3B,NFKBIA,NFKB1,CCND3,CD81,CD44,EVL,PPP1CA,CFL1,PIAS4,MAPK3,PRKCD,CIRBP,FEM1A,PPP2CA,PFN1,ARPC2,ARPC3,ARPC5,CTNNB1,EIF1,RARA,DBNL,RAC1,EIF4A2,EIF4G1,EIF4G2,PTPN6,SNCA,EIF5AL1,PPP1R15A,CORO1A,G6PD,RPS5,AURKAIP1,VPS28,TIMP1,TMSB4X,MGEA5,HCLS1,MKNK2,SRP14,EIF2C2,YWHAB,EIF3K,TNRC6A,C…
GO: Biological Process	GO:0042981	regulation of apoptosis		0	98	994	TNFSF14,ACTN1,ADAR,ADM,AKT1,SQSTM1,AIF1,TAX1BP1,CFLAR,UBE2M,DIABLO,ARHGAP4,RHOA,ARHGEF2,MMP2,B2M,PRDX5,BCL2L1,BCL6,BTG1,CSDA,IKBKG,CASP2,CASP10,CAT,NFKBIA,NFKB1,NOTCH1,CD44,CDKN2D,CEBPB,CFL1,PRKCD,PPT1,PPP3R1,PPP2CA,CREB1,PDCD7,CTNNA1,CTNNB1,PML,CTSB,ZMAT3,PIM1,RBM5,RARA,PYCARD,RPL11,ARHGEF6,TSC22D3,QARS,RAC1,PTPN6,FCER1G,SERINC3,SOD2,SNCA,SYCP3,SLC2A3,F2R,IFI6,G6PD,RPS6,FOXO3,MTCH1,RPS3A,RPS3,FG…
GO: Biological Process	GO:0043067	regulation of programmed cell death		0	98	1006	TNFSF14,ACTN1,ADAR,ADM,AKT1,SQSTM1,AIF1,TAX1BP1,CFLAR,UBE2M,DIABLO,ARHGAP4,RHOA,ARHGEF2,MMP2,B2M,PRDX5,BCL2L1,BCL6,BTG1,CSDA,IKBKG,CASP2,CASP10,CAT,NFKBIA,NFKB1,NOTCH1,CD44,CDKN2D,CEBPB,CFL1,PRKCD,PPT1,PPP3R1,PPP2CA,CREB1,PDCD7,CTNNA1,CTNNB1,PML,CTSB,ZMAT3,PIM1,RBM5,RARA,PYCARD,RPL11,ARHGEF6,TSC22D3,QARS,RAC1,PTPN6,FCER1G,SERINC3,SOD2,SNCA,SYCP3,SLC2A3,F2R,IFI6,G6PD,RPS6,FOXO3,MTCH1,RPS3A,RPS3,FG…
GO: Biological Process	GO:0008219	cell death		0	123	1385	TNFSF14,ACTN1,TNFRSF14,ADAR,ADM,AKT1,SQSTM1,AHR,AIF1,TAX1BP1,CFLAR,UBE2M,DIABLO,GREM1,ARHGAP4,RHOA,ARHGEF2,YPEL3,MMP2,B2M,DUSP22,ATP6AP1,PRDX5,BCL2L1,BCL6,SH3KBP1,BTG1,TSPO,CSDA,IKBKG,CASP2,CASP10,CAT,CD14,NFKBIA,NFKB1,NOTCH1,CD44,CDKN2D,CEBPB,CFL1,PRKCD,SRGN,PPT1,PPP3R1,PPP2CA,CREB1,PDCD7,CTNNA1,CTNNB1,PML,BCAP31,CTSB,ZMAT3,PIM1,RBM5,RARA,PYCARD,RPL11,NTN1,ARHGEF6,LITAF,TSC22D3,QARS,RAC1,PPM1F,E…
GO: Biological Process	GO:0016265	death		0	123	1390	TNFSF14,ACTN1,TNFRSF14,ADAR,ADM,AKT1,SQSTM1,AHR,AIF1,TAX1BP1,CFLAR,UBE2M,DIABLO,GREM1,ARHGAP4,RHOA,ARHGEF2,YPEL3,MMP2,B2M,DUSP22,ATP6AP1,PRDX5,BCL2L1,BCL6,SH3KBP1,BTG1,TSPO,CSDA,IKBKG,CASP2,CASP10,CAT,CD14,NFKBIA,NFKB1,NOTCH1,CD44,CDKN2D,CEBPB,CFL1,PRKCD,SRGN,PPT1,PPP3R1,PPP2CA,CREB1,PDCD7,CTNNA1,CTNNB1,PML,BCAP31,CTSB,ZMAT3,PIM1,RBM5,RARA,PYCARD,RPL11,NTN1,ARHGEF6,LITAF,TSC22D3,QARS,RAC1,PPM1F,E…
GO: Biological Process	GO:0010941	regulation of cell death		0	98	1017	TNFSF14,ACTN1,ADAR,ADM,AKT1,SQSTM1,AIF1,TAX1BP1,CFLAR,UBE2M,DIABLO,ARHGAP4,RHOA,ARHGEF2,MMP2,B2M,PRDX5,BCL2L1,BCL6,BTG1,CSDA,IKBKG,CASP2,CASP10,CAT,NFKBIA,NFKB1,NOTCH1,CD44,CDKN2D,CEBPB,CFL1,PRKCD,PPT1,PPP3R1,PPP2CA,CREB1,PDCD7,CTNNA1,CTNNB1,PML,CTSB,ZMAT3,PIM1,RBM5,RARA,PYCARD,RPL11,ARHGEF6,TSC22D3,QARS,RAC1,PTPN6,FCER1G,SERINC3,SOD2,SNCA,SYCP3,SLC2A3,F2R,IFI6,G6PD,RPS6,FOXO3,MTCH1,RPS3A,RPS3,FG…
GO: Biological Process	GO:0002376	immune system process		1e-06	112	1258	TNFSF14,MSN,TNFRSF14,MSH3,ADD1,AKT1,SQSTM1,ALAS2,MBP,AIRE,GREM1,AQP9,ZC3HAV1,ARHGDIB,B2M,BDKRB1,BCL6,IKBKG,MYH9,PGLYRP4,CD14,CD7,CD247,NFKBIA,NFKB1,CCND3,CD97,CD81,NOTCH1,CD44,CEBPB,CCR6,PRKCD,AP2S1,GLRX5,CRKL,KLF6,CTNNB1,PML,BCAP31,CYBA,CSF3R,CSK,RARA,CFC1,DBNL,DEFA1,PSMB10,PSME1,PSMB4,DOCK2,MAP4K2,PTPN6,FCER1G,FCN1,SLC11A1,FCGR3A,LILRA5,SASH3,SOD2,SNCA,LILRB1,IRGM,S100A9,CORO1A,IFI6,G6PD,CCL15,…
GO: Biological Process	GO:0042274	ribosomal small subunit biogenesis		2e-06	10	16	RPS6,RPS10,RPS2,RPS24,RPS25,RPS15,RPS14,RPS19,RPS16,RPS17
GO: Biological Process	GO:0030036	actin cytoskeleton organization		2e-06	44	319	ACTG1,ACTN1,ADD1,AIF1,ALDOA,ARHGDIB,RHOA,RHOG,ARHGEF2,TMSB10,BCL6,CAPZA2,MYH9,CAPZB,EVL,CFL1,CNN2,PFN1,ARPC2,ARPC3,ARPC5,PDLIM7,DIAPH1,DBNL,ROCK2,DOCK2,RAC1,RAC2,PACSIN2,S100A9,AKAP2,CORO1A,FGD3,CAP1,TLN1,TMSB4X,TRPM7,SSH2,SRF,WAS,ARHGEF18,ITGB1,ILK,LCP1
GO: Biological Process	GO:0022613	ribonucleoprotein complex biogenesis		2e-06	41	285	LSM14A,EIF3D,EIF3G,EIF3H,EIF3B,CIRBP,EIF1,RBM5,NOC4L,RARA,RPL11,RPL5,EIF4A2,EIF4G1,EIF4G2,SNRPD2,SFRS5,SFRS6,EIF5AL1,RPS6,RPS5,RPS10,RPS2,RPS3A,RPS3,RPL35A,RPLP0,RPL24,RPS24,RPS25,RPS15,RPS14,RPS19,RPS16,RPS17,CD2BP2,EIF2C2,EIF3K,DDX51,EIF3E,EIF2AK1
GO: Biological Process	GO:0042257	ribosomal subunit assembly		2e-06	7	7	RPS6,RPS10,RPS2,RPL24,RPS25,RPS15,RPS14
GO: Biological Process	GO:0030029	actin filament-based process		5e-06	45	340	ACTG1,ACTN1,ADD1,AIF1,ALDOA,ARHGDIB,RHOA,RHOG,ARHGEF2,TMSB10,BCL6,CAPZA2,MYH9,MYL6,CAPZB,EVL,CFL1,CNN2,PFN1,ARPC2,ARPC3,ARPC5,PDLIM7,DIAPH1,DBNL,ROCK2,DOCK2,RAC1,RAC2,PACSIN2,S100A9,AKAP2,CORO1A,FGD3,CAP1,TLN1,TMSB4X,TRPM7,SSH2,SRF,WAS,ARHGEF18,ITGB1,ILK,LCP1
GO: Biological Process	GO:0044085	cellular component biogenesis		7e-06	119	1401	FERMT3,ACHE,ACTG1,ACTN1,ADD1,SQSTM1,AHR,AIF1,ALOX5AP,APCS,RHOA,TMSB10,NUP98,HIST2H2AC,HIST2H2AA3,HIST1H3I,CAPZA2,MYO1A,LSM14A,NAP1L2,NAP1L4,OGT,PDSS2,CAV2,CAPZB,CAT,EIF3D,EIF3G,EIF3H,EIF3B,VAMP8,EVL,CHRNA3,POLR2K,POLR2A,CIRBP,AP2S1,PFN1,MED16,ARPC2,ARPC3,ARPC5,GJC1,CTNNA1,CTNNB1,PML,CYBA,EIF1,CSNK2B,RBM5,H2AFJ,NOC4L,DARS,NDUFS7,RARA,DIAPH1,RPL11,RPL5,DBNL,CAB39,RAC1,RAC2,EIF4A2,EIF4G1,EIF4G2,SNRP…
GO: Biological Process	GO:0022607	cellular component assembly		1.7e-05	110	1281	FERMT3,ACHE,ACTG1,ACTN1,ADD1,SQSTM1,AHR,AIF1,ALOX5AP,APCS,RHOA,TMSB10,NUP98,HIST2H2AC,HIST2H2AA3,HIST1H3I,CAPZA2,MYO1A,LSM14A,NAP1L2,NAP1L4,OGT,PDSS2,CAV2,CAPZB,CAT,EIF3D,EIF3G,EIF3H,EIF3B,VAMP8,EVL,CHRNA3,POLR2K,POLR2A,CIRBP,AP2S1,PFN1,MED16,ARPC2,ARPC3,ARPC5,GJC1,CTNNA1,CTNNB1,PML,CYBA,EIF1,CSNK2B,RBM5,H2AFJ,DARS,NDUFS7,RARA,DIAPH1,DBNL,CAB39,RAC1,RAC2,EIF4A2,EIF4G1,EIF4G2,SNRPD2,SOD2,SYCP3,SFR…
GO: Biological Process	GO:0043066	negative regulation of apoptosis		2.3e-05	53	459	ADAR,ADM,AKT1,SQSTM1,AIF1,TAX1BP1,CFLAR,RHOA,PRDX5,BCL2L1,BCL6,CSDA,CASP2,CAT,NFKBIA,NFKB1,NOTCH1,CD44,CDKN2D,CEBPB,CFL1,PPT1,CTNNA1,PIM1,RARA,TSC22D3,QARS,FCER1G,SOD2,SNCA,SYCP3,SLC2A3,F2R,IFI6,G6PD,RPS6,PIM2,RTKN,TIMP1,GPX1,SEMA4D,STAT5A,HBXIP,GRIN1,GRINA,YWHAH,YWHAZ,HK1,UBB,TPT1,ILK,IL10,LIG4
GO: Biological Process	GO:0051094	positive regulation of developmental process		2.8e-05	82	867	ACHE,TNFSF14,AKT1,SQSTM1,CFLAR,PIAS2,UBE2M,DIABLO,ARHGAP4,RHOA,ARHGEF2,MMP2,B2M,BCL2L1,BCL6,BTG1,CAMP,IKBKG,CASP2,CASP10,NFKB1,NOTCH1,CD44,CEBPB,PRKCD,PPP3R1,PPP2CA,PDCD7,CTNNB1,PML,ZMAT3,RBM5,PDLIM7,RARA,PYCARD,RPL11,NTN1,ARHGEF6,DSCAM,RAC1,FEZ1,PTPN6,SERINC3,SASH3,CCL5,XRCC6,RPS6,FOXO3,MTCH1,RPS3A,RPS3,FGD3,RXRA,LECT1,TESC,GNAS,STK4,TXNIP,GPX1,SEMA4D,SRF,STAT5A,GRIN1,HSP90AA1,HOXD3,YWHAB,IGF2R,…
GO: Biological Process	GO:0060548	negative regulation of cell death		2.8e-05	54	475	ADAR,ADM,AKT1,SQSTM1,AIF1,TAX1BP1,CFLAR,RHOA,PRDX5,BCL2L1,BCL6,CSDA,CASP2,CAT,NFKBIA,NFKB1,NOTCH1,CD44,CDKN2D,CEBPB,CFL1,PPT1,CTNNA1,CTSB,PIM1,RARA,TSC22D3,QARS,FCER1G,SOD2,SNCA,SYCP3,SLC2A3,F2R,IFI6,G6PD,RPS6,PIM2,RTKN,TIMP1,GPX1,SEMA4D,STAT5A,HBXIP,GRIN1,GRINA,YWHAH,YWHAZ,HK1,UBB,TPT1,ILK,IL10,LIG4
GO: Biological Process	GO:0006413	translational initiation		3.4e-05	19	81	EIF3D,EIF3G,EIF3H,EIF3B,EIF1,RARA,EIF4A2,EIF4G1,EIF4G2,EIF5AL1,RPS5,RPS2,RPS3A,RPS3,RPS17,EIF2C2,EIF3K,EIF3E,EIF2AK1
GO: Biological Process	GO:0043069	negative regulation of programmed cell death		3.9e-05	53	466	ADAR,ADM,AKT1,SQSTM1,AIF1,TAX1BP1,CFLAR,RHOA,PRDX5,BCL2L1,BCL6,CSDA,CASP2,CAT,NFKBIA,NFKB1,NOTCH1,CD44,CDKN2D,CEBPB,CFL1,PPT1,CTNNA1,PIM1,RARA,TSC22D3,QARS,FCER1G,SOD2,SNCA,SYCP3,SLC2A3,F2R,IFI6,G6PD,RPS6,PIM2,RTKN,TIMP1,GPX1,SEMA4D,STAT5A,HBXIP,GRIN1,GRINA,YWHAH,YWHAZ,HK1,UBB,TPT1,ILK,IL10,LIG4
GO: Biological Process	GO:0000028	ribosomal small subunit assembly		5e-05	6	6	RPS6,RPS10,RPS2,RPS25,RPS15,RPS14
GO: Biological Process	GO:0034220	ion transmembrane transport		7.3e-05	17	68	ATP6V0E1,RHOA,ATP5B,ATP5A1,ATP5G2,ATP6V1B2,ATP6V0C,ATP5I,ATP6V0B,ATP6V0A1,ATP6V1E1,ATP6AP1,SLC11A1,GNAI2,ATP5L,ATP5EP2,HK1
GO: Biological Process	GO:0043065	positive regulation of apoptosis		8.3e-05	56	517	TNFSF14,AKT1,SQSTM1,CFLAR,UBE2M,DIABLO,ARHGAP4,RHOA,ARHGEF2,MMP2,B2M,BCL2L1,BCL6,IKBKG,CASP2,CASP10,NOTCH1,CD44,CEBPB,PRKCD,PPP3R1,PPP2CA,PDCD7,CTNNB1,PML,ZMAT3,RBM5,PYCARD,RPL11,ARHGEF6,RAC1,PTPN6,SERINC3,RPS6,FOXO3,MTCH1,RPS3A,RPS3,FGD3,RXRA,STK4,TXNIP,GPX1,STAT5A,GRIN1,YWHAB,IGF2R,UBB,SP110,ARHGEF18,NCSTN,IL18,IL10,LTB,C14orf153,DEDD2
GO: Biological Process	GO:0022604	regulation of cell morphogenesis		8.5e-05	53	477	ACHE,AKT1,ALDOA,PIAS2,MBP,MTPN,ATP6V0E1,GREM1,ARHGAP4,RHOA,BDKRB1,BCL6,ULK1,BTG1,MYH9,BLZF1,CD81,CD44,CHRNA3,CDKN2D,CFL1,PPT1,PPP2CA,CREB1,PML,RASGRP2,ZMAT3,DDX5,ARHGAP15,NTN1,DSCAM,ENO1,EMP3,RAC1,FEZ1,SIPA1,CORO1A,FGD3,ADIPOR1,SPRR1B,SEMA4D,SRF,RASGRP4,GRIN1,HSP90AA1,DNAJB2,YWHAH,ARHGEF18,ITGB2,LST1,ILK,EGLN2,NDEL1
GO: Biological Process	GO:0043068	positive regulation of programmed cell death		0.000102	56	520	TNFSF14,AKT1,SQSTM1,CFLAR,UBE2M,DIABLO,ARHGAP4,RHOA,ARHGEF2,MMP2,B2M,BCL2L1,BCL6,IKBKG,CASP2,CASP10,NOTCH1,CD44,CEBPB,PRKCD,PPP3R1,PPP2CA,PDCD7,CTNNB1,PML,ZMAT3,RBM5,PYCARD,RPL11,ARHGEF6,RAC1,PTPN6,SERINC3,RPS6,FOXO3,MTCH1,RPS3A,RPS3,FGD3,RXRA,STK4,TXNIP,GPX1,STAT5A,GRIN1,YWHAB,IGF2R,UBB,SP110,ARHGEF18,NCSTN,IL18,IL10,LTB,C14orf153,DEDD2
GO: Biological Process	GO:0051704	multi-organism process		0.000136	77	824	TNFRSF14,ADM,CFLAR,BIN1,ZC3HAV1,RHOA,B2M,ATP6V0C,BDKRB1,NUP98,CAMP,IKBKG,UBN1,NACA,PGLYRP4,CD14,CD247,NFKBIA,CD81,HSD17B7,CFL1,PIAS4,MAPK3,AP2S1,CREB1,PHF21A,PML,SERPINA1,DDB1,DDX3X,DEFA3,DEFA1,PSMB10,E4F1,PSMB6,PSMB4,PSMB3,PSMB1,ENO1,EIF4A2,EIF4G1,FCER1G,SLC11A1,FGR,CPSF4,SNCA,LILRB1,F2R,CCL5,RPLP0,PIM2,RXRA,RPS15A,GNAS,TNIP1,HIST1H2BK,NPC2,GPX1,CARM1,STAT3,STAT5A,HBXIP,GRIN1,VIM,HLA-B,HLA-A,IFN…
GO: Biological Process	GO:0010942	positive regulation of cell death		0.000161	56	527	TNFSF14,AKT1,SQSTM1,CFLAR,UBE2M,DIABLO,ARHGAP4,RHOA,ARHGEF2,MMP2,B2M,BCL2L1,BCL6,IKBKG,CASP2,CASP10,NOTCH1,CD44,CEBPB,PRKCD,PPP3R1,PPP2CA,PDCD7,CTNNB1,PML,ZMAT3,RBM5,PYCARD,RPL11,ARHGEF6,RAC1,PTPN6,SERINC3,RPS6,FOXO3,MTCH1,RPS3A,RPS3,FGD3,RXRA,STK4,TXNIP,GPX1,STAT5A,GRIN1,YWHAB,IGF2R,UBB,SP110,ARHGEF18,NCSTN,IL18,IL10,LTB,C14orf153,DEDD2
GO: Biological Process	GO:0044419	interspecies interaction between organisms		0.000215	42	346	TNFRSF14,CFLAR,BIN1,RHOA,ATP6V0C,NUP98,IKBKG,UBN1,NACA,CD247,NFKBIA,CD81,PIAS4,MAPK3,CREB1,PML,DDB1,DDX3X,PSMB10,E4F1,PSMB6,PSMB4,PSMB3,PSMB1,EIF4A2,EIF4G1,CPSF4,RPLP0,RXRA,TNIP1,GPX1,CARM1,STAT3,VIM,HLA-B,HLA-A,UBE2I,SP110,ITGB1,IL10,LYN,ZYX
GO: Biological Process	GO:0015986	ATP synthesis coupled proton transport		0.000296	13	43	ATP6V0E1,ATP5B,ATP5A1,ATP5G2,ATP6V1B2,ATP6V0C,ATP5I,ATP6V0B,ATP6V0A1,ATP6V1E1,ATP6AP1,ATP5L,ATP5EP2
GO: Biological Process	GO:0015985	energy coupled proton transport, down electrochemical gradient		0.000296	13	43	ATP6V0E1,ATP5B,ATP5A1,ATP5G2,ATP6V1B2,ATP6V0C,ATP5I,ATP6V0B,ATP6V0A1,ATP6V1E1,ATP6AP1,ATP5L,ATP5EP2
GO: Biological Process	GO:0048872	homeostasis of number of cells		0.000495	24	144	TNFSF14,ADD1,AKT1,ALAS2,BCL6,IKBKG,CD7,CD44,FCER1G,SASH3,F2R,CORO1A,G6PD,RPS6,FOXO3,RPS24,RPS14,RPS19,RPS17,TIMP1,HBA2,HCLS1,STAT5A,LYN
GO: Biological Process	GO:0046907	intracellular transport		0.000518	83	942	TNFSF14,AKT1,SQSTM1,CHIC2,ARF1,RHOA,ARHGEF2,HGS,ATP5B,ATP5A1,ATP5I,NUP98,BCL2L1,BCL6,PTTG1IP,TSPO,MYH9,MYL6,CALM3,BLZF1,UPF2,SEC61A1,SNX15,GGA1,NFKBIA,STX16,VAMP8,EVL,ZFYVE16,CHML,CFL1,MAPK3,AP2S1,CLTB,SLC25A37,PML,BCAP31,RBM22,ZMAT3,RFX3,RPL11,SEC24C,ERP29,SLC11A1,EHD1,F2R,EIF5AL1,FTL,CDC37,RAB31,RPS15,TOMM7,TUBA1B,GNAS,RAMP2,NDE1,STX5,MGEA5,ATP5L,TXNIP,TAPBP,SPG7,NPC2,SRP14,KIF26B,HSP90AA1,YWHA…
GO: Biological Process	GO:0006119	oxidative phosphorylation		0.000801	20	107	ATP6V0E1,ATP5B,ATP5A1,ATP5G2,ATP6V1B2,ATP6V0C,ATP5I,ATP6V0B,ATP6V0A1,ATP6V1E1,ATP6AP1,NDUFA1,NDUFA3,NDUFA4,NDUFB3,NDUFB8,NDUFS7,SNCA,ATP5L,ATP5EP2
GO: Cellular Component	GO:0022626	cytosolic ribosome		0	51	82	RPL36,RPL6,RPL9,RPL8,RPL11,RPL18,RPL19,RPL18A,RPL3,RPL4,RPL5,FAU,RPL35,FTL,RPS6,RPS5,RPS9,RPS12,RPS13,RPS10,RPS11,RPLP1,RPLP2,RPS2,RPS3A,RPS3,RPL31,RPL32,RPL38,RPL39,RPL41,RPLP0,RPL24,RPL27A,RPL30,RPS24,RPS25,RPS20,RPS27,RPS27A,RPS29,RPS15,RPS14,RPS15A,RPS19,RPS16,RPS17,HBA2,UBB,UBA52,RPSA
GO: Cellular Component	GO:0044445	cytosolic part		0	61	162	PRDX5,IKBKG,RPL36,PFDN5,CTNNB1,PYCARD,RPL6,RPL9,RPL8,RPL11,RPL18,RPL19,RPL18A,RPL3,RPL4,RPL5,CYB5R3,ENO1,FAU,RPL35,FTL,RPS6,RPS5,RPS9,RPS12,RPS13,RPS10,RPS11,RPLP1,RPLP2,RPS2,RPS3A,RPS3,RPL31,RPL32,RPL38,RPL39,RPL41,RPLP0,RPL24,RPL27A,RPL30,RPS24,RPS25,RPS20,RPS27,RPS27A,RPS29,RPS15,RPS14,RPS15A,RPS19,RPS16,RPS17,HBQ1,HBA2,HBB,UBB,UBA52,RPSA,DAPP1
GO: Cellular Component	GO:0033279	ribosomal subunit		0	53	132	RPL7L1,RPL36,RPL6,RPL9,RPL8,RPL11,RPL17,RPL18,RPL19,RPL18A,RPL3,RPL4,RPL5,FAU,RPL35,FTL,RPS6,RPS5,RPS9,RPS12,RPS13,RPS10,RPS11,RPLP1,RPLP2,RPS2,RPS3A,RPS3,RPL31,RPL32,RPL38,RPL39,RPL41,RPLP0,RPL24,RPL27A,RPL30,RPS24,RPS25,RPS20,RPS27,RPS27A,RPS29,RPS15,RPS14,RPS15A,RPS19,RPS16,RPS17,HBA2,UBB,UBA52,RPSA
GO: Cellular Component	GO:0005840	ribosome		0	61	213	RPL7L1,RPL36,RPL10A,RPL6,RPL9,RPL8,RPL11,RPL12,RPL17,RPL15,RPL18,RPL19,RPL18A,RPL3,RPL4,RPL5,FAU,RPL35,FTL,RPS6,RPS6KA1,RPS5,RPS9,RPS12,RPS13,RPS10,RPS11,RPLP1,RPLP2,RPS2,RPS3A,RPS3,RPL31,RPL32,RPL35A,RPL36AL,RPL37A,RPL38,RPL39,RPL41,RPLP0,RPL24,RPL27,RPL27A,RPL30,RPS24,RPS25,RPS20,RPS27,RPS27A,RPS29,RPS15,RPS14,RPS15A,RPS19,RPS16,RPS17,HBA2,UBB,UBA52,RPSA
GO: Cellular Component	GO:0022627	cytosolic small ribosomal subunit		0	28	38	FAU,FTL,RPS6,RPS5,RPS9,RPS12,RPS13,RPS10,RPS11,RPS2,RPS3A,RPS3,RPS24,RPS25,RPS20,RPS27,RPS27A,RPS29,RPS15,RPS14,RPS15A,RPS19,RPS16,RPS17,HBA2,UBB,UBA52,RPSA
GO: Cellular Component	GO:0030529	ribonucleoprotein complex		0	88	544	ACTB,RPL7L1,PCBP1,PCBP2,CSDA,LSM14A,RPL36,RPL10A,SYF2,CIRBP,PDCD7,RBM22,RBM5,NOC4L,DDX5,RPL6,RPL9,RPL8,RPL11,RPL12,RPL17,RPL15,RPL18,RPL19,RPL18A,RPL3,RPL4,RPL5,PTBP1,EEF2,FAU,SNRPD2,SFRS2,EDC4,RPL35,FTL,RPS6,RPS6KA1,RPS5,RPS9,RPS12,RPS13,RPS10,RPS11,RPLP1,RPLP2,RPS2,RPS3A,RPS3,RPL31,RPL32,RPL35A,RPL36AL,RPL37A,RPL38,RPL39,RPL41,RPLP0,RPL24,RPL27,RPL27A,RPL30,RPS24,RPS25,RPS20,RPS27,RPS27A,RPS29,…
GO: Cellular Component	GO:0022625	cytosolic large ribosomal subunit		0	23	39	RPL36,RPL6,RPL9,RPL8,RPL11,RPL18,RPL19,RPL18A,RPL3,RPL4,RPL5,RPL35,RPLP1,RPLP2,RPL31,RPL32,RPL38,RPL39,RPL41,RPLP0,RPL24,RPL27A,RPL30
GO: Cellular Component	GO:0015935	small ribosomal subunit		0	28	64	FAU,FTL,RPS6,RPS5,RPS9,RPS12,RPS13,RPS10,RPS11,RPS2,RPS3A,RPS3,RPS24,RPS25,RPS20,RPS27,RPS27A,RPS29,RPS15,RPS14,RPS15A,RPS19,RPS16,RPS17,HBA2,UBB,UBA52,RPSA
GO: Cellular Component	GO:0015934	large ribosomal subunit		0	25	70	RPL7L1,RPL36,RPL6,RPL9,RPL8,RPL11,RPL17,RPL18,RPL19,RPL18A,RPL3,RPL4,RPL5,RPL35,RPLP1,RPLP2,RPL31,RPL32,RPL38,RPL39,RPL41,RPLP0,RPL24,RPL27A,RPL30
GO: Cellular Component	GO:0031252	cell leading edge		1.4e-05	29	187	AKT1,AIF1,MYH9,MYO1A,CAPZB,EVL,CFL1,ARPC2,ARPC3,ARPC5,CTNNA1,CTNNB1,RASGRP2,PDLIM7,DIAPH1,DBNL,RAC1,APBB1IP,CORO1A,RPS3,FGD3,TESC,TLN1,GNAS,TRPM7,VIM,ITGB1,NDEL1,LCP1
GO: Cellular Component	GO:0016469	proton-transporting two-sector ATPase complex		1.4e-05	14	47	ATP6V0E1,ATP5B,ATP5A1,ATP5G2,ATP6V1B2,ATP6V0C,ATP5I,ATP6V0B,ATP6V0A1,ATP6V1E1,ATP6AP1,ATP6V1G1,ATP5L,ATP5EP2
GO: Cellular Component	GO:0016023	cytoplasmic membrane-bounded vesicle		0.000924	63	704	ACTN1,ALDOA,BIN1,CHIC2,ARHGDIG,ARHGDIB,HGS,DYSF,ATP6V1B2,ATP6V0A1,SH3KBP1,ULK1,CAMP,CAV2,NOTCH1,KIAA0174,SRGN,PPT1,AP2S1,CLK3,CLTB,CTNNA1,CYBA,CTSB,NECAP2,FLOT1,SERPINA1,CYLC1,ATP6V1G1,RAB5B,SEC24C,RAC1,SLC18A1,ERP29,SLC11A1,EHD1,SNCA,RAB11FIP1,IRGM,SLC2A3,SIPA1,PACSIN2,CORO1A,NRSN2,RPN1,TIMP1,TMSB4X,GP9,GNAS,AKAP3,GRIN1,HSP90AA1,HPS1,YWHAZ,YWHAB,IGF2R,TPRG1L,NCSTN,ITGB1,RAB7A,FNBP1,SCYL1,LAMP1
HUMAN PHENOTYPES AND DISEASES
Human Phenotype	HP:0001871	Hematological abnormality		9e-06	49	469	ALAS2,ALDOA,ALPL,CHIC2,AIRE,B2M,IKBKG,MYH9,CASP10,CD247,CLCN7,PGD,GLRX5,COX6B1,VKORC1,CSF2RA,RARA,DGUOK,CYB5R3,FCGR3A,SELL,G6PD,PADI4,RPS19,GP9,TPI1,HBA2,HBB,NPC2,GPX1,AKR1D1,STAT3,HPS1,HK1,CFH,WAS,IFNGR1,IFNGR2,CDAN1,SP110,ITGB2,ITGAX,ISCU,IL10,LYL1,BCAM,LIG4,UQCRQ,KRT9
Human Phenotype	HP:0001878	Hemolytic anemia		0.015257	13	67	ALDOA,CASP10,CD247,FCGR3A,G6PD,TPI1,HBA2,HBB,GPX1,HK1,CFH,WAS,ITGAX
Human Phenotype	HP:0001897	Normocytic anemia		0.036406	4	5	ALDOA,G6PD,TPI1,HK1
Disease	D029503	Anemia, Diamond-Blackfan	CTD	0.000297	6	8	RPL11,RPL5,RPL35A,RPS24,RPS19,RPS17
Disease	D015473	Leukemia, Promyelocytic, Acute	CTD	0.004259	6	11	AKT1,CD44,PML,RARA,ITGB2,ITGAX
MOLECULAR AND CELLULAR PATHWAYS
Pathway	72766	Translation	Reactome	0	68	118	EIF3D,EIF3G,EIF3H,EIF3B,RPL36,RPL10A,RPL6,RPL9,RPL8,RPL11,RPL12,RPL17,RPL15,RPL18,RPL19,RPL18A,RPL3,RPL4,RPL5,EEF1A1,EIF4A1,EIF4A2,EIF4G1,EEF2,EEF1B2,FAU,RPL35,RPS6,RPS5,RPS9,RPS12,RPS13,RPS10,RPS11,RPLP1,RPLP2,RPS2,RPS3A,RPS3,RPL31,RPL32,RPL35A,RPL37A,RPL38,RPL39,RPL41,RPLP0,RPL24,RPL27,RPL27A,RPL30,RPS24,RPS25,RPS20,RPS27,RPS27A,RPS29,RPS15,RPS14,RPS15A,RPS19,RPS16,RPS17,EIF3K,UBA52,EIF3E,PABPC…
Pathway	RIBOSOMAL_PROTEINS	RIBOSOMAL_PROTEINS	MSigDB	0	58	106	RPL36,RPL6,RPL9,RPL8,RPL11,RPL12,RPL17,RPL15,RPL18,RPL19,RPL18A,RPL3,RPL4,RPL5,TBC1D10C,FAU,RPL35,RPS6,RPS6KA1,RPS5,RPS6KB2,RPS9,RPS12,RPS13,RPS10,RPS11,RPLP1,RPLP2,RPS2,RPS3A,RPS3,RPL31,RPL32,RPL35A,RPL38,RPL39,RPL41,RPLP0,RPL24,RPL27,RPL27A,RPL30,RPS24,RPS25,RPS20,RPS27,RPS27A,RPS29,RPS15,RPS14,RPS19,RPS16,RPS17,LOC388720,UBB,UBC,UBA52,RPSA
Pathway	hsa03010	Ribosome	KEGG pathway	0	55	102	RPL10A,RPL6,RPL9,RPL8,RPL11,RPL12,RPL17,RPL15,RPL18,RPL19,RPL18A,RPL3,RPL4,RPL5,FAU,RPL35,RPS6,RPS5,RPS9,RPS12,RPS13,RPS10,RPS11,RPLP1,RPLP2,RPS2,RPS3A,RPS3,RPL31,RPL32,RPL35A,RPL36AL,RPL37A,RPL38,RPL39,RPL41,RPLP0,RPL24,RPL27,RPL27A,RPL30,RPS24,RPS25,RPS20,RPS27,RPS27A,RPS29,RPS15,RPS15A,RPS19,RPS16,LOC388720,UBA52,LOC440733,RPSA
Pathway	74160	Gene Expression	Reactome	0	84	269	PCBP1,PCBP2,EIF3D,EIF3G,EIF3H,EIF3B,RPL36,RPL10A,POLR2K,POLR2A,RBM5,RPL6,RPL9,RPL8,RPL11,RPL12,RPL17,RPL15,RPL18,RPL19,RPL18A,RPL3,RPL4,RPL5,EEF1A1,PTBP1,EIF4A1,EIF4A2,EIF4G1,EEF2,EEF1B2,FAU,SNRPD2,PAPOLA,SFRS2,SFRS5,SFRS6,RPL35,RPS6,RPS5,RPS9,RPS12,RPS13,RPS10,RPS11,RPLP1,RPLP2,RPS2,RPS3A,RPS3,RPL31,RPL32,RPL35A,RPL37A,RPL38,RPL39,RPL41,RPLP0,RPL24,RPL27,RPL27A,RPL30,RPS24,RPS25,RPS20,RPS27,RPS2…
Pathway	OXIDATIVE_PHOSPHORYLATION	OXIDATIVE_PHOSPHORYLATION	MSigDB	7.3e-05	19	63	ATP6V0E1,ATP6V1B2,ATP6V0C,ATP6V0B,ATP6V0A1,ATP6V1E1,ATP6AP1,NDUFA1,NDUFA4,COX7C,COX8A,COX7A2,COX6C,COX6B1,COX5B,COX4I1,ATP6V1G1,SDHB,PPA2
Pathway	hsa00190	Oxidative phosphorylation	KEGG pathway	0.000231	29	139	ATP6V0E1,ATP5B,ATP5A1,ATP5G2,ATP6V1B2,ATP6V0C,ATP5I,ATP6V0B,ATP6V0A1,ATP6V1E1,ATP6AP1,NDUFA1,NDUFA3,NDUFA4,NDUFB3,NDUFB8,COX7C,COX8A,COX7A2,COX6C,COX6B1,COX5B,COX4I1,NDUFS7,ATP6V1G1,SDHB,ATP5L,UQCRQ,PPA2

## Sheet: PC4 MN NLP5
TOPPFUN OUTPUT FOR ALL TRANSCRIPTS AT NLP>5 (P<0.00001) FOR PC4 in MN study
				P-value	Hits in List	Count in DB	Targets
TRANSCRIPTION FACTOR BINDING SITES
TFBS	RYTTCCTG_V$ETS2_B	RYTTCCTG_V$ETS2_B		0.010773	82	869	FCER1G,FERMT3,SLPI,KLHL3,FGR,CRADD,ADAM15,SOS2,PLEKHA1,ETS1,FBXL5,BIN1,PSTPIP1,MAP4K1,ARF4,ARRB2,FLT3LG,MID1,MLLT6,MMP9,TGM3,GK,QPCT,BCL3,BCL6,BMX,CA4,CANX,TGIF2,YARS,GRAP,RUNX3,NCF4,PPP1R16B,CBLB,TUSC4,NEDD4,FKBP9L,SPTAN1,CD6,CD5,STX11,ATL3,SS18,EVL,CEBPE,GAB2,CITED4,PRKCH,IL1RN,IL7R,SSBP4,RBPJ,AIG1,PLCG1,GPR97,CD96,MAPK14,PIK3R1,ZNF410,CSF3R,NCALD,ARHGAP15,RALGDS,RALB,ITPR3,KLF12,DNMT1,IL11RA,T…
MICRO RNA BINDING SITES
None
DRUGS
Drug	CID000000718	fructose 1,6-bisphosphate	Stitch	0	36	151	ALDOA,AMPD3,ME2,G6PD,APRT,MGAM,GK,PGAM4,TPI1,GAPDH,MAEA,GBA,GBE1,PGM2,HP,PRPS1,HK3,PGK1,PGD,PGAM1,PFKP,PFKFB2,UGP2,PFKFB3,PFKFB4,TXN,PECR,TM9SF2,RPE,EXOSC8,INPP1,IMPA2,LRG1,LDHB,LDHA,PYGL
Drug	D002995	Clofibric Acid	CTD	0.002827	71	666	SLC27A2,NOL6,ACOX1,PUS1,ZMIZ2,PARP1,ADSS,ETS2,CDC16,ZMYND11,ALDOA,APH1B,ST6GAL1,WDR6,APP,SDHA,CLYBL,APRT,TYSND1,RPS6,POLR3A,RPS3A,DDX56,ATP1A1,ATIC,DCAKD,RPS27,RPS15A,RPS18,HSD17B11,NOL8,INSIG2,CEACAM1,PRDX5,LANCL1,AGTRAP,BPHL,TFF3,RGS19,NCL,NDUFB3,NDUFS3,AGPAT2,PPAP2B,PDCD4,PRMT1,UBL3,MAP1LC3A,CTSC,PGAM1,UGP2,THOC1,TC2N,SPG21,OPTN,TRAP1,NSUN5,PLAU,DDX39,POLR1E,MFHAS1,RPL13,RPL5,IMP4,MRPS18B,SLC1…
Drug	CID000000804	inosine	Stitch	0.00479	30	193	AARS,ACAA1,ADA,ADARB1,ADSS,AK1,AMPD3,G6PD,APRT,MGAM,ATIC,BST1,AGPS,CAPN3,ENTPD1,CDA,PRPS1,HK3,PFKP,PFKFB2,PFKFB3,PFKFB4,DACH1,RNASEN,ITPA,RDH14,INPP1,IMPDH1,TRMT5,PYGL
Drug	D018038	Sodium Selenite	CTD	0.028257	106	1188	ZDHHC13,ASCC3,PUS1,PRR13,TNFRSF25,PARP1,FBL,SDCCAG3,FBXL5,DDX18,RPP40,ZMYND11,MATK,MAFG,SORT1,WDR6,BAZ1A,APRT,WDR74,MGST1,ZMYM6,RPS3A,RPL37A,VAT1,PLA2G4B,GTPBP6,ARIH2,PRDX5,BCL2,PLSCR3,GLOD4,MYC,ZZZ3,PGM2,ICOS,RUNX3,NCL,TUSC4,NDUFS3,C20orf3,RPL10A,GRK6,CD2,ELP3,ERLIN1,GSK3B,STAT3,NME3,SKAP1,SS18,CHMP2A,RRAGC,CEBPE,MTP18,CHSY1,ZAP70,MAP2K1,MAPK1,CITED4,PRKCD,RAB21,KBTBD11,PPP2R4,ATP6V0E2,DDX47,SIR…
Drug	D004052	Diethylnitrosamine	CTD	0.039778	59	560	SLC27A2,NOL6,ACOX1,PUS1,PARP1,ZMYND11,ALDOA,APH1B,ST6GAL1,WDR6,APP,CLYBL,APRT,RPS6,MGST2,POLR3A,RPS3A,DDX56,ATP1A1,ATIC,DCAKD,RPS27,MMP9,RPS15A,RPS18,NOL8,INSIG2,BCL2,LANCL1,AGTRAP,BPHL,TFF3,MYC,NDUFS3,STAT3,PPAP2B,PDCD4,PRMT1,UBL3,MAP1LC3A,CTSC,PRKCH,PGAM1,TC2N,OPTN,TRAP1,NSUN5,POLR1E,MFHAS1,RPL13,IMP4,MRPS18B,SLC16A10,SMAD3,POLR1C,LTC4S,RAB3D,NUP210,LAMP2
Drug	CID000000603	fructose 6-phosphate	Stitch	0.045411	25	162	AK1,ALDOA,G6PD,MGAM,GK,PGAM4,TPI1,GAPDH,MAEA,GBE1,PGM2,LRBA,PRPS1,HK3,PGD,PFKP,PFKFB2,UGP2,PFKFB3,PFKFB4,RPE,IMPA2,LDHB,LDHA,PYGL
GENE ONTOLOGY CATEGORIES
GO: Biological Process	GO:0001775	cell activation		0	67	471	FCER1G,FERMT3,TOLLIP,FCGR2A,TNFSF14,ADAM9,TNFRSF14,ADA,IL21R,MALT1,FKBP1A,SKAP2,ANXA3,FYN,RPS6,FLT3LG,ATM,WWP1,DNAJA3,AZU1,TLR5,TLR4,BCL2,BCL3,BCL6,TCF3,LAX1,BPI,CBLB,CD40LG,ENTPD1,CD27,CD7,CD8A,CD5,CD3G,CD2,CD3D,BCL11B,CD81,EVL,GIMAP5,GAB2,ZAP70,HLX,PRKCQ,PRKCD,IL7R,RBPJ,PLSCR1,PIK3R1,JAK2,PRAM1,ITGAM,IMPDH1,IL11RA,TREML2,SMAD3,LTB,LTA,CD24,CXCR4,RAB27A,LCK,CARD11,PTPRE,LAT
GO: Biological Process	GO:0045321	leukocyte activation		0	60	421	FCER1G,TOLLIP,FCGR2A,TNFSF14,ADAM9,TNFRSF14,ADA,IL21R,MALT1,FKBP1A,SKAP2,ANXA3,FYN,RPS6,FLT3LG,ATM,WWP1,DNAJA3,AZU1,TLR5,TLR4,BCL2,BCL3,BCL6,TCF3,LAX1,BPI,CBLB,CD40LG,CD27,CD7,CD8A,CD5,CD3G,CD2,CD3D,BCL11B,CD81,GIMAP5,GAB2,ZAP70,HLX,PRKCQ,PRKCD,IL7R,RBPJ,PIK3R1,PRAM1,ITGAM,IMPDH1,IL11RA,TREML2,SMAD3,CD24,CXCR4,RAB27A,LCK,CARD11,PTPRE,LAT
GO: Biological Process	GO:0002376	immune system process		0	121	1258	FCAR,FCER1G,TOLLIP,FCGR2A,TNFSF14,PRDX3,ADAM9,TNFRSF14,ADA,IL21R,MALT1,FKBP1A,PLEKHA1,SKAP2,ADSS,JAG1,ETS1,F12,ST6GAL1,ANXA3,CLEC4D,CLEC5A,PGLYRP1,G6PD,FYN,CCL5,RPS6,ARRB2,FAIM3,FLT3LG,POLR3A,ATM,WWP1,MMP9,RPS14,DNAJA3,CKLF,AZU1,THBS4,TLR5,TLR4,LIME1,TNFRSF1A,BCL2,BCL3,OLR1,BCL6,BST1,ORM1,ORM2,TCF3,LAX1,BPI,MAEA,FSTL3,ICOS,NCF4,CBLB,TAZ,CD40LG,CD27,CD7,CD8A,CD5,CD247,CD3G,CD2,CD3D,BCL11B,SKAP1,CD…
GO: Biological Process	GO:0006917	induction of apoptosis		0	52	379	ARHGEF3,FADD,TNFRSF10B,FCGR2A,TNFSF14,CRADD,SOS2,TNFRSF25,NAE1,APH1B,APAF1,MAL,SORT1,APP,DAPK2,ARRB2,RPS3A,ATM,VAV3,SH3GLB1,BCL3,DYRK2,MYC,RUNX3,CUL4A,NDUFS3,CD27,CD5,CD2,GSK3B,NME3,GIMAP5,PLEKHF1,ARHGEF11,MAPK1,PRKCD,PRKCA,IL7R,PDCD7,EAF2,ARHGEF18,JAK2,SH2D1A,MAGED1,SMAD3,PTEN,LTB,LTA,CD24,TP53I3,RAB27A,LCK
GO: Biological Process	GO:0012502	induction of programmed cell death		0	52	380	ARHGEF3,FADD,TNFRSF10B,FCGR2A,TNFSF14,CRADD,SOS2,TNFRSF25,NAE1,APH1B,APAF1,MAL,SORT1,APP,DAPK2,ARRB2,RPS3A,ATM,VAV3,SH3GLB1,BCL3,DYRK2,MYC,RUNX3,CUL4A,NDUFS3,CD27,CD5,CD2,GSK3B,NME3,GIMAP5,PLEKHF1,ARHGEF11,MAPK1,PRKCD,PRKCA,IL7R,PDCD7,EAF2,ARHGEF18,JAK2,SH2D1A,MAGED1,SMAD3,PTEN,LTB,LTA,CD24,TP53I3,RAB27A,LCK
GO: Biological Process	GO:0046649	lymphocyte activation		0	49	349	TNFSF14,TNFRSF14,ADA,IL21R,MALT1,FKBP1A,SKAP2,FYN,RPS6,FLT3LG,ATM,WWP1,DNAJA3,TLR4,BCL2,BCL3,BCL6,TCF3,LAX1,CBLB,CD40LG,CD27,CD7,CD8A,CD5,CD3G,CD2,CD3D,BCL11B,CD81,GIMAP5,ZAP70,HLX,PRKCQ,PRKCD,IL7R,RBPJ,PIK3R1,ITGAM,IMPDH1,IL11RA,TREML2,SMAD3,CD24,CXCR4,RAB27A,LCK,CARD11,LAT
GO: Biological Process	GO:0043067	regulation of programmed cell death		2e-06	98	1006	ARHGEF3,FCER1G,AARS,FADD,DNAJC5,TNFRSF10B,FCGR2A,TNFSF14,CRADD,PRDX3,SOS2,ADAM9,ADA,TNFRSF25,MALT1,IER3,ETS1,NAE1,APH1B,APAF1,MAL,SORT1,APP,DAPK2,G6PD,RPS6,ARRB2,FAIM3,RPS3A,ATM,GSPT2,MMP9,DNAJA3,VAV3,AZU1,TLR4,GNAQ,PRDX5,SH3GLB1,BCL2,BCL3,BCL6,DYRK2,NLRP12,BNIP2,MAEA,TGFA,MYC,RUNX3,CUL4A,NDUFS3,CD40LG,CD27,CD5,CD3G,CD2,BCL11B,STAMBP,GSK3B,ATG7,NME3,NLRC4,GIMAP5,PLEKHF1,HSPB1,ARHGEF11,MAPK1,PRKCD…
GO: Biological Process	GO:0010941	regulation of cell death		3e-06	98	1017	ARHGEF3,FCER1G,AARS,FADD,DNAJC5,TNFRSF10B,FCGR2A,TNFSF14,CRADD,PRDX3,SOS2,ADAM9,ADA,TNFRSF25,MALT1,IER3,ETS1,NAE1,APH1B,APAF1,MAL,SORT1,APP,DAPK2,G6PD,RPS6,ARRB2,FAIM3,RPS3A,ATM,GSPT2,MMP9,DNAJA3,VAV3,AZU1,TLR4,GNAQ,PRDX5,SH3GLB1,BCL2,BCL3,BCL6,DYRK2,NLRP12,BNIP2,MAEA,TGFA,MYC,RUNX3,CUL4A,NDUFS3,CD40LG,CD27,CD5,CD3G,CD2,BCL11B,STAMBP,GSK3B,ATG7,NME3,NLRC4,GIMAP5,PLEKHF1,HSPB1,ARHGEF11,MAPK1,PRKCD…
GO: Biological Process	GO:0043065	positive regulation of apoptosis		4e-06	61	517	ARHGEF3,FADD,TNFRSF10B,FCGR2A,TNFSF14,CRADD,SOS2,TNFRSF25,NAE1,APH1B,APAF1,MAL,SORT1,APP,DAPK2,RPS6,ARRB2,RPS3A,ATM,MMP9,VAV3,TLR4,SH3GLB1,BCL2,BCL3,BCL6,DYRK2,MYC,RUNX3,CUL4A,NDUFS3,CD27,CD5,CD2,GSK3B,NME3,NLRC4,GIMAP5,PLEKHF1,ARHGEF11,MAPK1,PRKCD,PRKCA,PPP3CC,IL7R,PDCD7,EAF2,ARHGEF18,JAK2,SCRIB,SH2D1A,MAGED1,SMAD3,PTEN,LTB,LTA,CD24,TP53I3,LDHA,RAB27A,LCK
GO: Biological Process	GO:0042981	regulation of apoptosis		4e-06	96	994	ARHGEF3,FCER1G,AARS,FADD,DNAJC5,TNFRSF10B,FCGR2A,TNFSF14,CRADD,PRDX3,SOS2,ADAM9,ADA,TNFRSF25,MALT1,IER3,ETS1,NAE1,APH1B,APAF1,MAL,SORT1,APP,DAPK2,G6PD,RPS6,ARRB2,FAIM3,RPS3A,ATM,GSPT2,MMP9,DNAJA3,VAV3,AZU1,TLR4,GNAQ,PRDX5,SH3GLB1,BCL2,BCL3,BCL6,DYRK2,NLRP12,BNIP2,MAEA,TGFA,MYC,RUNX3,CUL4A,NDUFS3,CD40LG,CD27,CD5,CD3G,CD2,BCL11B,STAMBP,GSK3B,ATG7,NME3,NLRC4,GIMAP5,PLEKHF1,HSPB1,ARHGEF11,MAPK1,PRKCD…
GO: Biological Process	GO:0043068	positive regulation of programmed cell death		4e-06	61	520	ARHGEF3,FADD,TNFRSF10B,FCGR2A,TNFSF14,CRADD,SOS2,TNFRSF25,NAE1,APH1B,APAF1,MAL,SORT1,APP,DAPK2,RPS6,ARRB2,RPS3A,ATM,MMP9,VAV3,TLR4,SH3GLB1,BCL2,BCL3,BCL6,DYRK2,MYC,RUNX3,CUL4A,NDUFS3,CD27,CD5,CD2,GSK3B,NME3,NLRC4,GIMAP5,PLEKHF1,ARHGEF11,MAPK1,PRKCD,PRKCA,PPP3CC,IL7R,PDCD7,EAF2,ARHGEF18,JAK2,SCRIB,SH2D1A,MAGED1,SMAD3,PTEN,LTB,LTA,CD24,TP53I3,LDHA,RAB27A,LCK
GO: Biological Process	GO:0010942	positive regulation of cell death		7e-06	61	527	ARHGEF3,FADD,TNFRSF10B,FCGR2A,TNFSF14,CRADD,SOS2,TNFRSF25,NAE1,APH1B,APAF1,MAL,SORT1,APP,DAPK2,RPS6,ARRB2,RPS3A,ATM,MMP9,VAV3,TLR4,SH3GLB1,BCL2,BCL3,BCL6,DYRK2,MYC,RUNX3,CUL4A,NDUFS3,CD27,CD5,CD2,GSK3B,NME3,NLRC4,GIMAP5,PLEKHF1,ARHGEF11,MAPK1,PRKCD,PRKCA,PPP3CC,IL7R,PDCD7,EAF2,ARHGEF18,JAK2,SCRIB,SH2D1A,MAGED1,SMAD3,PTEN,LTB,LTA,CD24,TP53I3,LDHA,RAB27A,LCK
GO: Biological Process	GO:0042110	T cell activation		1.6e-05	36	237	TNFSF14,TNFRSF14,ADA,MALT1,FKBP1A,FYN,RPS6,WWP1,DNAJA3,BCL2,BCL3,BCL6,LAX1,CBLB,CD27,CD7,CD8A,CD5,CD3G,CD2,CD3D,BCL11B,GIMAP5,ZAP70,HLX,PRKCQ,IL7R,ITGAM,TREML2,SMAD3,CD24,CXCR4,RAB27A,LCK,CARD11,LAT
GO: Biological Process	GO:0012501	programmed cell death		2.2e-05	113	1279	ARHGEF3,FCER1G,AARS,FADD,DNAJC5,TNFRSF10B,FCGR2A,TNFSF14,CRADD,PRDX3,SOS2,ADAM9,TNFRSF14,ADA,TNFRSF25,MALT1,C11orf82,IER3,ETS1,NAE1,APH1B,APAF1,MAL,SORT1,APP,DAPK2,PGLYRP1,G6PD,RPS6,ARRB2,FAIM3,RPS3A,ATM,GSPT2,MMP9,DNAJA3,VAV3,AZU1,TLR4,DUSP22,TNFRSF1A,GNAQ,PRDX5,SH3GLB1,BCL2,BCL3,BCL6,RTN3,DYRK2,NLRP12,BNIP2,MAEA,TSPO,TGFA,MYC,YARS,RHOT1,RUNX3,CUL4A,NDUFS3,CD40LG,CD27,CD5,CD3G,CD2,BCL11B,STAMBP,…
GO: Biological Process	GO:0006915	apoptosis		2.3e-05	112	1265	ARHGEF3,FCER1G,AARS,FADD,DNAJC5,TNFRSF10B,FCGR2A,TNFSF14,CRADD,PRDX3,SOS2,ADAM9,TNFRSF14,ADA,TNFRSF25,MALT1,C11orf82,IER3,ETS1,NAE1,APH1B,APAF1,MAL,SORT1,APP,DAPK2,PGLYRP1,G6PD,RPS6,ARRB2,FAIM3,RPS3A,ATM,GSPT2,MMP9,DNAJA3,VAV3,AZU1,TLR4,DUSP22,TNFRSF1A,GNAQ,PRDX5,SH3GLB1,BCL2,BCL3,BCL6,RTN3,DYRK2,NLRP12,BNIP2,MAEA,TSPO,TGFA,MYC,YARS,RHOT1,RUNX3,CUL4A,NDUFS3,CD40LG,CD27,CD5,CD3G,CD2,BCL11B,STAMBP,…
GO: Biological Process	GO:0008219	cell death		4.1e-05	119	1385	ARHGEF3,FCER1G,AARS,FADD,DNAJC5,TNFRSF10B,FCGR2A,TNFSF14,CRADD,PRDX3,SOS2,ADAM9,TNFRSF14,ADA,TNFRSF25,MALT1,C11orf82,IER3,ETS1,NAE1,APH1B,APAF1,MAL,SORT1,APP,DAPK2,PGLYRP1,G6PD,RPS6,ARRB2,FAIM3,RPS3A,ATM,GSPT2,MMP9,DNAJA3,VAV3,AZU1,TLR4,DUSP22,AXIN2,TNFRSF1A,GNAQ,PRDX5,SH3GLB1,BCL2,BCL3,OLR1,BCL6,RTN3,DYRK2,NLRP12,BNIP2,MAEA,TSPO,TGFA,MYC,GZMM,YARS,RHOT1,RUNX3,CUL4A,NDUFS3,CD40LG,CD27,CD5,CD3G,CD…
GO: Biological Process	GO:0016265	death		5.1e-05	119	1390	ARHGEF3,FCER1G,AARS,FADD,DNAJC5,TNFRSF10B,FCGR2A,TNFSF14,CRADD,PRDX3,SOS2,ADAM9,TNFRSF14,ADA,TNFRSF25,MALT1,C11orf82,IER3,ETS1,NAE1,APH1B,APAF1,MAL,SORT1,APP,DAPK2,PGLYRP1,G6PD,RPS6,ARRB2,FAIM3,RPS3A,ATM,GSPT2,MMP9,DNAJA3,VAV3,AZU1,TLR4,DUSP22,AXIN2,TNFRSF1A,GNAQ,PRDX5,SH3GLB1,BCL2,BCL3,OLR1,BCL6,RTN3,DYRK2,NLRP12,BNIP2,MAEA,TSPO,TGFA,MYC,GZMM,YARS,RHOT1,RUNX3,CUL4A,NDUFS3,CD40LG,CD27,CD5,CD3G,CD…
GO: Biological Process	GO:0002768	immune response-regulating cell surface receptor signaling pathway		0.00027	16	63	FCER1G,ADA,MALT1,PLEKHA1,FYN,LAX1,CBLB,CD247,SKAP1,ZAP70,MAPK1,UBASH3A,SPG21,PLCG1,CD24,LCK
GO: Biological Process	GO:0006955	immune response		0.000274	79	832	FCAR,FCER1G,TOLLIP,FCGR2A,TNFSF14,TNFRSF14,ADA,MALT1,FKBP1A,PLEKHA1,ETS1,F12,ST6GAL1,ANXA3,CLEC4D,CLEC5A,PGLYRP1,FYN,CCL5,RPS6,ARRB2,FAIM3,POLR3A,TLR5,TLR4,LIME1,TNFRSF1A,BCL2,BCL3,OLR1,BCL6,BST1,TCF3,LAX1,BPI,ICOS,NCF4,CBLB,CD40LG,CD27,CD7,CD8A,CD247,SKAP1,CEACAM8,GIMAP5,GAB2,CTSC,ZAP70,HLX,LTB4R,MAPK1,PRKCD,UBASH3A,IL1RN,CFP,IL7R,SPG21,TLR8,PLSCR1,PLCG1,CD96,IL32,NLRX1,PRAM1,DBNL,SH2D1A,SMAD3,L…
GO: Biological Process	GO:0050851	antigen receptor-mediated signaling pathway		0.000353	14	49	ADA,MALT1,PLEKHA1,FYN,LAX1,CBLB,CD247,SKAP1,ZAP70,MAPK1,UBASH3A,SPG21,PLCG1,LCK
GO: Biological Process	GO:0002682	regulation of immune system process		0.000409	54	493	FCER1G,FCGR2A,TNFSF14,TNFRSF14,ADA,MALT1,FKBP1A,PLEKHA1,JAG1,ETS1,FYN,CCL5,ARRB2,DNAJA3,THBS4,TLR5,TLR4,BCL6,ORM1,ORM2,LAX1,BPI,FSTL3,CBLB,CD40LG,CD27,CD5,CD247,CD2,SKAP1,CD81,GIMAP5,GAB2,ZAP70,HLX,PRKCQ,MAPK1,UBASH3A,CFP,IL7R,SPG21,TLR8,PLCG1,MAPK14,PIK3R1,PRAM1,SH2D1A,SMAD3,LTA,CD24,LCK,CARD11,PTPRE,LAT
GO: Biological Process	GO:0046651	lymphocyte proliferation		0.000467	25	148	TNFSF14,TNFRSF14,ADA,MALT1,FKBP1A,FYN,RPS6,DNAJA3,TLR4,BCL2,BCL6,CBLB,CD40LG,CD27,CD5,CD81,ZAP70,PRKCQ,PRKCD,IL7R,ITGAM,IMPDH1,CD24,CXCR4,CARD11
GO: Biological Process	GO:0002429	immune response-activating cell surface receptor signaling pathway		0.000531	15	58	FCER1G,ADA,MALT1,PLEKHA1,FYN,LAX1,CBLB,CD247,SKAP1,ZAP70,MAPK1,UBASH3A,SPG21,PLCG1,LCK
GO: Biological Process	GO:0032943	mononuclear cell proliferation		0.000611	25	150	TNFSF14,TNFRSF14,ADA,MALT1,FKBP1A,FYN,RPS6,DNAJA3,TLR4,BCL2,BCL6,CBLB,CD40LG,CD27,CD5,CD81,ZAP70,PRKCQ,PRKCD,IL7R,ITGAM,IMPDH1,CD24,CXCR4,CARD11
GO: Biological Process	GO:0002764	immune response-regulating signal transduction		0.000843	18	85	FCER1G,ADA,MALT1,PLEKHA1,FYN,TLR5,TLR4,LAX1,CBLB,CD247,SKAP1,ZAP70,MAPK1,UBASH3A,SPG21,PLCG1,CD24,LCK
GO: Biological Process	GO:0016192	vesicle-mediated transport		0.000878	70	726	FCER1G,LIN7A,TMED2,AP3M2,FCGR2A,SIRPA,STX2,LDLRAP1,CPNE3,BIN1,ANXA3,SORT1,APP,ARF3,CCL5,ARF4,ARRB2,MFGE8,RAB31,EXOC6,VAV3,AZU1,SEC23B,SFT2D1,CLTCL1,RTN3,BLOC1S1,SYTL2,STX3,NEDD4,ARFGEF1,STX10,STX11,WIPI1,GSN,ATL3,LRBA,STXBP5,CD63,CNO,CEBPE,GAB2,RABGEF1,PRKCA,PRKAA1,AP3S1,TOM1,SCAMP3,VPS35,OPTN,PLCG1,NCALD,COPB2,RALB,VAMP3,PRAM1,DBNL,SCRIB,LRP3,LRPAP1,PTEN,OSBPL1A,CD24,RAB3D,LLGL1,RAB27A,ELMOD2,RA…
GO: Biological Process	GO:0030098	lymphocyte differentiation		0.000893	27	174	ADA,MALT1,RPS6,FLT3LG,ATM,WWP1,DNAJA3,BCL2,BCL3,BCL6,TCF3,CD40LG,CD27,CD8A,CD2,CD3D,BCL11B,GIMAP5,ZAP70,HLX,IL7R,RBPJ,PIK3R1,IL11RA,CD24,LCK,CARD11
GO: Cellular Component	GO:0031982	vesicle		0.000549	72	797	TMED2,DNAJC5,AP3M2,YIPF1,RGL4,STX2,LDLRAP1,HERC3,GGH,ALDOA,APH1B,GIPC1,BIN1,ANXA3,SORT1,APP,ARRB2,ATP1A1,ATM,ATP6V0D1,AZU1,THBS4,DYSF,SEC23B,ATP8A1,CLTCL1,AGTRAP,DPP7,FSTL3,SYTL2,TFF3,RGS19,CANX,STX3,CAMK2G,UQCC,SYPL1,NEU1,ZDHHC8,WIPI1,LRBA,STXBP5,HSP90AB1,MAP1LC3A,SRGN,RAB21,AP3S1,VEGFB,IL1RN,SPG21,OPTN,CTSD,PLD1,FLOT1,ASPSCR1,SERPINA1,ICA1,NCALD,COPB2,VAMP3,AKAP7,KIF1B,LRPAP1,LTF,RAB3D,CXCR4,ST…
GO: Cellular Component	GO:0016023	cytoplasmic membrane-bounded vesicle		0.000891	65	704	TMED2,DNAJC5,YIPF1,RGL4,STX2,LDLRAP1,HERC3,GGH,ALDOA,APH1B,GIPC1,BIN1,ANXA3,SORT1,APP,ARRB2,ATP1A1,ATM,ATP6V0D1,AZU1,THBS4,DYSF,SEC23B,ATP8A1,CLTCL1,AGTRAP,DPP7,FSTL3,SYTL2,TFF3,RGS19,CANX,STX3,CAMK2G,UQCC,SYPL1,NEU1,ZDHHC8,WIPI1,LRBA,STXBP5,HSP90AB1,SRGN,RAB21,AP3S1,VEGFB,SPG21,OPTN,CTSD,FLOT1,SERPINA1,ICA1,NCALD,COPB2,AKAP7,KIF1B,LTF,RAB3D,CXCR4,STOM,RAB27A,RAB5C,LCK,LAMP2,CLINT1
HUMAN PHENOTYPES AND DISEASES
Human Phenotype	HP:0001871	Hematological abnormality		0.006317	43	469	DPM1,PUS1,FES,ADA,AK1,F12,ALDOA,PSTPIP1,G6PD,PADI4,EGLN1,ATM,GLA,SEC23B,BCL2,TPI1,BCL3,GBA,ICOS,TAZ,CD40LG,NEU1,CD8A,CD247,STAT3,CEBPE,PRPS1,PGK1,PGD,CDAN1,DIRC2,RFX5,JAK2,NUP214,OSTM1,IL12RB1,SH2D1A,KIF1B,PTEN,CXCR4,LBR,RAB27A,ELMOD2
Human Phenotype	HP:0002715	Immunological abnormality		0.025544	29	273	ADA,IL21R,PSTPIP1,G6PD,PADI4,ATM,ANTXR2,GBA,ICOS,TAZ,CD40LG,NEU1,CD8A,CD247,CD3G,STAT3,CEBPE,CTSC,ZAP70,PRPS1,CFP,RFX5,ITPR3,OSTM1,SH2D1A,PRTN3,CXCR4,RAB27A,ELMOD2
MOLECULAR AND CELLULAR PATHWAYS
Pathway	hsa04660	T cell receptor signaling pathway	KEGG pathway	3.3e-05	25	109	SOS2,MALT1,FYN,VAV3,ICOS,CBLB,CD40LG,CD8A,CD247,CD3G,CD3D,GSK3B,ZAP70,MAP2K1,PRKCQ,MAPK1,PPP3CC,PLCG1,RASGRP1,MAPK14,PIK3R1,ITK,LCK,CARD11,LAT
Pathway	71387	Metabolism of sugars	Reactome	5.5e-05	19	68	ALDOA,G6PD,TPI1,GAPDH,GBE1,GYG1,HK3,PGK1,PGD,PGAM1,PFKP,PFKFB2,UGP2,PFKFB3,PFKFB4,RPE,LDHB,LDHA,PYGL
Pathway	tcr_pathway	TCR signaling in naïve CD4+ T cells	NCI-Nature Curated	8.5e-05	18	63	MALT1,MAP4K1,FYN,CD247,CD3G,CD3D,GAB2,ZAP70,PRKCQ,PRKCA,PLCG1,RASGRP1,RAP1A,ITK,DBNL,PTEN,LCK,CARD11
Pathway	cd8tcrpathway	TCR signaling in naïve CD8+ T cells	NCI-Nature Curated	0.000938	15	52	MALT1,FYN,CD8A,CD247,CD3G,CD3D,ZAP70,PRKCQ,PRKCA,PLCG1,RASGRP1,RAP1A,LCK,CARD11,LAT

## Sheet: PC4 MN TOP1000
TOPPFUN OUTPUT FOR TOP 1000 SIGNIFICANT TRANSCRIPTS FOR PC4 in MN study
				P-value	Hits in List	Count in DB	Targets
TRANSCRIPTION FACTOR BINDING SITES
TFBS	RYTTCCTG_V$ETS2_B	RYTTCCTG_V$ETS2_B		0.010773	82	869	FCER1G,FERMT3,SLPI,KLHL3,FGR,CRADD,ADAM15,SOS2,PLEKHA1,ETS1,FBXL5,BIN1,PSTPIP1,MAP4K1,ARF4,ARRB2,FLT3LG,MID1,MLLT6,MMP9,TGM3,GK,QPCT,BCL3,BCL6,BMX,CA4,CANX,TGIF2,YARS,GRAP,RUNX3,NCF4,PPP1R16B,CBLB,NEDD4,FKBP9L,SPTAN1,CD6,CD5,STX11,ATL3,SS18,EVL,CEBPE,GAB2,CITED4,PRKCH,PGM1,IL1RN,IL7R,SSBP4,RBPJ,AIG1,PLCG1,GPR97,CD96,MAPK14,PIK3R1,ZNF410,CSF3R,NCALD,ARHGAP15,RALGDS,RALB,ITPR3,KLF12,DNMT1,IL11RA,TR…
MICRO RNA BINDING SITES
None
DRUGS
Drug	CID000000718	fructose 1,6-bisphosphate	Stitch	0	37	151	ALDOA,AMPD3,ME2,G6PD,APRT,MGAM,GK,PGAM4,TPI1,GAPDH,MAEA,GBA,GBE1,PGM2,HP,PRPS1,HK3,PGK1,PGD,PGAM1,PGM1,PFKP,PFKFB2,UGP2,PFKFB3,PFKFB4,TXN,PECR,TM9SF2,RPE,EXOSC8,INPP1,IMPA2,LRG1,LDHB,LDHA,PYGL
Drug	D002995	Clofibric Acid	CTD	0.001306	72	666	SLC27A2,NOL6,ACOX1,PUS1,ZMIZ2,PARP1,ADSS,ETS2,CDC16,ZMYND11,ALDOA,APH1B,ST6GAL1,WDR6,APP,SDHA,CLYBL,APRT,TYSND1,RPS6,POLR3A,RPS3A,DDX56,ATP1A1,ATIC,DCAKD,RPS27,RPS15A,RPS18,HSD17B11,NOL8,INSIG2,CEACAM1,PRDX5,LANCL1,AGTRAP,BPHL,TFF3,RGS19,NCL,NDUFB3,NDUFS3,AGPAT2,PPAP2B,PDCD4,PRMT1,UBL3,MAP1LC3A,CTSC,PGAM1,PGM1,UGP2,THOC1,TC2N,SPG21,OPTN,TRAP1,NSUN5,PLAU,DDX39,POLR1E,MFHAS1,RPL13,RPL5,IMP4,MRPS18B…
GENE ONTOLOGY CATEGORIES
GO: Biological Process	GO:0001775	cell activation		0	68	471	FCER1G,FERMT3,TOLLIP,FCGR2A,TNFSF14,ADAM9,TNFRSF14,ADA,IL21R,MALT1,FKBP1A,SKAP2,ANXA3,FYN,RPS6,FLT3LG,ATM,WWP1,DNAJA3,AZU1,TLR5,TLR4,BCL2,BCL3,BCL6,TCF3,LAX1,BPI,CBLB,CD40LG,ENTPD1,CD27,CD7,CD8A,CD5,CD3G,CD2,CD3D,BCL11B,CD81,EVL,GIMAP5,GAB2,ZAP70,HLX,PRKCQ,PRKCD,IL7R,RBPJ,PLSCR1,PIK3R1,JAK2,PRAM1,ITGAM,IMPDH1,IL18,IL11RA,TREML2,SMAD3,LTB,LTA,CD24,CXCR4,RAB27A,LCK,CARD11,PTPRE,LAT
GO: Biological Process	GO:0045321	leukocyte activation		0	61	421	FCER1G,TOLLIP,FCGR2A,TNFSF14,ADAM9,TNFRSF14,ADA,IL21R,MALT1,FKBP1A,SKAP2,ANXA3,FYN,RPS6,FLT3LG,ATM,WWP1,DNAJA3,AZU1,TLR5,TLR4,BCL2,BCL3,BCL6,TCF3,LAX1,BPI,CBLB,CD40LG,CD27,CD7,CD8A,CD5,CD3G,CD2,CD3D,BCL11B,CD81,GIMAP5,GAB2,ZAP70,HLX,PRKCQ,PRKCD,IL7R,RBPJ,PIK3R1,PRAM1,ITGAM,IMPDH1,IL18,IL11RA,TREML2,SMAD3,CD24,CXCR4,RAB27A,LCK,CARD11,PTPRE,LAT
GO: Biological Process	GO:0002376	immune system process		0	122	1258	FCAR,FCER1G,TOLLIP,FCGR2A,TNFSF14,PRDX3,ADAM9,TNFRSF14,ADA,IL21R,MALT1,FKBP1A,PLEKHA1,SKAP2,ADSS,JAG1,ETS1,F12,ST6GAL1,ANXA3,CLEC4D,CLEC5A,PGLYRP1,G6PD,FYN,CCL5,RPS6,ARRB2,FAIM3,FLT3LG,POLR3A,ATM,WWP1,MMP9,RPS14,DNAJA3,CKLF,AZU1,THBS4,TLR5,TLR4,LIME1,TNFRSF1A,BCL2,BCL3,OLR1,BCL6,BST1,ORM1,ORM2,TCF3,LAX1,BPI,MAEA,FSTL3,ICOS,NCF4,CBLB,TAZ,CD40LG,CD27,CD7,CD8A,CD5,CD247,CD3G,CD2,CD3D,BCL11B,SKAP1,CD…
GO: Biological Process	GO:0006917	induction of apoptosis		0	53	379	ARHGEF3,FADD,TNFRSF10B,FCGR2A,TNFSF14,CRADD,SOS2,TNFRSF25,NAE1,APH1B,APAF1,MAL,SORT1,APP,DAPK2,ARRB2,RPS3A,ATM,VAV3,SH3GLB1,BCL3,DYRK2,MYC,RUNX3,CUL4A,NDUFS3,CD27,CD5,CD2,GSK3B,NME3,GIMAP5,PLEKHF1,ARHGEF11,MAPK1,PRKCD,PRKCA,IL7R,PDCD7,EAF2,ARHGEF18,JAK2,IL18,SH2D1A,MAGED1,SMAD3,PTEN,LTB,LTA,CD24,TP53I3,RAB27A,LCK
GO: Biological Process	GO:0012502	induction of programmed cell death		0	53	380	ARHGEF3,FADD,TNFRSF10B,FCGR2A,TNFSF14,CRADD,SOS2,TNFRSF25,NAE1,APH1B,APAF1,MAL,SORT1,APP,DAPK2,ARRB2,RPS3A,ATM,VAV3,SH3GLB1,BCL3,DYRK2,MYC,RUNX3,CUL4A,NDUFS3,CD27,CD5,CD2,GSK3B,NME3,GIMAP5,PLEKHF1,ARHGEF11,MAPK1,PRKCD,PRKCA,IL7R,PDCD7,EAF2,ARHGEF18,JAK2,IL18,SH2D1A,MAGED1,SMAD3,PTEN,LTB,LTA,CD24,TP53I3,RAB27A,LCK
GO: Biological Process	GO:0046649	lymphocyte activation		0	50	349	TNFSF14,TNFRSF14,ADA,IL21R,MALT1,FKBP1A,SKAP2,FYN,RPS6,FLT3LG,ATM,WWP1,DNAJA3,TLR4,BCL2,BCL3,BCL6,TCF3,LAX1,CBLB,CD40LG,CD27,CD7,CD8A,CD5,CD3G,CD2,CD3D,BCL11B,CD81,GIMAP5,ZAP70,HLX,PRKCQ,PRKCD,IL7R,RBPJ,PIK3R1,ITGAM,IMPDH1,IL18,IL11RA,TREML2,SMAD3,CD24,CXCR4,RAB27A,LCK,CARD11,LAT
GO: Biological Process	GO:0043067	regulation of programmed cell death		1e-06	99	1006	ARHGEF3,FCER1G,AARS,FADD,DNAJC5,TNFRSF10B,FCGR2A,TNFSF14,CRADD,PRDX3,SOS2,ADAM9,ADA,TNFRSF25,MALT1,IER3,ETS1,NAE1,APH1B,APAF1,MAL,SORT1,APP,DAPK2,G6PD,RPS6,ARRB2,FAIM3,RPS3A,ATM,GSPT2,MMP9,DNAJA3,VAV3,AZU1,TLR4,GNAQ,PRDX5,SH3GLB1,BCL2,BCL3,BCL6,DYRK2,NLRP12,BNIP2,MAEA,TGFA,MYC,RUNX3,CUL4A,NDUFS3,CD40LG,CD27,CD5,CD3G,CD2,BCL11B,STAMBP,GSK3B,ATG7,NME3,NLRC4,GIMAP5,PLEKHF1,HSPB1,ARHGEF11,MAPK1,PRKCD…
GO: Biological Process	GO:0043065	positive regulation of apoptosis		1e-06	62	517	ARHGEF3,FADD,TNFRSF10B,FCGR2A,TNFSF14,CRADD,SOS2,TNFRSF25,NAE1,APH1B,APAF1,MAL,SORT1,APP,DAPK2,RPS6,ARRB2,RPS3A,ATM,MMP9,VAV3,TLR4,SH3GLB1,BCL2,BCL3,BCL6,DYRK2,MYC,RUNX3,CUL4A,NDUFS3,CD27,CD5,CD2,GSK3B,NME3,NLRC4,GIMAP5,PLEKHF1,ARHGEF11,MAPK1,PRKCD,PRKCA,PPP3CC,IL7R,PDCD7,EAF2,ARHGEF18,JAK2,SCRIB,IL18,SH2D1A,MAGED1,SMAD3,PTEN,LTB,LTA,CD24,TP53I3,LDHA,RAB27A,LCK
GO: Biological Process	GO:0010941	regulation of cell death		1e-06	99	1017	ARHGEF3,FCER1G,AARS,FADD,DNAJC5,TNFRSF10B,FCGR2A,TNFSF14,CRADD,PRDX3,SOS2,ADAM9,ADA,TNFRSF25,MALT1,IER3,ETS1,NAE1,APH1B,APAF1,MAL,SORT1,APP,DAPK2,G6PD,RPS6,ARRB2,FAIM3,RPS3A,ATM,GSPT2,MMP9,DNAJA3,VAV3,AZU1,TLR4,GNAQ,PRDX5,SH3GLB1,BCL2,BCL3,BCL6,DYRK2,NLRP12,BNIP2,MAEA,TGFA,MYC,RUNX3,CUL4A,NDUFS3,CD40LG,CD27,CD5,CD3G,CD2,BCL11B,STAMBP,GSK3B,ATG7,NME3,NLRC4,GIMAP5,PLEKHF1,HSPB1,ARHGEF11,MAPK1,PRKCD…
GO: Biological Process	GO:0043068	positive regulation of programmed cell death		2e-06	62	520	ARHGEF3,FADD,TNFRSF10B,FCGR2A,TNFSF14,CRADD,SOS2,TNFRSF25,NAE1,APH1B,APAF1,MAL,SORT1,APP,DAPK2,RPS6,ARRB2,RPS3A,ATM,MMP9,VAV3,TLR4,SH3GLB1,BCL2,BCL3,BCL6,DYRK2,MYC,RUNX3,CUL4A,NDUFS3,CD27,CD5,CD2,GSK3B,NME3,NLRC4,GIMAP5,PLEKHF1,ARHGEF11,MAPK1,PRKCD,PRKCA,PPP3CC,IL7R,PDCD7,EAF2,ARHGEF18,JAK2,SCRIB,IL18,SH2D1A,MAGED1,SMAD3,PTEN,LTB,LTA,CD24,TP53I3,LDHA,RAB27A,LCK
GO: Biological Process	GO:0042981	regulation of apoptosis		2e-06	97	994	ARHGEF3,FCER1G,AARS,FADD,DNAJC5,TNFRSF10B,FCGR2A,TNFSF14,CRADD,PRDX3,SOS2,ADAM9,ADA,TNFRSF25,MALT1,IER3,ETS1,NAE1,APH1B,APAF1,MAL,SORT1,APP,DAPK2,G6PD,RPS6,ARRB2,FAIM3,RPS3A,ATM,GSPT2,MMP9,DNAJA3,VAV3,AZU1,TLR4,GNAQ,PRDX5,SH3GLB1,BCL2,BCL3,BCL6,DYRK2,NLRP12,BNIP2,MAEA,TGFA,MYC,RUNX3,CUL4A,NDUFS3,CD40LG,CD27,CD5,CD3G,CD2,BCL11B,STAMBP,GSK3B,ATG7,NME3,NLRC4,GIMAP5,PLEKHF1,HSPB1,ARHGEF11,MAPK1,PRKCD…
GO: Biological Process	GO:0010942	positive regulation of cell death		3e-06	62	527	ARHGEF3,FADD,TNFRSF10B,FCGR2A,TNFSF14,CRADD,SOS2,TNFRSF25,NAE1,APH1B,APAF1,MAL,SORT1,APP,DAPK2,RPS6,ARRB2,RPS3A,ATM,MMP9,VAV3,TLR4,SH3GLB1,BCL2,BCL3,BCL6,DYRK2,MYC,RUNX3,CUL4A,NDUFS3,CD27,CD5,CD2,GSK3B,NME3,NLRC4,GIMAP5,PLEKHF1,ARHGEF11,MAPK1,PRKCD,PRKCA,PPP3CC,IL7R,PDCD7,EAF2,ARHGEF18,JAK2,SCRIB,IL18,SH2D1A,MAGED1,SMAD3,PTEN,LTB,LTA,CD24,TP53I3,LDHA,RAB27A,LCK
GO: Biological Process	GO:0042110	T cell activation		5e-06	37	237	TNFSF14,TNFRSF14,ADA,MALT1,FKBP1A,FYN,RPS6,WWP1,DNAJA3,BCL2,BCL3,BCL6,LAX1,CBLB,CD27,CD7,CD8A,CD5,CD3G,CD2,CD3D,BCL11B,GIMAP5,ZAP70,HLX,PRKCQ,IL7R,ITGAM,IL18,TREML2,SMAD3,CD24,CXCR4,RAB27A,LCK,CARD11,LAT
GO: Biological Process	GO:0012501	programmed cell death		1.1e-05	114	1279	ARHGEF3,FCER1G,AARS,FADD,DNAJC5,TNFRSF10B,FCGR2A,TNFSF14,CRADD,PRDX3,SOS2,ADAM9,TNFRSF14,ADA,TNFRSF25,MALT1,C11orf82,IER3,ETS1,NAE1,APH1B,APAF1,MAL,SORT1,APP,DAPK2,PGLYRP1,G6PD,RPS6,ARRB2,FAIM3,RPS3A,ATM,GSPT2,MMP9,DNAJA3,VAV3,AZU1,TLR4,DUSP22,TNFRSF1A,GNAQ,PRDX5,SH3GLB1,BCL2,BCL3,BCL6,RTN3,DYRK2,NLRP12,BNIP2,MAEA,TSPO,TGFA,MYC,YARS,RHOT1,RUNX3,CUL4A,NDUFS3,CD40LG,CD27,CD5,CD3G,CD2,BCL11B,STAMBP,…
GO: Biological Process	GO:0006915	apoptosis		1.2e-05	113	1265	ARHGEF3,FCER1G,AARS,FADD,DNAJC5,TNFRSF10B,FCGR2A,TNFSF14,CRADD,PRDX3,SOS2,ADAM9,TNFRSF14,ADA,TNFRSF25,MALT1,C11orf82,IER3,ETS1,NAE1,APH1B,APAF1,MAL,SORT1,APP,DAPK2,PGLYRP1,G6PD,RPS6,ARRB2,FAIM3,RPS3A,ATM,GSPT2,MMP9,DNAJA3,VAV3,AZU1,TLR4,DUSP22,TNFRSF1A,GNAQ,PRDX5,SH3GLB1,BCL2,BCL3,BCL6,RTN3,DYRK2,NLRP12,BNIP2,MAEA,TSPO,TGFA,MYC,YARS,RHOT1,RUNX3,CUL4A,NDUFS3,CD40LG,CD27,CD5,CD3G,CD2,BCL11B,STAMBP,…
GO: Biological Process	GO:0008219	cell death		2.2e-05	120	1385	ARHGEF3,FCER1G,AARS,FADD,DNAJC5,TNFRSF10B,FCGR2A,TNFSF14,CRADD,PRDX3,SOS2,ADAM9,TNFRSF14,ADA,TNFRSF25,MALT1,C11orf82,IER3,ETS1,NAE1,APH1B,APAF1,MAL,SORT1,APP,DAPK2,PGLYRP1,G6PD,RPS6,ARRB2,FAIM3,RPS3A,ATM,GSPT2,MMP9,DNAJA3,VAV3,AZU1,TLR4,DUSP22,AXIN2,TNFRSF1A,GNAQ,PRDX5,SH3GLB1,BCL2,BCL3,OLR1,BCL6,RTN3,DYRK2,NLRP12,BNIP2,MAEA,TSPO,TGFA,MYC,GZMM,YARS,RHOT1,RUNX3,CUL4A,NDUFS3,CD40LG,CD27,CD5,CD3G,CD…
GO: Biological Process	GO:0016265	death		2.7e-05	120	1390	ARHGEF3,FCER1G,AARS,FADD,DNAJC5,TNFRSF10B,FCGR2A,TNFSF14,CRADD,PRDX3,SOS2,ADAM9,TNFRSF14,ADA,TNFRSF25,MALT1,C11orf82,IER3,ETS1,NAE1,APH1B,APAF1,MAL,SORT1,APP,DAPK2,PGLYRP1,G6PD,RPS6,ARRB2,FAIM3,RPS3A,ATM,GSPT2,MMP9,DNAJA3,VAV3,AZU1,TLR4,DUSP22,AXIN2,TNFRSF1A,GNAQ,PRDX5,SH3GLB1,BCL2,BCL3,OLR1,BCL6,RTN3,DYRK2,NLRP12,BNIP2,MAEA,TSPO,TGFA,MYC,GZMM,YARS,RHOT1,RUNX3,CUL4A,NDUFS3,CD40LG,CD27,CD5,CD3G,CD…
GO: Biological Process	GO:0046651	lymphocyte proliferation		0.000115	26	148	TNFSF14,TNFRSF14,ADA,MALT1,FKBP1A,FYN,RPS6,DNAJA3,TLR4,BCL2,BCL6,CBLB,CD40LG,CD27,CD5,CD81,ZAP70,PRKCQ,PRKCD,IL7R,ITGAM,IMPDH1,IL18,CD24,CXCR4,CARD11
GO: Biological Process	GO:0006955	immune response		0.00013	80	832	FCAR,FCER1G,TOLLIP,FCGR2A,TNFSF14,TNFRSF14,ADA,MALT1,FKBP1A,PLEKHA1,ETS1,F12,ST6GAL1,ANXA3,CLEC4D,CLEC5A,PGLYRP1,FYN,CCL5,RPS6,ARRB2,FAIM3,POLR3A,TLR5,TLR4,LIME1,TNFRSF1A,BCL2,BCL3,OLR1,BCL6,BST1,TCF3,LAX1,BPI,ICOS,NCF4,CBLB,CD40LG,CD27,CD7,CD8A,CD247,SKAP1,CEACAM8,GIMAP5,GAB2,CTSC,ZAP70,HLX,LTB4R,MAPK1,PRKCD,UBASH3A,IL1RN,CFP,IL7R,SPG21,TLR8,PLSCR1,PLCG1,CD96,IL32,NLRX1,PRAM1,DBNL,IL18,SH2D1A,SM…
GO: Biological Process	GO:0032943	mononuclear cell proliferation		0.000152	26	150	TNFSF14,TNFRSF14,ADA,MALT1,FKBP1A,FYN,RPS6,DNAJA3,TLR4,BCL2,BCL6,CBLB,CD40LG,CD27,CD5,CD81,ZAP70,PRKCQ,PRKCD,IL7R,ITGAM,IMPDH1,IL18,CD24,CXCR4,CARD11
GO: Biological Process	GO:0002682	regulation of immune system process		0.000167	55	493	FCER1G,FCGR2A,TNFSF14,TNFRSF14,ADA,MALT1,FKBP1A,PLEKHA1,JAG1,ETS1,FYN,CCL5,ARRB2,DNAJA3,THBS4,TLR5,TLR4,BCL6,ORM1,ORM2,LAX1,BPI,FSTL3,CBLB,CD40LG,CD27,CD5,CD247,CD2,SKAP1,CD81,GIMAP5,GAB2,ZAP70,HLX,PRKCQ,MAPK1,UBASH3A,CFP,IL7R,SPG21,TLR8,PLCG1,MAPK14,PIK3R1,PRAM1,IL18,SH2D1A,SMAD3,LTA,CD24,LCK,CARD11,PTPRE,LAT
GO: Biological Process	GO:0002768	immune response-regulating cell surface receptor signaling pathway		0.000269	16	63	FCER1G,ADA,MALT1,PLEKHA1,FYN,LAX1,CBLB,CD247,SKAP1,ZAP70,MAPK1,UBASH3A,SPG21,PLCG1,CD24,LCK
GO: Biological Process	GO:0019318	hexose metabolic process		0.000326	33	231	DPM1,ALDOA,FUT4,G6PD,PGAM4,TPI1,GAPDH,ACN9,GBE1,MYC,GYG1,PGM2,GSK3B,HK3,PRKAA1,PPP1R3D,PGK1,PGD,PGAM1,PGM1,PFKP,PFKFB2,UGP2,PFKFB3,PFKFB4,PDK3,MAPK14,PIK3R1,RPE,ALDH5A1,LDHB,LDHA,PYGL
GO: Biological Process	GO:0006006	glucose metabolic process		0.000326	29	187	ALDOA,G6PD,PGAM4,TPI1,GAPDH,ACN9,GBE1,MYC,GYG1,PGM2,GSK3B,HK3,PRKAA1,PPP1R3D,PGK1,PGD,PGAM1,PGM1,PFKP,PFKFB2,UGP2,PDK3,MAPK14,PIK3R1,RPE,ALDH5A1,LDHB,LDHA,PYGL
GO: Biological Process	GO:0050851	antigen receptor-mediated signaling pathway		0.000353	14	49	ADA,MALT1,PLEKHA1,FYN,LAX1,CBLB,CD247,SKAP1,ZAP70,MAPK1,UBASH3A,SPG21,PLCG1,LCK
GO: Biological Process	GO:0002684	positive regulation of immune system process		0.000398	39	303	FCER1G,FCGR2A,TNFSF14,ADA,MALT1,PLEKHA1,FYN,DNAJA3,THBS4,TLR5,TLR4,BCL6,LAX1,CBLB,CD40LG,CD27,CD5,CD247,CD2,SKAP1,CD81,GIMAP5,GAB2,ZAP70,HLX,PRKCQ,MAPK1,UBASH3A,CFP,IL7R,SPG21,TLR8,PLCG1,IL18,SH2D1A,LTA,CD24,LCK,CARD11
GO: Biological Process	GO:0002429	immune response-activating cell surface receptor signaling pathway		0.00053	15	58	FCER1G,ADA,MALT1,PLEKHA1,FYN,LAX1,CBLB,CD247,SKAP1,ZAP70,MAPK1,UBASH3A,SPG21,PLCG1,LCK
GO: Biological Process	GO:0005996	monosaccharide metabolic process		0.000696	34	250	DPM1,ALDOA,FUT4,G6PD,PGAM4,TPI1,GAPDH,ACN9,GBE1,MYC,GYG1,PGM2,GSK3B,PRPS1,HK3,PRKAA1,PPP1R3D,PGK1,PGD,PGAM1,PGM1,PFKP,PFKFB2,UGP2,PFKFB3,PFKFB4,PDK3,MAPK14,PIK3R1,RPE,ALDH5A1,LDHB,LDHA,PYGL
GO: Biological Process	GO:0002764	immune response-regulating signal transduction		0.00084	18	85	FCER1G,ADA,MALT1,PLEKHA1,FYN,TLR5,TLR4,LAX1,CBLB,CD247,SKAP1,ZAP70,MAPK1,UBASH3A,SPG21,PLCG1,CD24,LCK
GO: Biological Process	GO:0016192	vesicle-mediated transport		0.000871	70	726	FCER1G,LIN7A,TMED2,AP3M2,FCGR2A,SIRPA,STX2,LDLRAP1,CPNE3,BIN1,ANXA3,SORT1,APP,ARF3,CCL5,ARF4,ARRB2,MFGE8,RAB31,EXOC6,VAV3,AZU1,SEC23B,SFT2D1,CLTCL1,RTN3,BLOC1S1,SYTL2,STX3,NEDD4,ARFGEF1,STX10,STX11,WIPI1,GSN,ATL3,LRBA,STXBP5,CD63,CNO,CEBPE,GAB2,RABGEF1,PRKCA,PRKAA1,AP3S1,TOM1,SCAMP3,VPS35,OPTN,PLCG1,NCALD,COPB2,RALB,VAMP3,PRAM1,DBNL,SCRIB,LRP3,LRPAP1,PTEN,OSBPL1A,CD24,RAB3D,LLGL1,RAB27A,ELMOD2,RA…
GO: Biological Process	GO:0030098	lymphocyte differentiation		0.00089	27	174	ADA,MALT1,RPS6,FLT3LG,ATM,WWP1,DNAJA3,BCL2,BCL3,BCL6,TCF3,CD40LG,CD27,CD8A,CD2,CD3D,BCL11B,GIMAP5,ZAP70,HLX,IL7R,RBPJ,PIK3R1,IL11RA,CD24,LCK,CARD11
GO: Cellular Component	GO:0031982	vesicle		0.000545	72	797	TMED2,DNAJC5,AP3M2,YIPF1,RGL4,STX2,LDLRAP1,HERC3,GGH,ALDOA,APH1B,GIPC1,BIN1,ANXA3,SORT1,APP,ARRB2,ATP1A1,ATM,ATP6V0D1,AZU1,THBS4,DYSF,SEC23B,ATP8A1,CLTCL1,AGTRAP,DPP7,FSTL3,SYTL2,TFF3,RGS19,CANX,STX3,CAMK2G,UQCC,SYPL1,NEU1,ZDHHC8,WIPI1,LRBA,STXBP5,HSP90AB1,MAP1LC3A,SRGN,RAB21,AP3S1,VEGFB,IL1RN,SPG21,OPTN,CTSD,PLD1,FLOT1,ASPSCR1,SERPINA1,ICA1,NCALD,COPB2,VAMP3,AKAP7,KIF1B,LRPAP1,LTF,RAB3D,CXCR4,ST…
GO: Cellular Component	GO:0016023	cytoplasmic membrane-bounded vesicle		0.000885	65	704	TMED2,DNAJC5,YIPF1,RGL4,STX2,LDLRAP1,HERC3,GGH,ALDOA,APH1B,GIPC1,BIN1,ANXA3,SORT1,APP,ARRB2,ATP1A1,ATM,ATP6V0D1,AZU1,THBS4,DYSF,SEC23B,ATP8A1,CLTCL1,AGTRAP,DPP7,FSTL3,SYTL2,TFF3,RGS19,CANX,STX3,CAMK2G,UQCC,SYPL1,NEU1,ZDHHC8,WIPI1,LRBA,STXBP5,HSP90AB1,SRGN,RAB21,AP3S1,VEGFB,SPG21,OPTN,CTSD,FLOT1,SERPINA1,ICA1,NCALD,COPB2,AKAP7,KIF1B,LTF,RAB3D,CXCR4,STOM,RAB27A,RAB5C,LCK,LAMP2,CLINT1
HUMAN PHENOTYPES AND DISEASES
Human Phenotype	HP:0001871	Hematological abnormality		0.006317	43	469	DPM1,PUS1,FES,ADA,AK1,F12,ALDOA,PSTPIP1,G6PD,PADI4,EGLN1,ATM,GLA,SEC23B,BCL2,TPI1,BCL3,GBA,ICOS,TAZ,CD40LG,NEU1,CD8A,CD247,STAT3,CEBPE,PRPS1,PGK1,PGD,CDAN1,DIRC2,RFX5,JAK2,NUP214,OSTM1,IL12RB1,SH2D1A,KIF1B,PTEN,CXCR4,LBR,RAB27A,ELMOD2
Human Phenotype	HP:0002715	Immunological abnormality		0.025544	29	273	ADA,IL21R,PSTPIP1,G6PD,PADI4,ATM,ANTXR2,GBA,ICOS,TAZ,CD40LG,NEU1,CD8A,CD247,CD3G,STAT3,CEBPE,CTSC,ZAP70,PRPS1,CFP,RFX5,ITPR3,OSTM1,SH2D1A,PRTN3,CXCR4,RAB27A,ELMOD2
MOLECULAR AND CELLULAR PATHWAYS
Pathway	71387	Metabolism of sugars	Reactome	9e-06	20	68	ALDOA,G6PD,TPI1,GAPDH,GBE1,GYG1,HK3,PGK1,PGD,PGAM1,PGM1,PFKP,PFKFB2,UGP2,PFKFB3,PFKFB4,RPE,LDHB,LDHA,PYGL
Pathway	hsa04660	T cell receptor signaling pathway	KEGG pathway	3.4e-05	25	109	SOS2,MALT1,FYN,VAV3,ICOS,CBLB,CD40LG,CD8A,CD247,CD3G,CD3D,GSK3B,ZAP70,MAP2K1,PRKCQ,MAPK1,PPP3CC,PLCG1,RASGRP1,MAPK14,PIK3R1,ITK,LCK,CARD11,LAT
Pathway	tcr_pathway	TCR signaling in naïve CD4+ T cells	NCI-Nature Curated	8.8e-05	18	63	MALT1,MAP4K1,FYN,CD247,CD3G,CD3D,GAB2,ZAP70,PRKCQ,PRKCA,PLCG1,RASGRP1,RAP1A,ITK,DBNL,PTEN,LCK,CARD11
Pathway	cd8tcrpathway	TCR signaling in naïve CD8+ T cells	NCI-Nature Curated	0.000965	15	52	MALT1,FYN,CD8A,CD247,CD3G,CD3D,ZAP70,PRKCQ,PRKCA,PLCG1,RASGRP1,RAP1A,LCK,CARD11,LAT

## Sheet: PC5 MN NLP5
TOPPFUN OUTPUT FOR ALL TRANSCRIPTS AT NLP>5 (P<0.00001) FOR PC5 in MN study
				P-value	Hits in List	Count in DB	Targets
TRANSCRIPTION FACTOR BINDING SITES
None
MICRO RNA BINDING SITES
None
DRUGS
None
GENE ONTOLOGY CATEGORIES
GO: Molecular Function	GO:0016791	phosphatase activity		1.9e-05	19	267	PPM1B,PPEF1,ACP1,SACM1L,PTPLB,PPM1K,RDH14,CTDSP1,SYNJ1,PTPN22,NT5C2,PPP3CA,ALPP,PGAM5,ATP1A1,PTPN2,PTPRA,MTMR12,MTMR6
GO: Molecular Function	GO:0042578	phosphoric ester hydrolase activity		7.5e-05	21	352	PPM1B,PPEF1,ACP1,SACM1L,PTPLB,PPM1K,RDH14,CTDSP1,SYNJ1,PTPN22,NT5C2,PPP3CA,ALPP,APEX1,PGAM5,ATP1A1,PTPN2,PTPRA,MTMR12,MTMR6,TDP1
HUMAN PHENOTYPES AND DISEASES
Human Phenotype	HP:0001008	Accumulation of melanosomes in melanocytes		0.001136	3	3	LYST,MYO5A,RAB27A
MOLECULAR AND CELLULAR PATHWAYS
None

## Sheet: PC5 MN TOP1000
TOPPFUN OUTPUT FOR TOP 1000 SIGNIFICANT TRANSCRIPTS FOR PC5 in MN study
				P-value	Hits in List	Count in DB	Targets
TRANSCRIPTION FACTOR BINDING SITES
TFBS	RCGCANGCGY_V$NRF1_Q6	RCGCANGCGY_V$NRF1_Q6		0.000705	68	654	SNRPN,RALBP1,SNAPC1,SNURF,RNF24,BCCIP,TRIM39,MTPN,SDHA,RHOA,RQCD1,RSU1,KCTD13,MAP3K11,TIA1,ABHD5,BANP,APBB3,RTN3,P4HA1,CACNA1B,UPF2,CDK10,ATP5L,SMARCA5,NUBP1,CTCF,EBP,DRG1,MCART1,MRPS9,TRAPPC1,MAPKAP1,POU2F1,TTRAP,DPY30,KIFAP3,RAB18,CKS1B,CCS,CRY1,PFDN1,WAC,PDCL3,CNIH,ZDHHC12,HSPE1,CCT3,WDR12,TDP1,DHX9,PDLIM7,MRPL22,ANP32A,UBE4A,ICMT,ZNF281,ILF3,BAG4,PABPC1,BAT1,DUSP6,TDRD1,MORF4L2,PTPN2,ATP2C1,M…
TFBS	V$CETS1P54_01	V$CETS1P54_01		0.020669	27	201	FBXO3,MTPN,FNTA,C4orf41,XAB2,GNAI3,DNAJA2,TFE3,CAST,STK4,EPN1,CTCF,SPI1,TRAPPC1,UFC1,PPHLN1,CKS1B,DDX47,GMPR2,RAP2C,RPL6,STARD13,PSMC2,PSMD12,BAG4,BAT1,RGL2
MICRO RNA BINDING SITES
MicroRNA	hsa-miR-124:miRecords_TarBase	hsa-miR-124:miRecords_TarBase	miRecords_TarBase	2.7e-05	34	200	PLDN,CPNE3,ANXA8L2,CHP,MTPN,MAN2A1,HEBP2,RHOG,RYK,MTMR6,PECI,ABHD5,GNAI3,CREB3L2,KLHL24,F11R,ELOVL5,RAVER2,USP49,SP1,VPS37C,CTDSP1,ARPC1B,G3BP1,TMEM109,DCTD,PDLIM7,MAGT1,ITGB1,RAG1AP1,USP48,OSBPL8,TSC22D4,SLC15A4
MicroRNA	miR-192:PicTar	miR-192:PicTar	PicTar	0.032257	16	85	ALCAM,ETV6,LRRFIP1,MTMR4,ARIH2,FZD9,LMO4,CRTC2,ARFGEF1,EAF1,HMGB1,KLF13,NCBP2,PPP1R3D,NKRF,ATP6V1G1
DRUGS
Drug	CID000000888	magnesium	Stitch	0.003868	116	1329	TRPM6,PTK2B,ACP1,GNL3,PAPOLA,ADCY7,SLA,MTHFD2,ARL5A,ALAD,ALPP,MATK,PAPSS1,TRIM39,SDHA,APEX1,SMUG1,DMC1,G6PD,FYN,MDH1,ARHGDIA,RHOA,FNTA,RPLP0,ATP1A1,RAB31,MMP9,ANTXR2,ATP1B3,CCRN4L,GTPBP6,TCIRG1,GYS1,MYO5A,CERK,AASDHPPT,F11R,NADSYN1,MMP23B,CCT7,DYNLL1,PRKD2,CCT2,DGAT1,NME2,MRPL20,CDC42,LRBA,MRPS11,MRPS9,PPM1B,PPAT,CHKB,POLR2D,HPRT1,PPM1K,PRKCZ,PKN2,PKN1,NCBP2,CTDSP1,XRCC2,PRKCH,ZFYVE20,HK2,HK3,RAB…
GENE ONTOLOGY CATEGORIES
GO: Molecular Function	GO:0003723	RNA binding		0.000663	70	766	XRN1,SNRPF,SNRPN,SFRS2B,PAPOLA,FUBP3,RSL1D1,ETF1,SYNJ1,ATXN1,LRRFIP1,RPS7,RPL34,RPLP0,RPS15A,PPIE,TIA1,LSM4,ZFP36L1,EXOSC1,RBM25,PRKRA,UPF2,APOBEC3G,RAVER2,PNPT1,SPI1,DDX17,MRPL20,LSM3,DDX19A,CNBP,EXOSC10,HMGB1,PRKCSH,HNRNPU,NCBP2,HNRNPAB,SF3B14,EXOSC7,EIF4H,RBMX,PPP1R8,DDX47,DDX51,ROD1,G3BP1,UBR5,ZMAT3,DDX10,DHX9,FXR1,DICER1,NKRF,RBM4,RPL6,RPL8,RPL12,RNASEL,ILF3,FYTTD1,SLBP,PABPC1,BAT1,THOC3,PSM…
GO: Cellular Component	GO:0005730	nucleolus		2.3e-05	81	881	GNL3,PAPOLA,YPEL2,RSL1D1,MBD4,UTP14A,ETV6,ATXN1,S100A12,FRG1,STK40,SMUG1,WDR74,RPS7,YPEL3,USP8,PAK1IP1,NVL,TNFRSF1B,RTN3,EXOSC1,METT11D1,LIN52,SMARCA5,NBN,NCF2,APOBEC3G,CTCF,CBFA2T3,CCT2,SP1,SDAD1,STAT3,STAT4,OXR1,PPP1CA,C14orf106,EXOSC10,ZNF18,HMGB1,HLX,MAPK3,EXOSC7,HIF1A,ZNF330,DDX47,DDX51,PQBP1,ZNF655,ARL4A,ZMAT3,TMEM109,TP53INP1,WDR12,TRIM13,SERPINA1,MTA2,DDX10,DHX9,ACSS2,SAP30L,FXR1,NKRF,RBM…
GO: Cellular Component	GO:0030529	ribonucleoprotein complex		0.000195	55	544	SNRPF,SNRPN,MRPS21,RSL1D1,UTP14A,FRG1,APEX1,MRPL46,RPS6KB1,RPS7,RPL34,RPL7L1,RPLP0,RPS15A,RPS17,PPIE,XAB2,LSM4,METT11D1,IVNS1ABP,RAVER2,RUVBL1,MRPL20,MRPS11,MRPS9,MRPL34,LSM3,HNRNPU,HNRNPAB,RBMX,PPP1R8,WAC,MRPL35,WDR12,DHX9,FXR1,MRPL22,MRPL15,DICER1,MRPL18,TDRD7,RPL6,RPL8,RPL12,RPL17,ILF3,SLBP,PABPC1,BAT1,MRPS27,TDRD1,RPL39L,PSMA1,BOP1,MRPL17
HUMAN PHENOTYPES AND DISEASES
Disease	D001284	Atrophy	CTD	0.04351	3	3	RPS6KB1,STAT3,MAPK3
MOLECULAR AND CELLULAR PATHWAYS
None

[truncated: 6 more sheets: PC1 RC NLP5, PC1 RC TOP1000, PC2 RC NLP5, PC2 RC TOP1000, PC3 RC NLP5, PC3 RC TOP1000]
